# Supplementary material for: Synthesis and Evaluation of New Pyrazoline Derivatives as Potential Anticancer Agents in HepG-2 Cell Line
Source: MDPI journal article supplement (doi:10.3390/molecules22030467), 2017-03-16

# Synthesis and Evaluation of New Pyrazoline Derivatives as Potential Anticancer Agents in HepG-2 Cell Line

Wei jie Xu <sup>1,†</sup>, Ying Pan <sup>1,†</sup>, Hong Wang <sup>1,†</sup>, Haiyan Li <sup>2</sup>, Qing Peng <sup>3</sup>, Duncan Wei <sup>1</sup>, Cheng Chen <sup>1</sup> and Jinhong Zheng <sup>1,\*</sup>

<sup>1</sup> Department of Chemistry, Shantou University Medical College, Shantou 515041, Guangdong, China; 13536920534@163.com (W.X.); ypan@stu.edu.cn (Y.P.); 13592851552@163.com (H.W.); weiduncan2012@163.com (D.W.); 13411963192@163.com (C.C.); [jhzheng@stu.edu.cn](mailto:jhzheng@stu.edu.cn) (J.Z)

<sup>2</sup> Department of Pharmacology, Shantou University Medical College, Shantou 515041, Guangdong, China; [13066360950@163.com](mailto:13066360950@163.com) (H.L.)

<sup>3</sup> Department of Hepatobiliary Surgery II, Zhujiang Hospital of Southern Medical University, Guangzhou 510280, Guangdong, China; [zhujiangzhuanhua@163.com](mailto:zhujiangzhuanhua@163.com) (Q.P.)

\* Correspondence: [jhzheng@stu.edu.cn](mailto:jhzheng@stu.edu.cn); Tel.: +86-754-8890-0499; Fax: +86-754-8855-7562

† These authors contributed equally to this work.

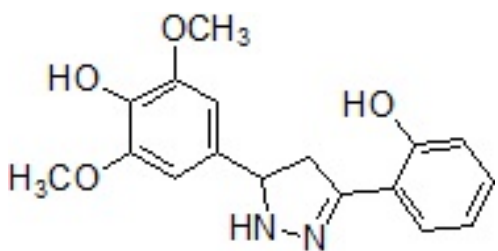

b1

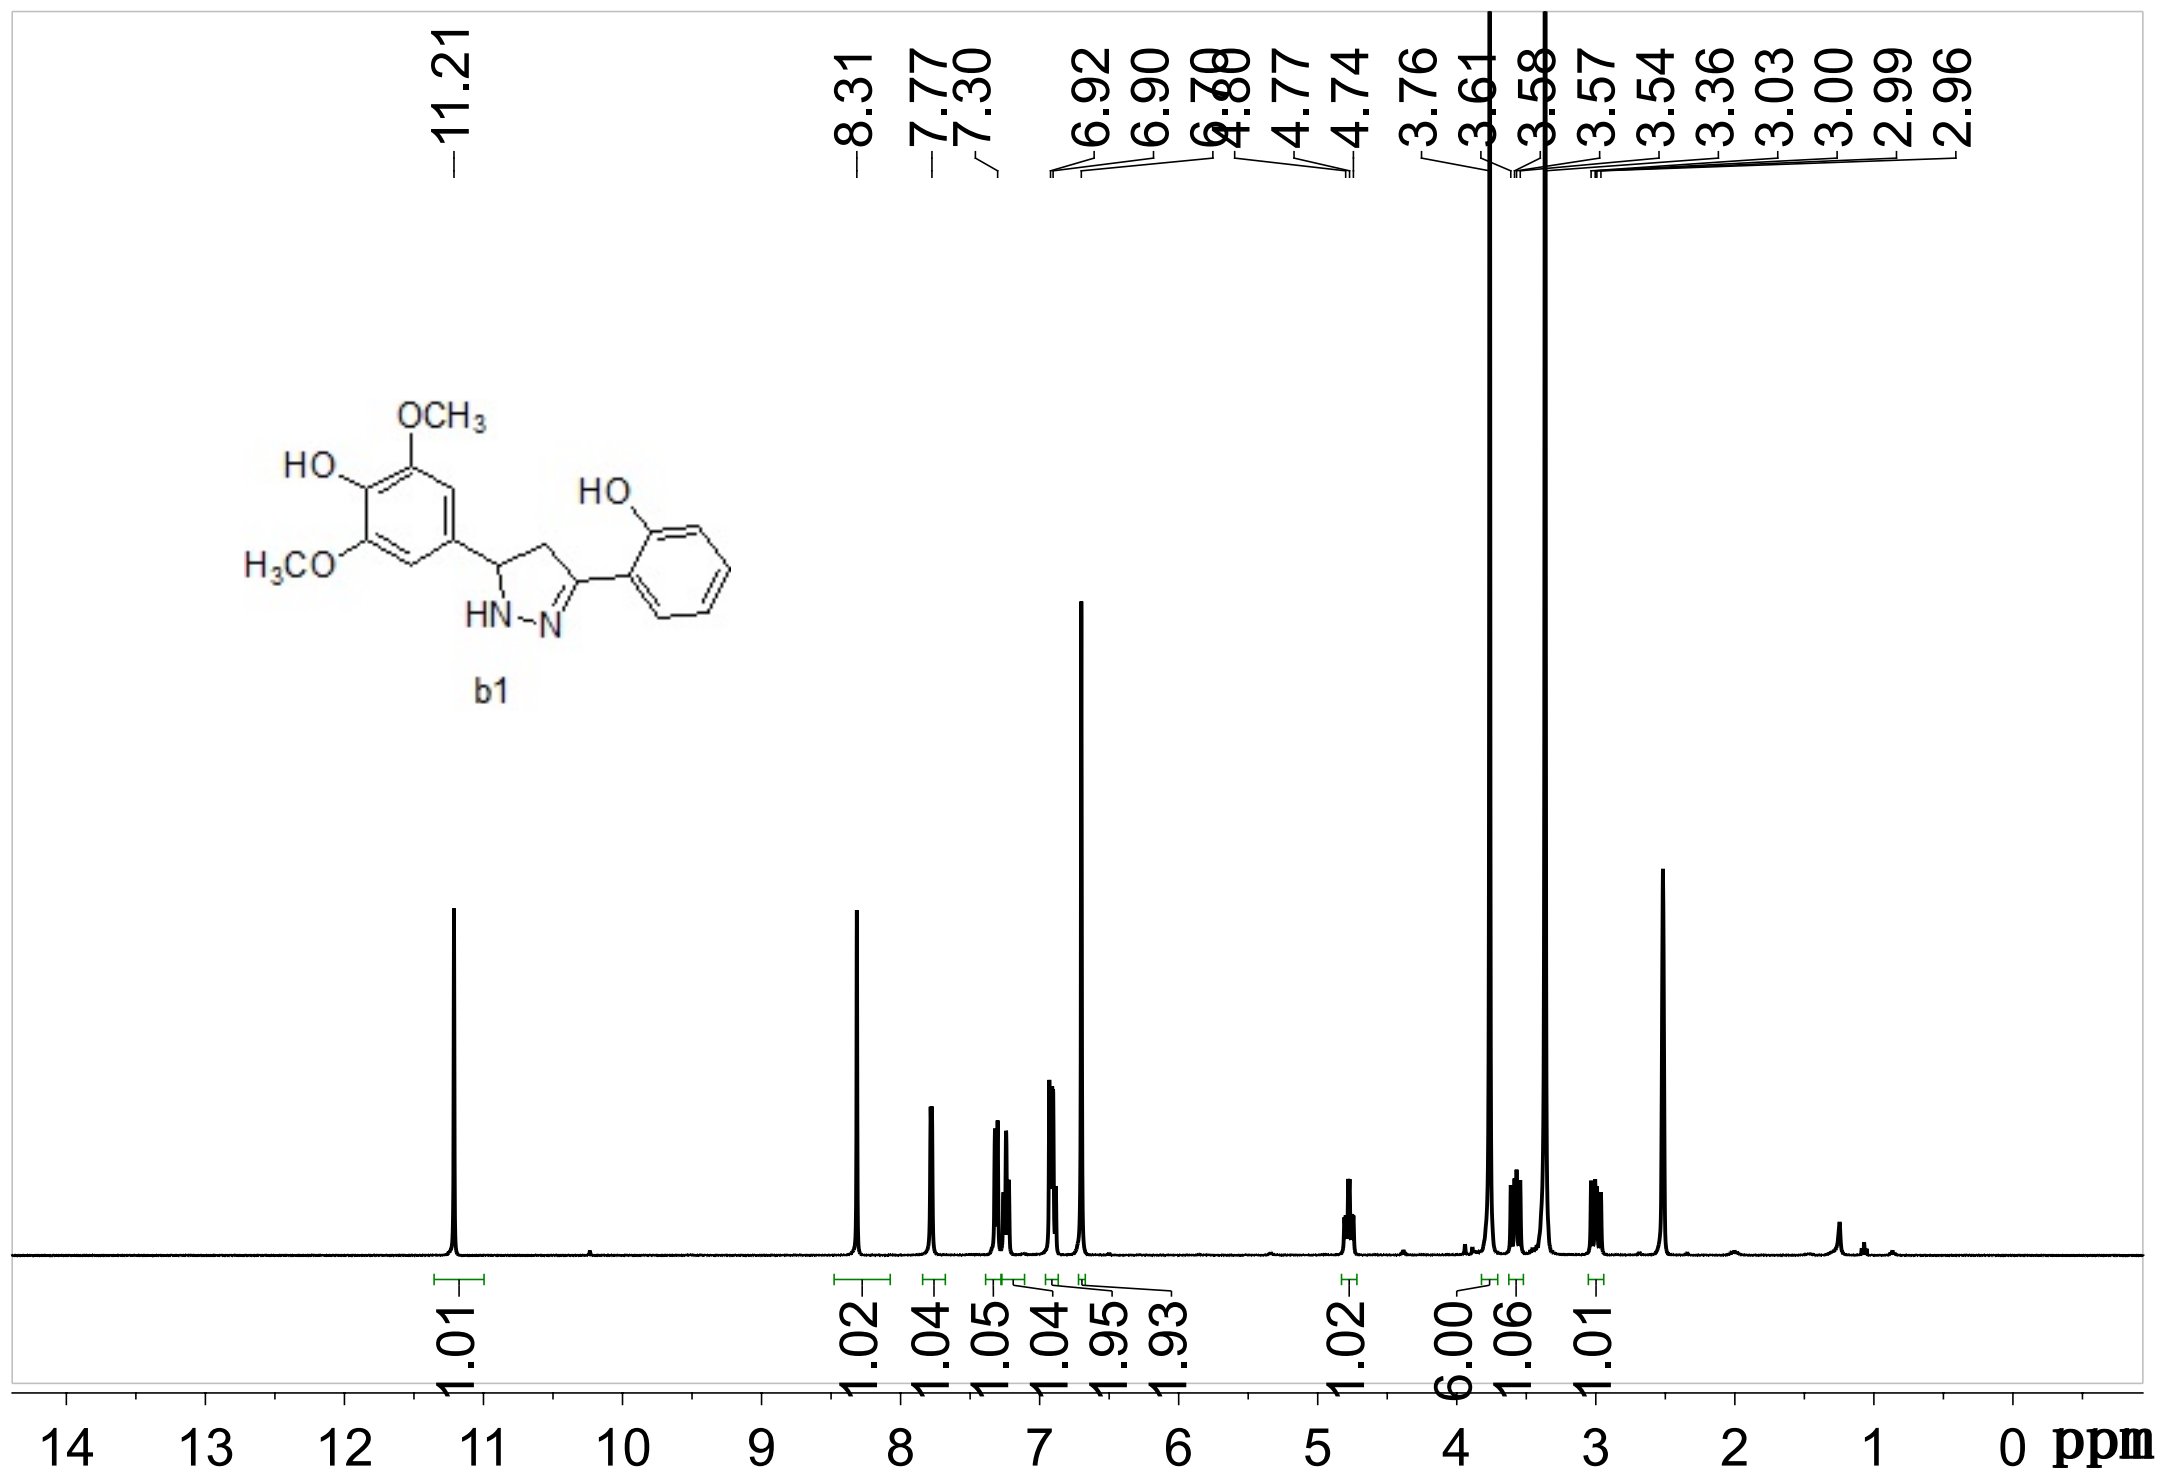

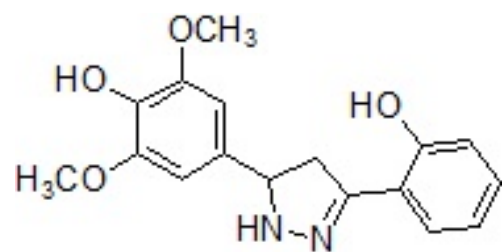

b1

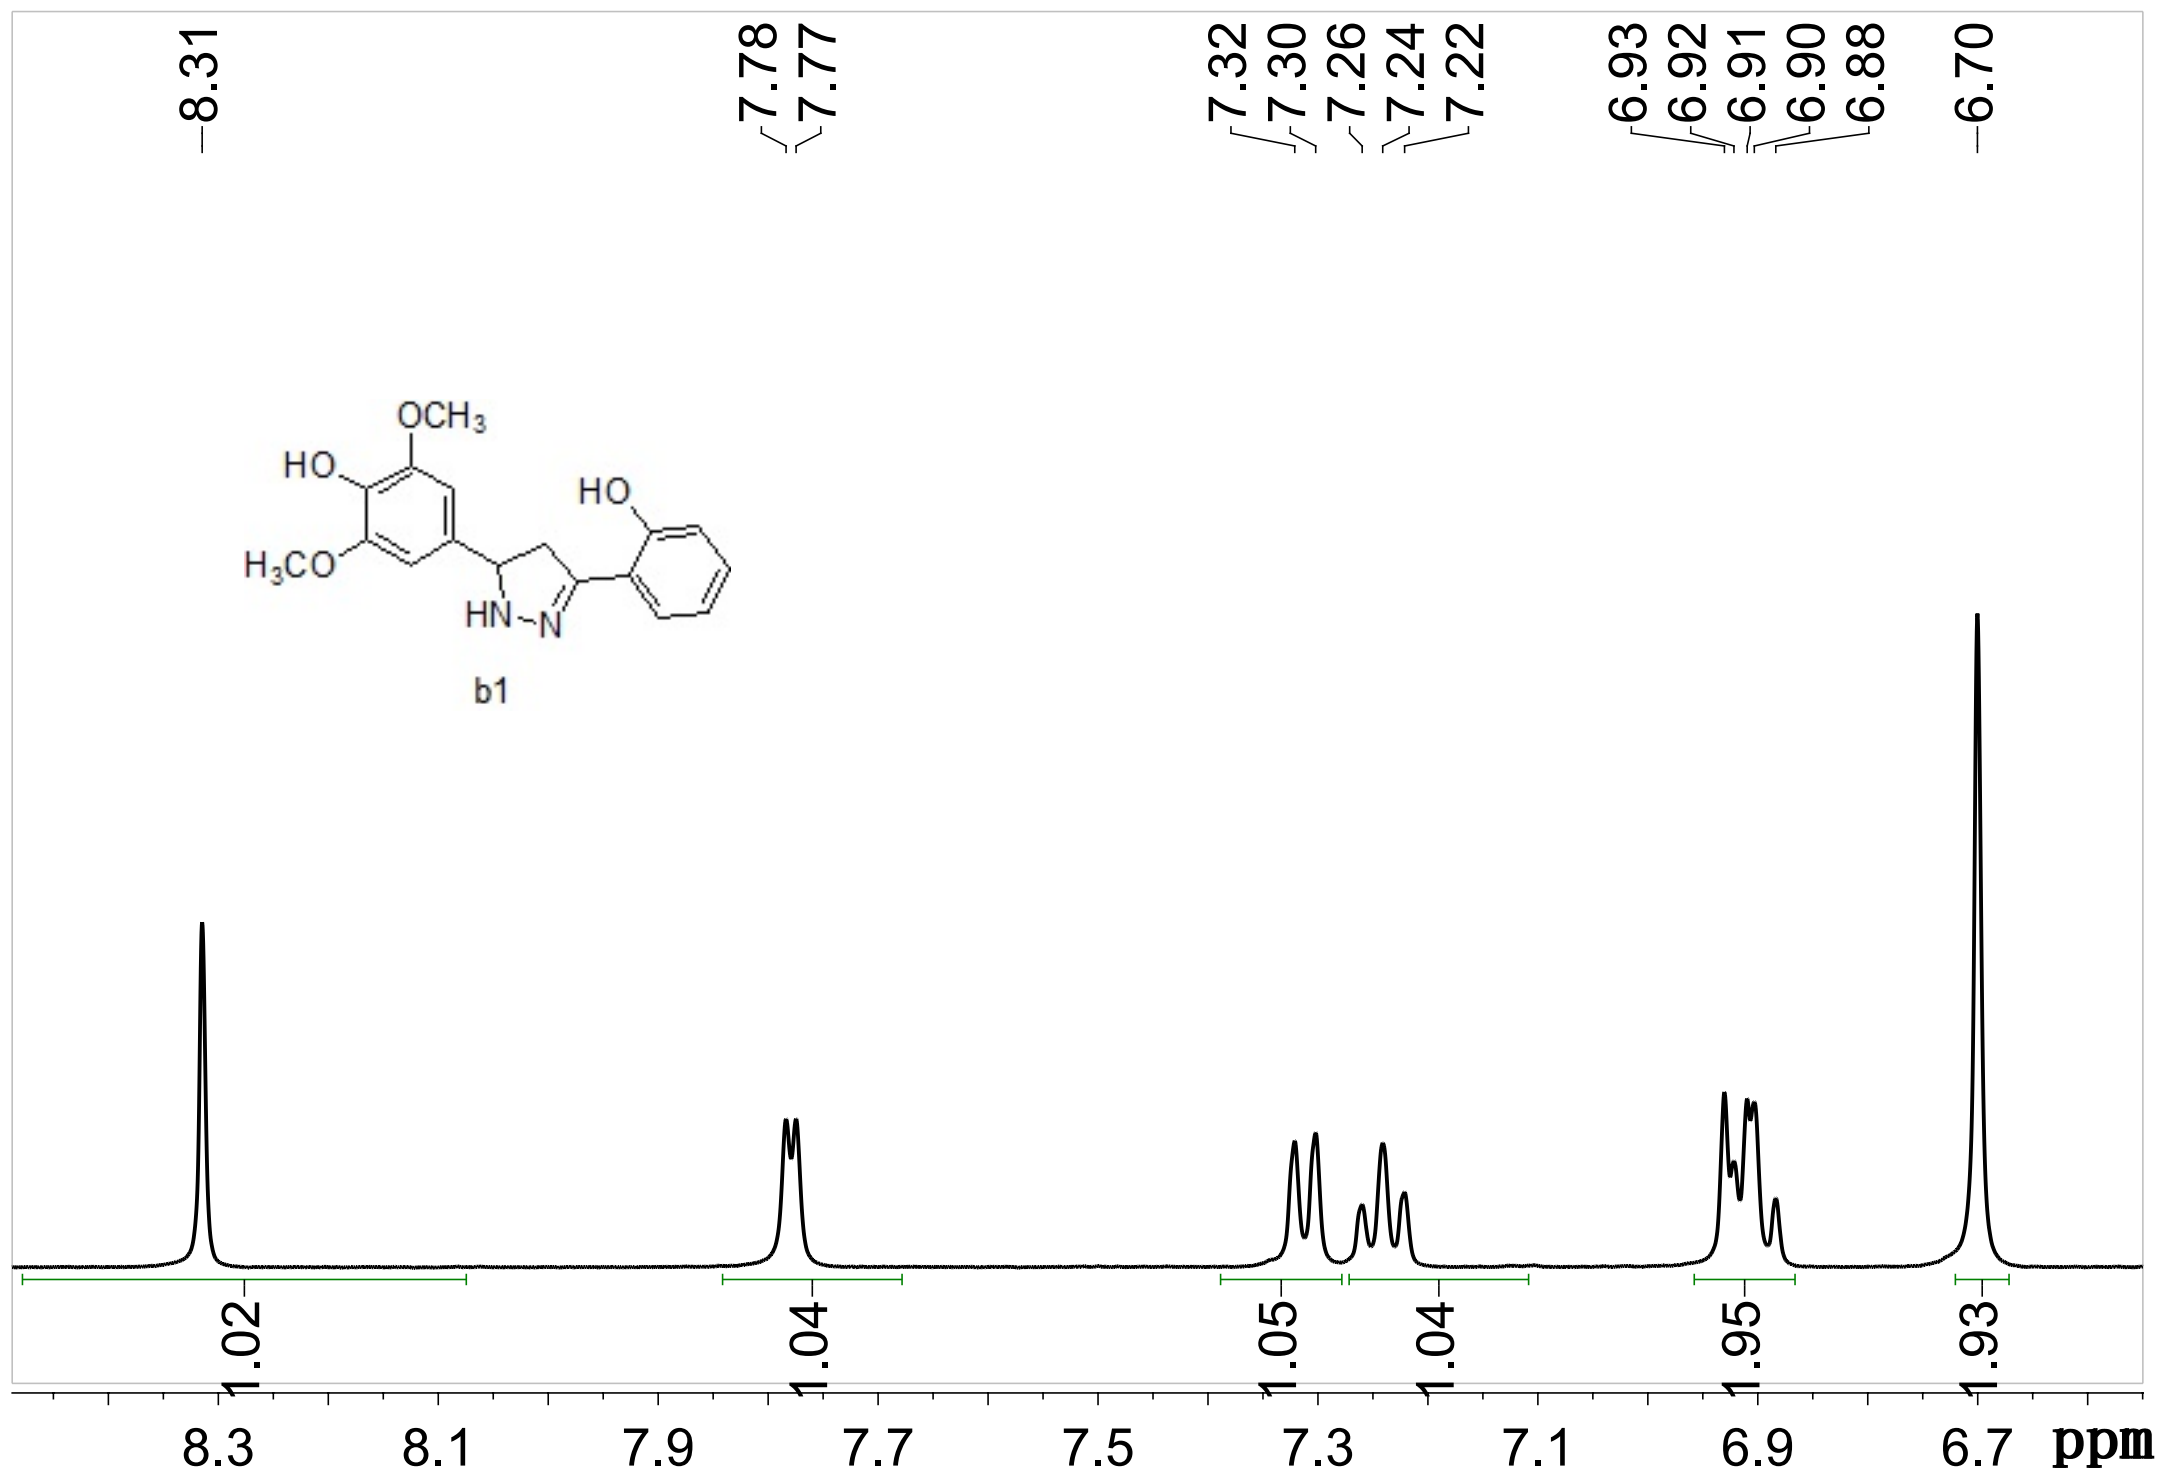

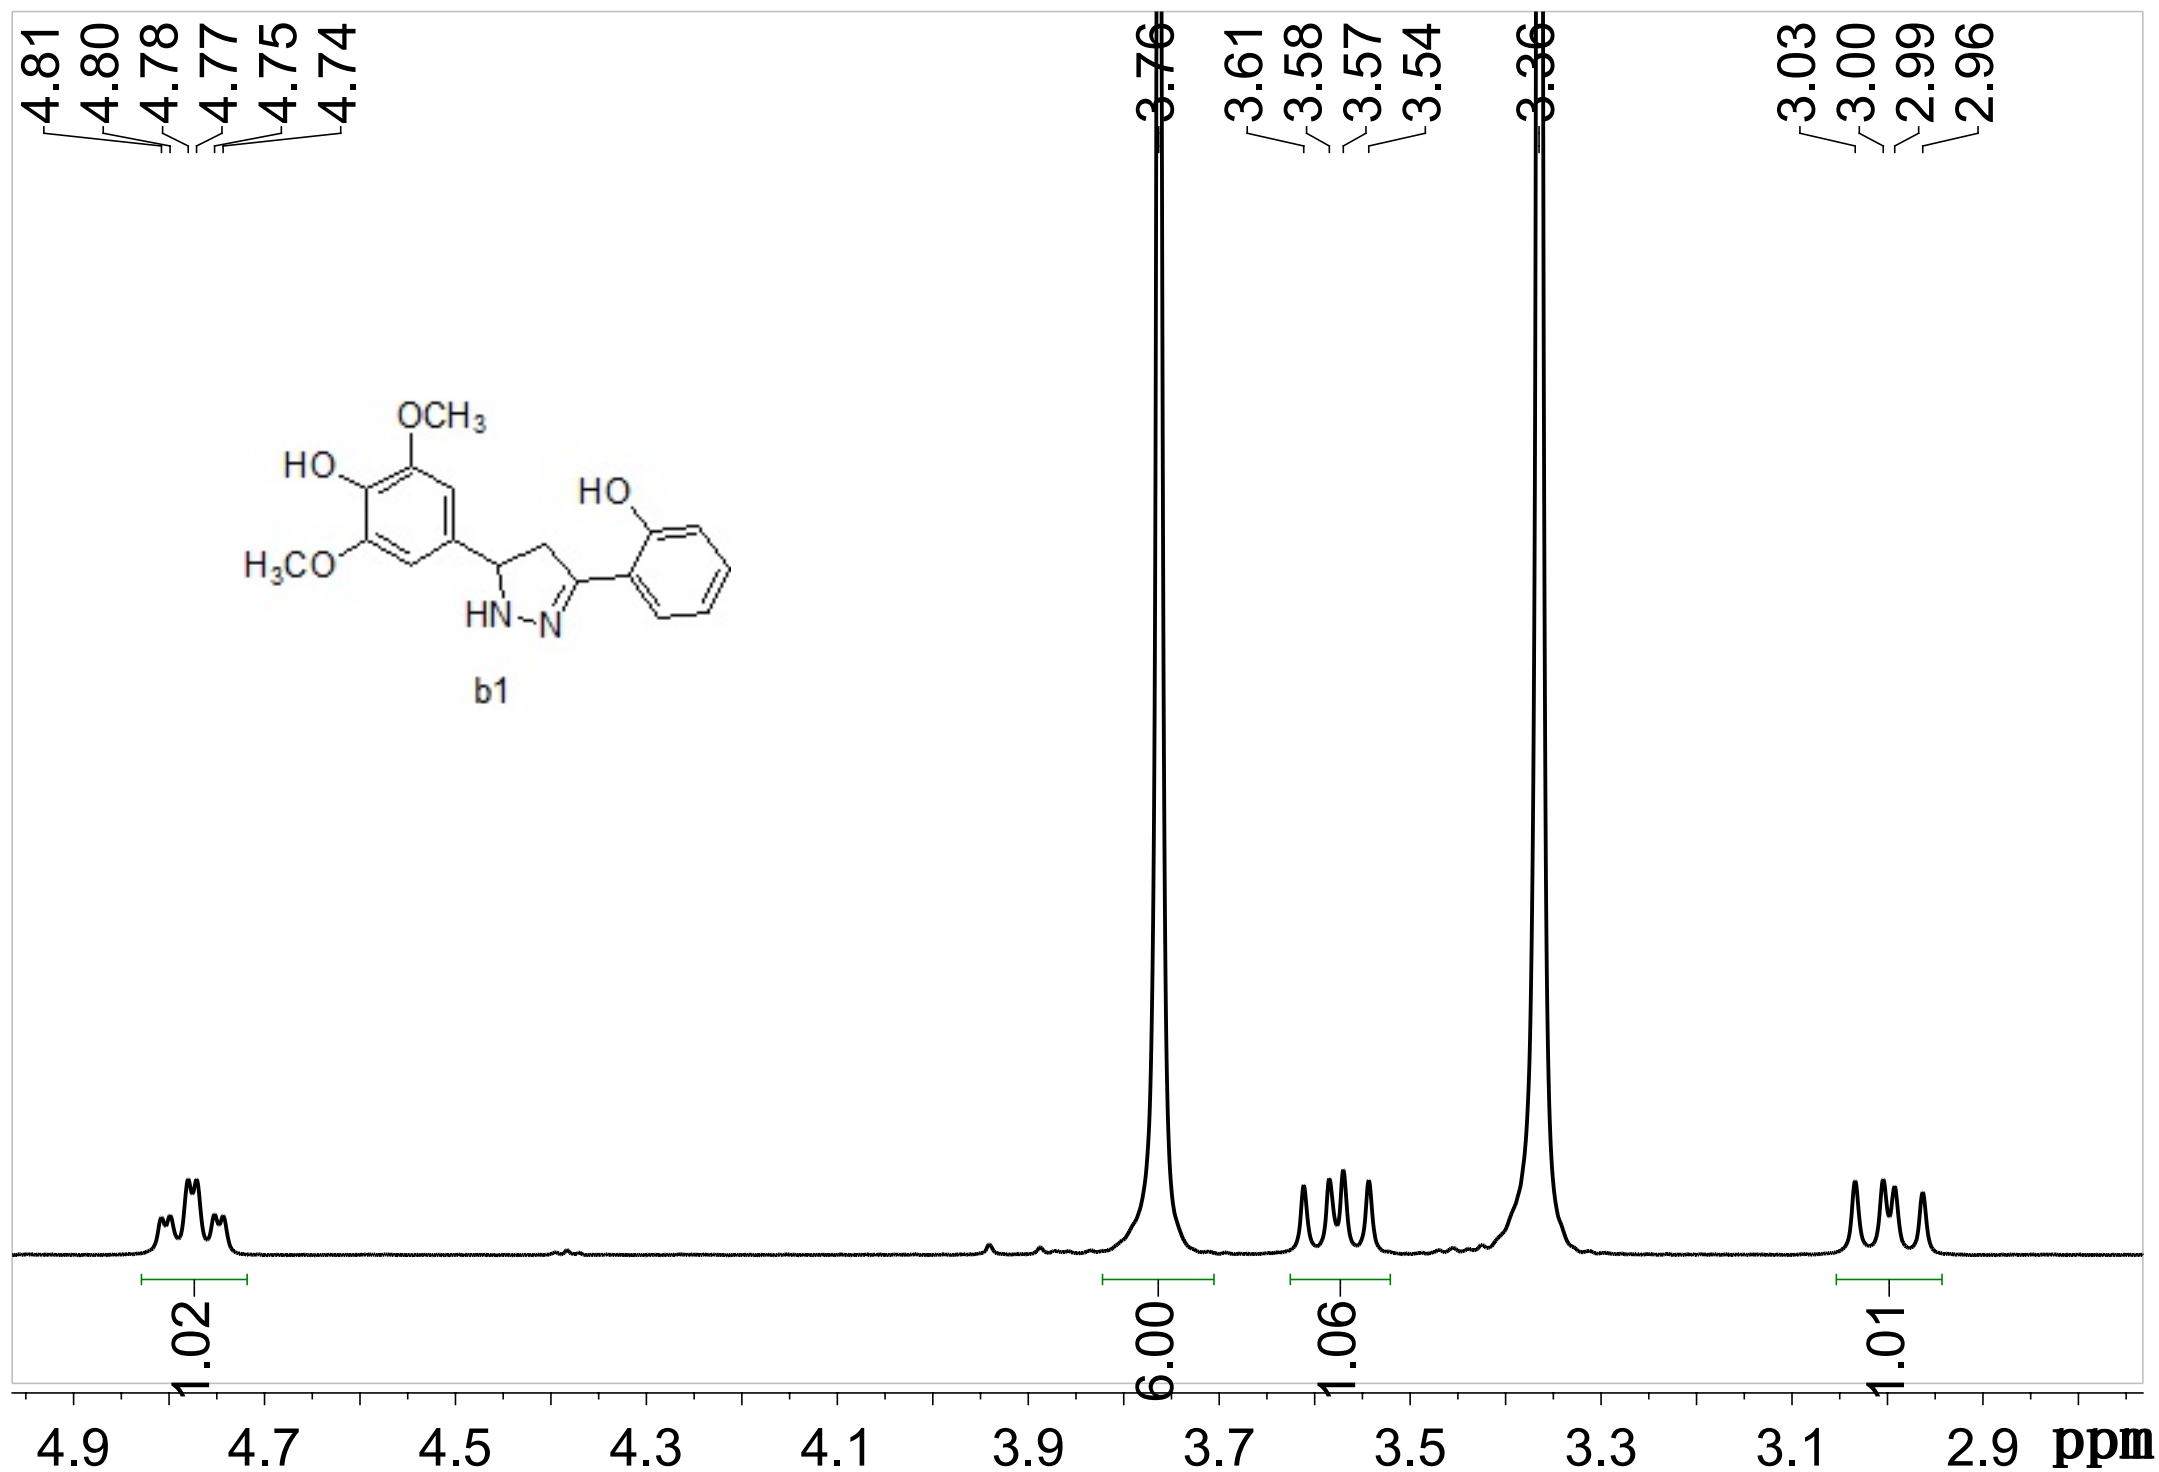

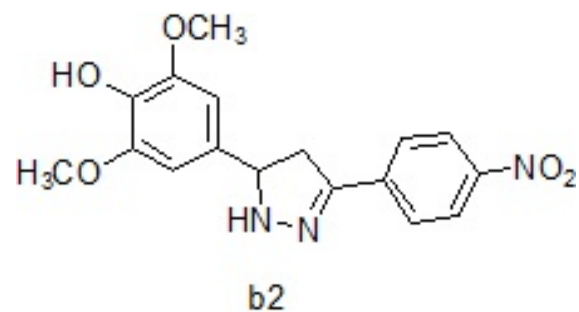

Chemical shift values (ppm) for the aromatic region:

- 8.32
- 8.24
- 8.23
- 8.22
- 8.21
- 8.21
- 8.19
- 8.19
- 7.83
- 7.83
- 7.81
- 7.81
- 7.80
- 6.65

Chemical shift values (ppm) for the aliphatic region:

- 4.91
- 4.88
- 4.85
- 3.74
- 3.50
- 3.47
- 3.45
- 3.38
- 3.38
- 2.96
- 2.93
- 2.92
- 2.89

Integration values for the peaks:

- 1.07
- 1.01
- 1.02
- 1.01
- 1.03
- 0.91
- 2.11
- 1.06
- 6.00
- 1.08
- 1.09

Chemical shift scale (ppm): 14, 13, 12, 11, 10, 9, 8, 7, 6, 5, 4, 3, 2, 1, 0 ppm

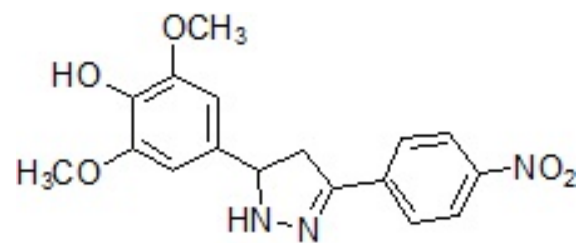

b2

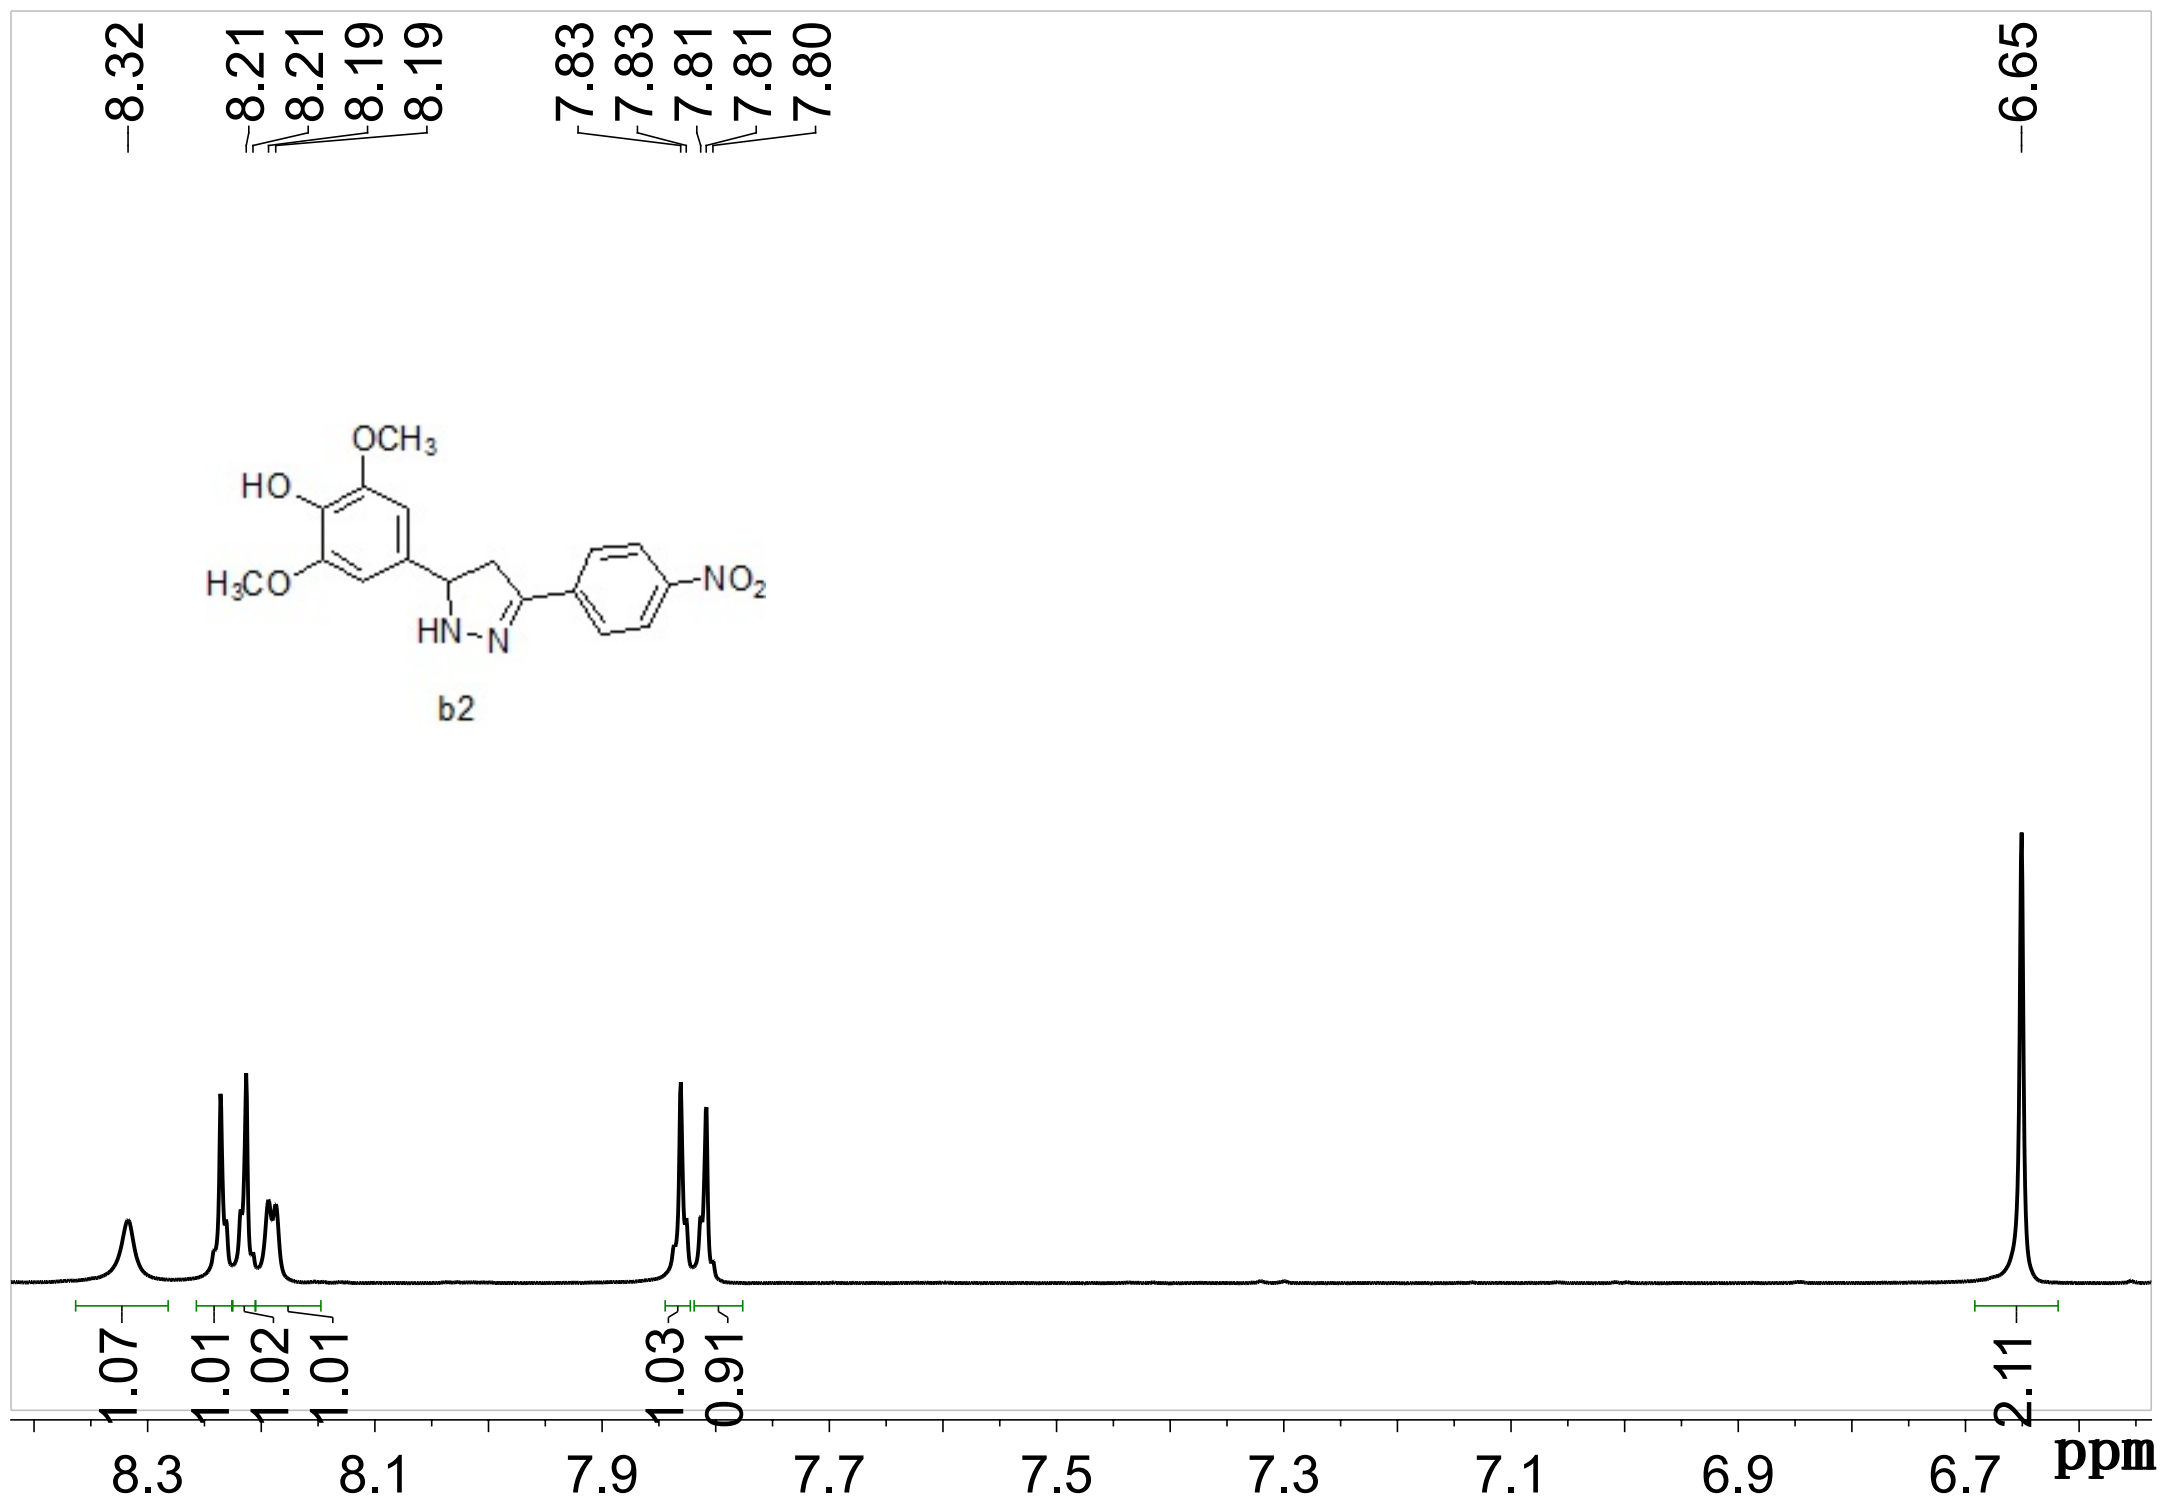

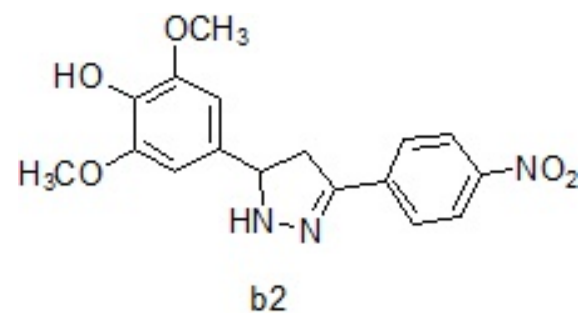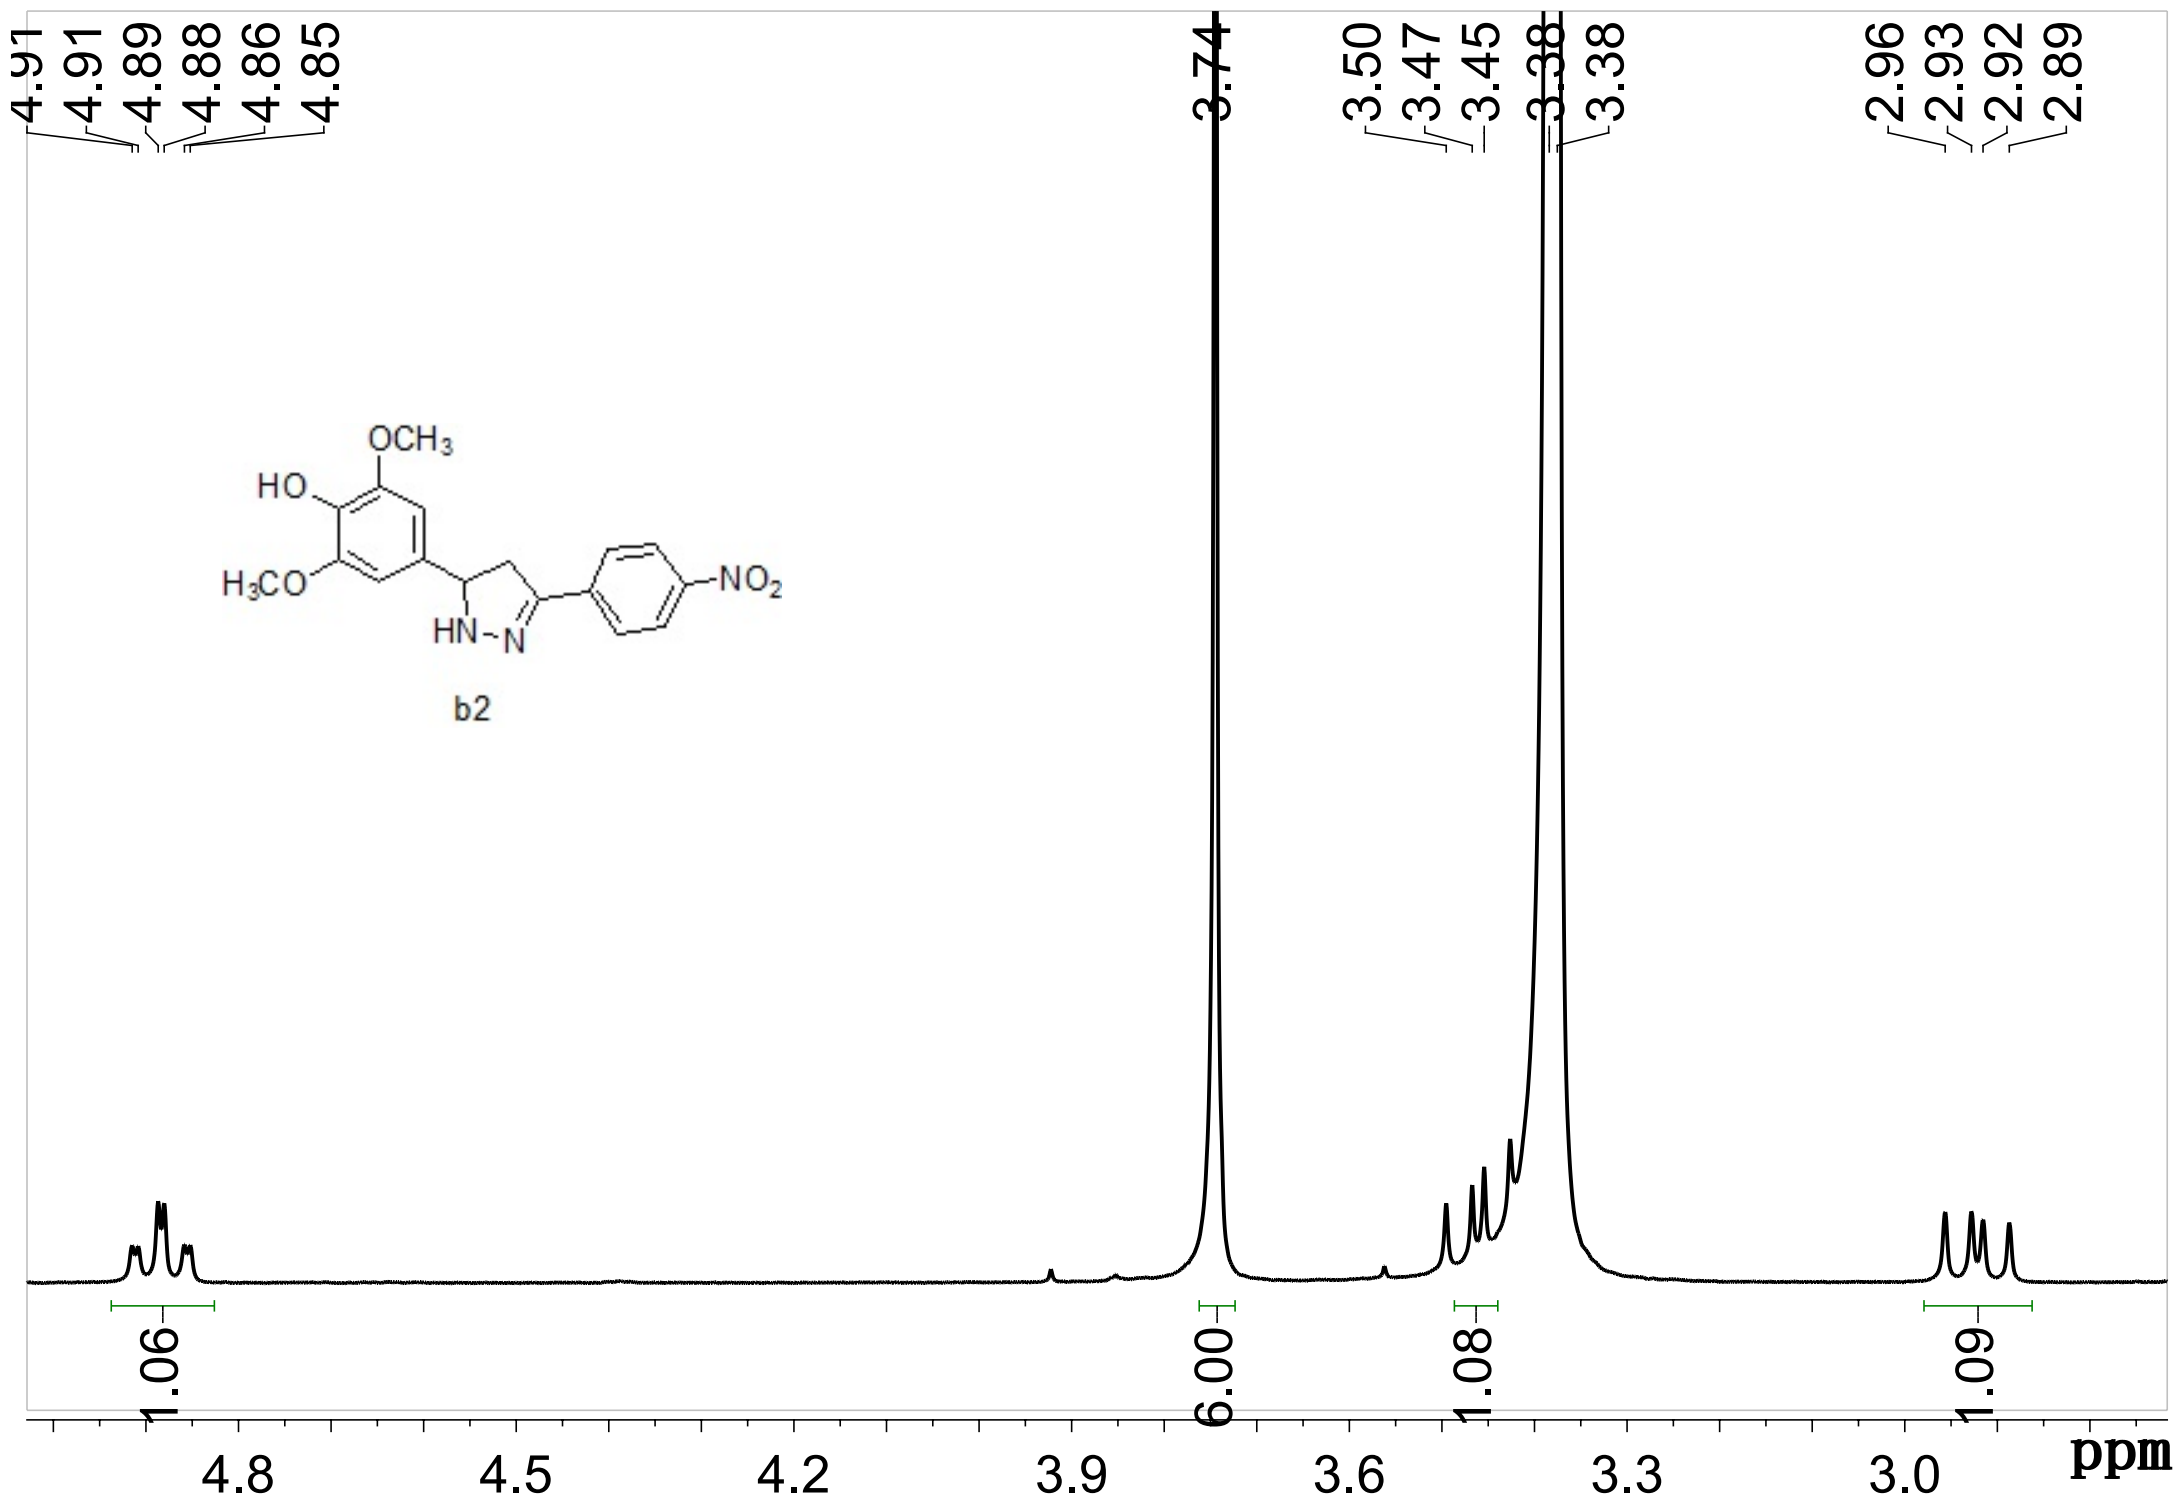

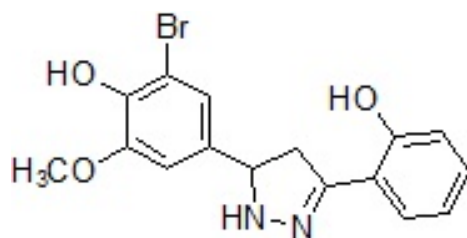

**b3**

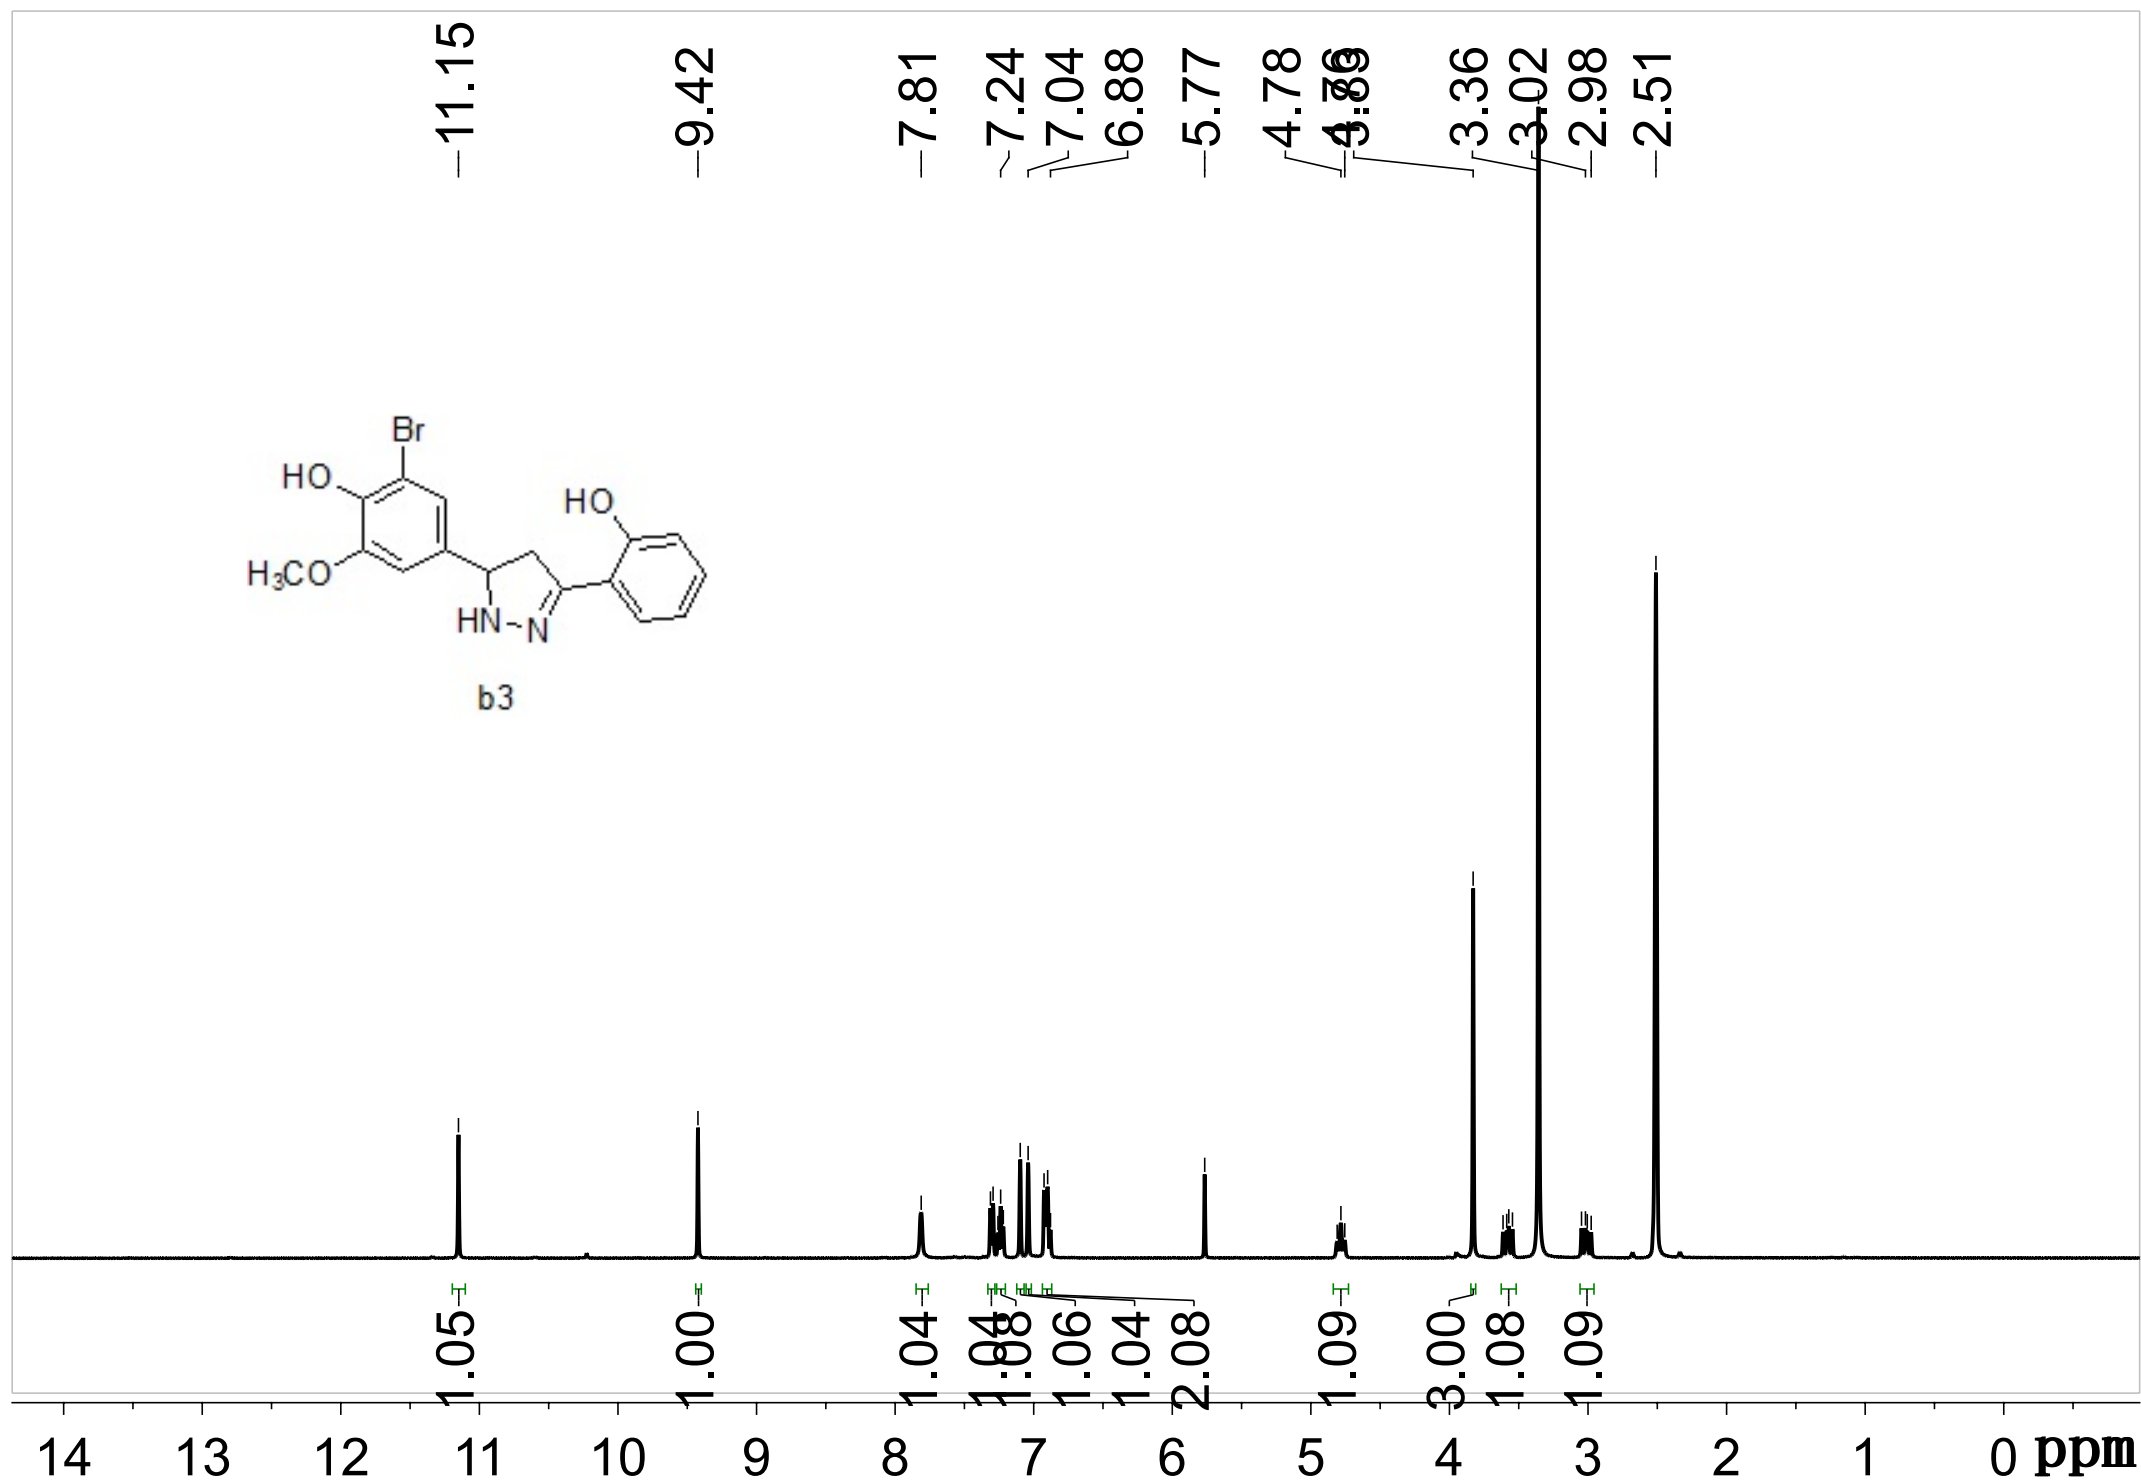



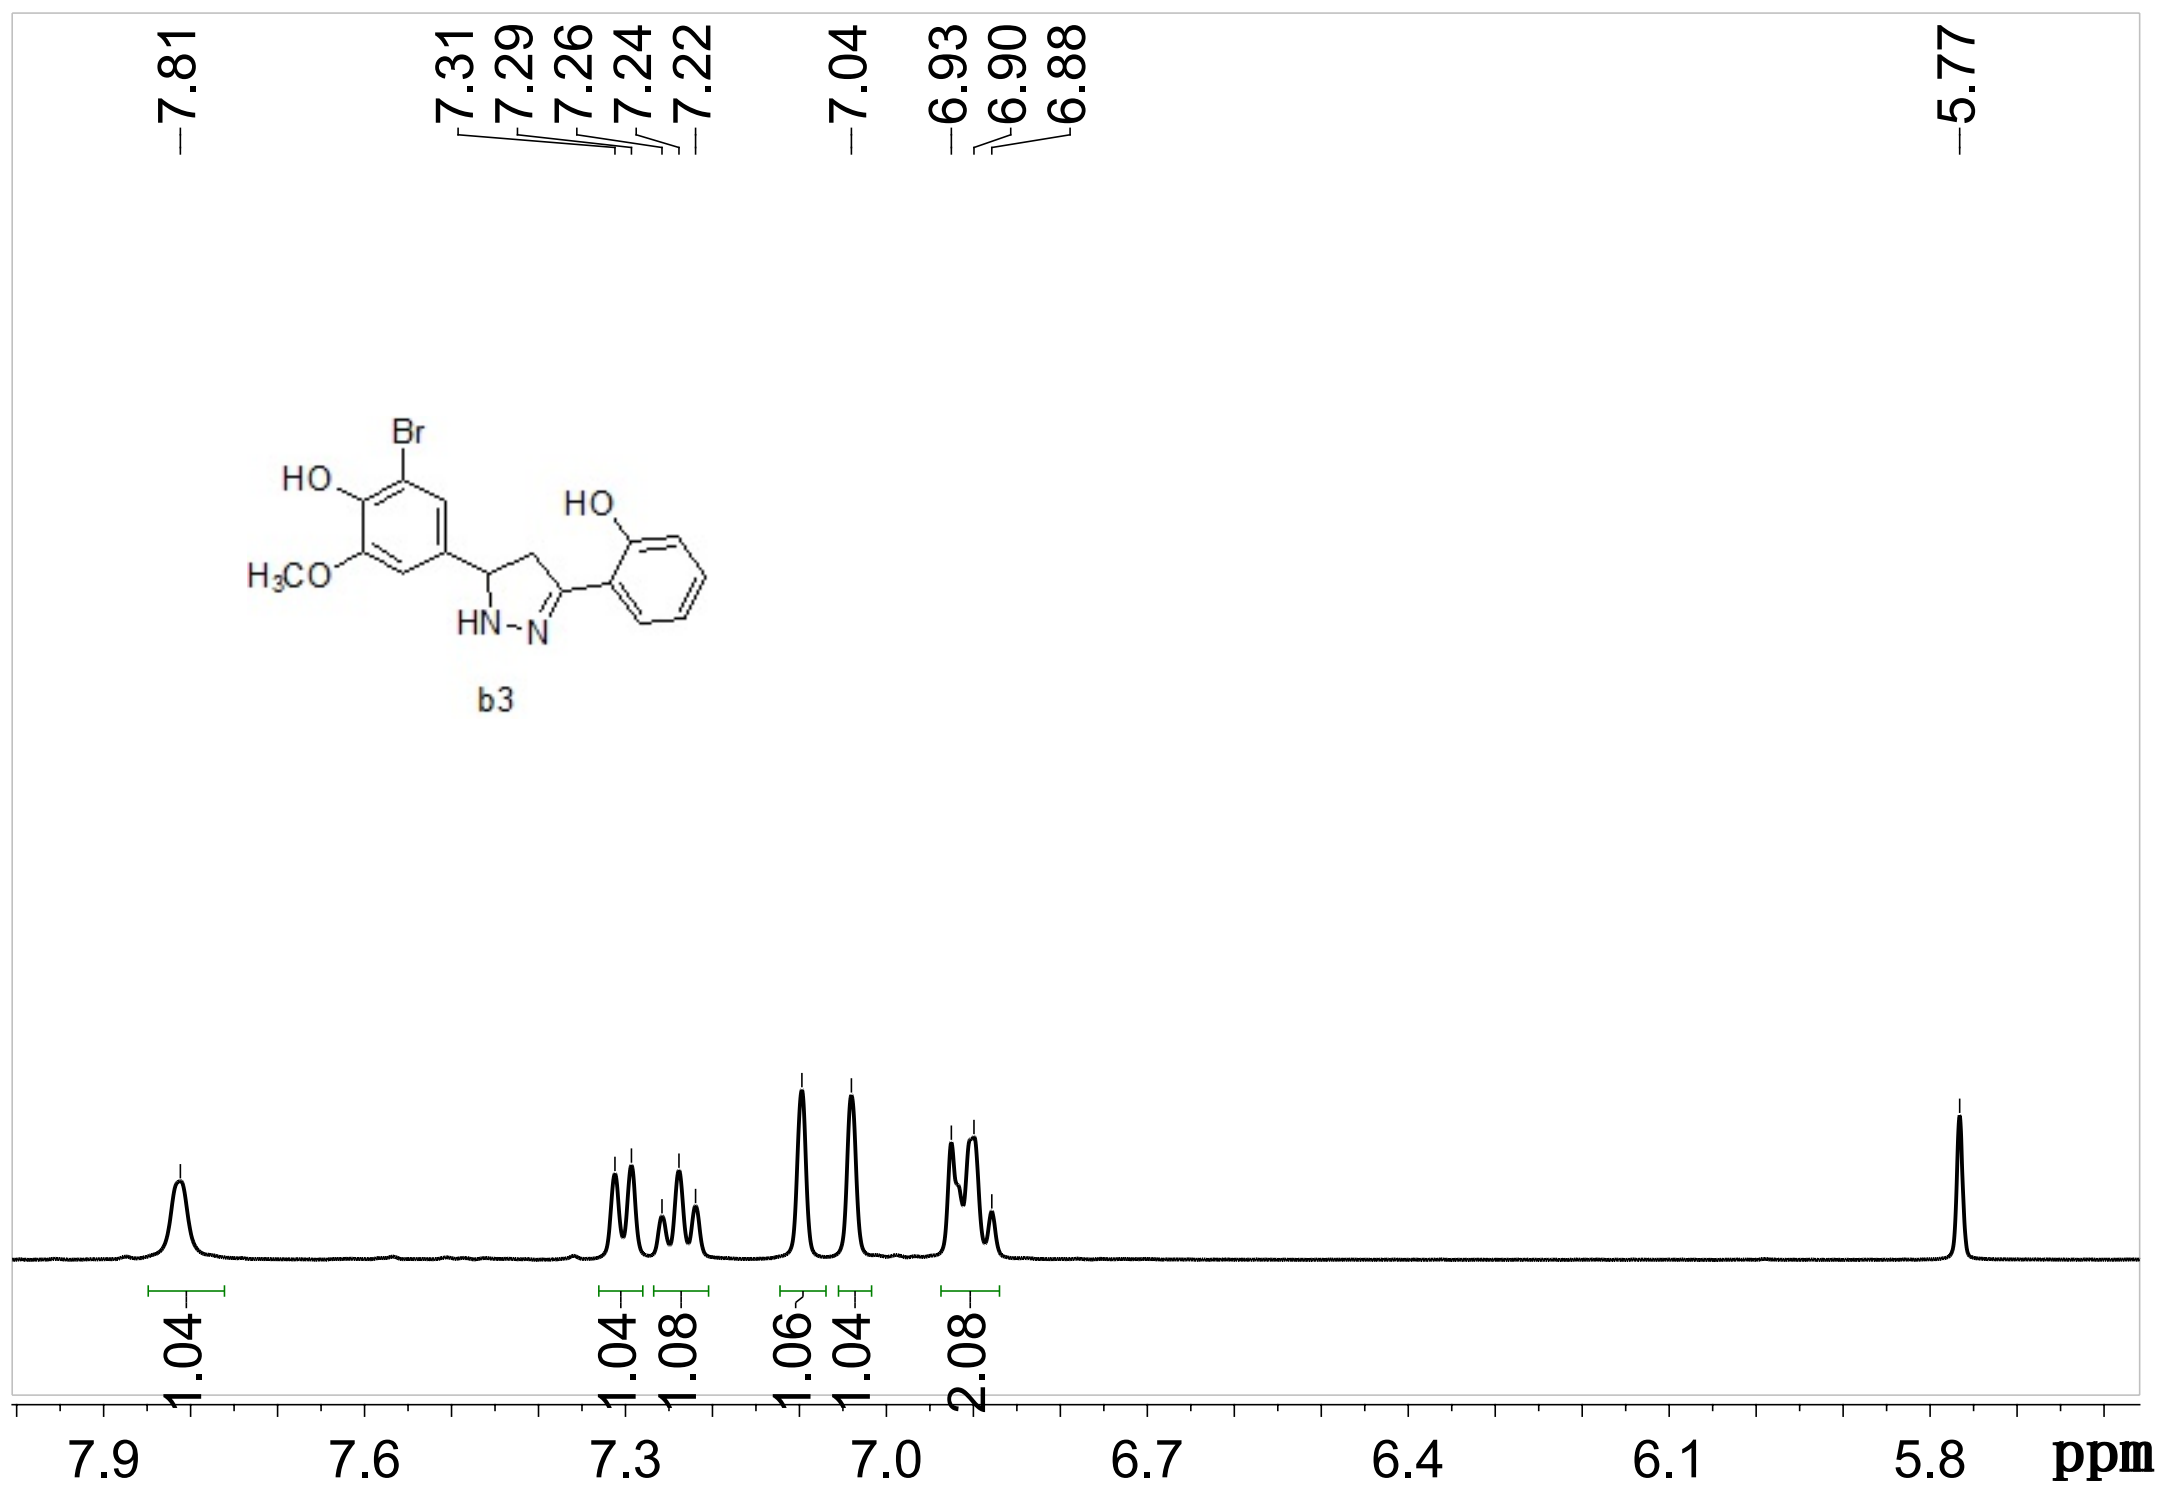

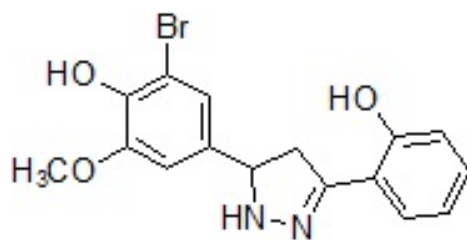

b3

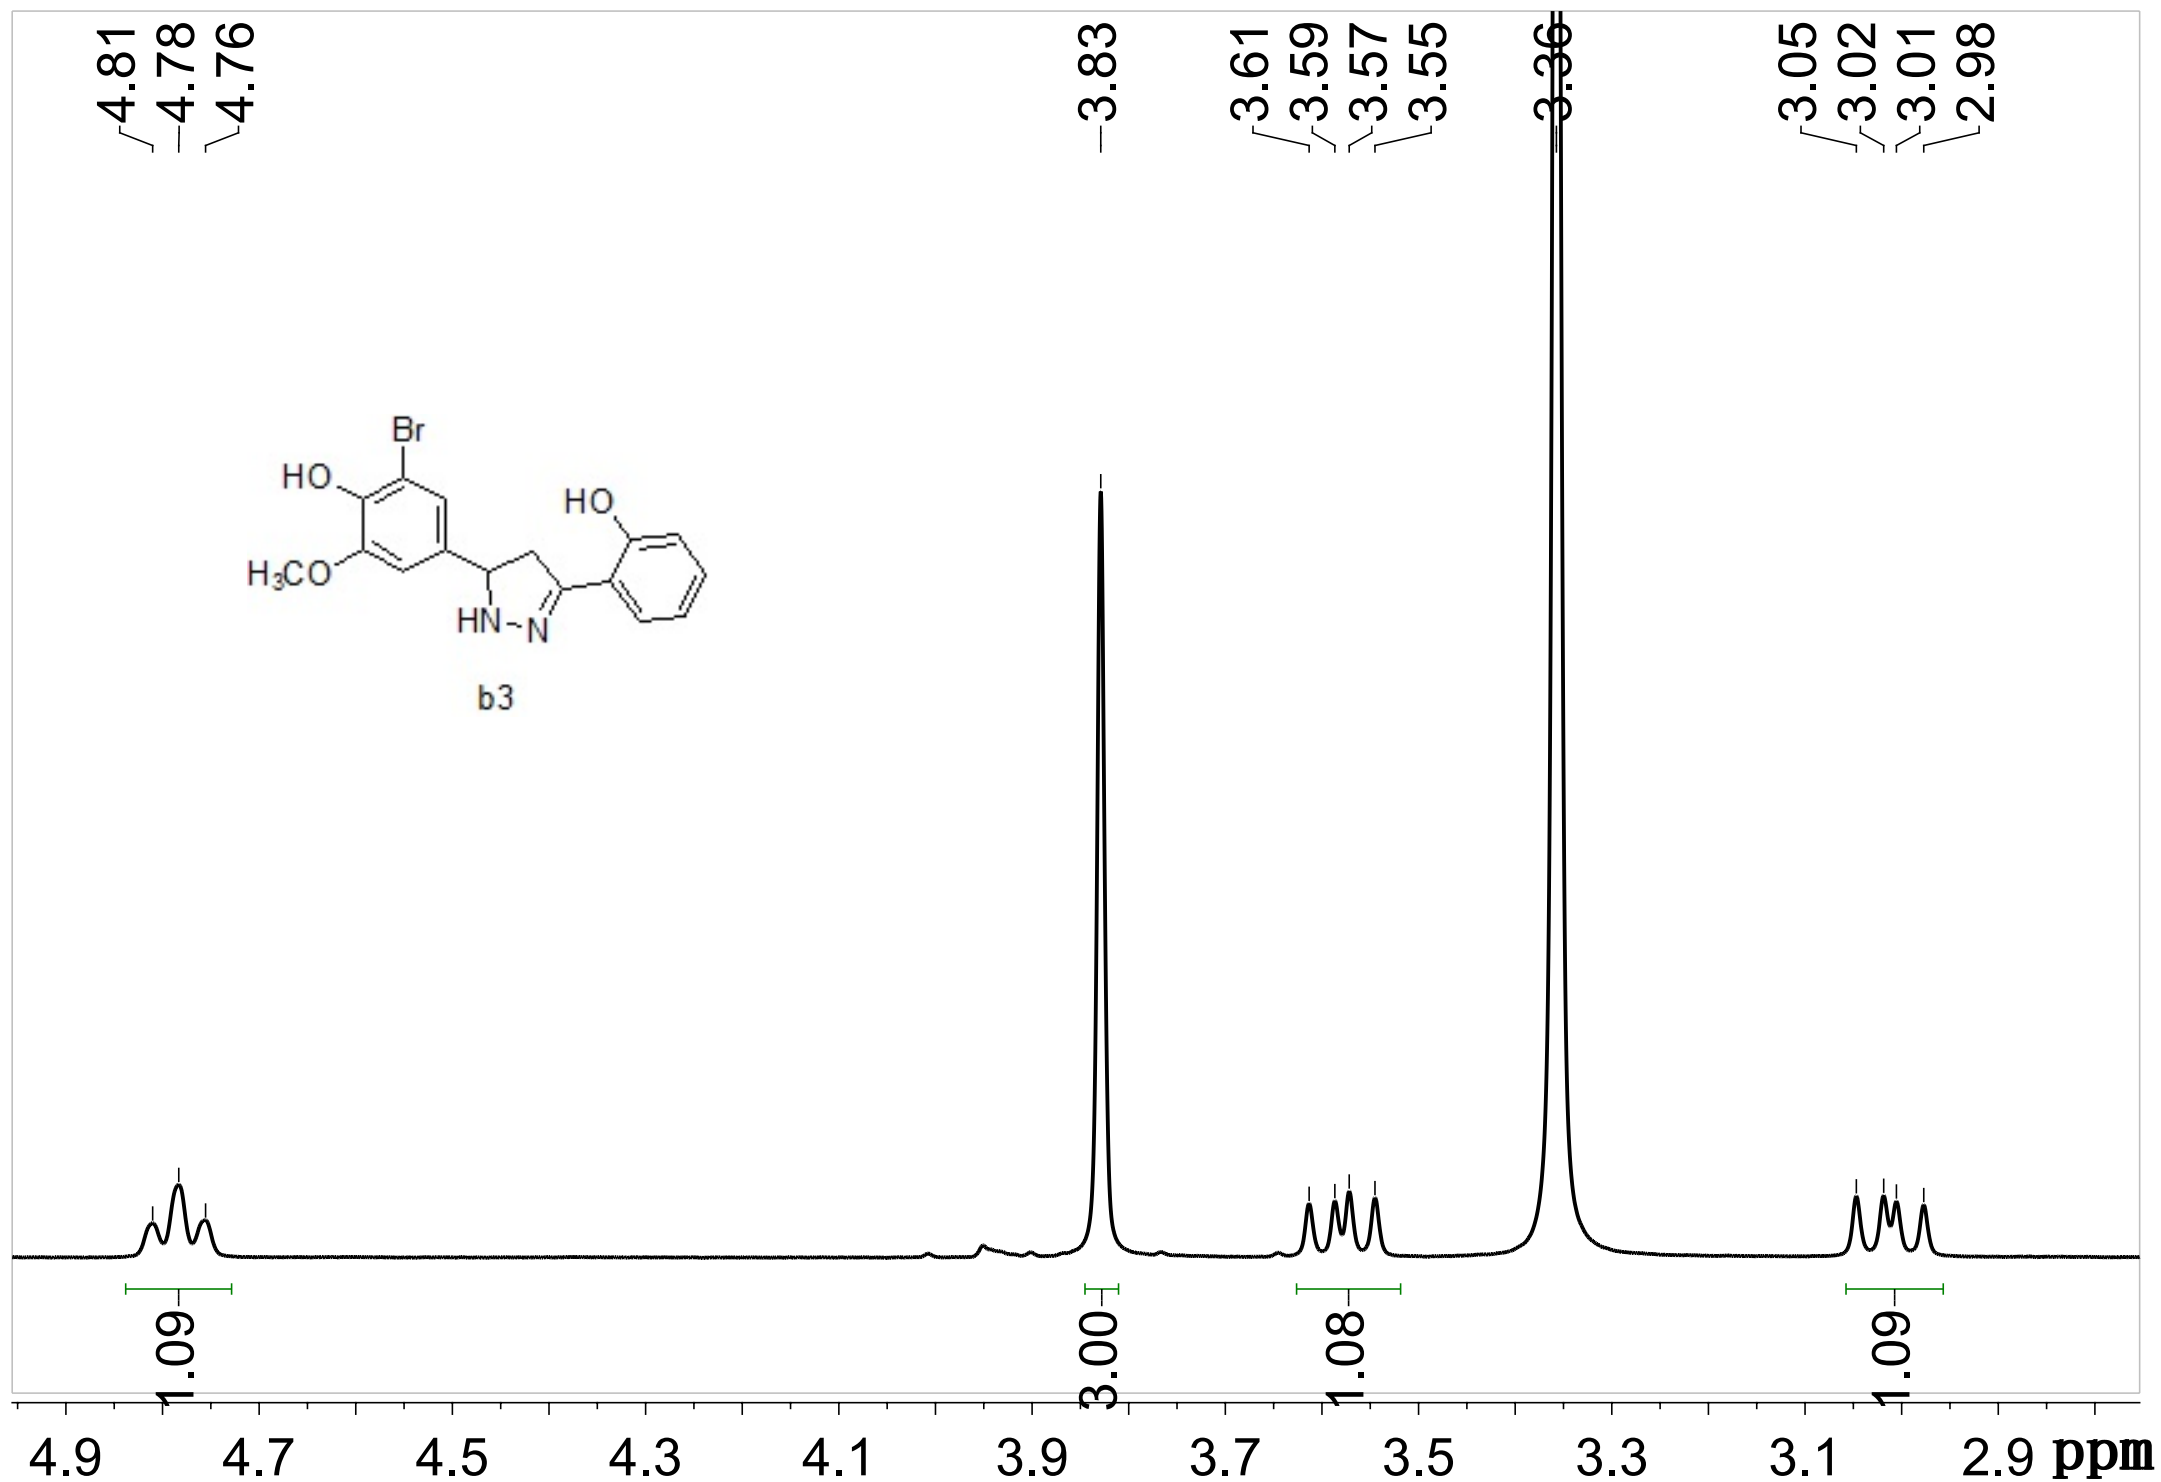

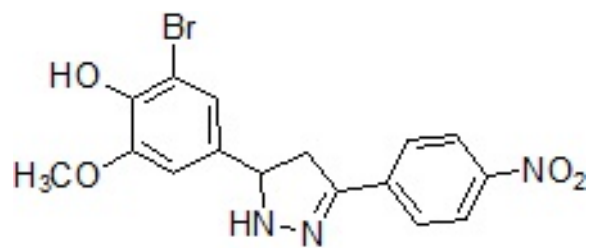

b4

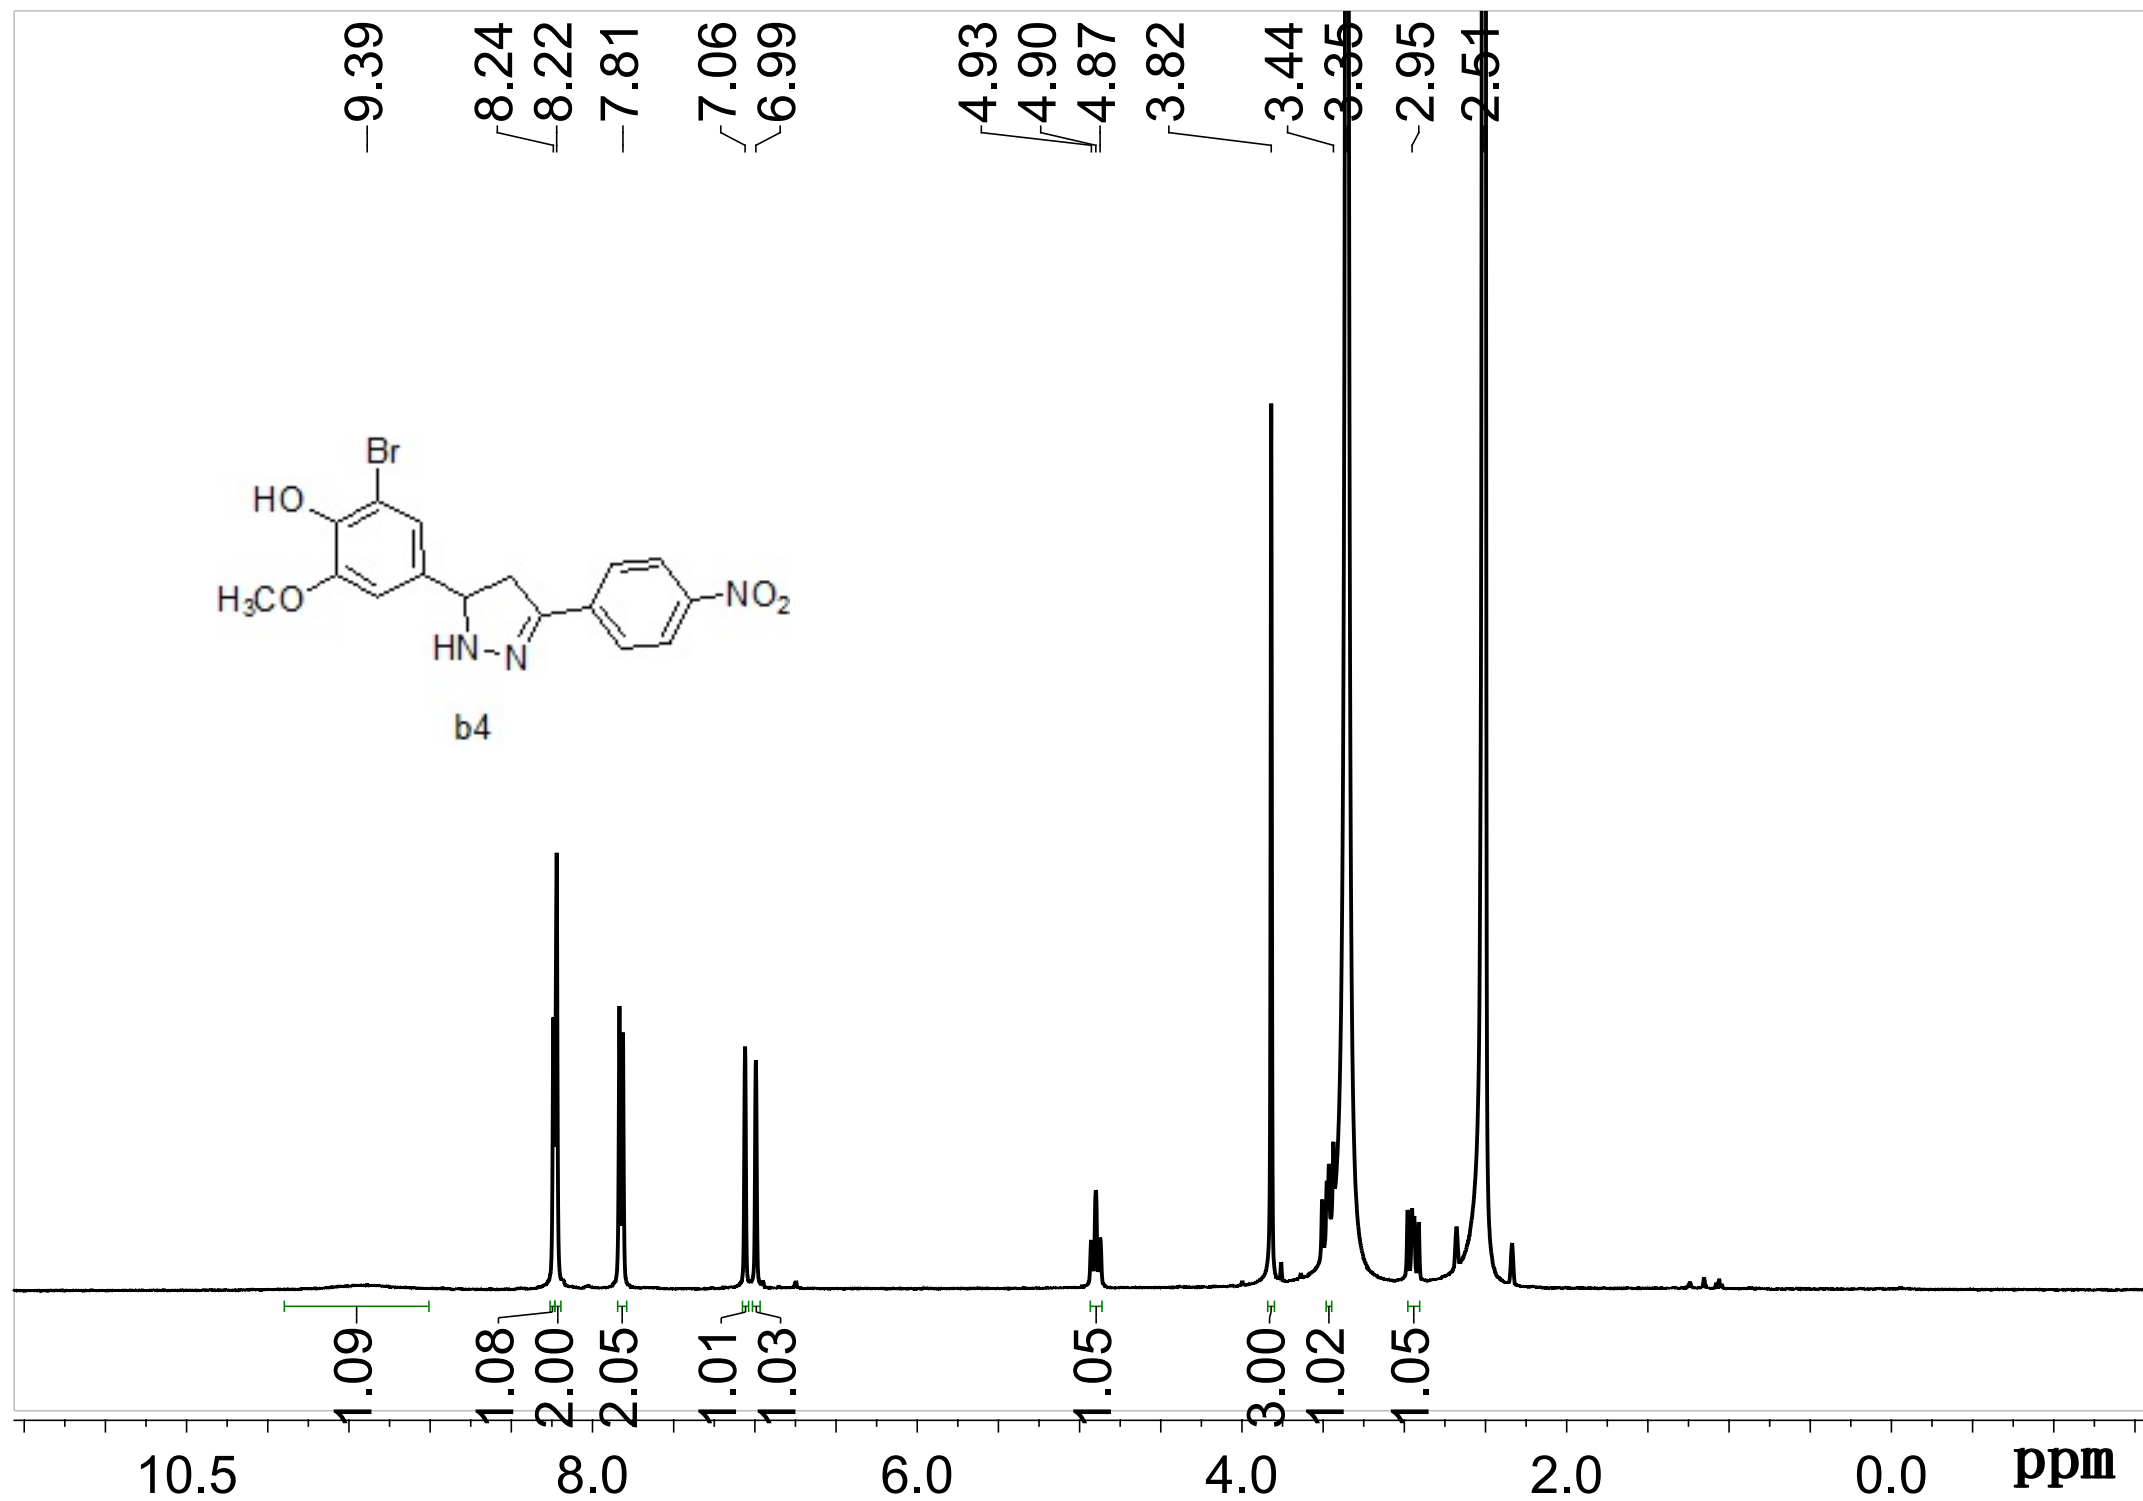

8.24  
8.22

7.83  
7.81

7.06  
6.99

4.93  
4.90  
4.87

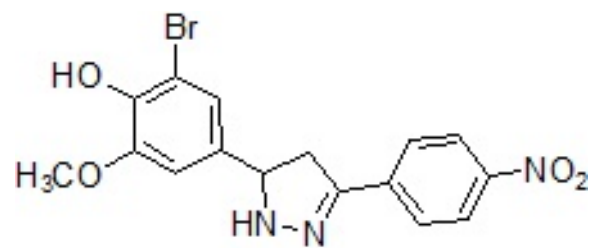

b4

1.08  
2.00

2.05

1.01  
1.03

1.05

ppm

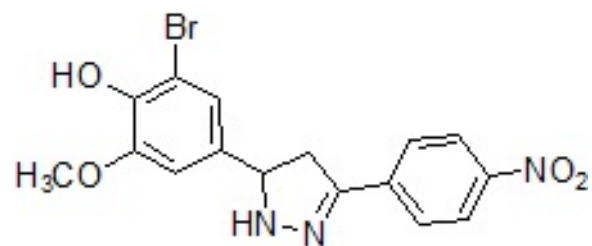

b4

3.82

3.48

3.46

3.44

3.35

2.98

2.95

2.94

2.91

3.00

1.02

1.05

4.00

3.55

3.10

ppm

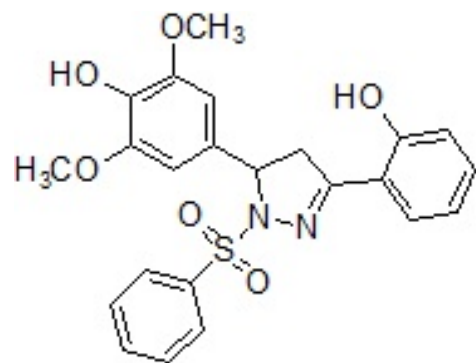

b5

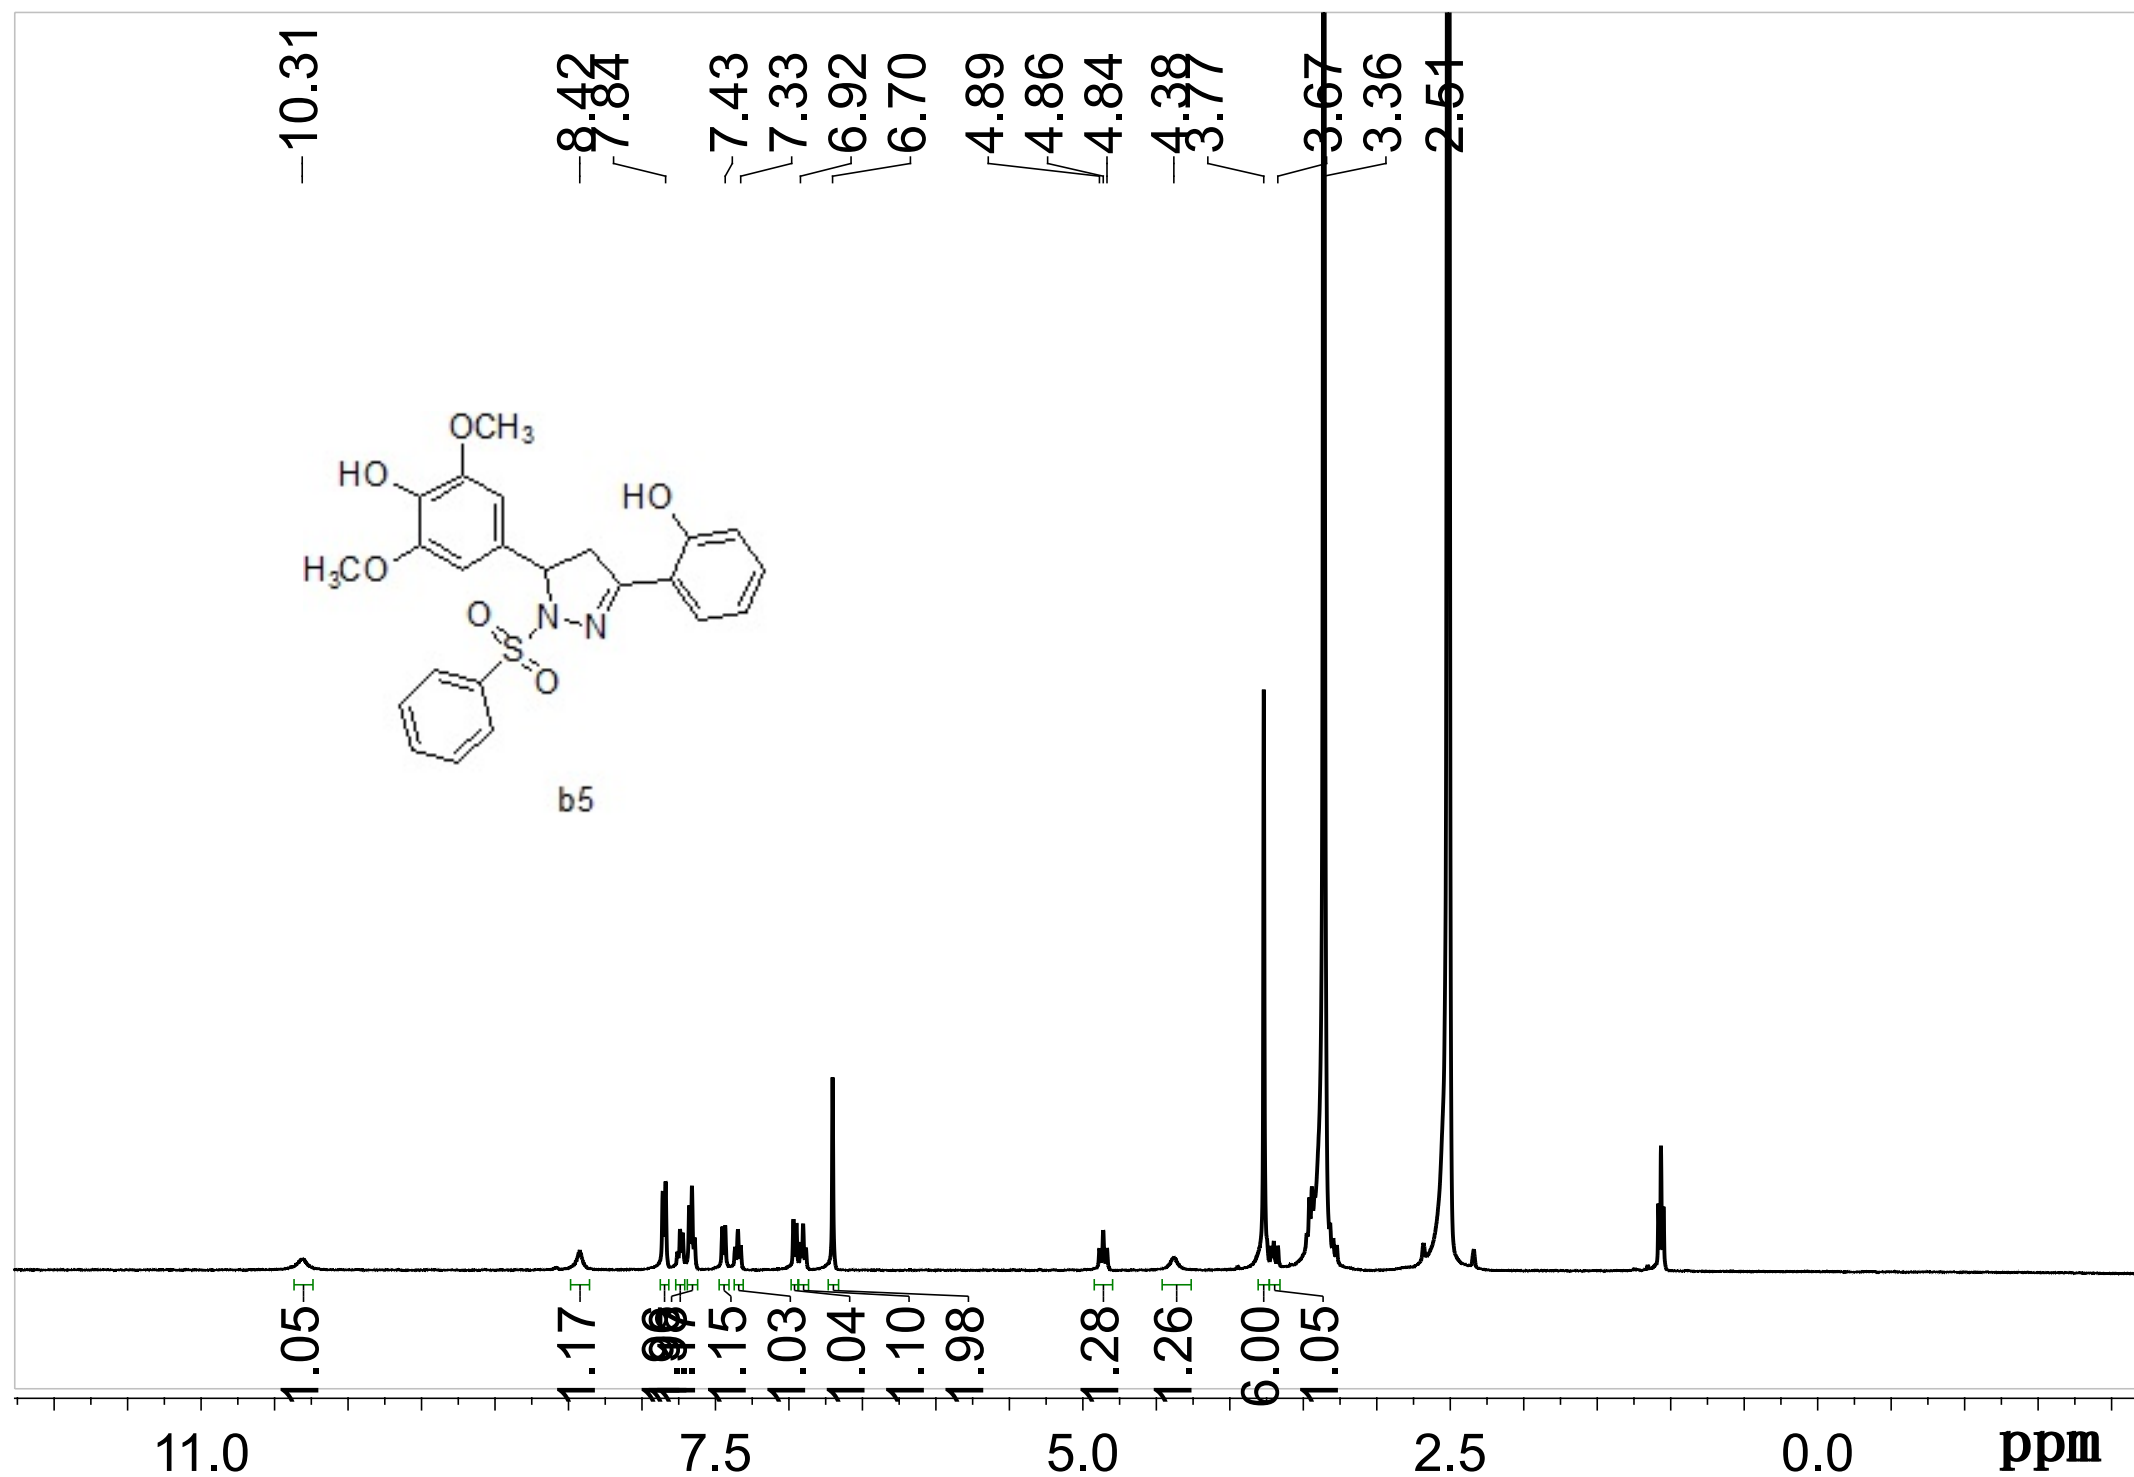

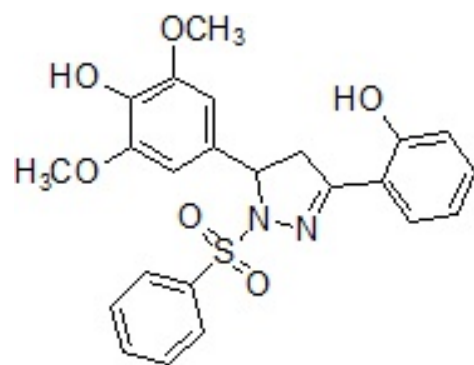

**b5**

7.86  
7.84  
7.74  
7.72  
7.68  
7.66  
7.64  
7.45  
7.43  
7.37  
7.35  
7.33  
6.97  
6.95  
6.92  
6.90  
6.89  
6.70

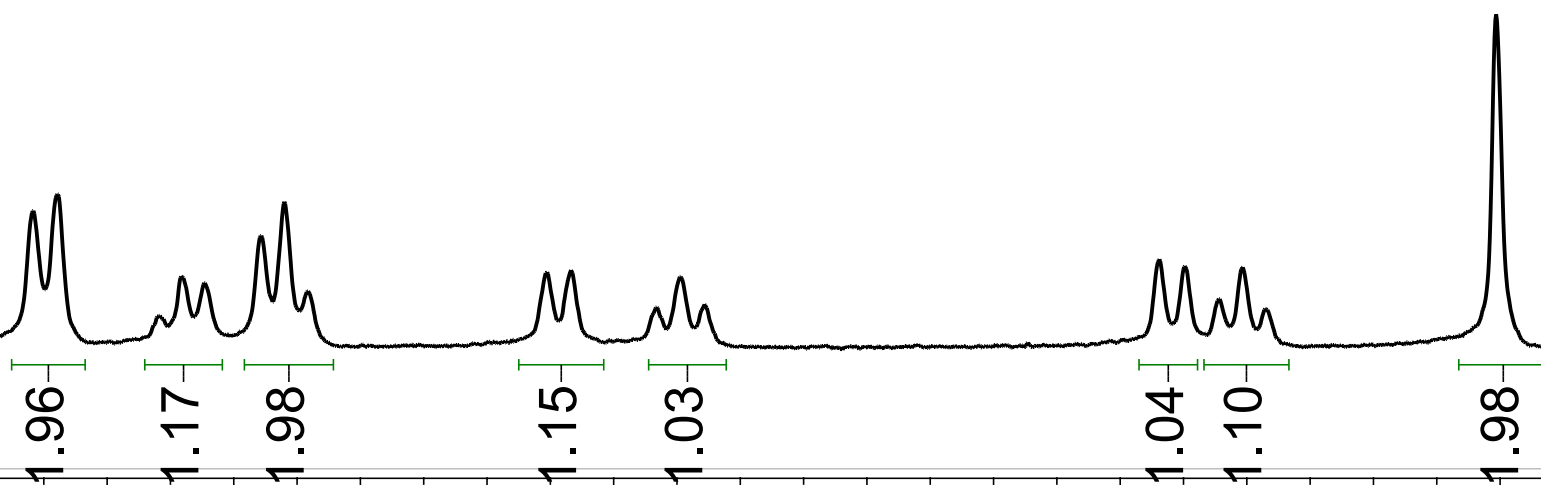

8.0 7.8 7.6 7.4 7.2 7.0 6.8 6.6 ppm



**b5**

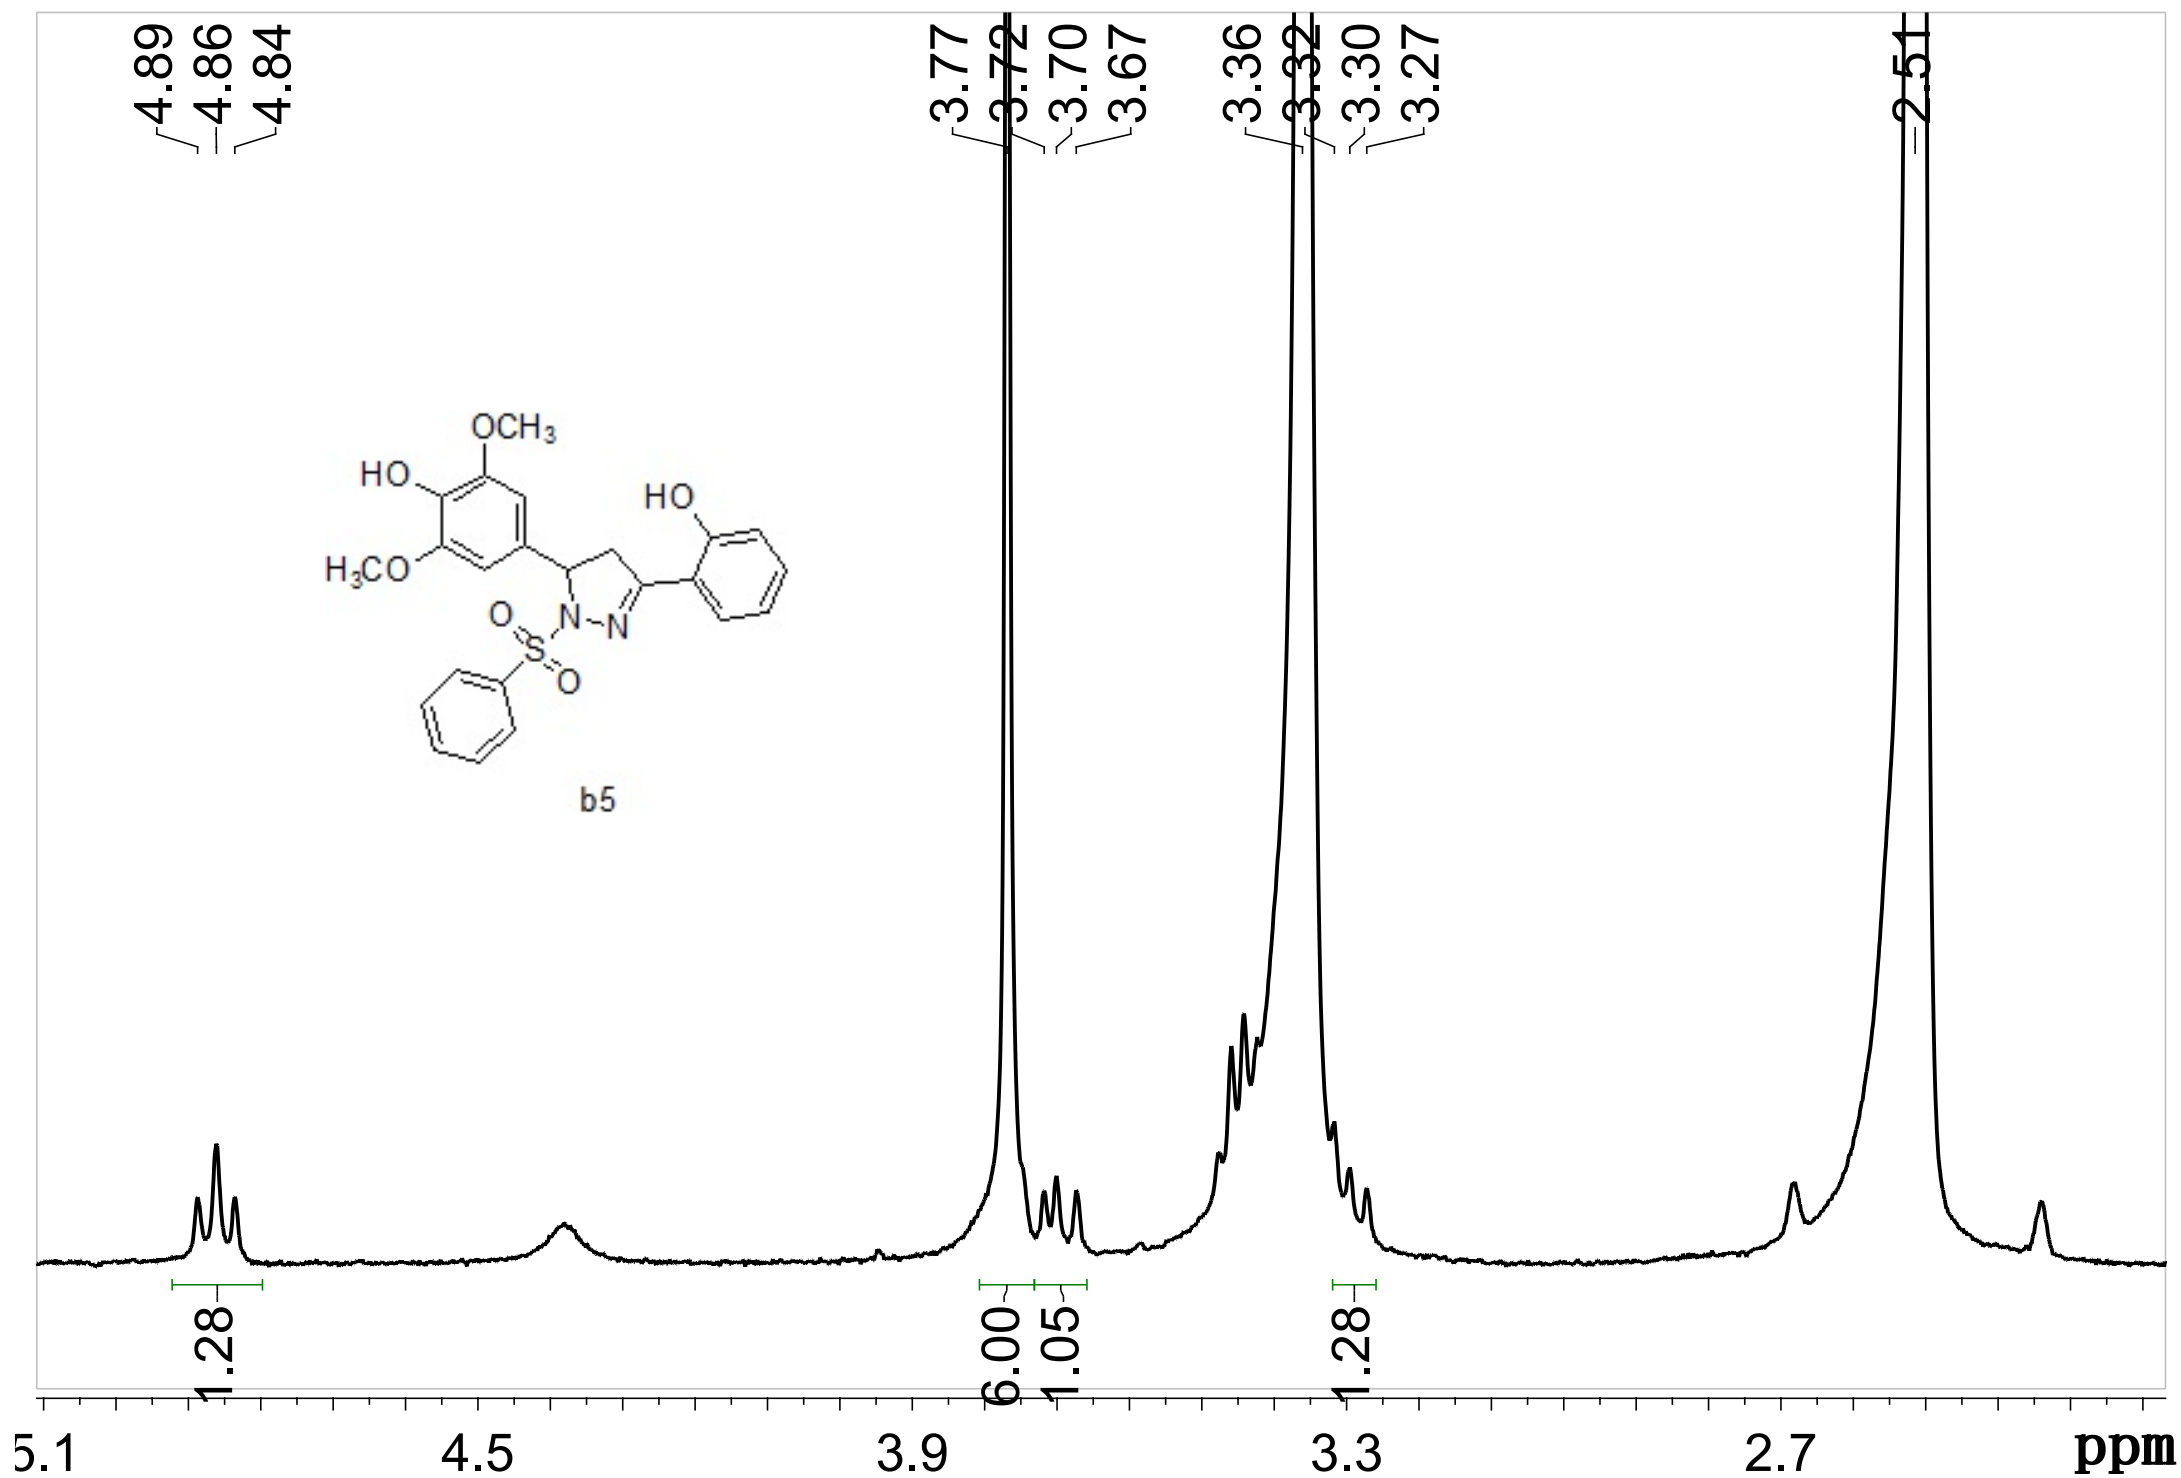



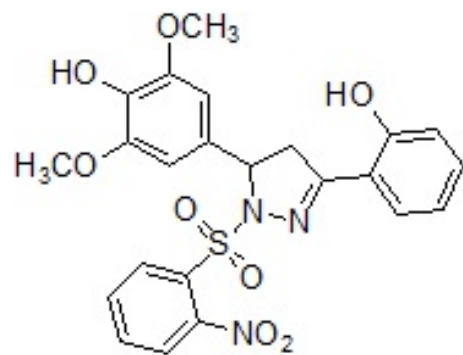

**b6**

10.16

8.45

7.95

7.84

7.38

6.96

6.67

5.24

5.22

3.94

3.76

3.44

3.42

3.37

2.51

1.02

2.05

1.02

1.07

1.03

1.04

2.04

2.01

1.01

1.07

6.00

0.90

11.0

7.5

5.0

2.5

0.0

ppm

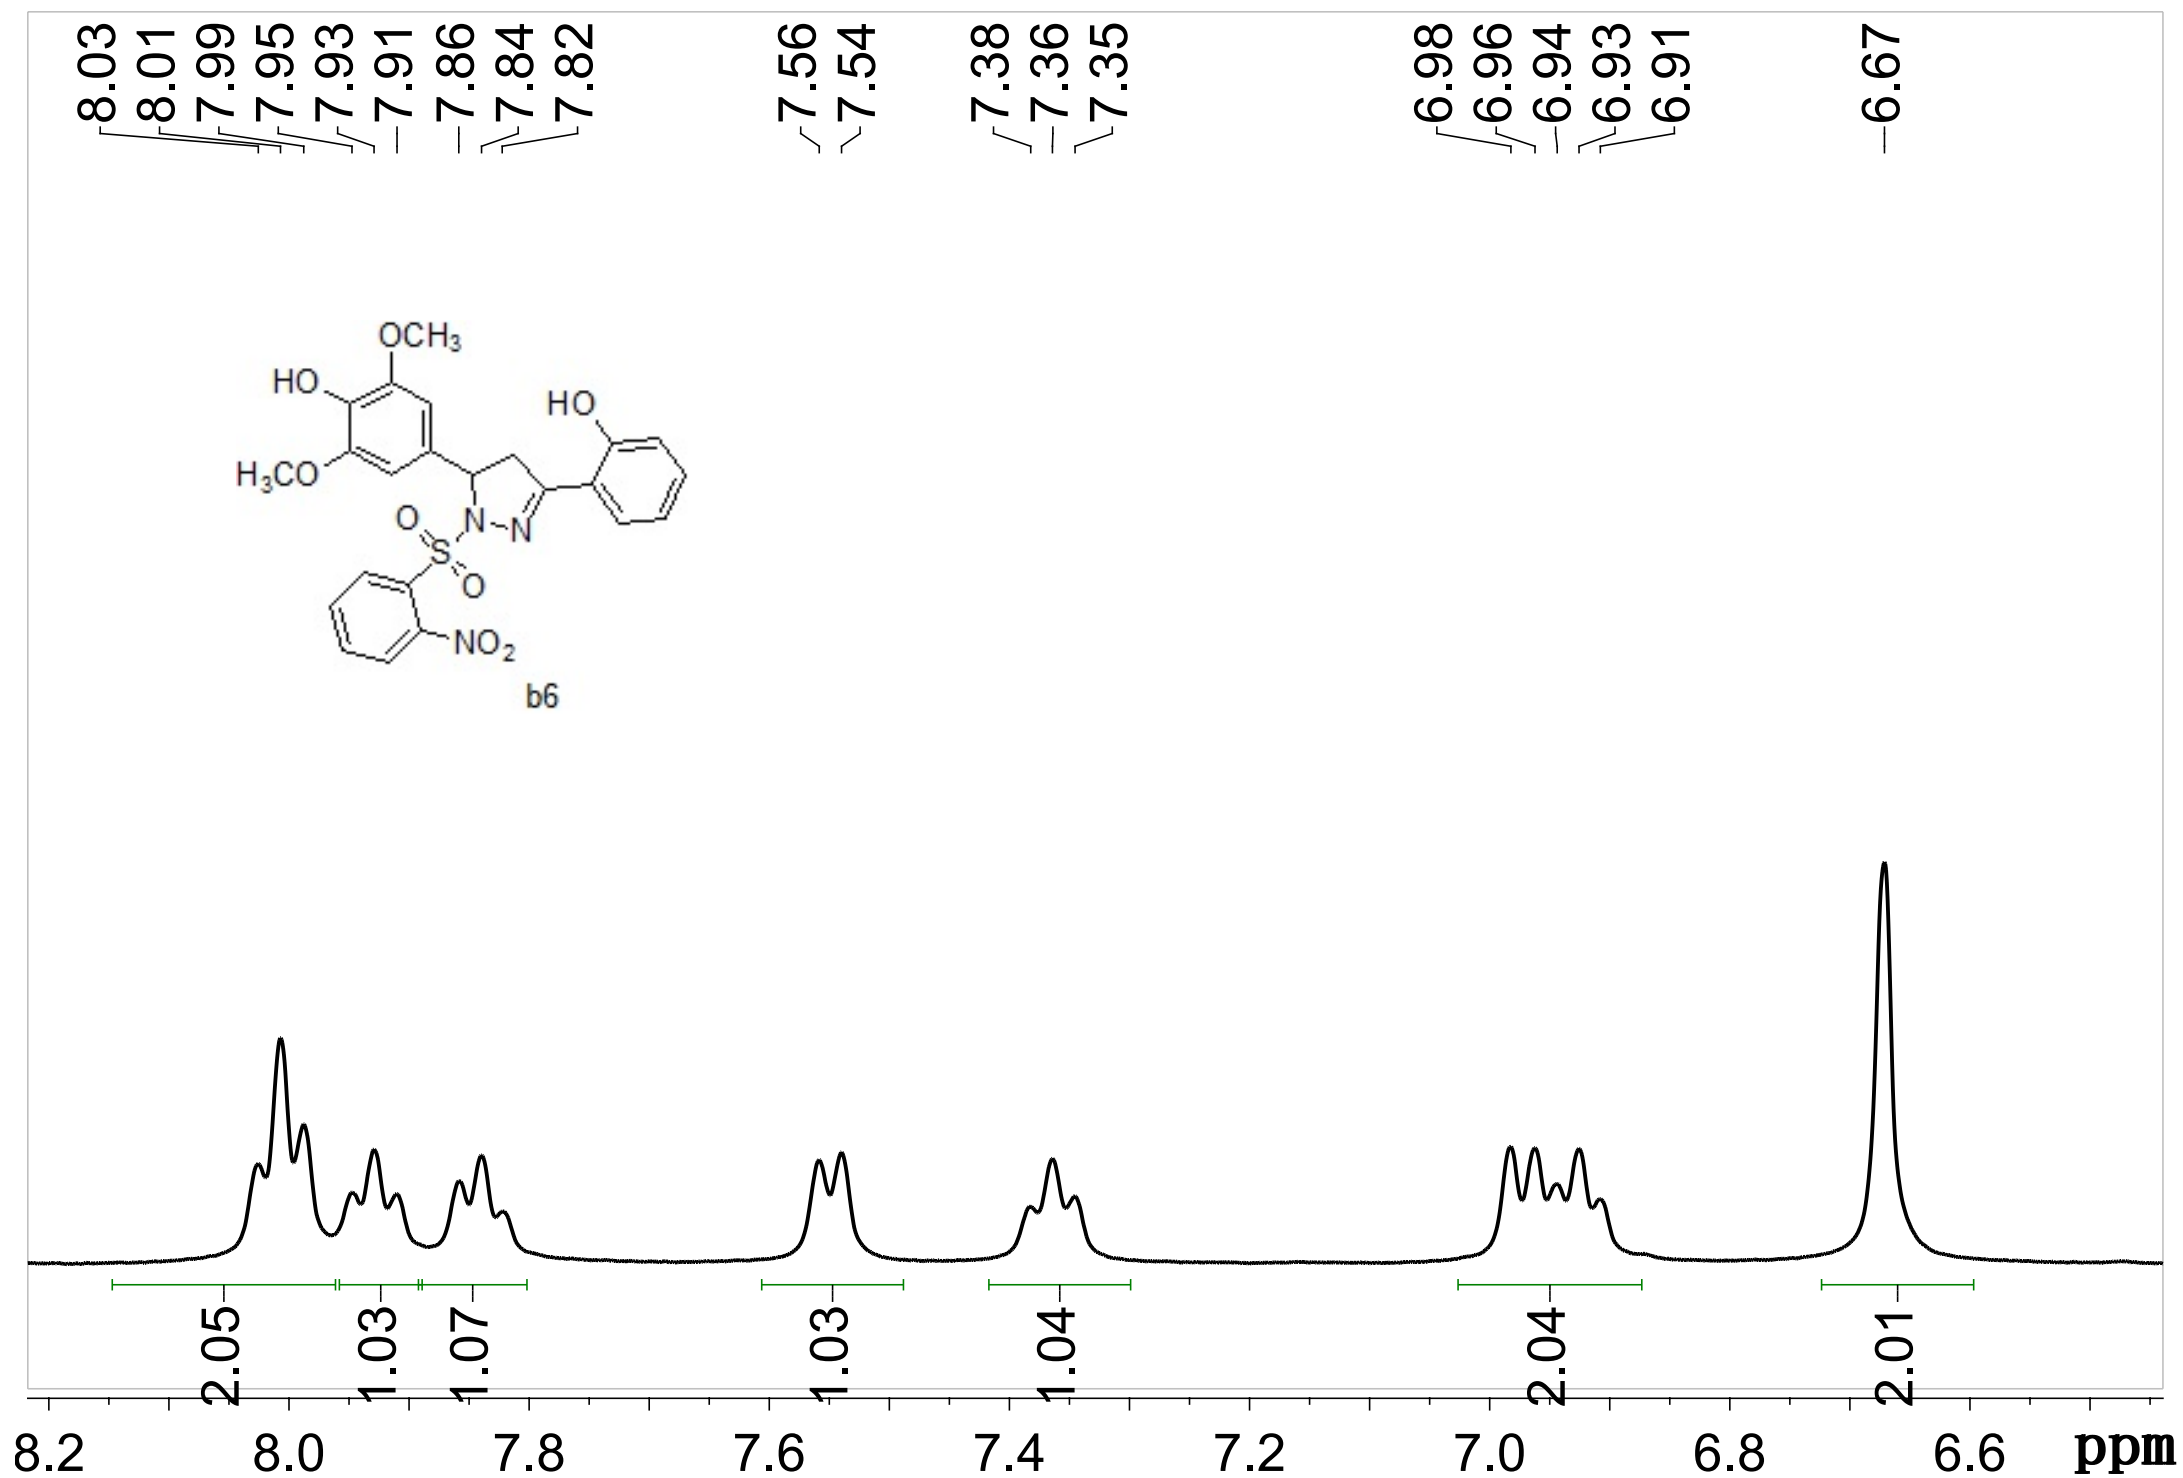



b6

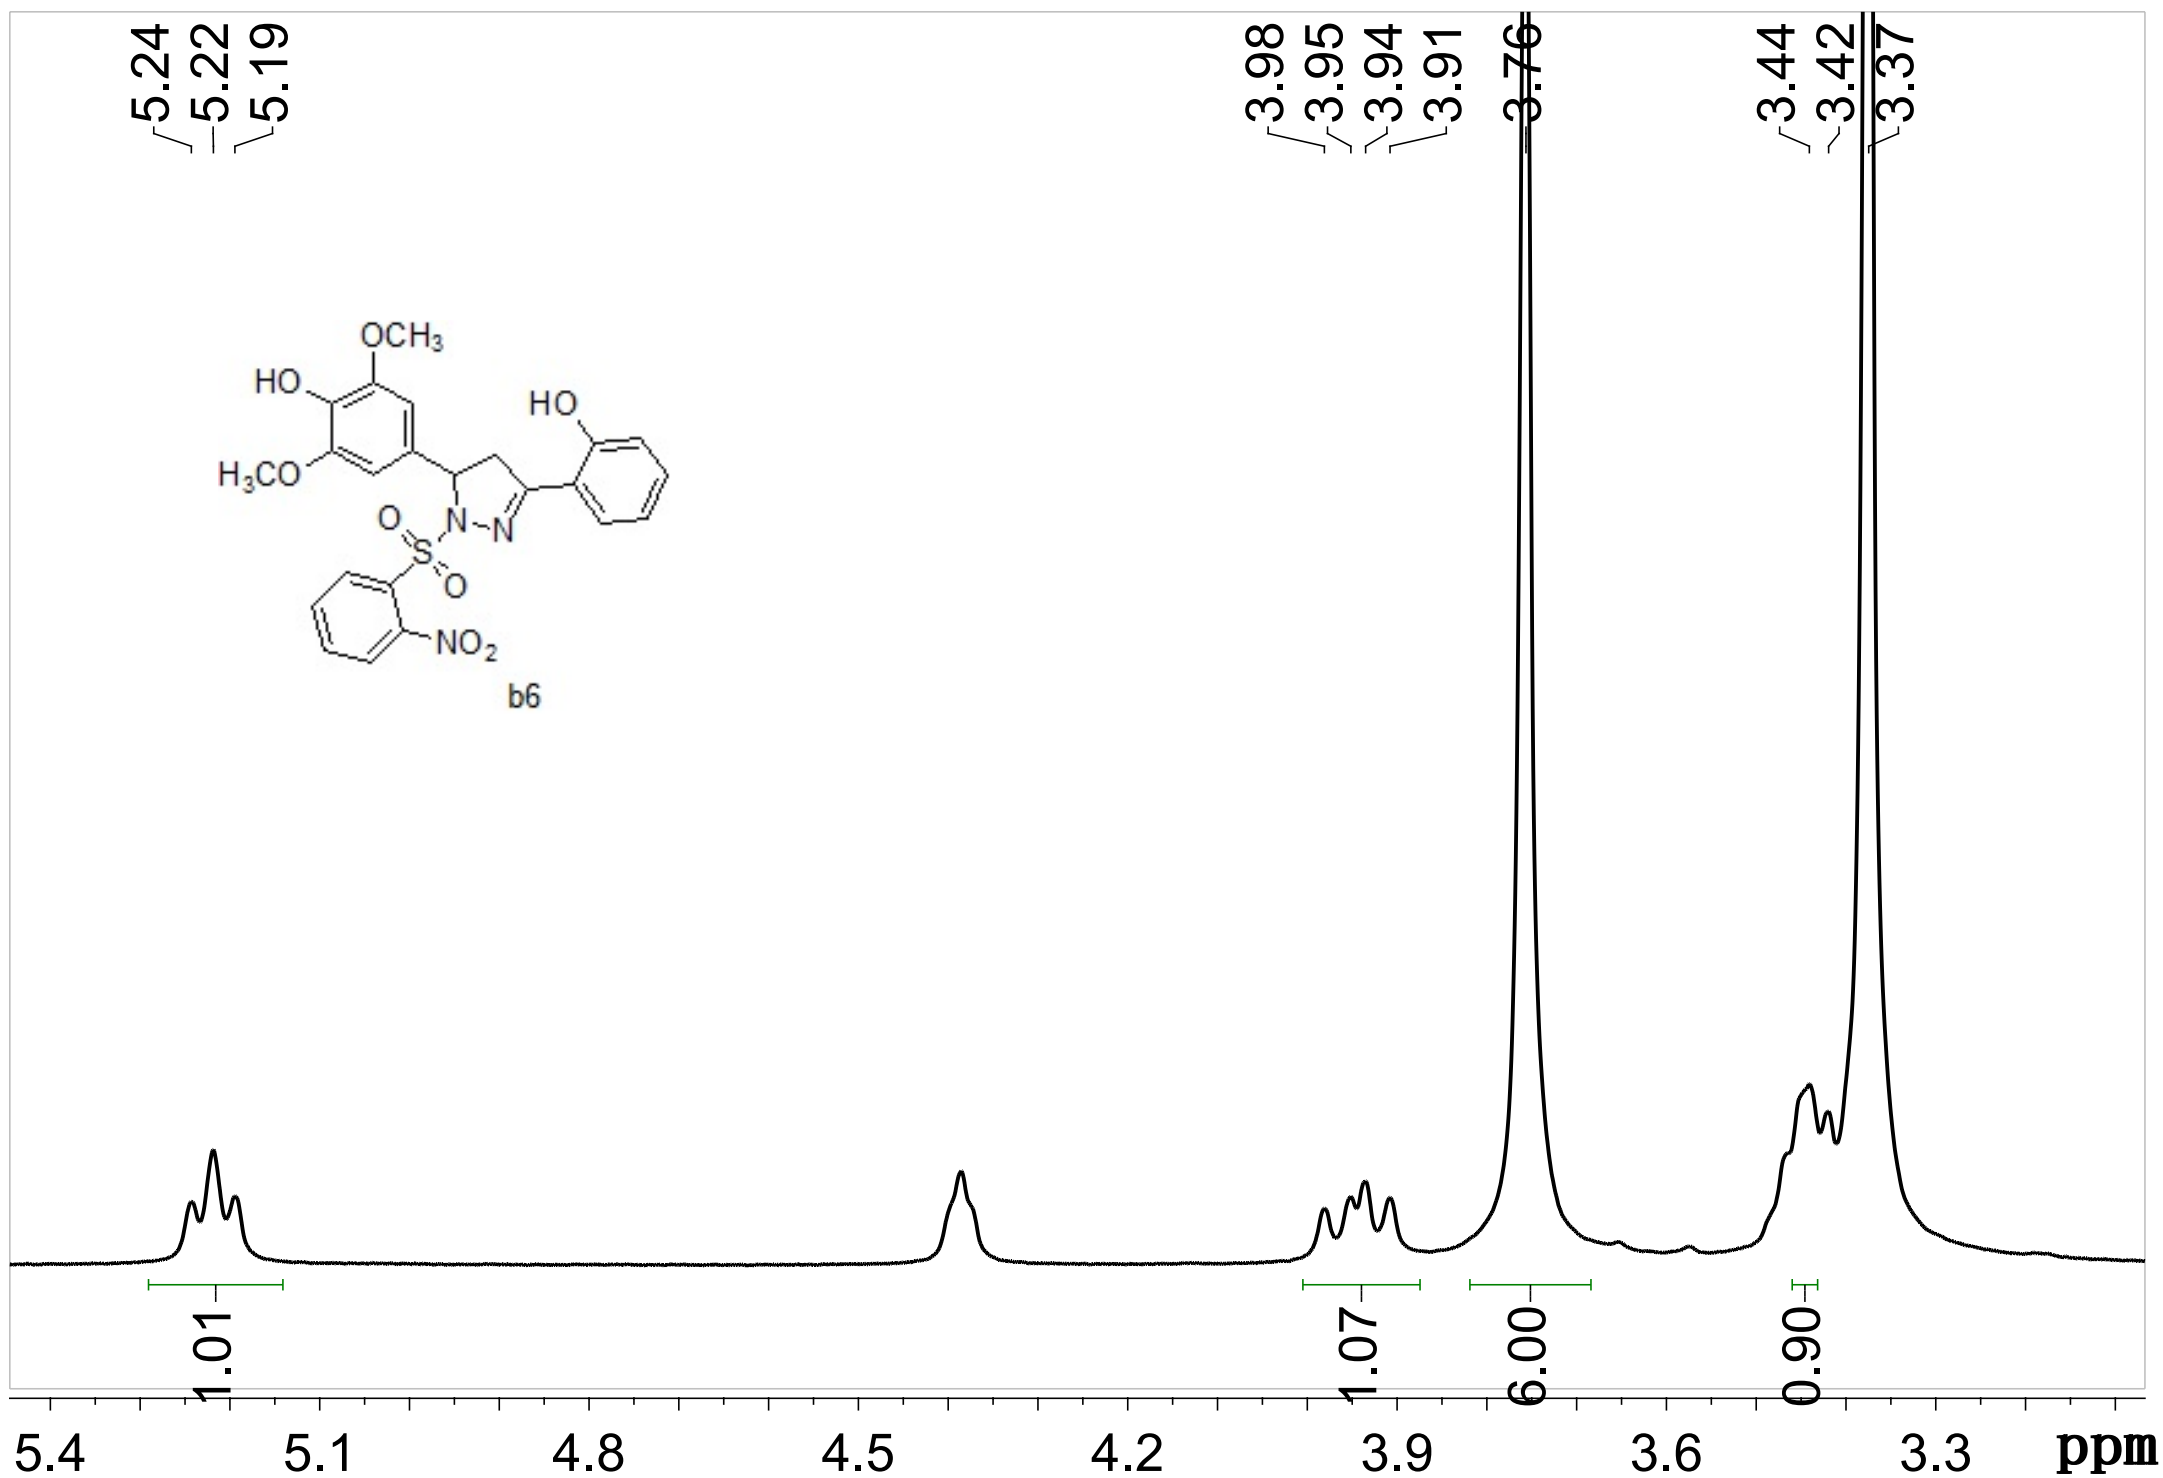

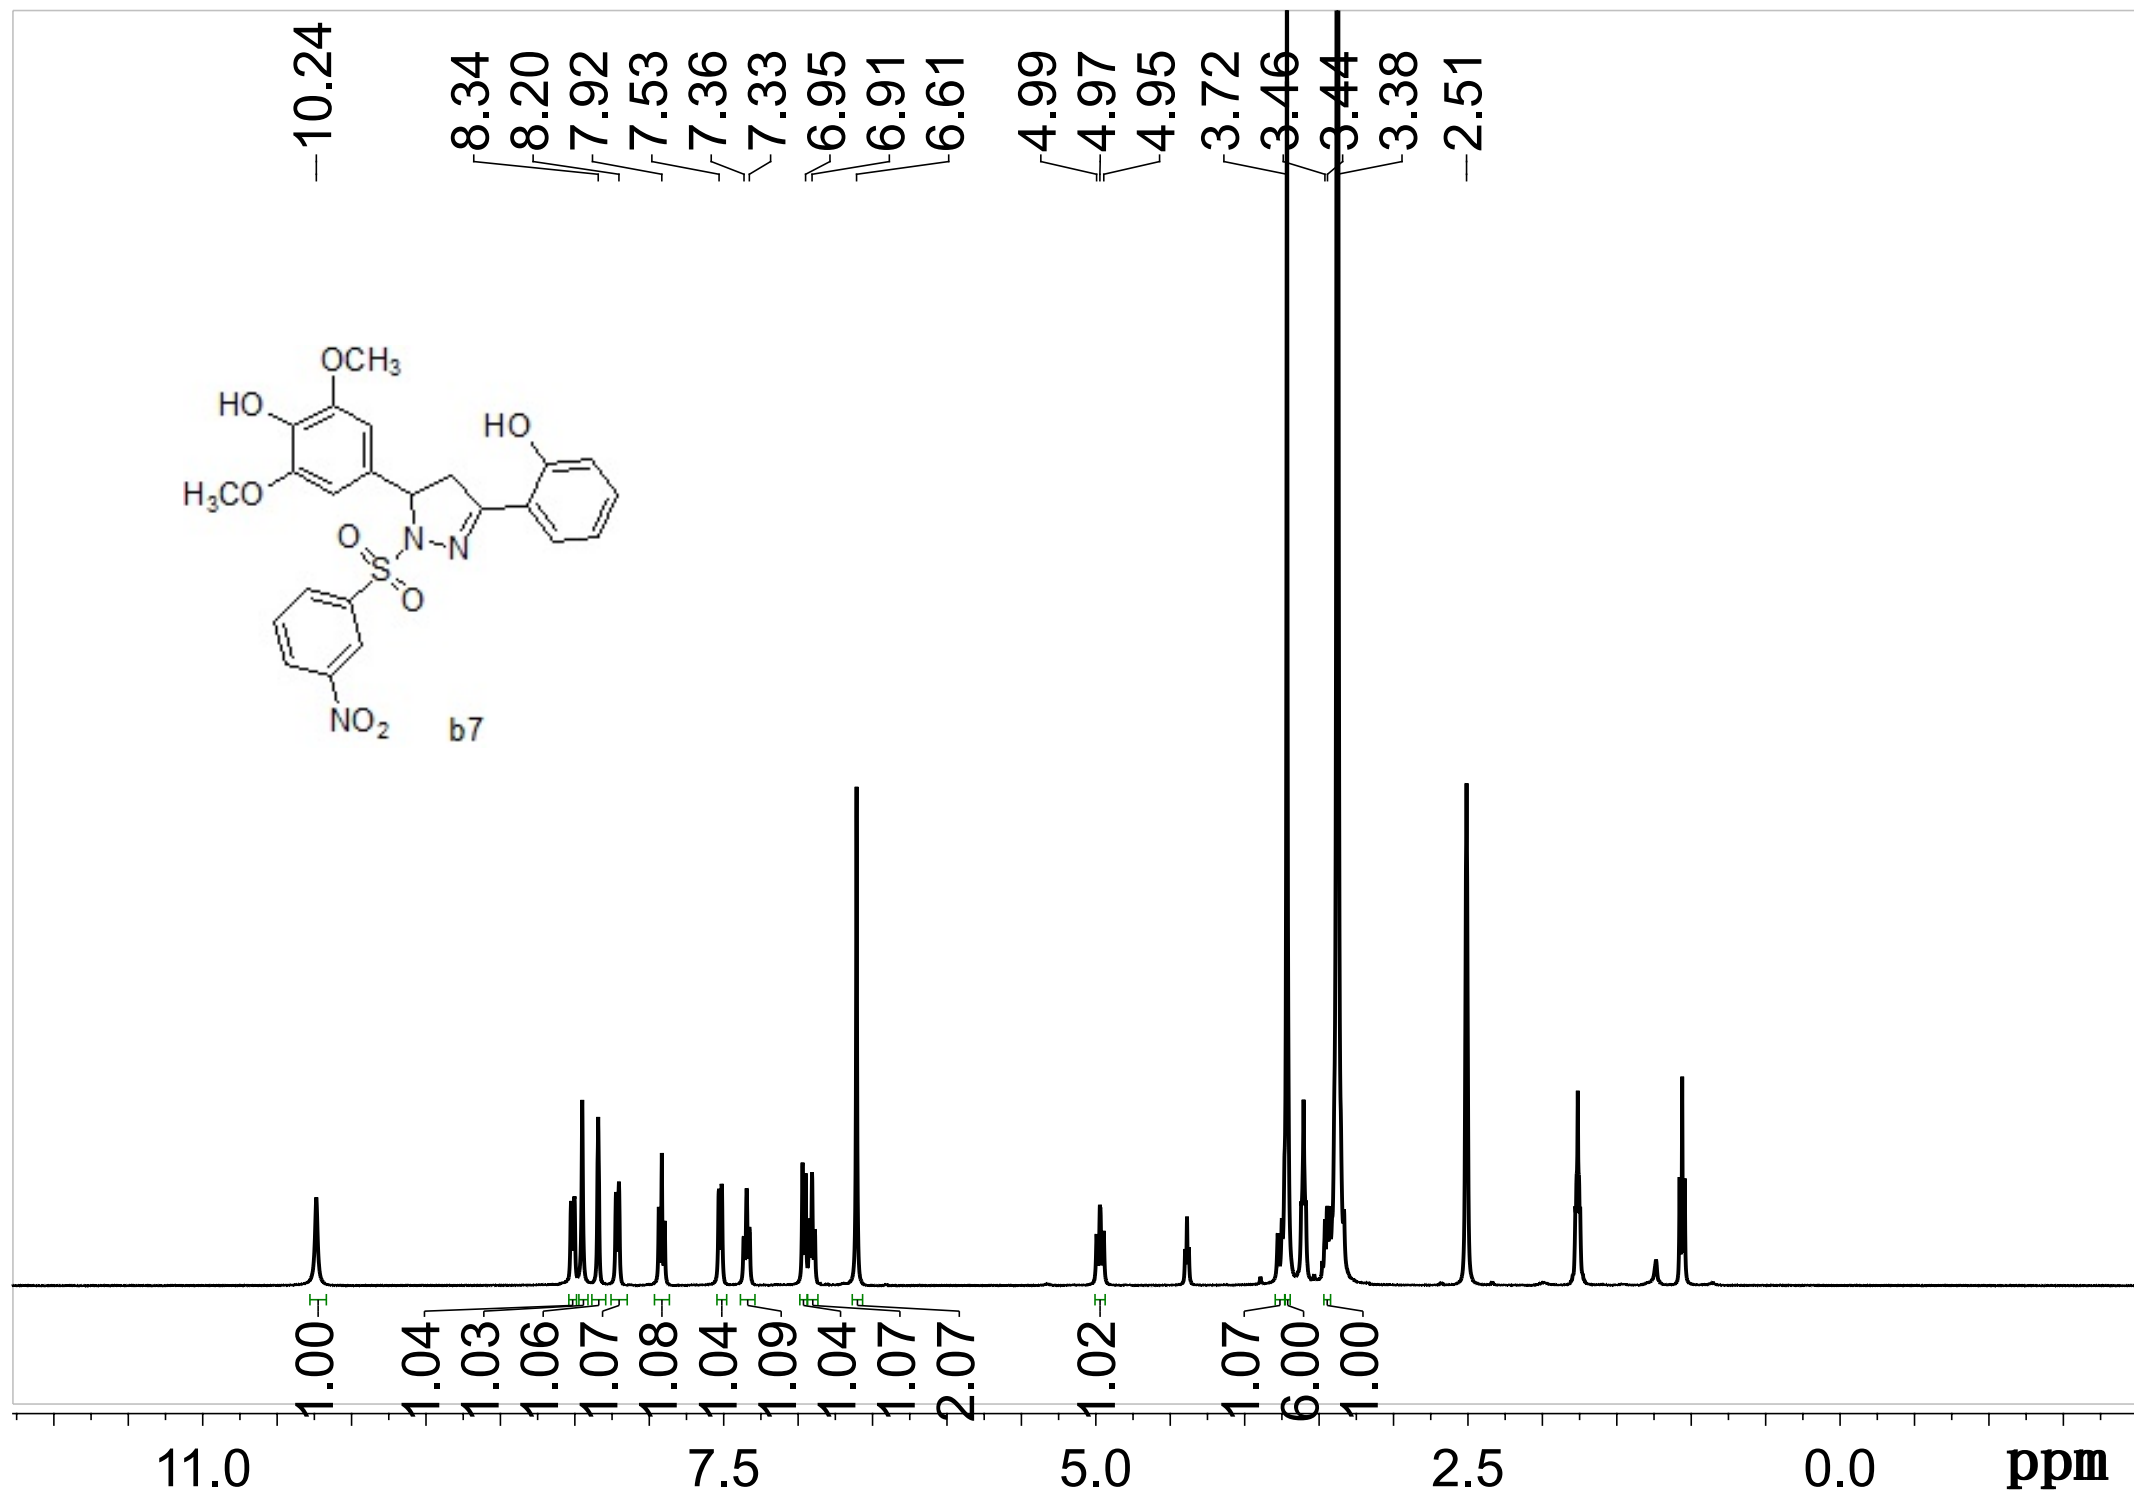

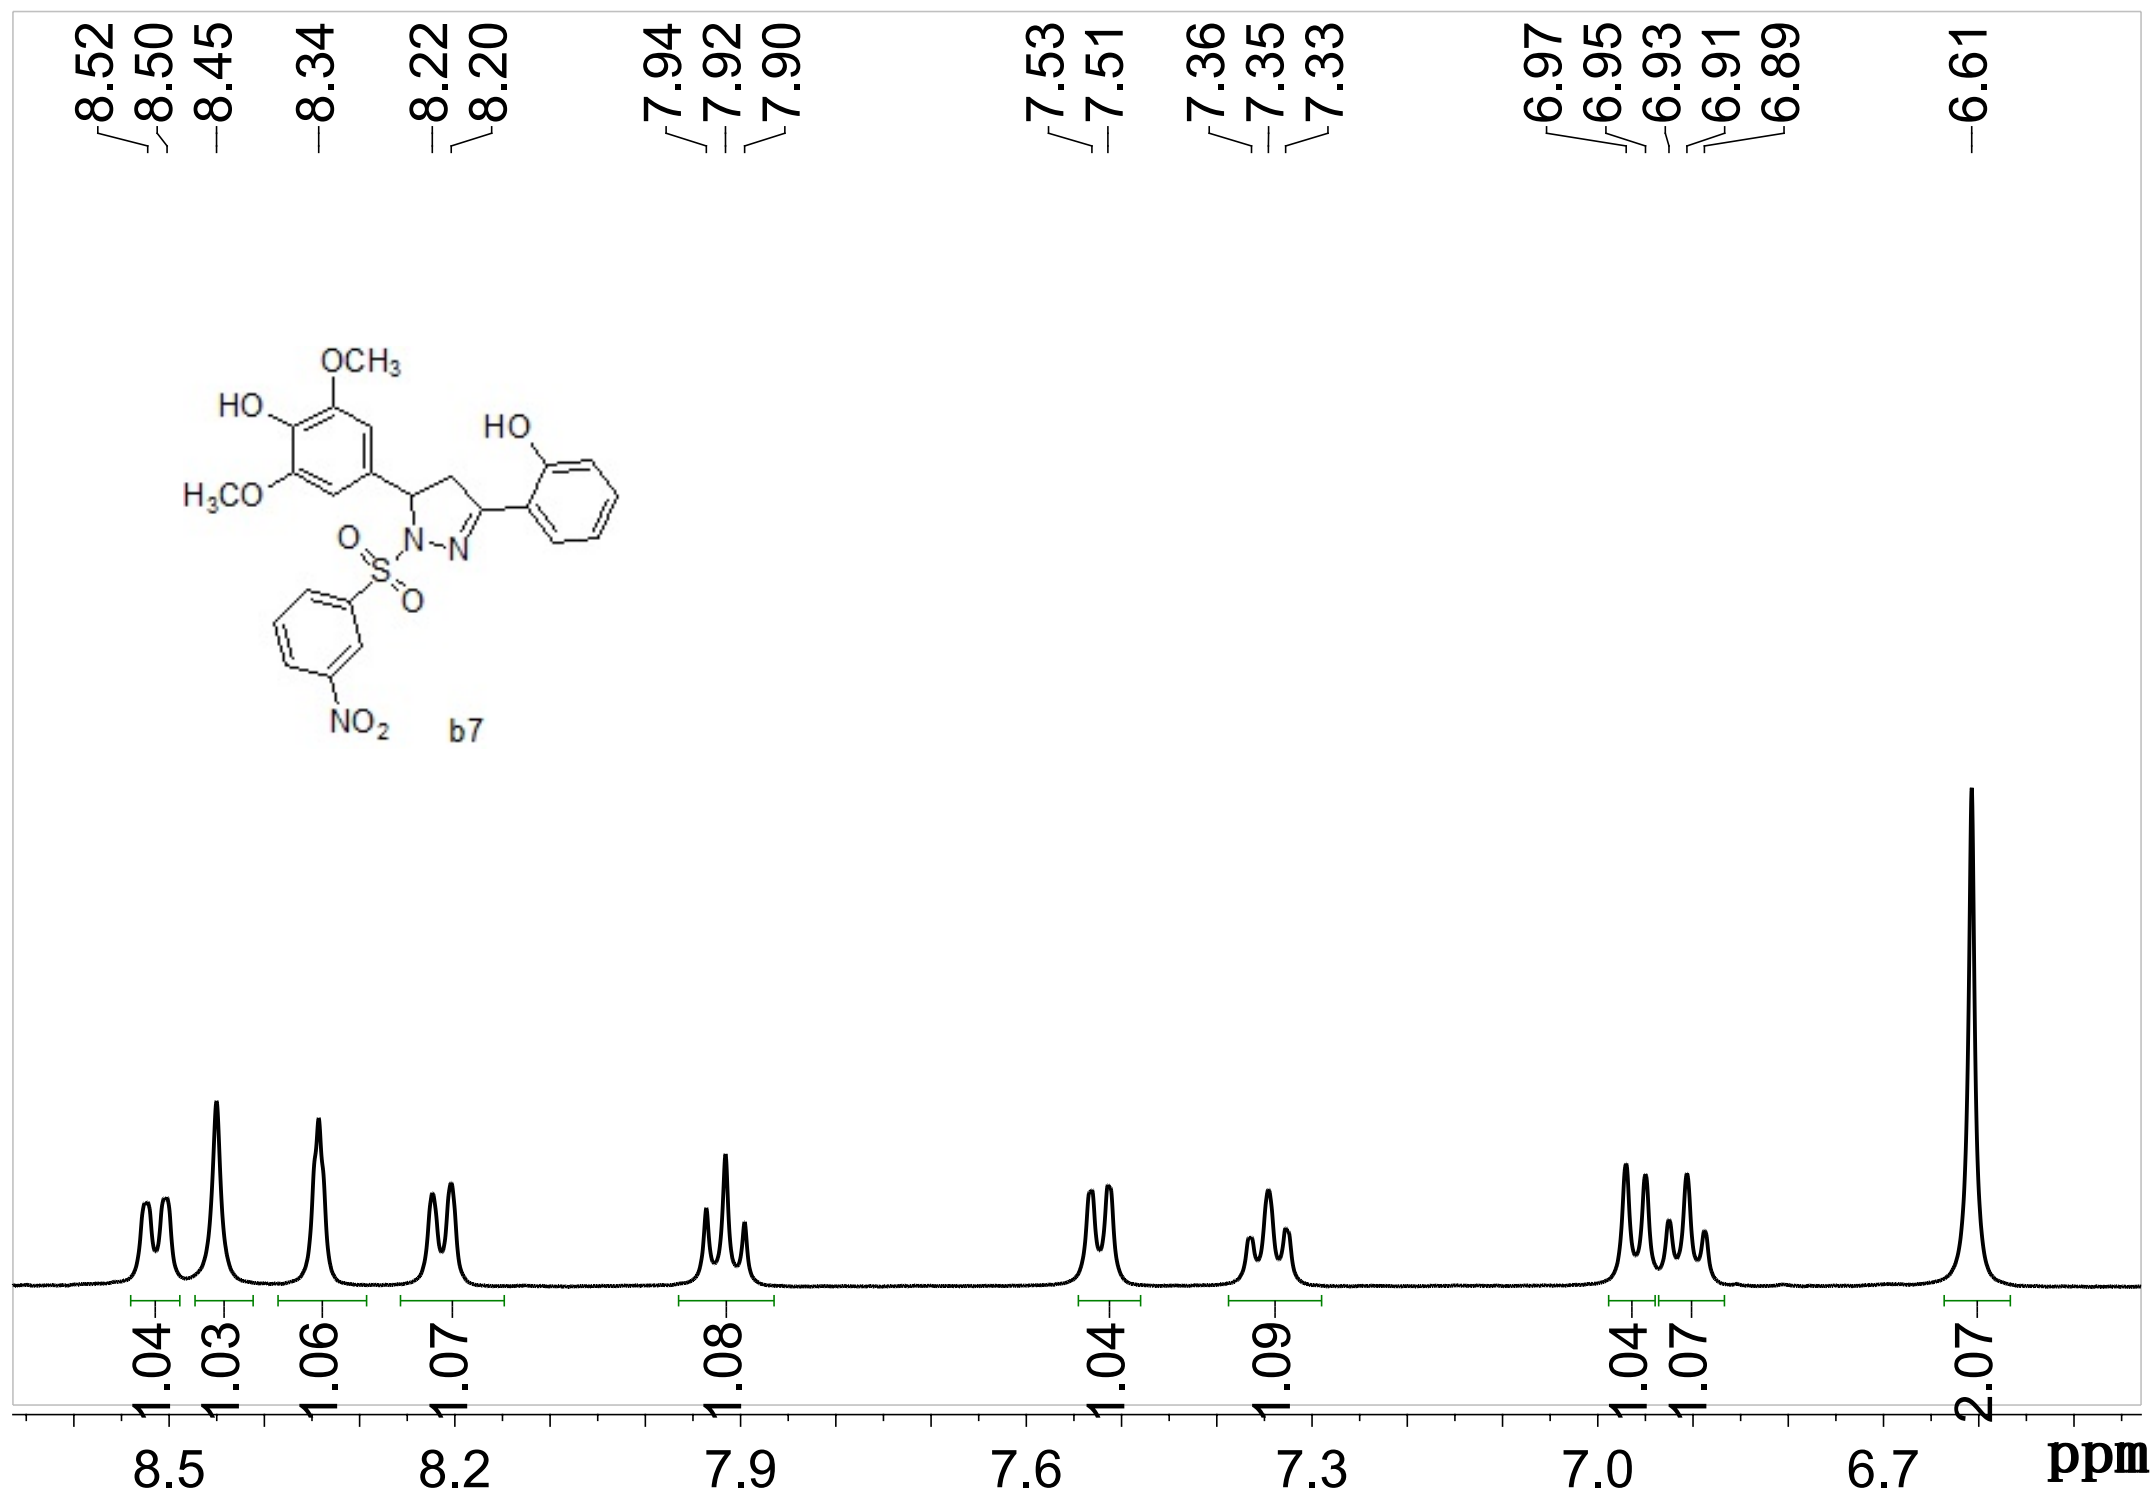

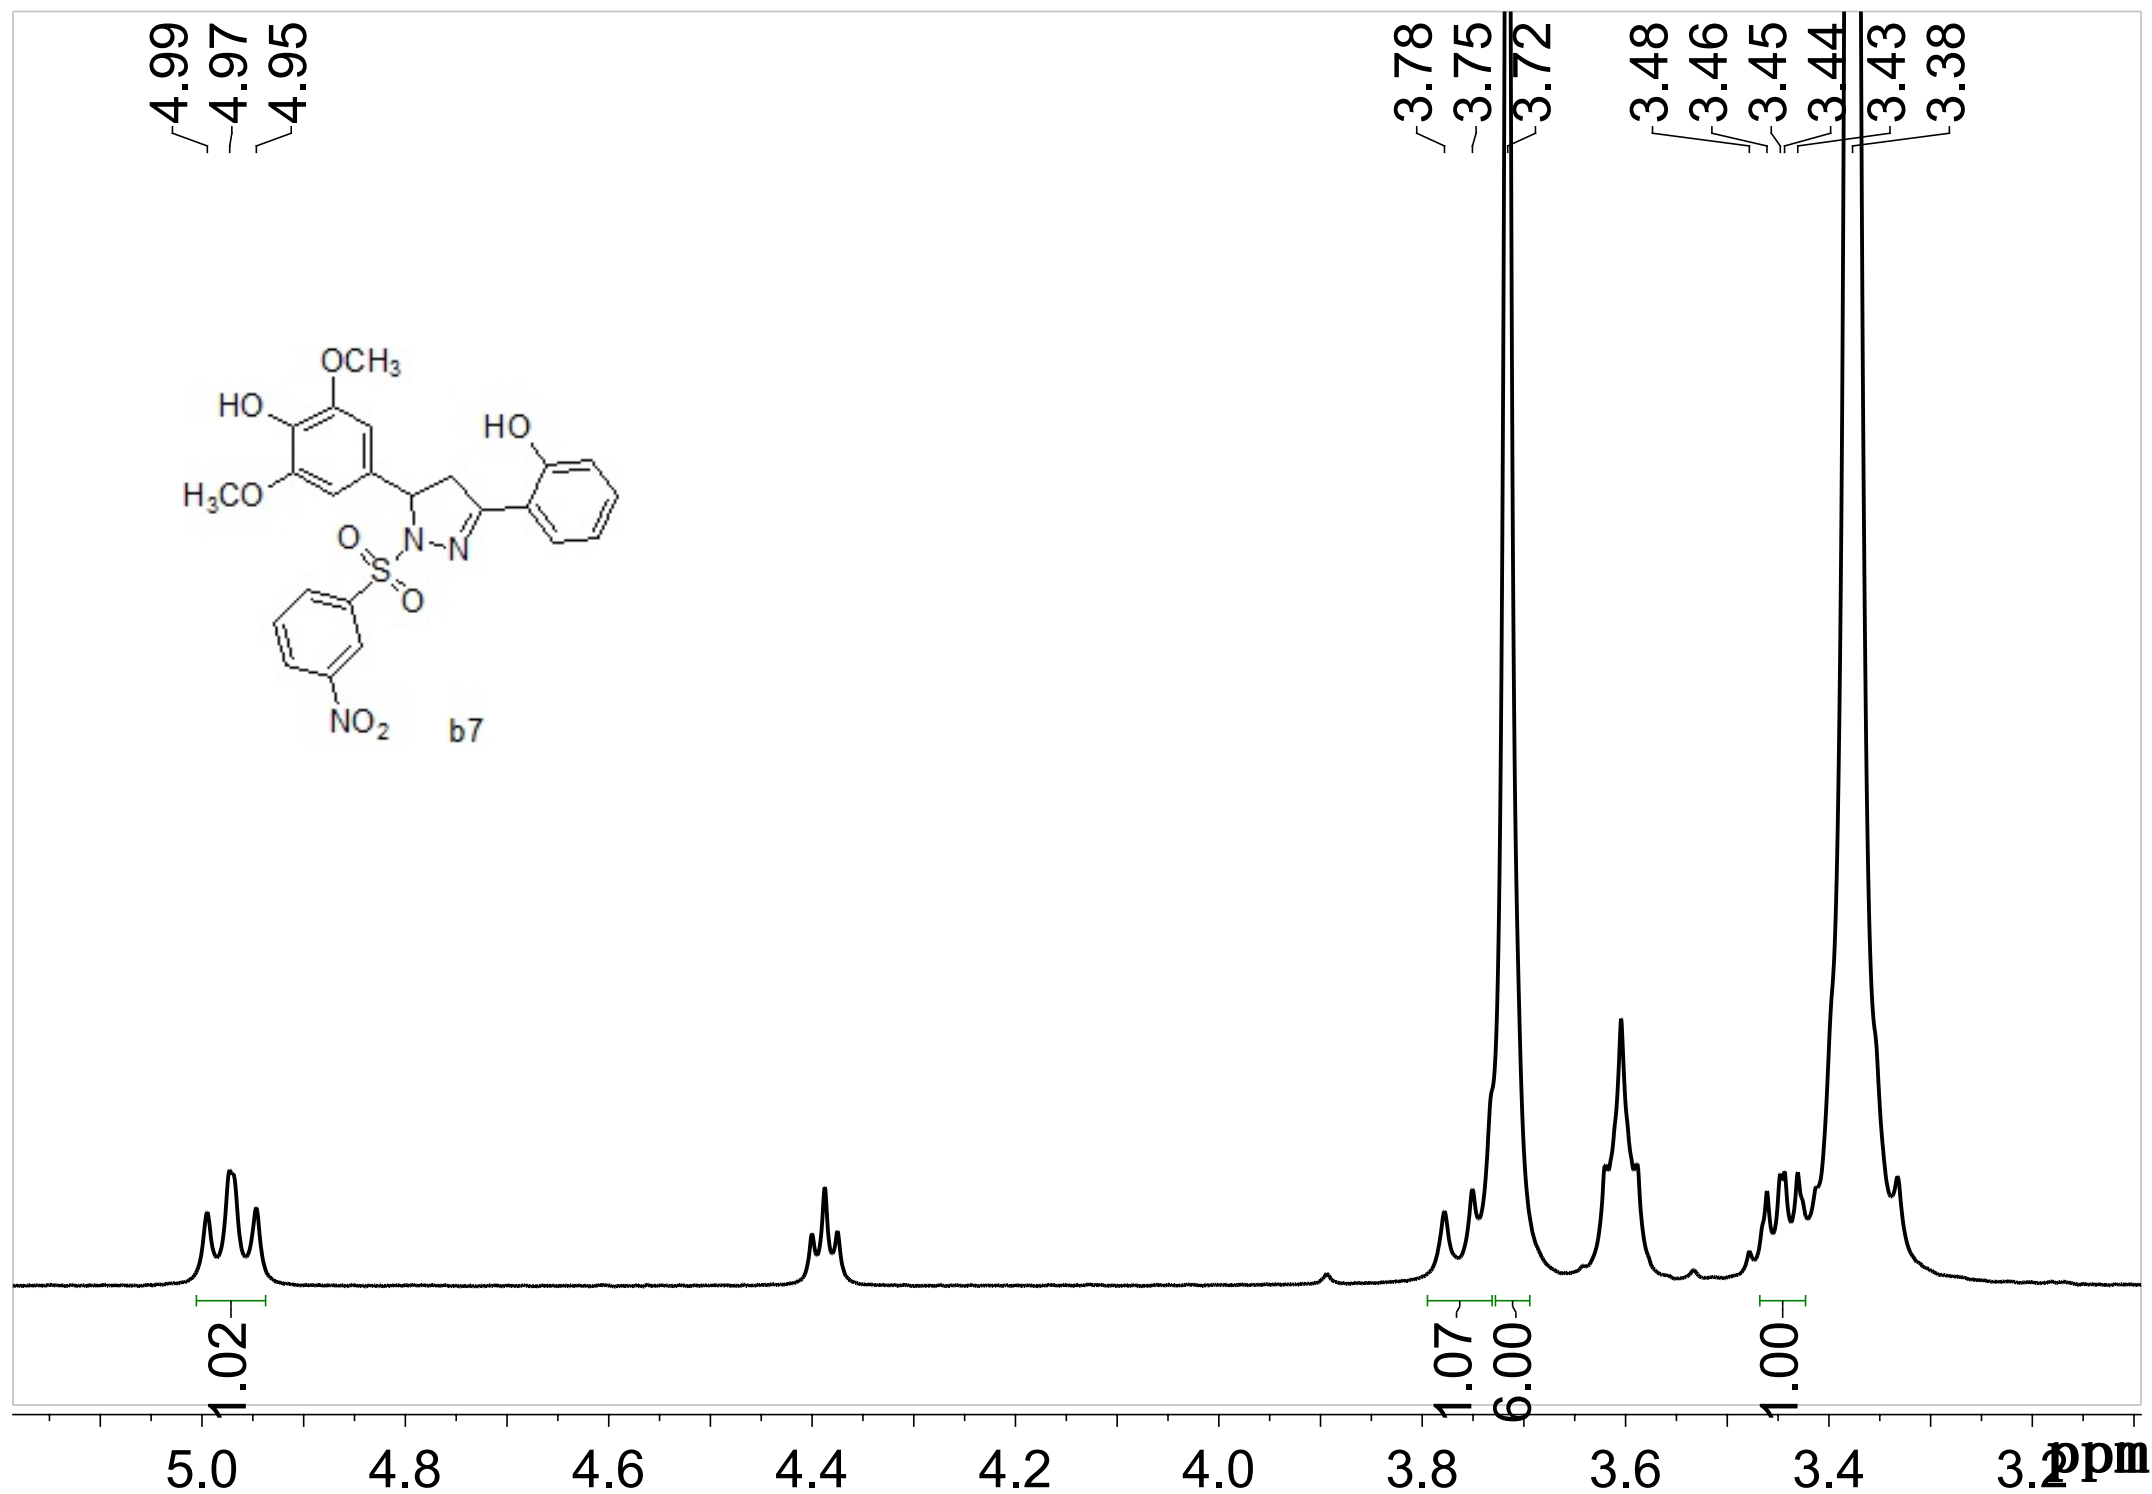

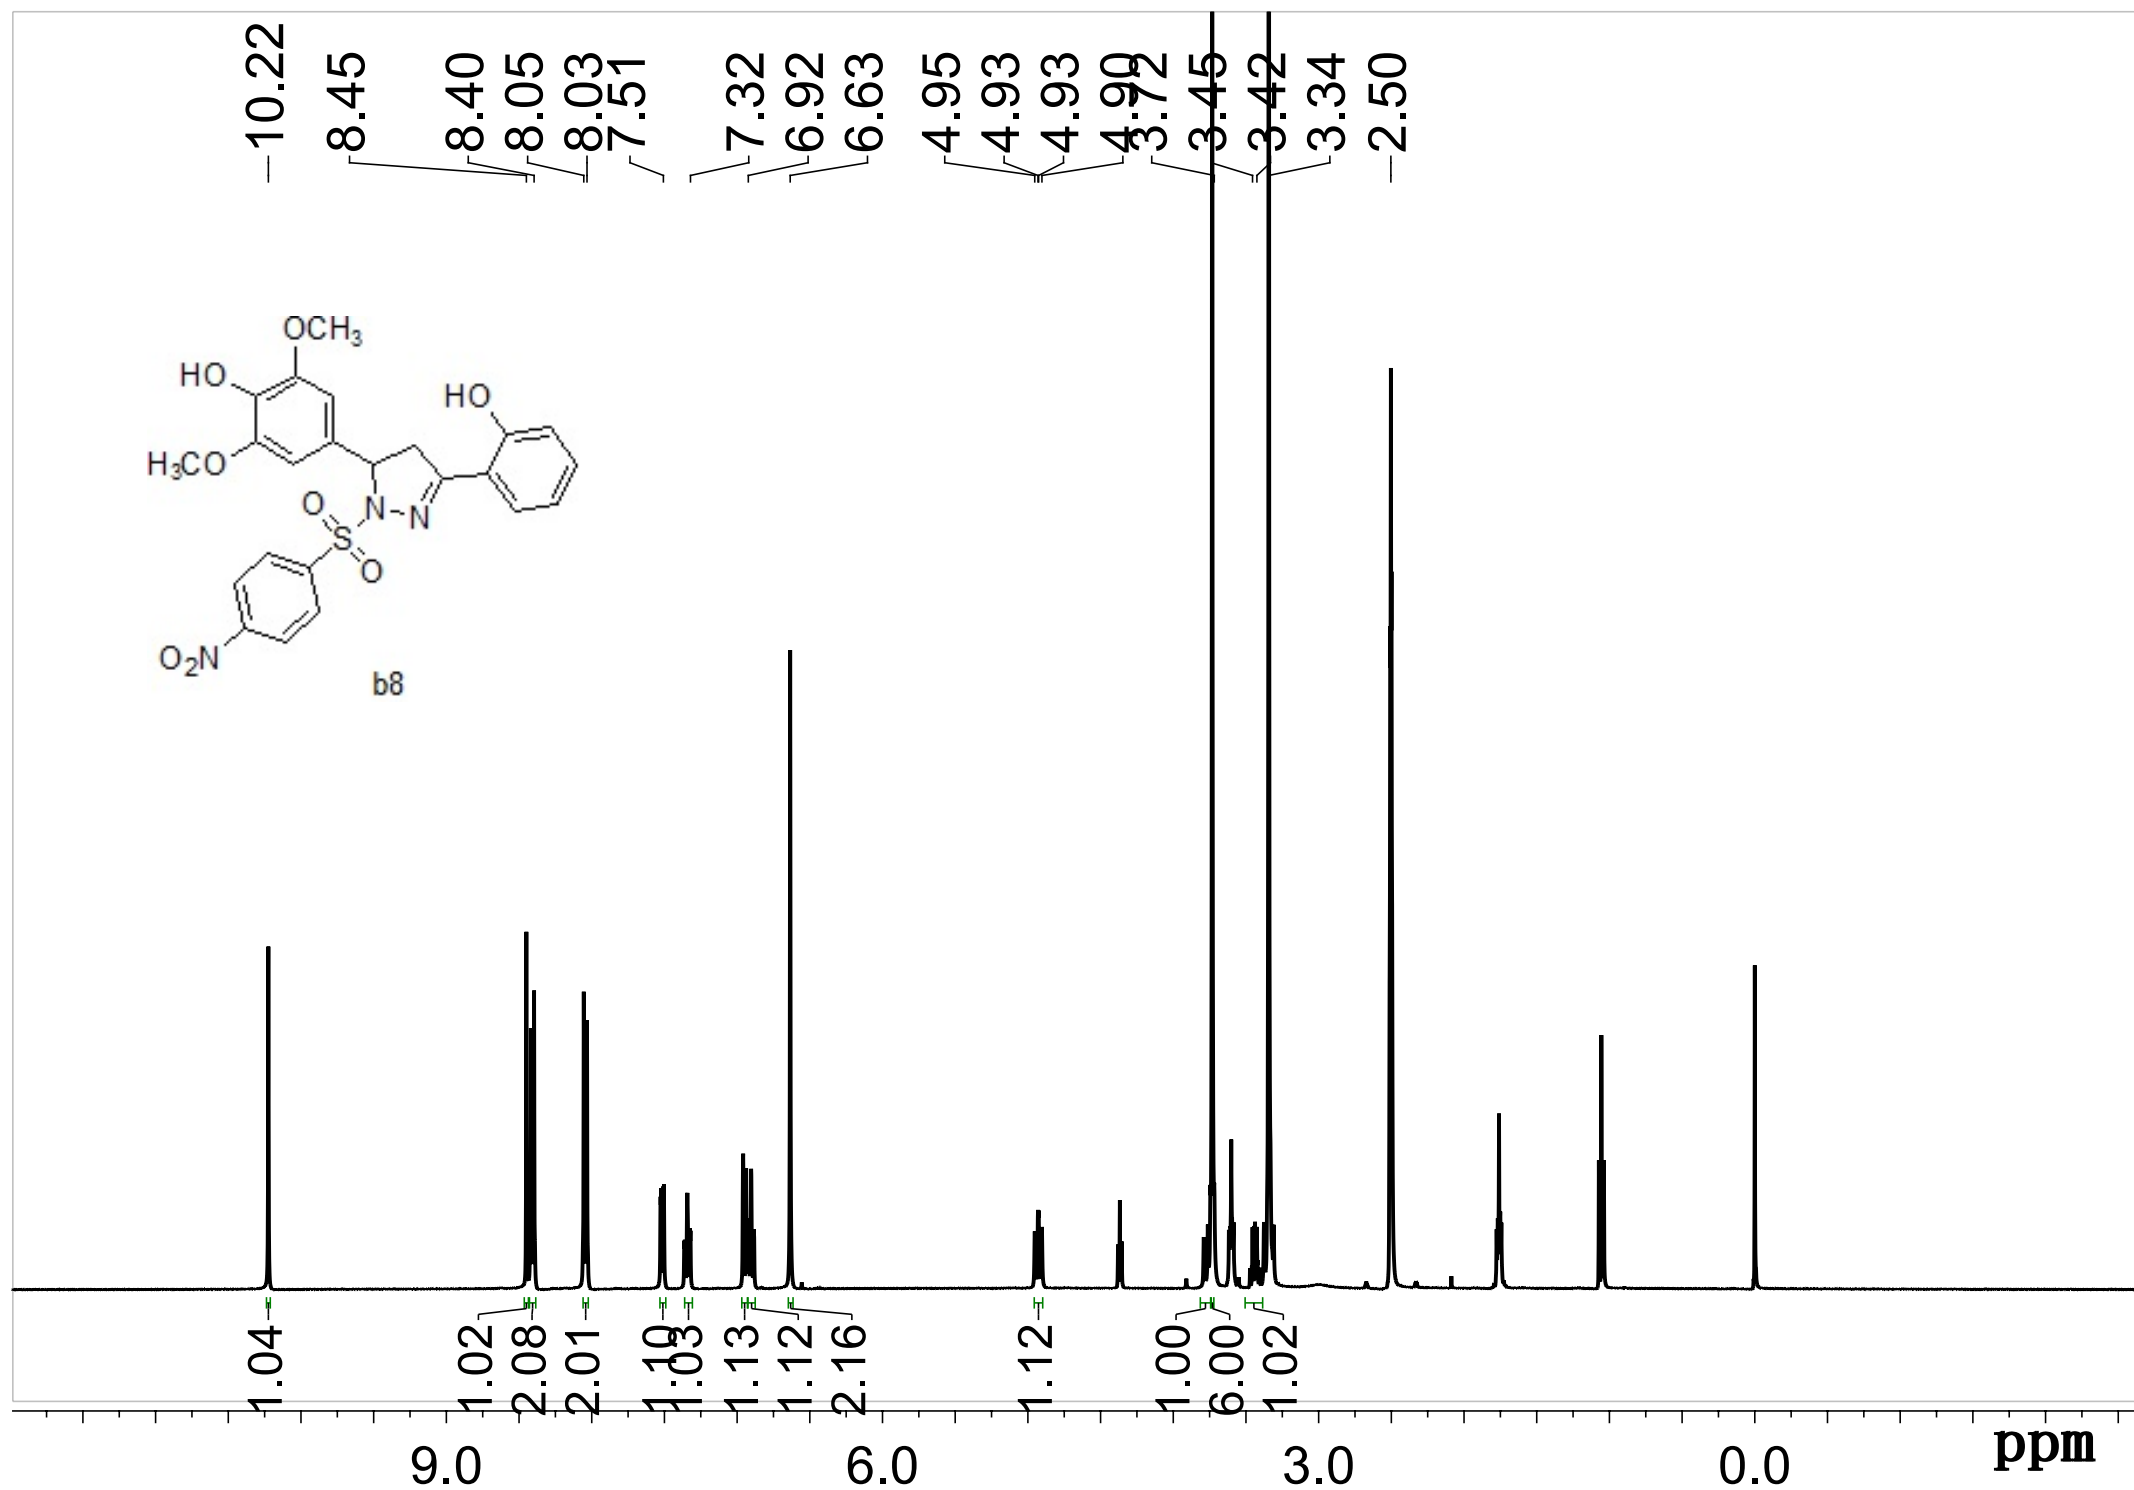

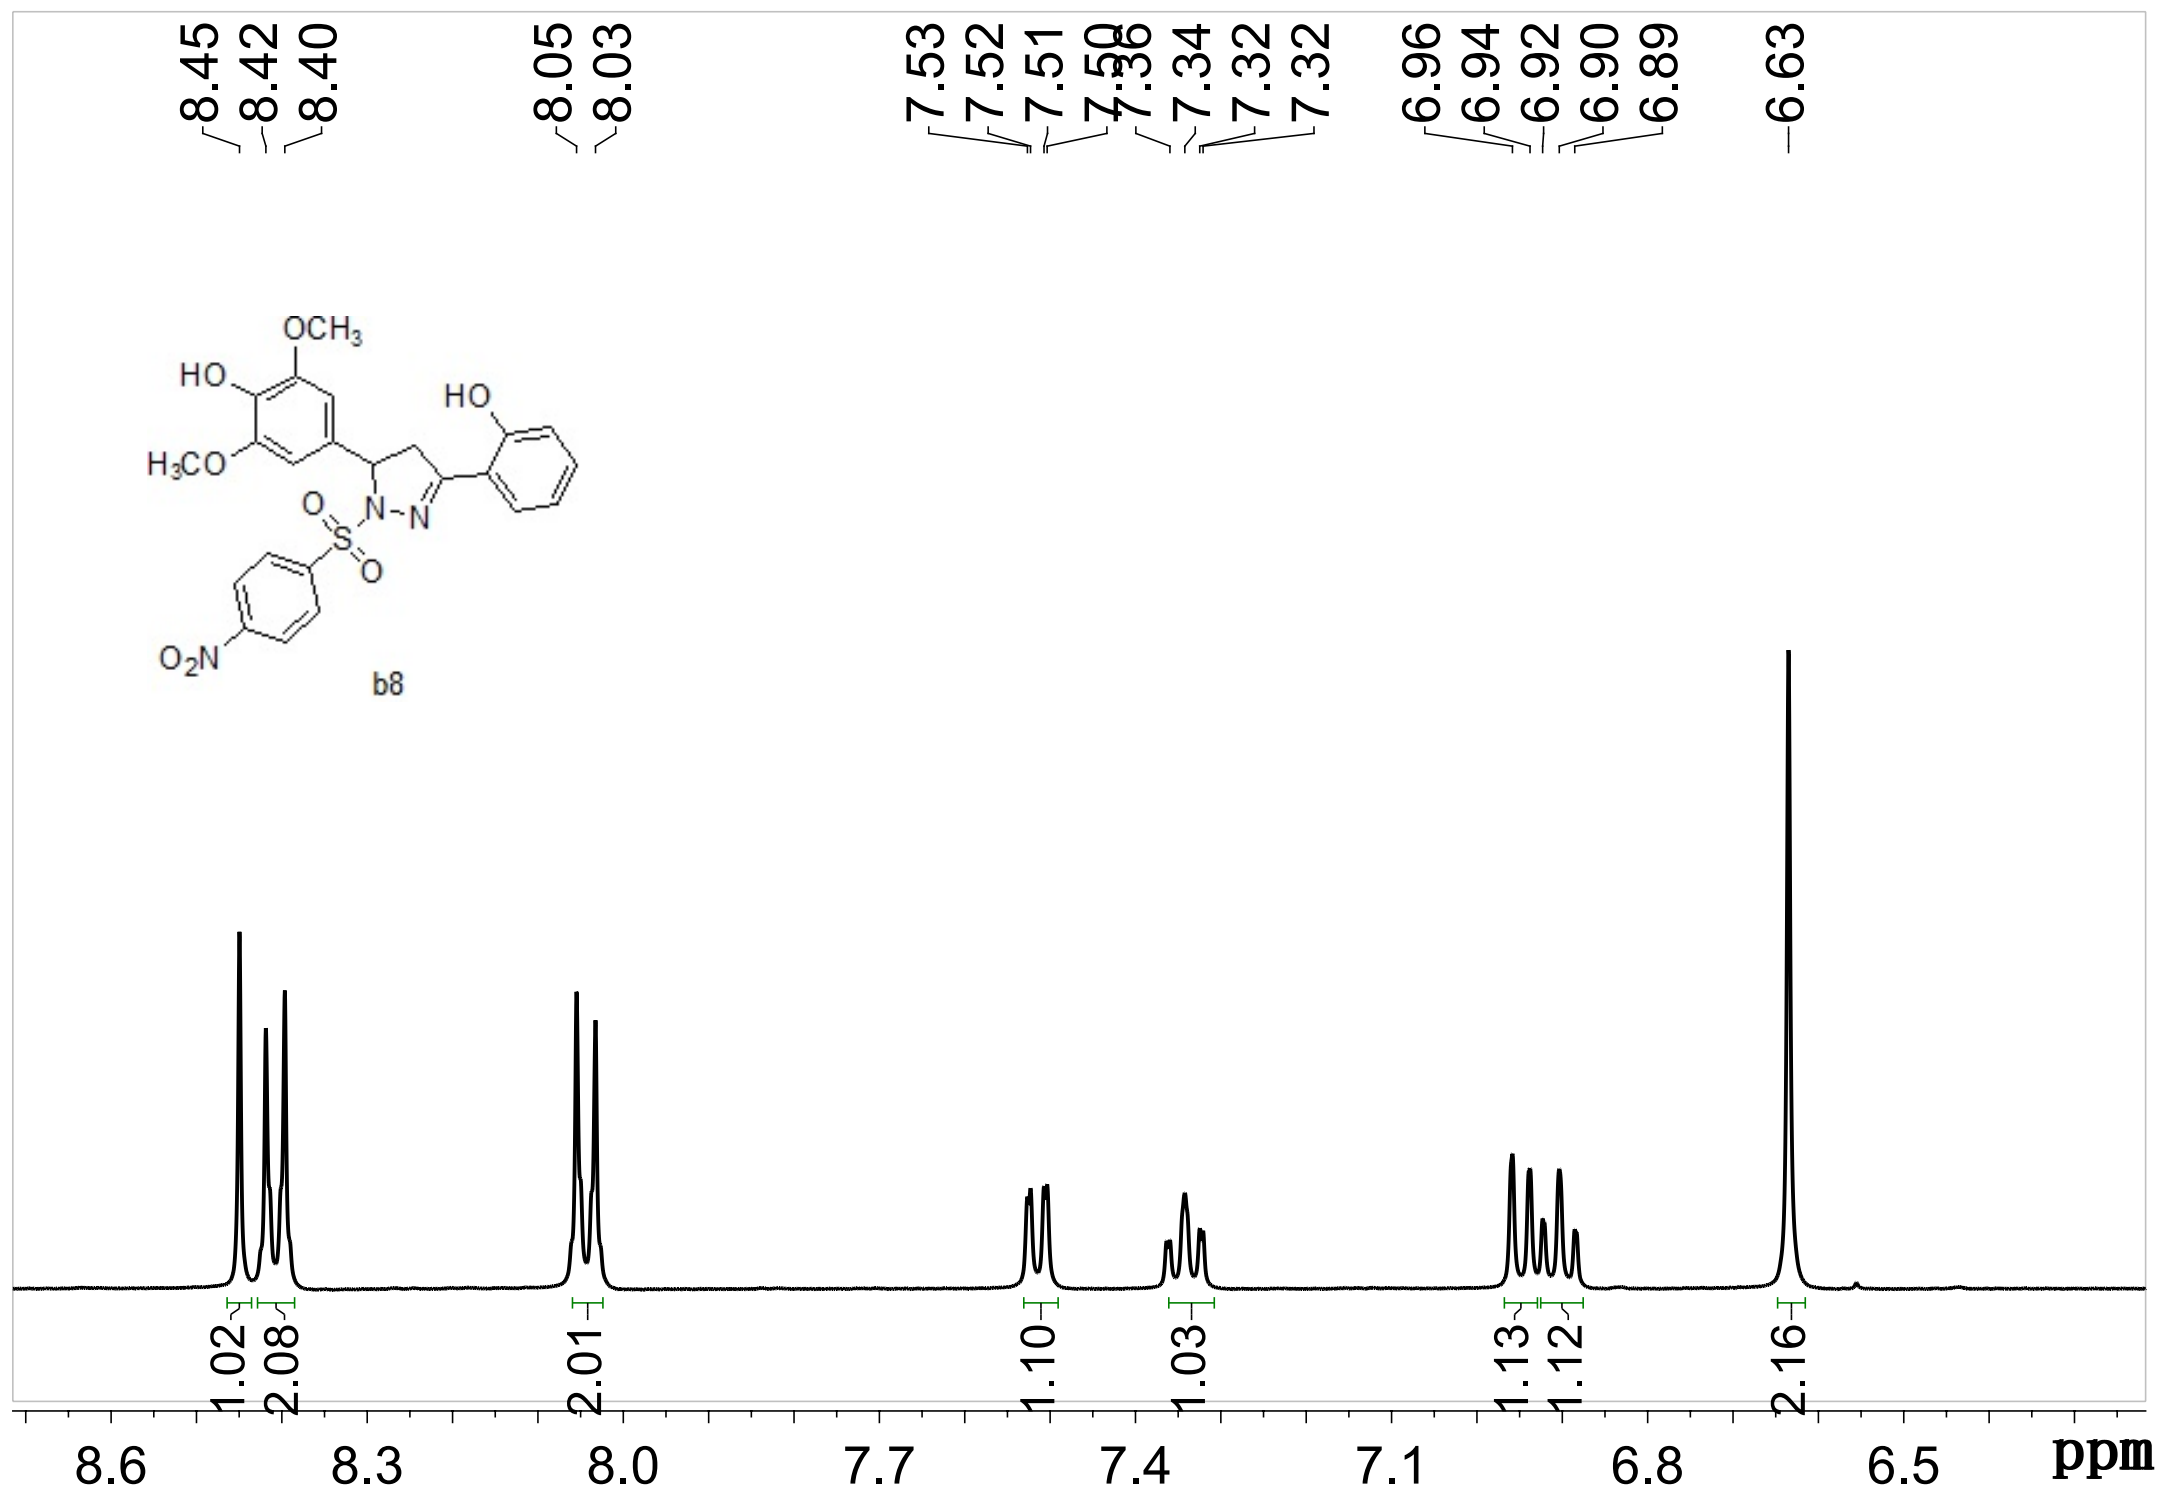



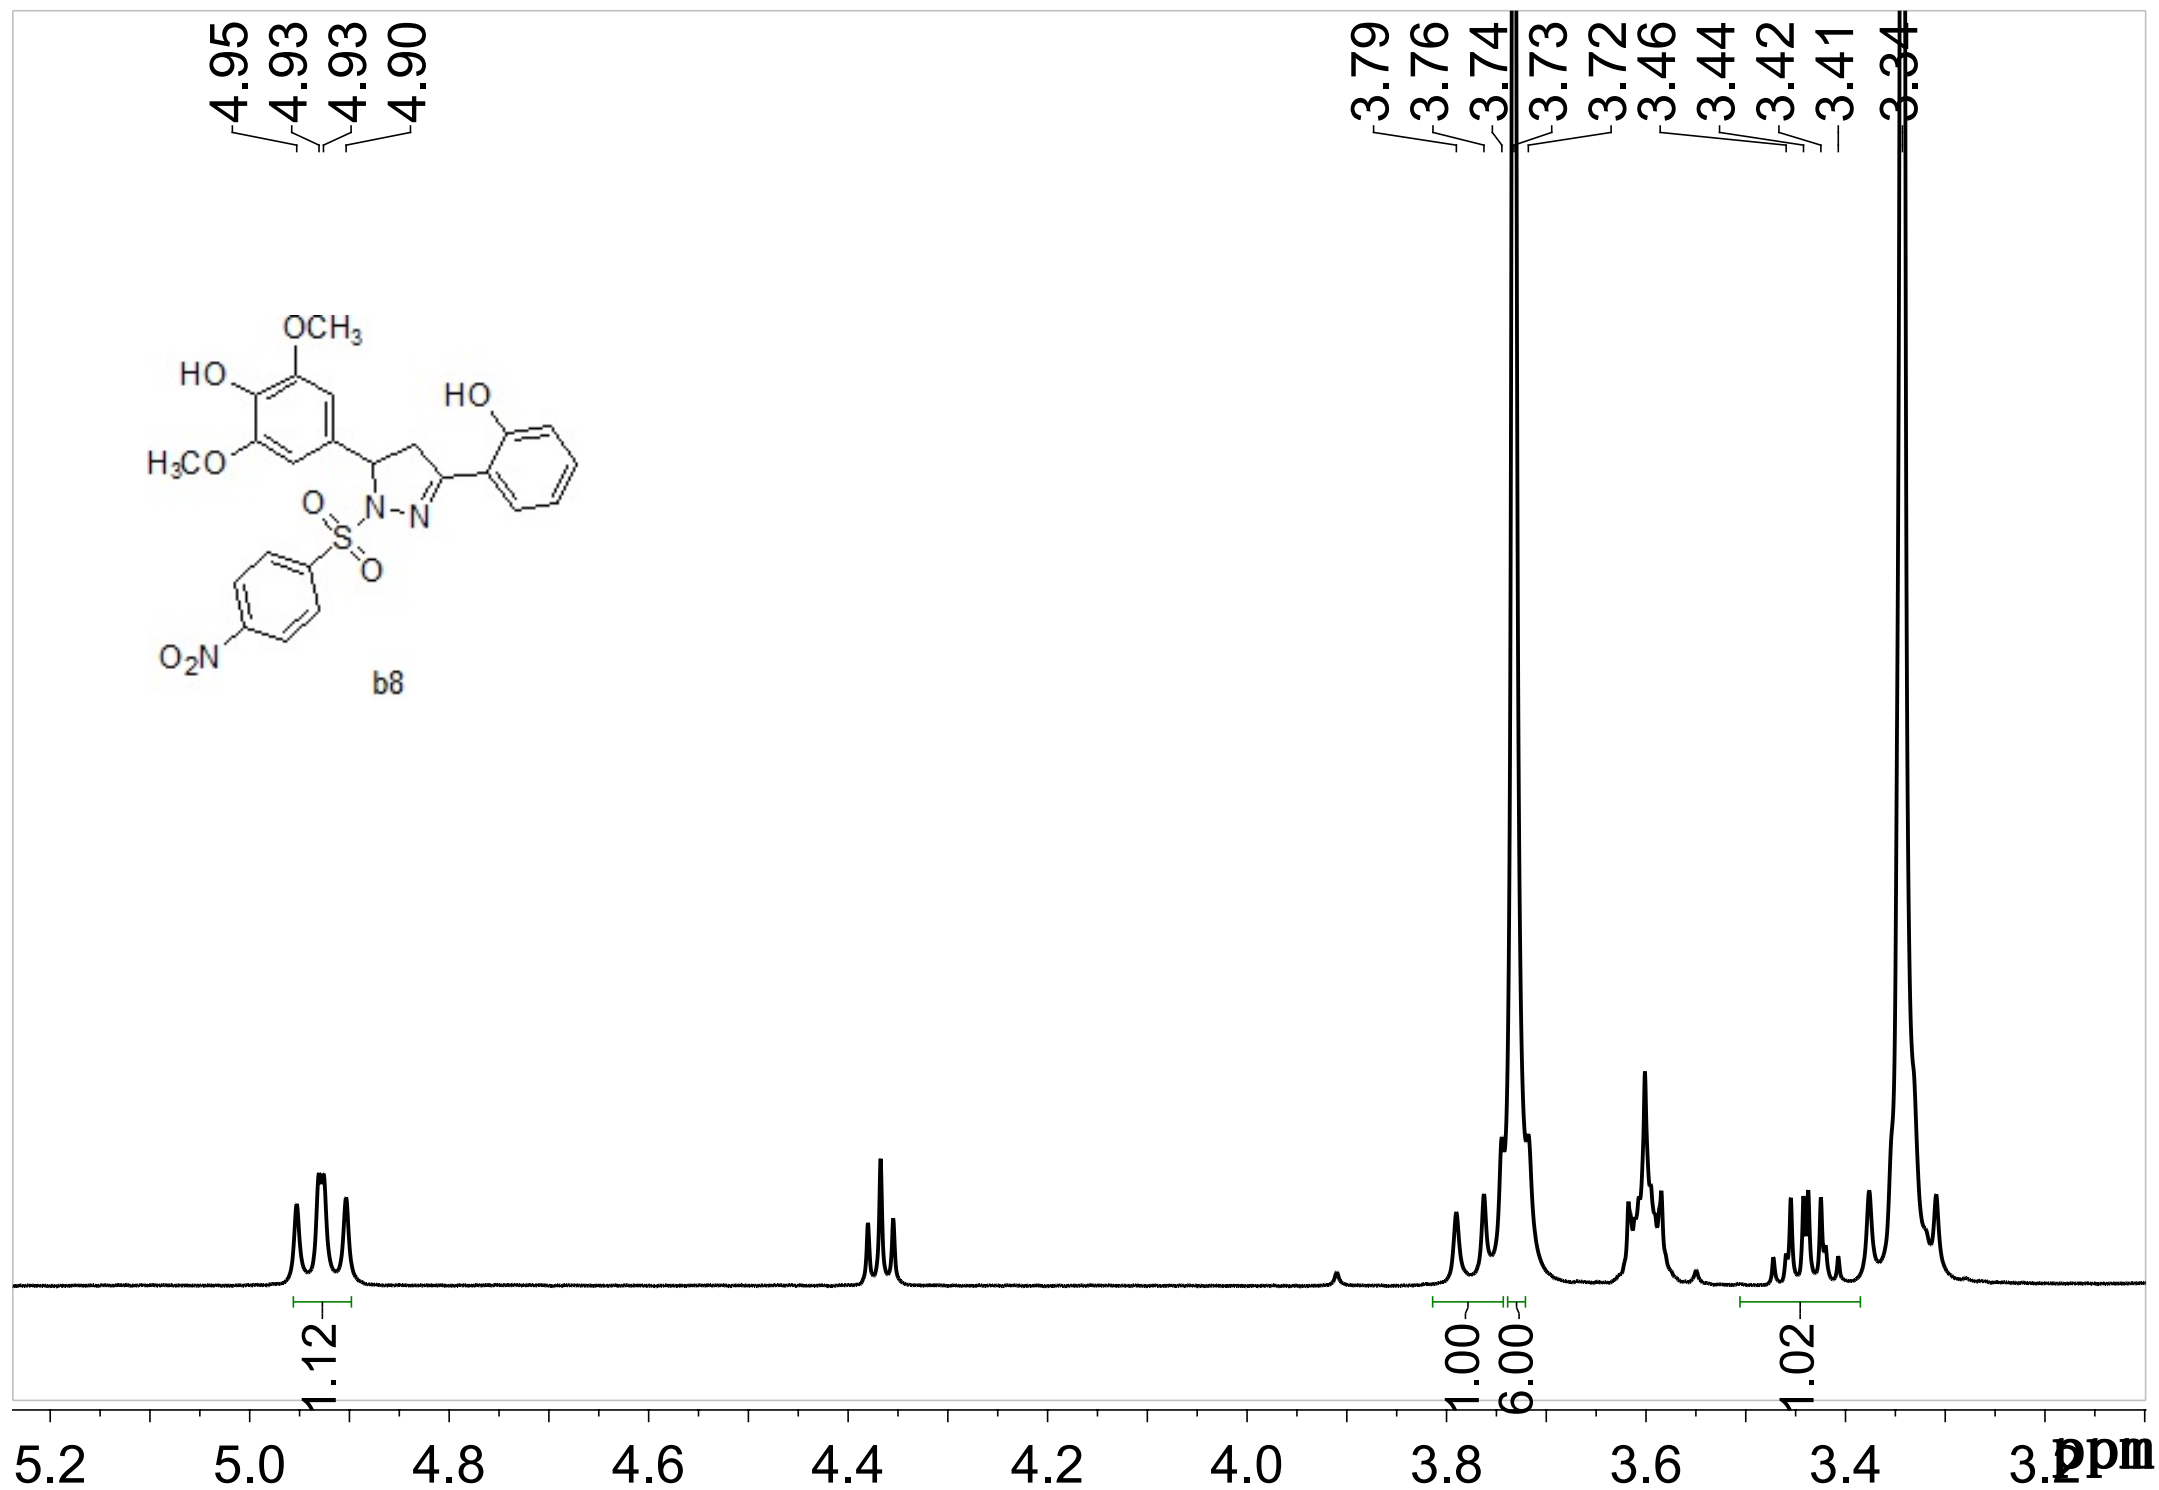

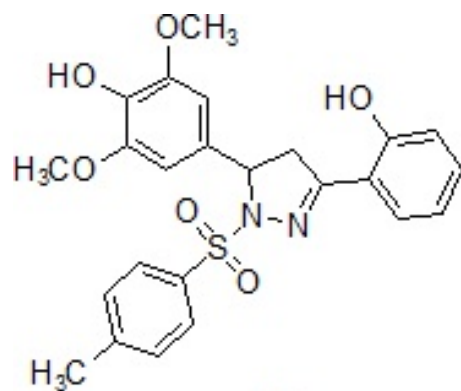

**b9**

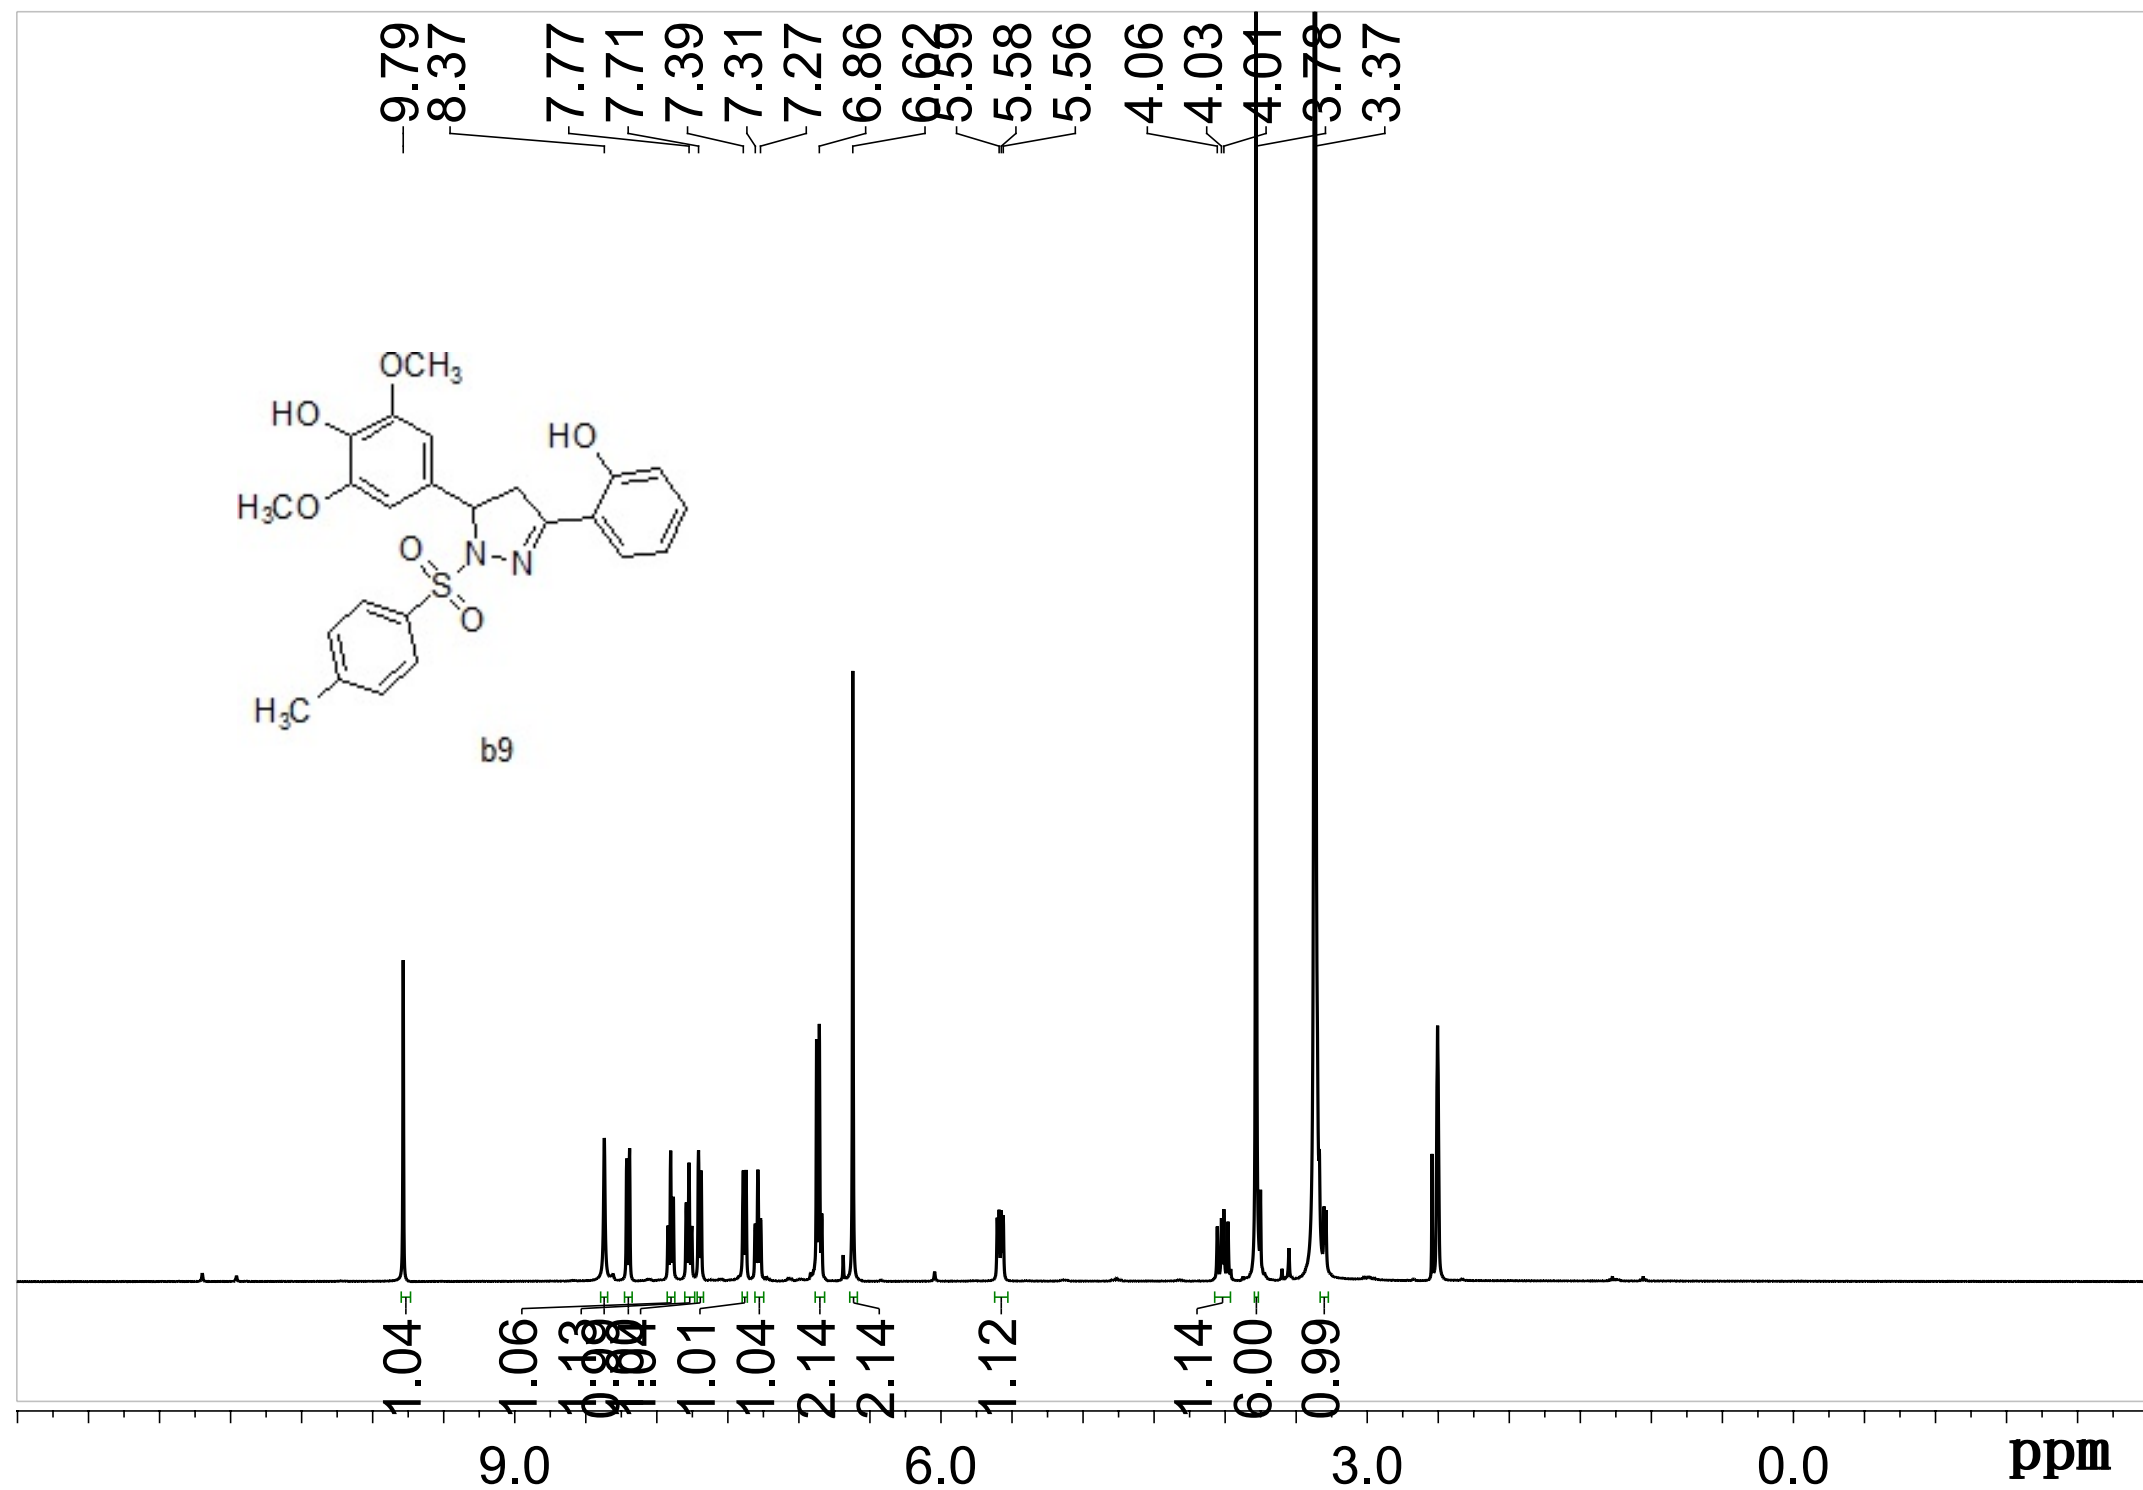

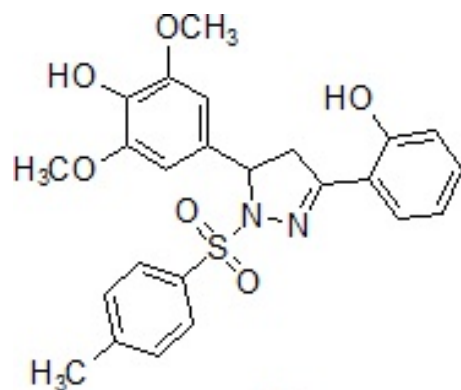

b9

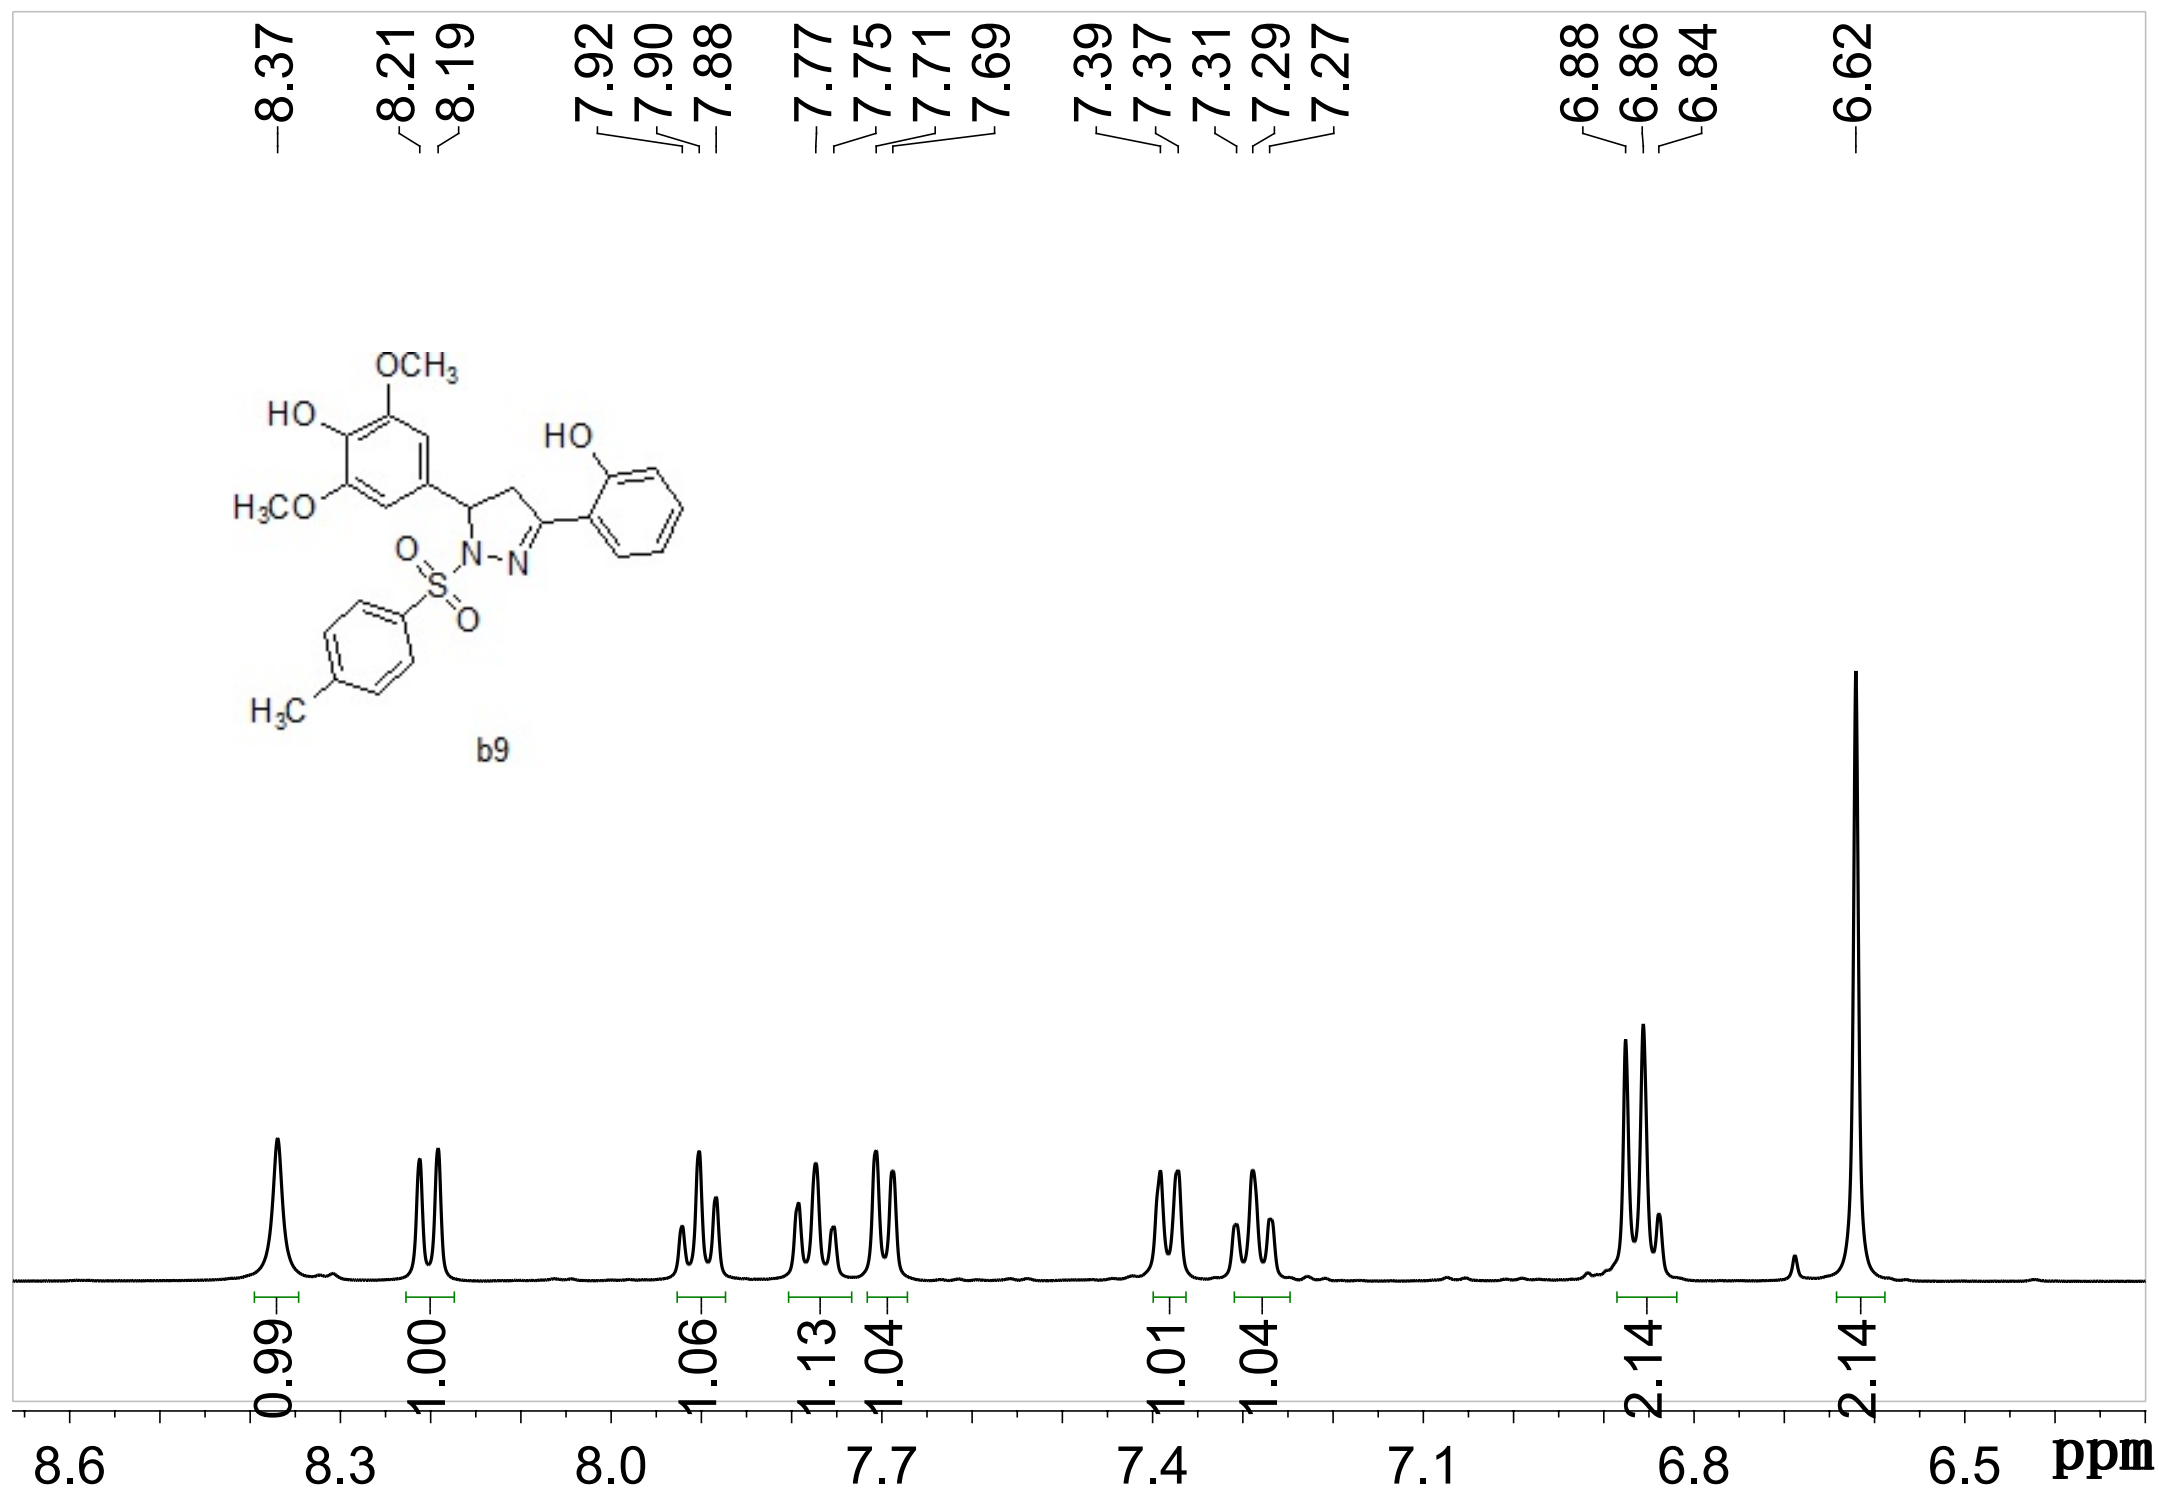

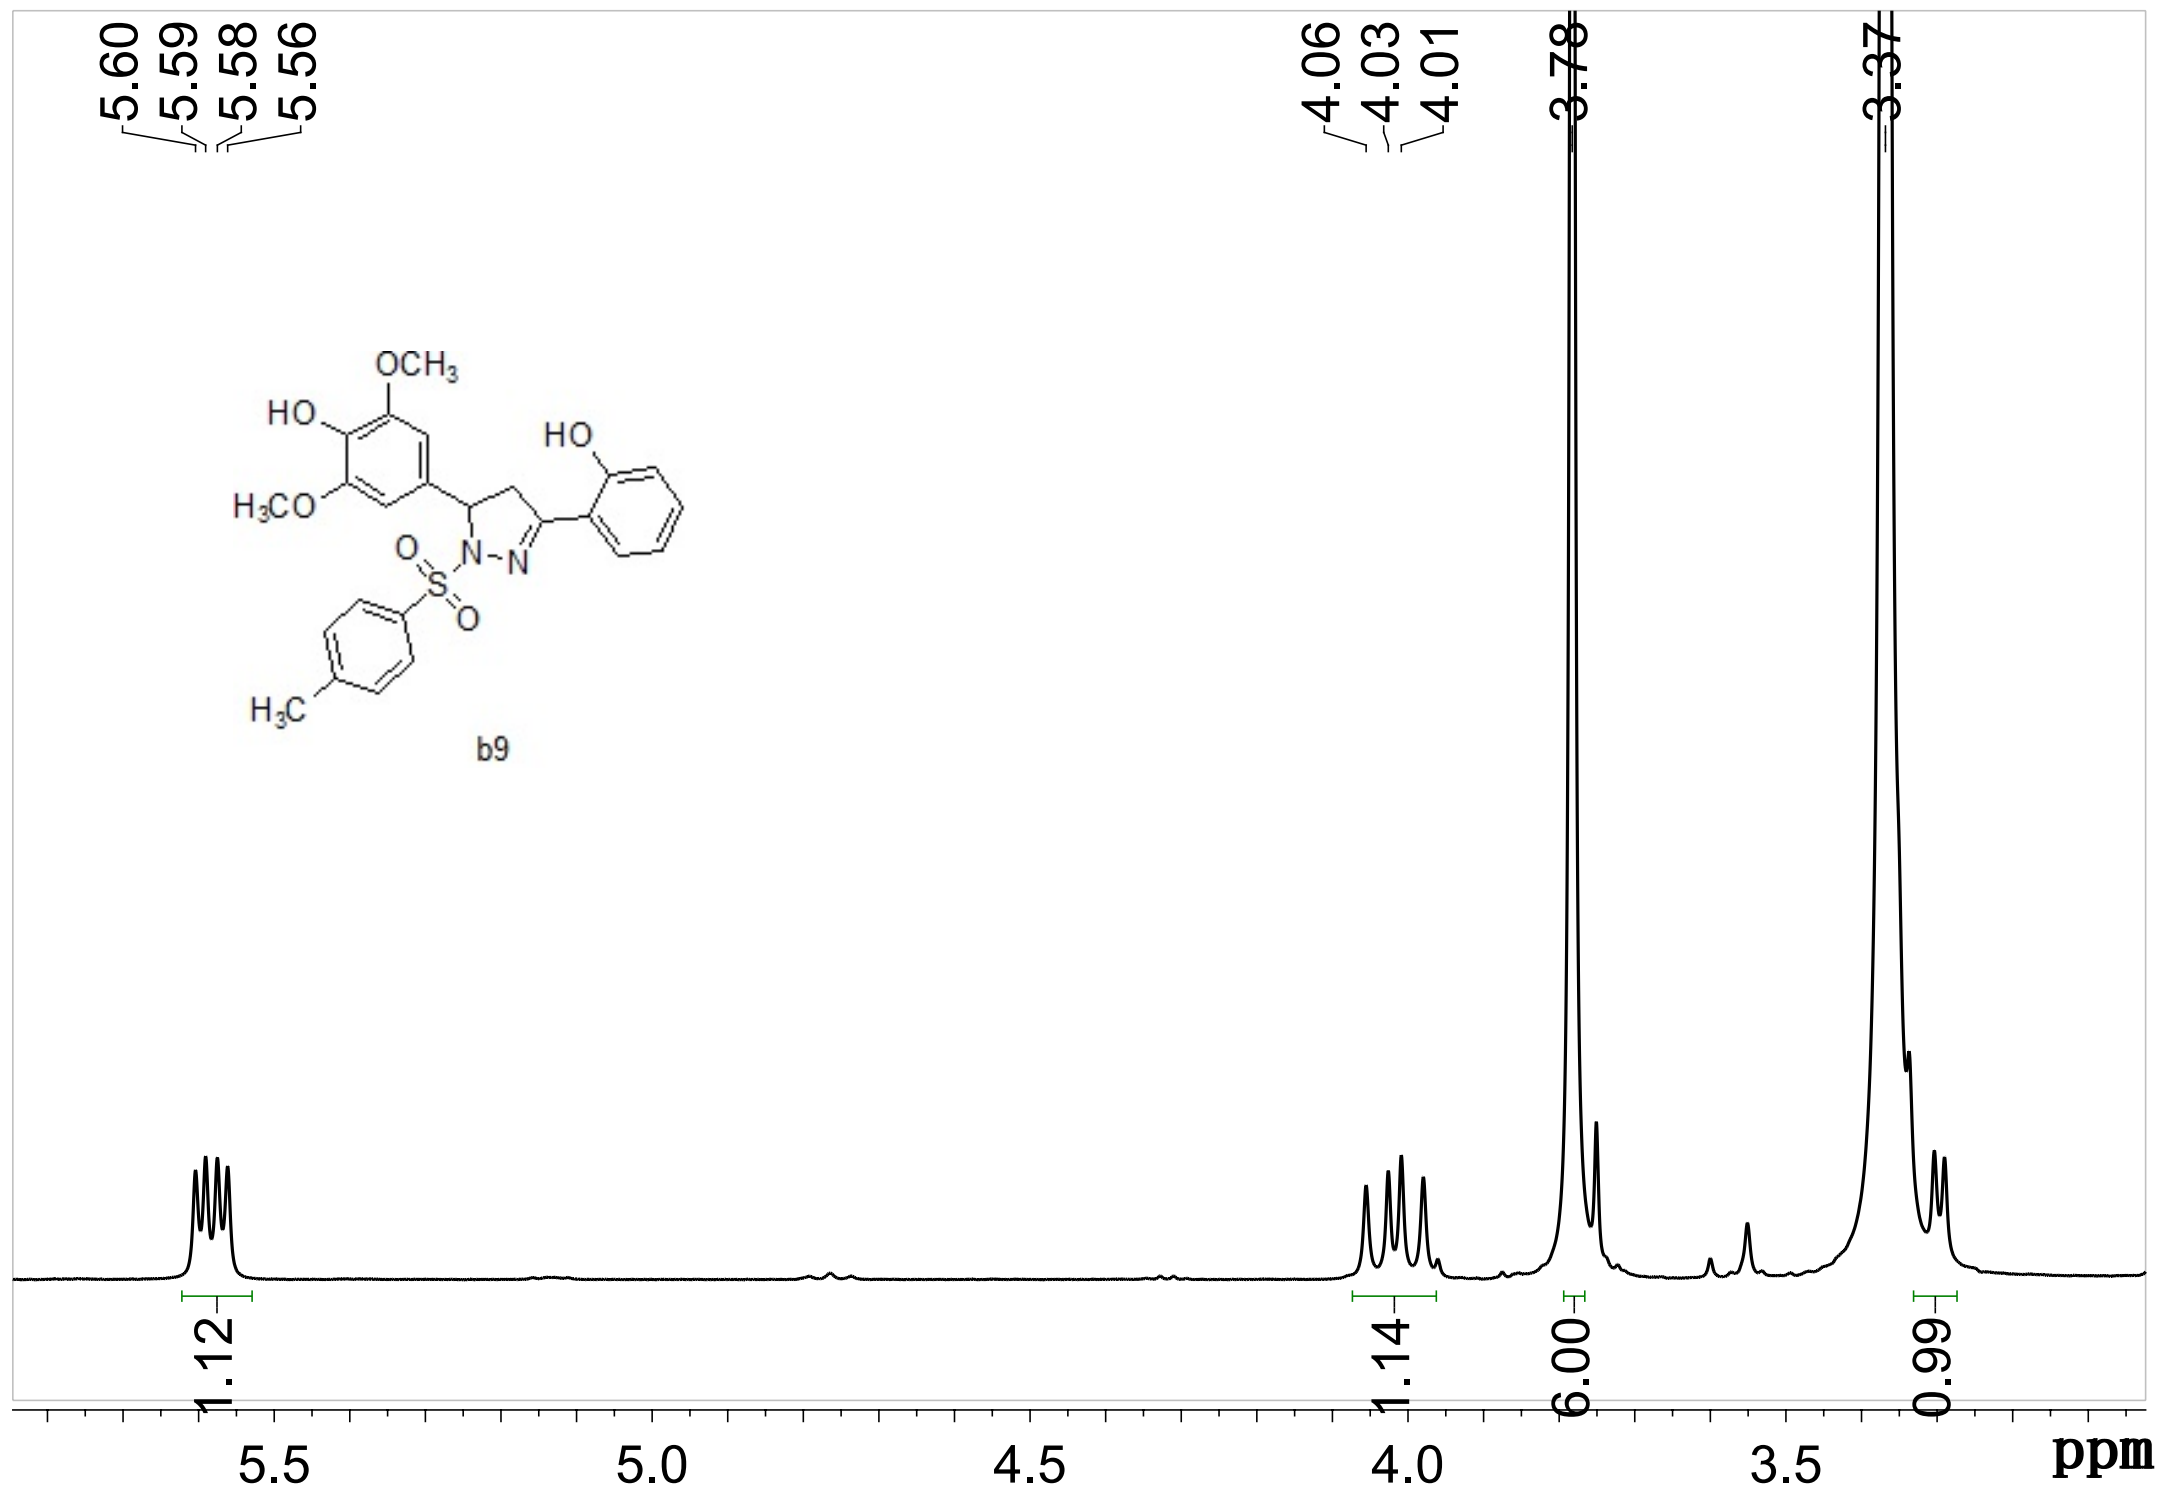

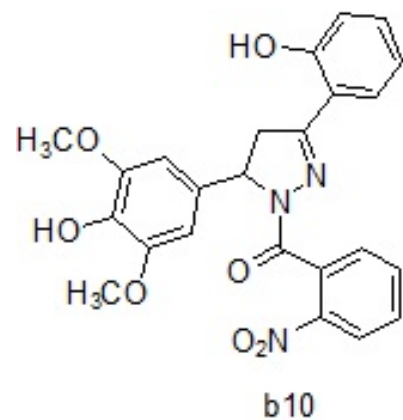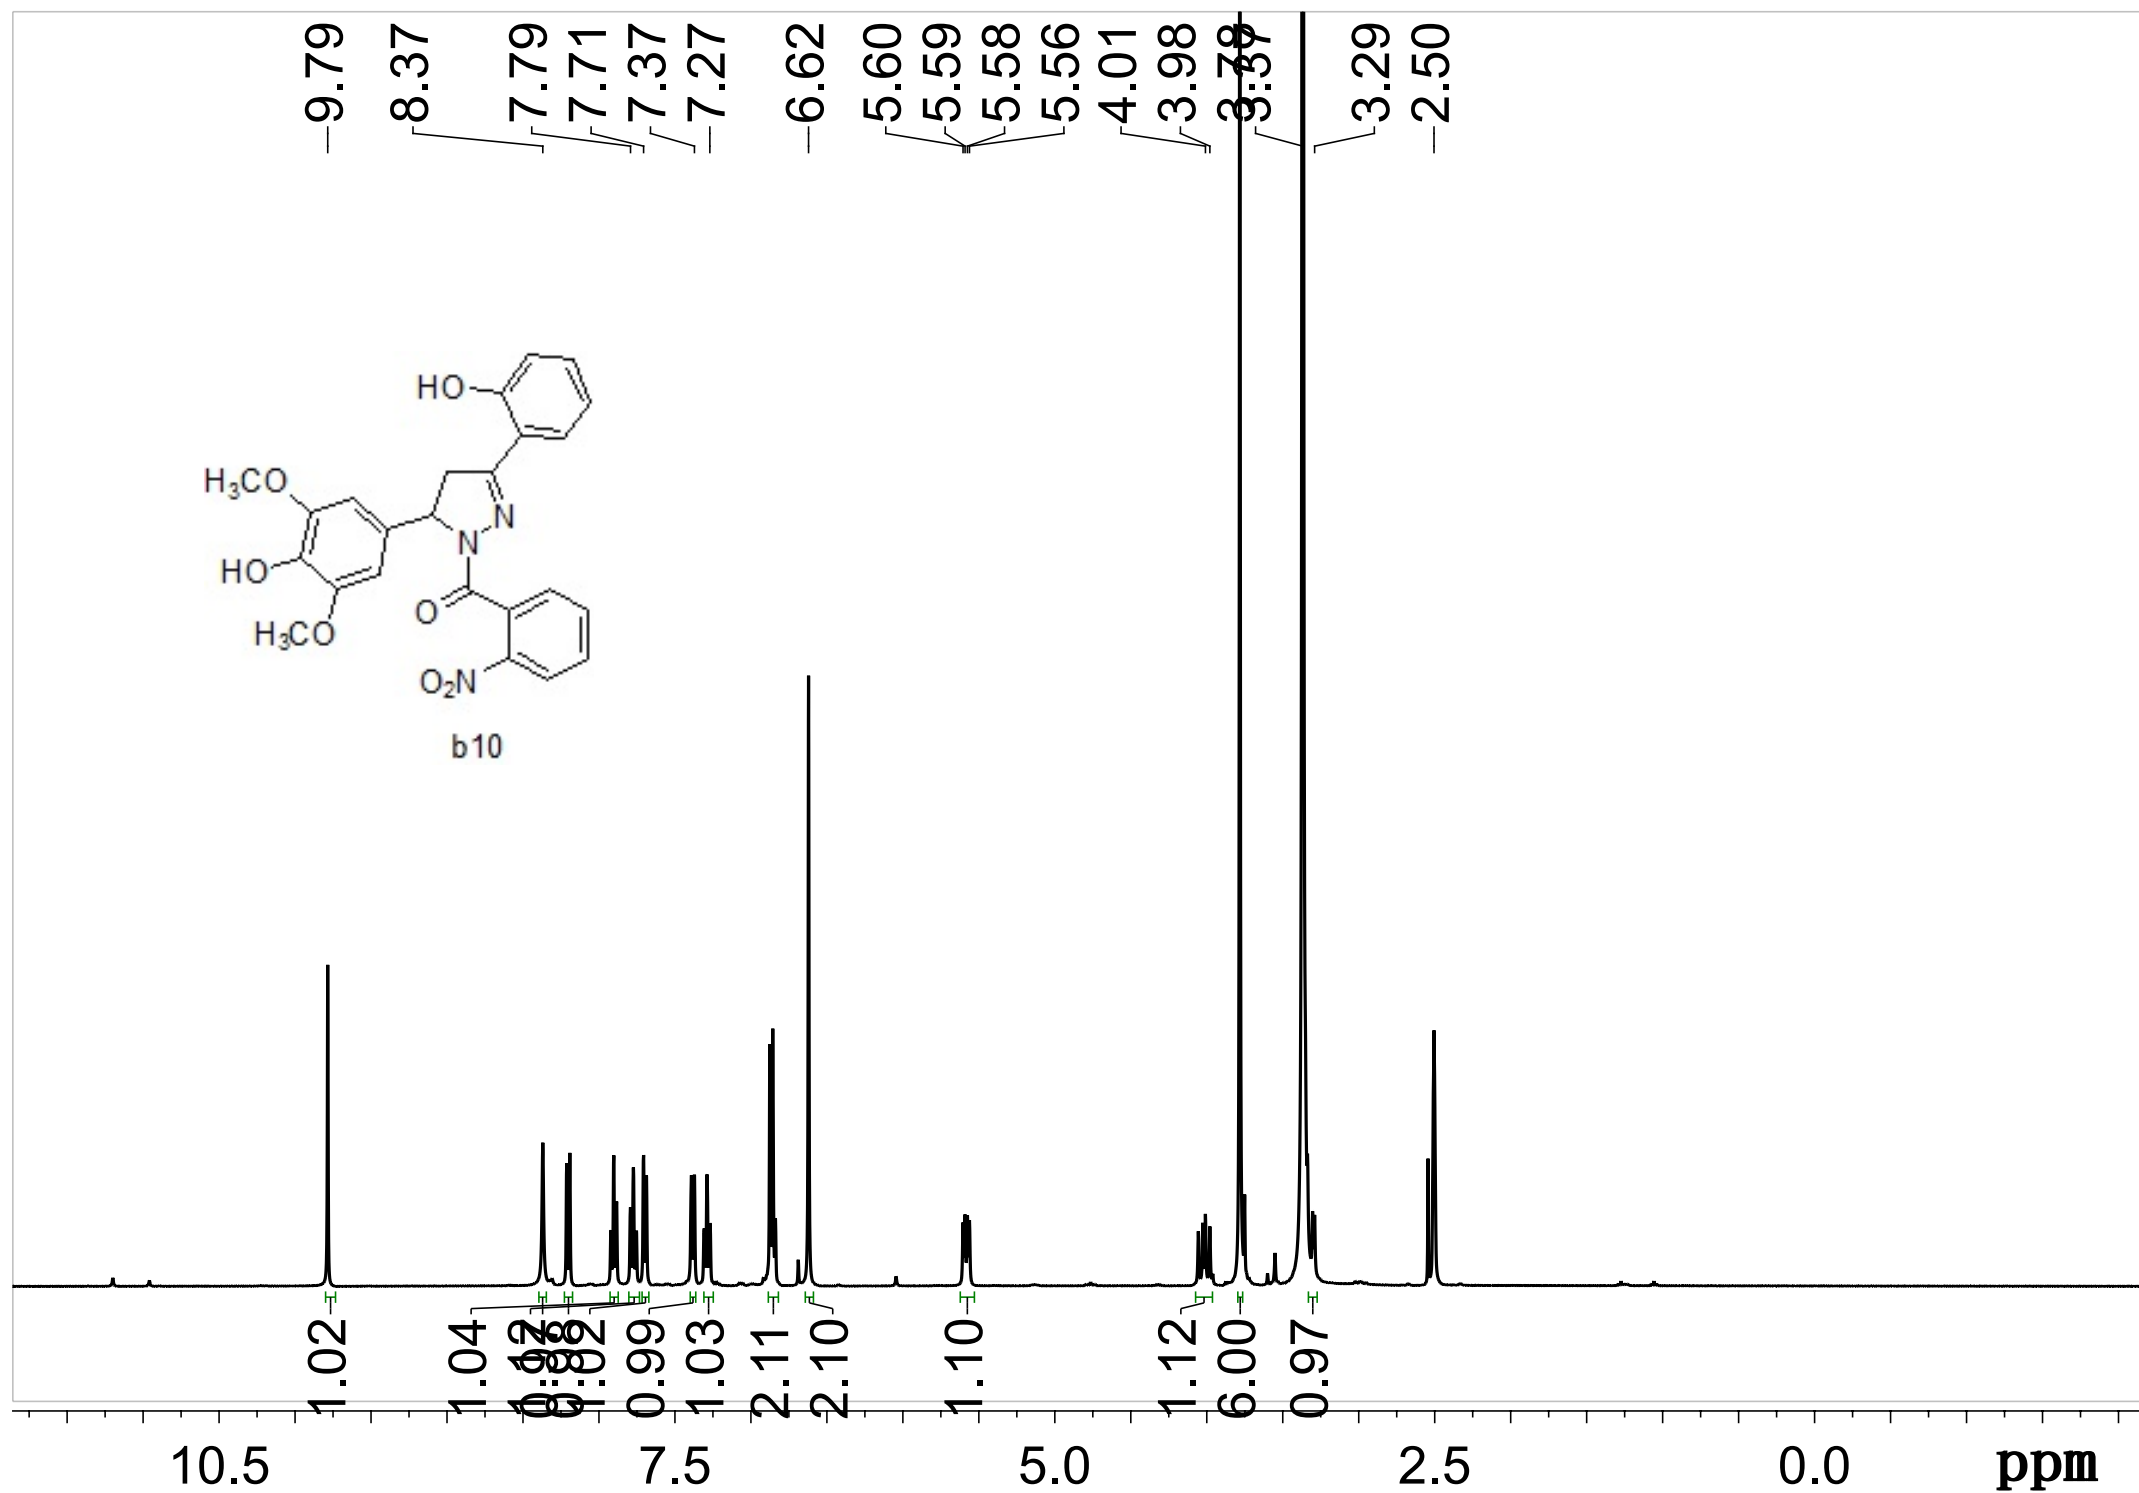

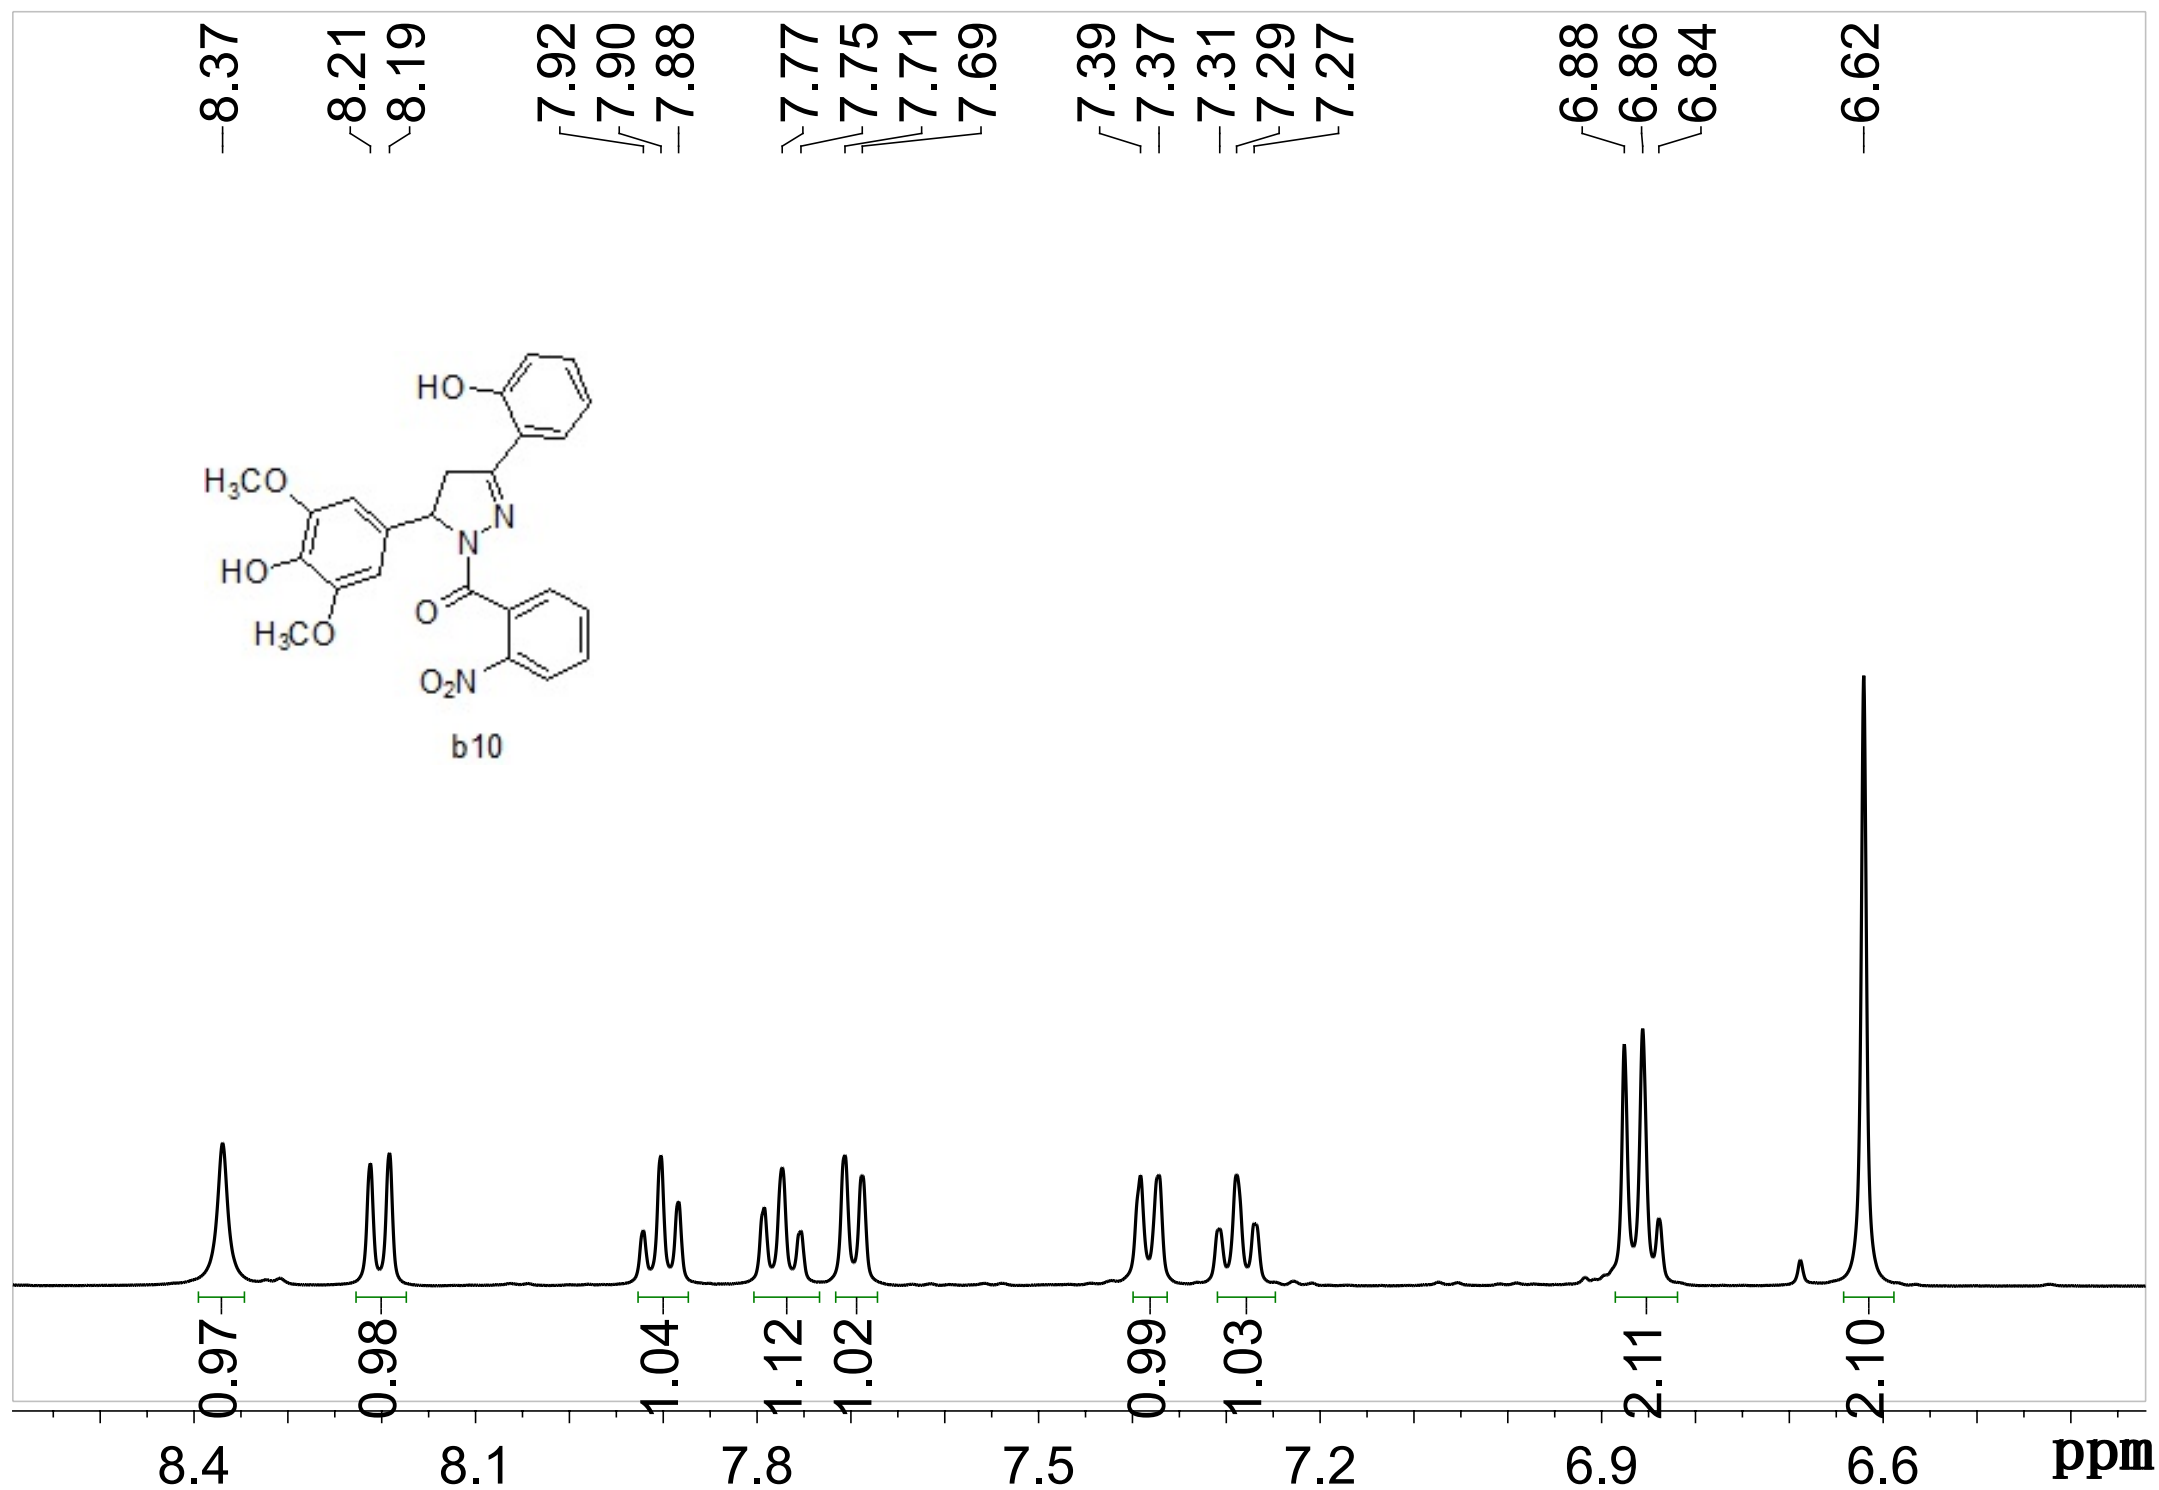

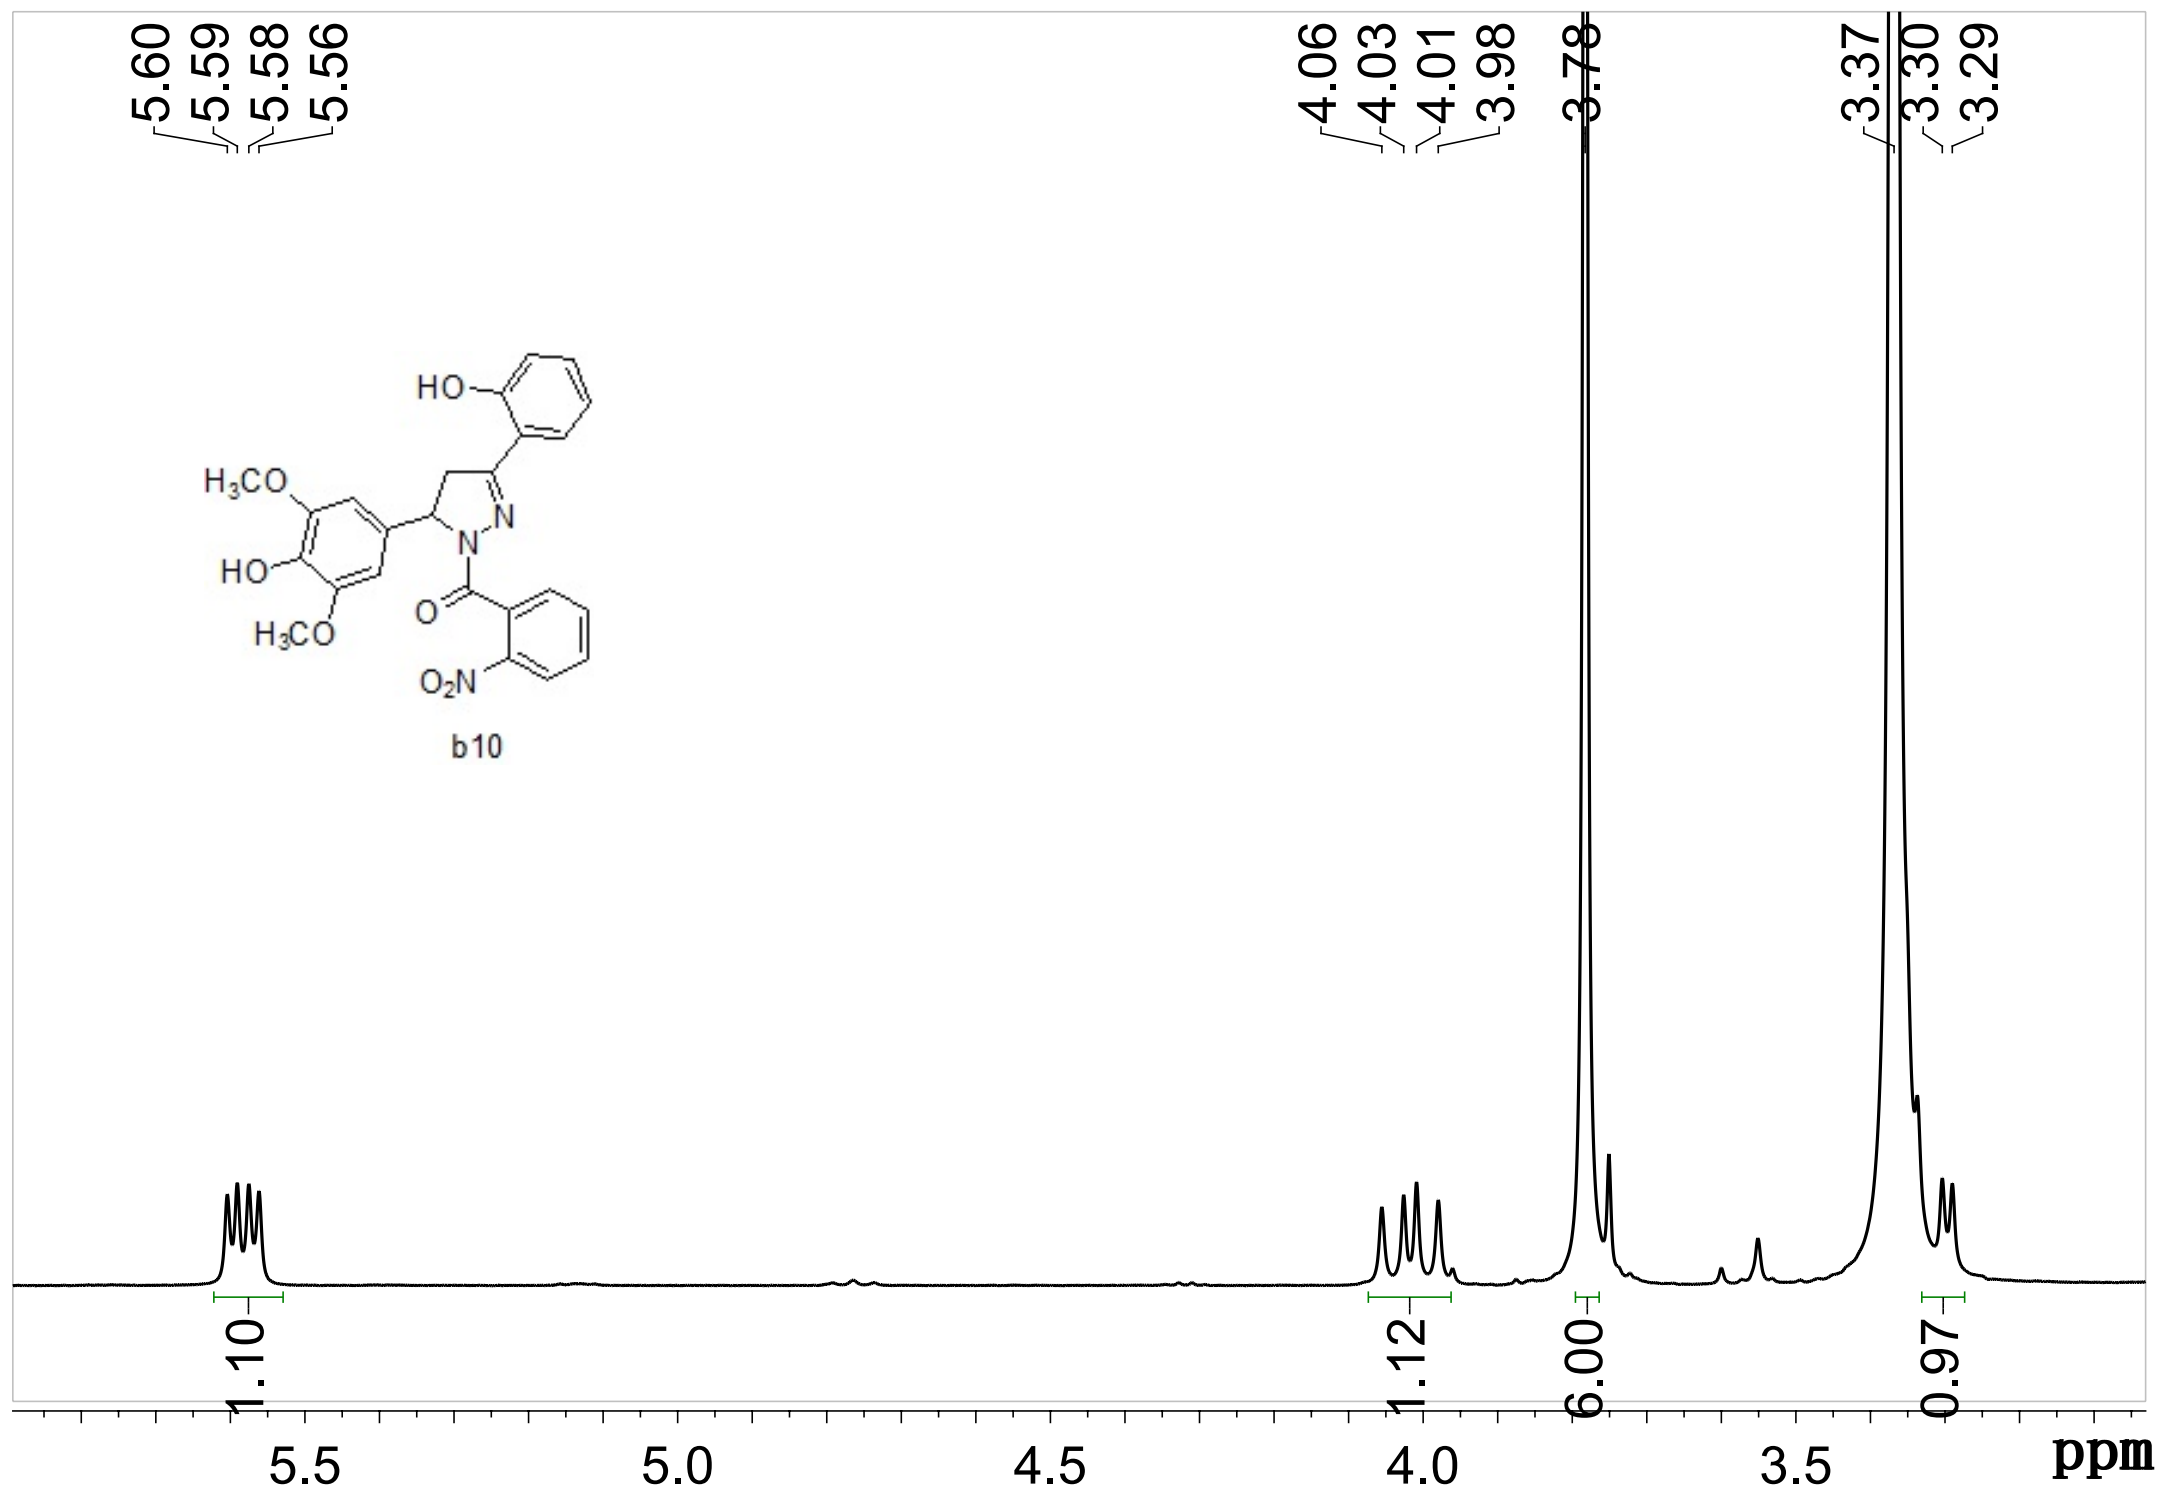

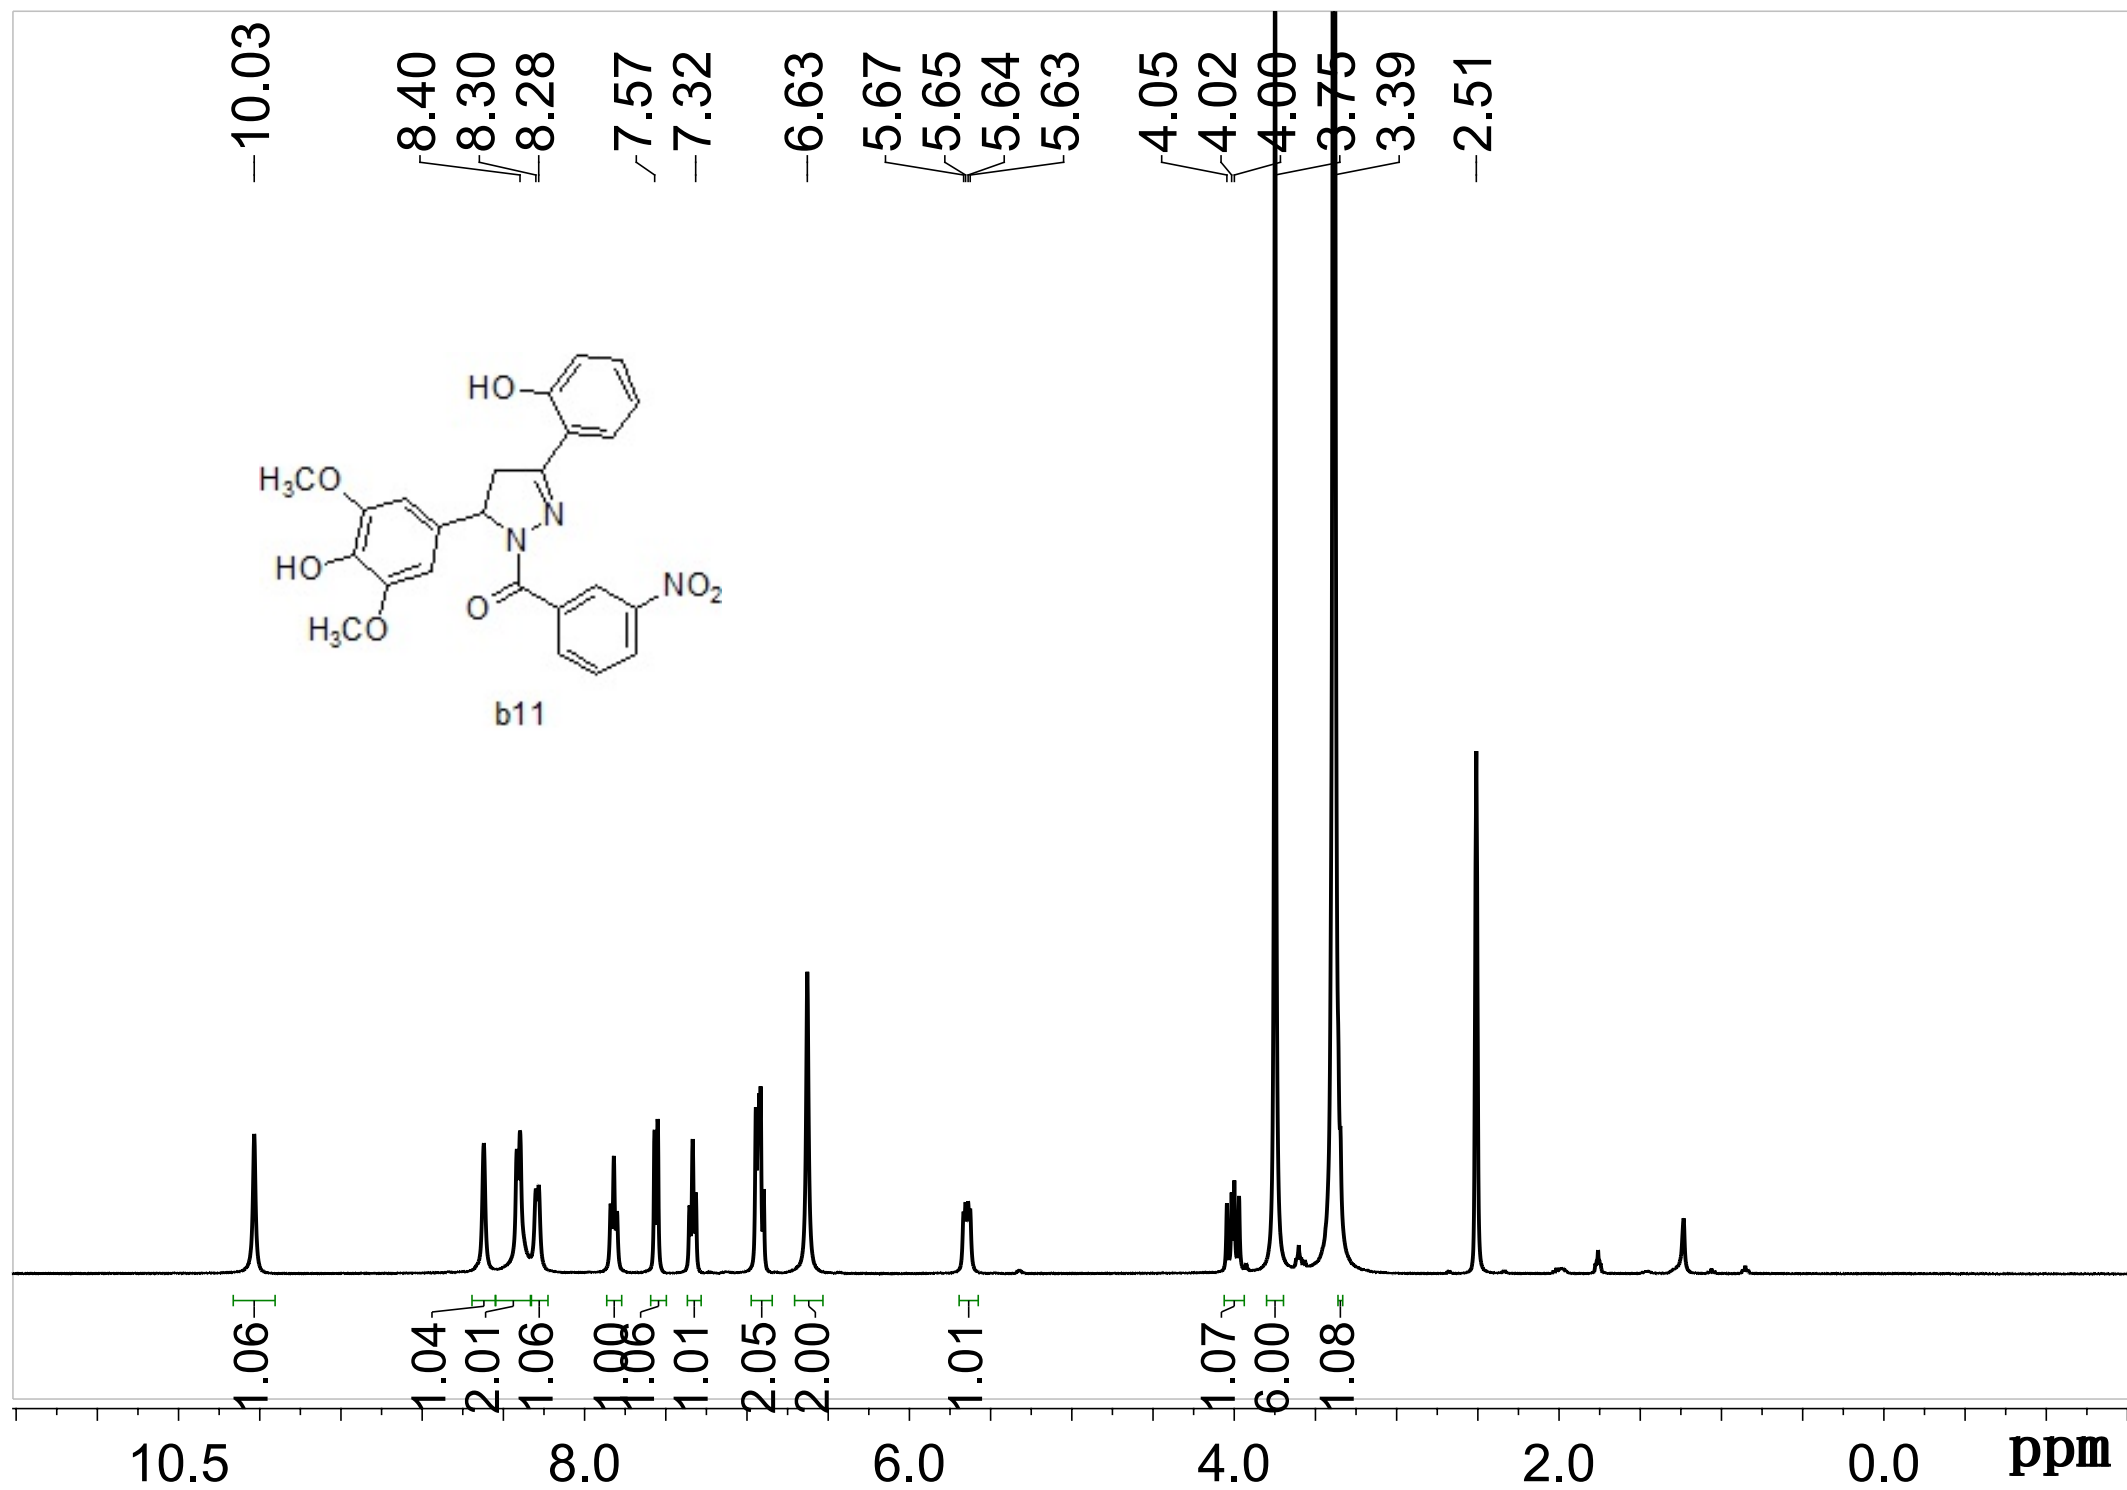



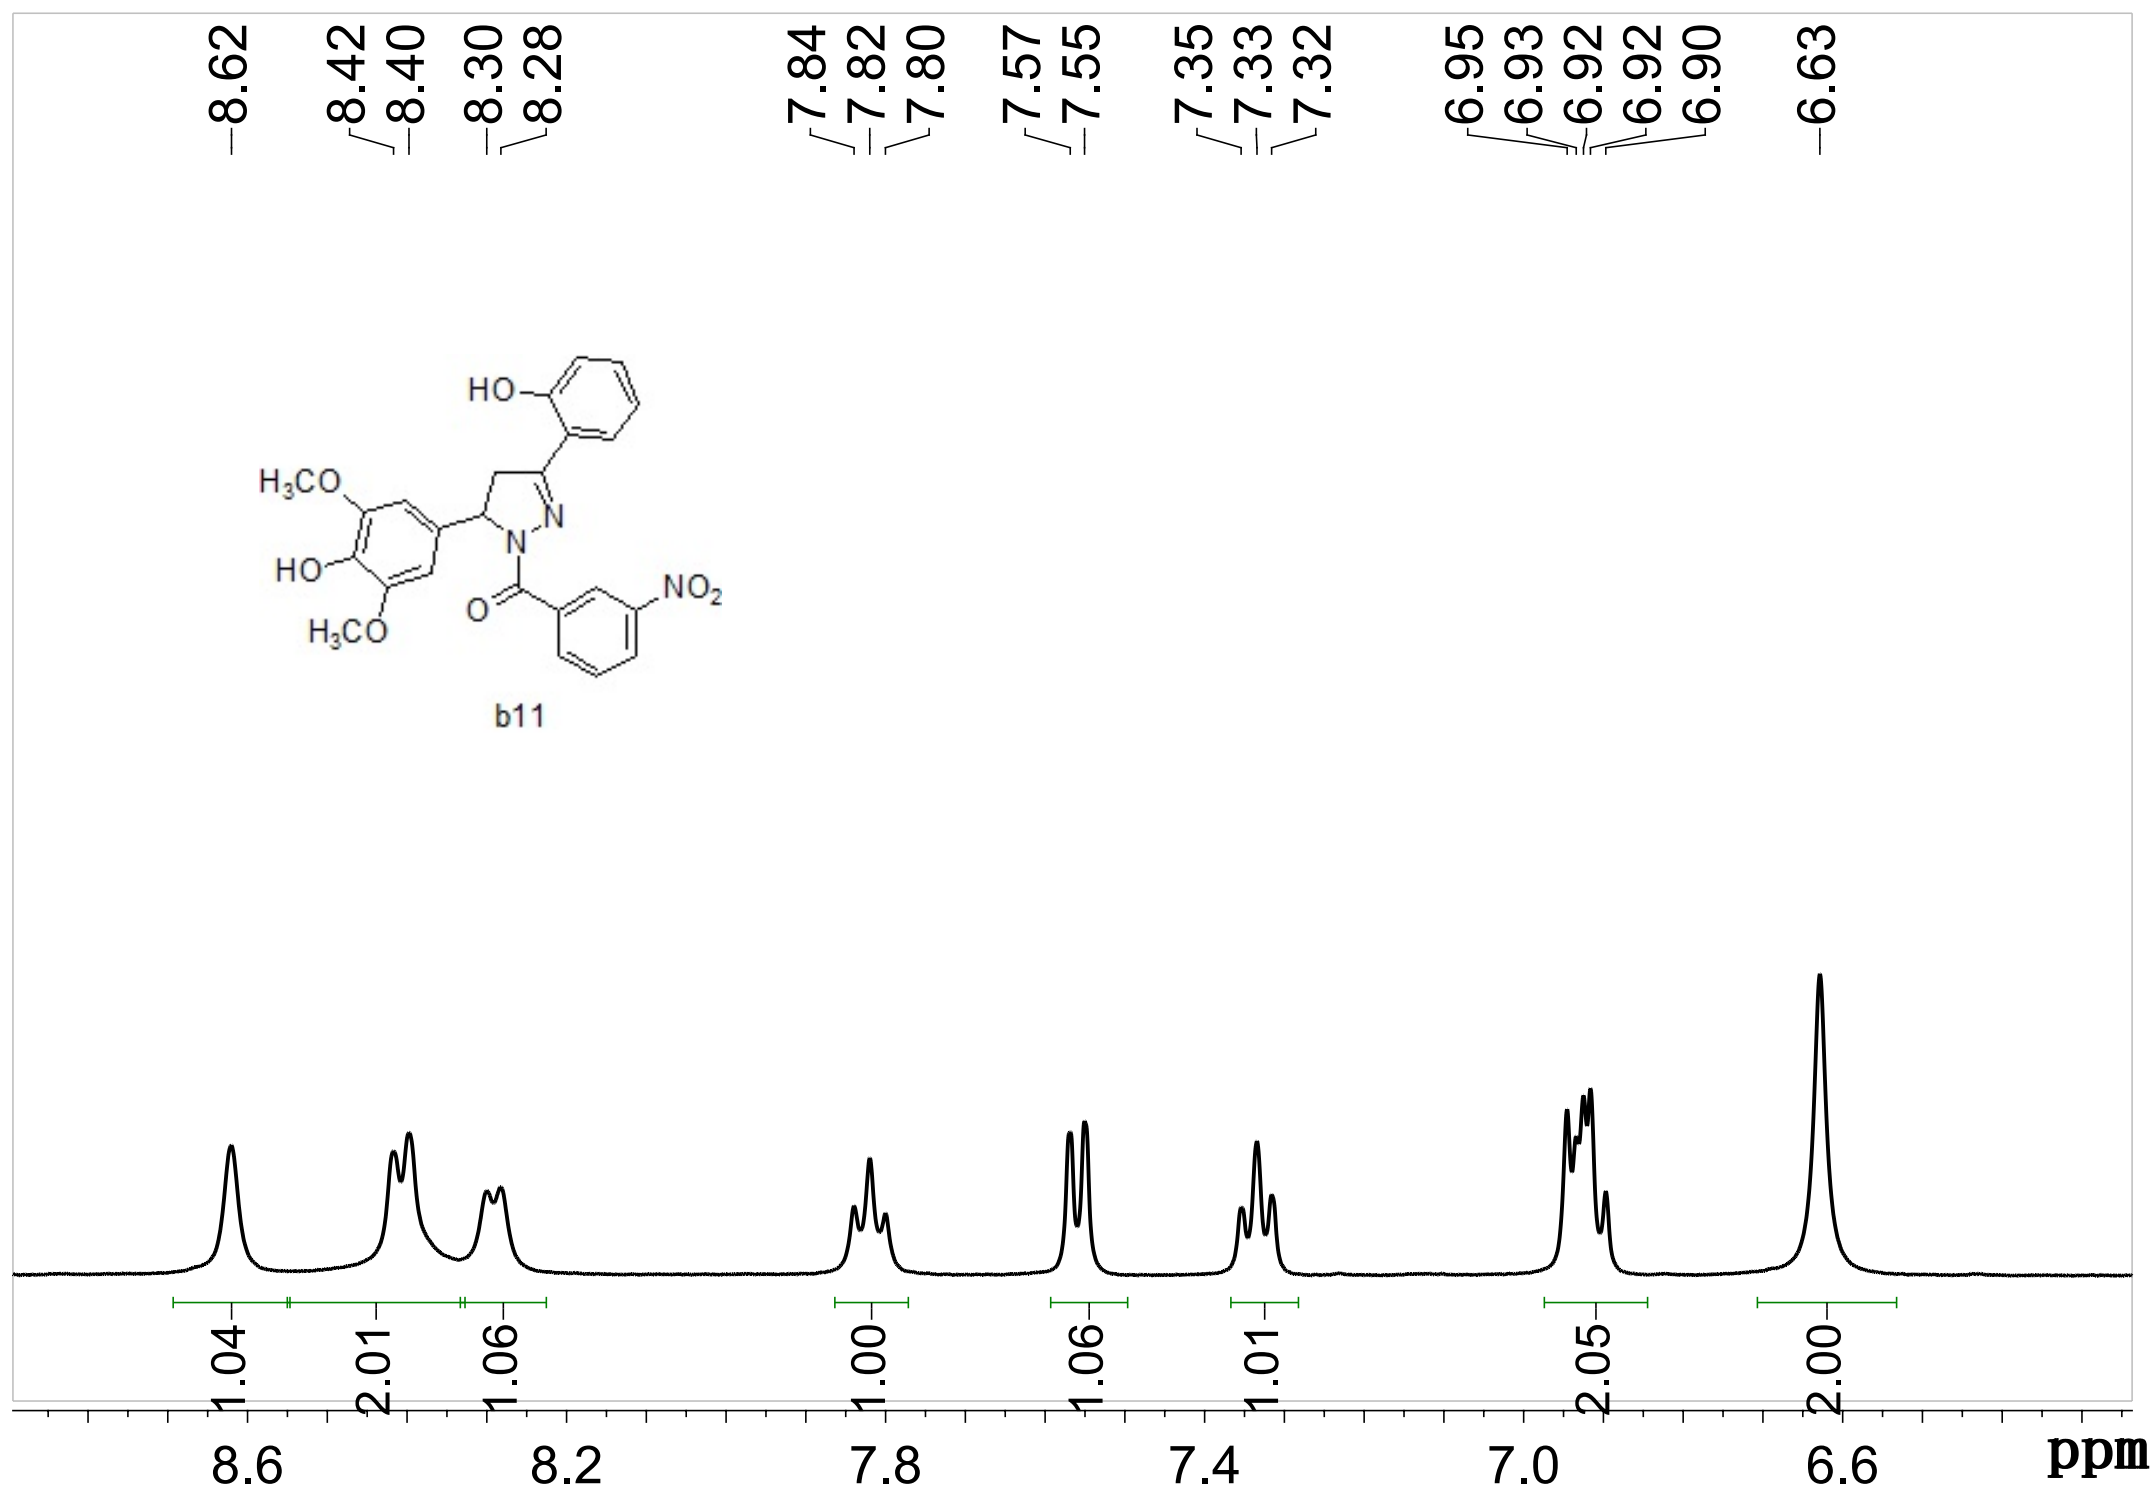

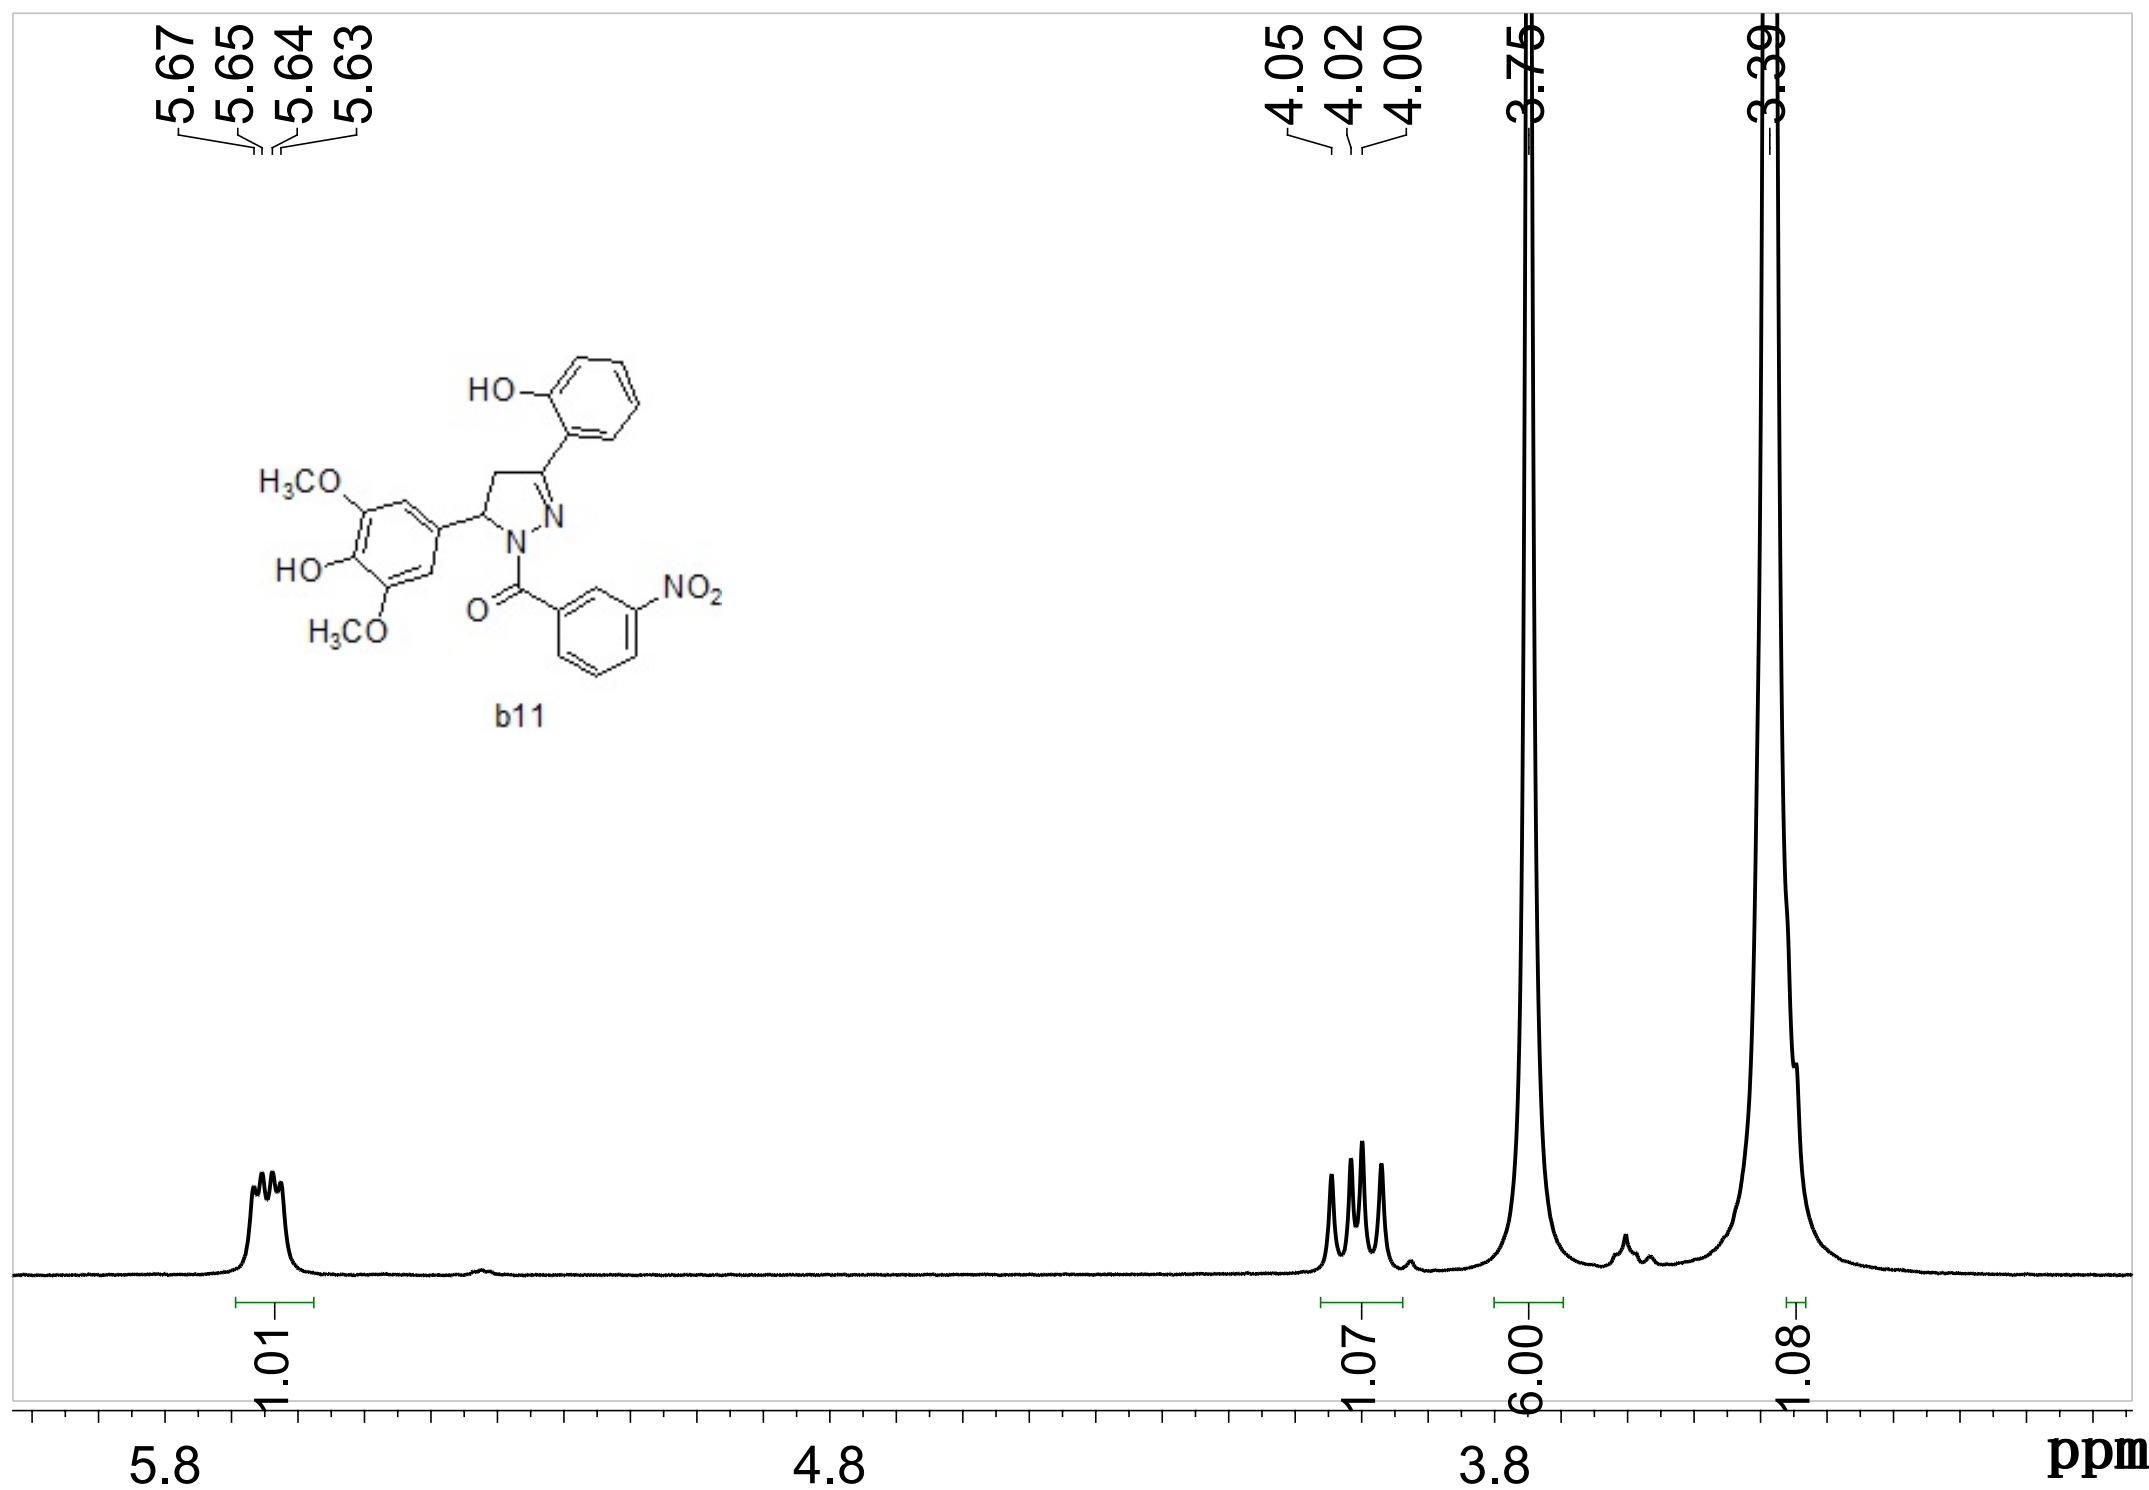

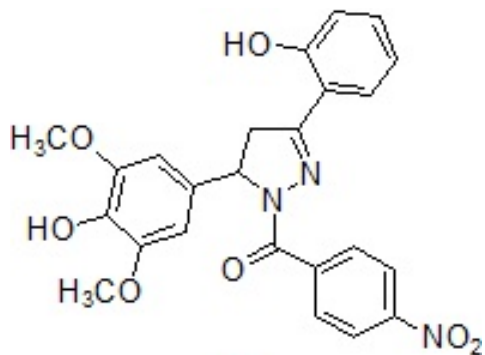

**b12**

Chemical shift values (ppm) for peaks in the spectrum:

- 10.02
- 8.40
- 8.06
- 8.04
- 7.36
- 6.94
- 6.62
- 5.66
- 5.65
- 4.02
- 4.01
- 3.98
- 3.76
- 3.37
- 2.51

Integration values for peaks in the spectrum:

- 1.05
- 1.06
- 2.04
- 2.07
- 1.85
- 1.85
- 2.12
- 2.03
- 1.04
- 1.10
- 6.00

ppm

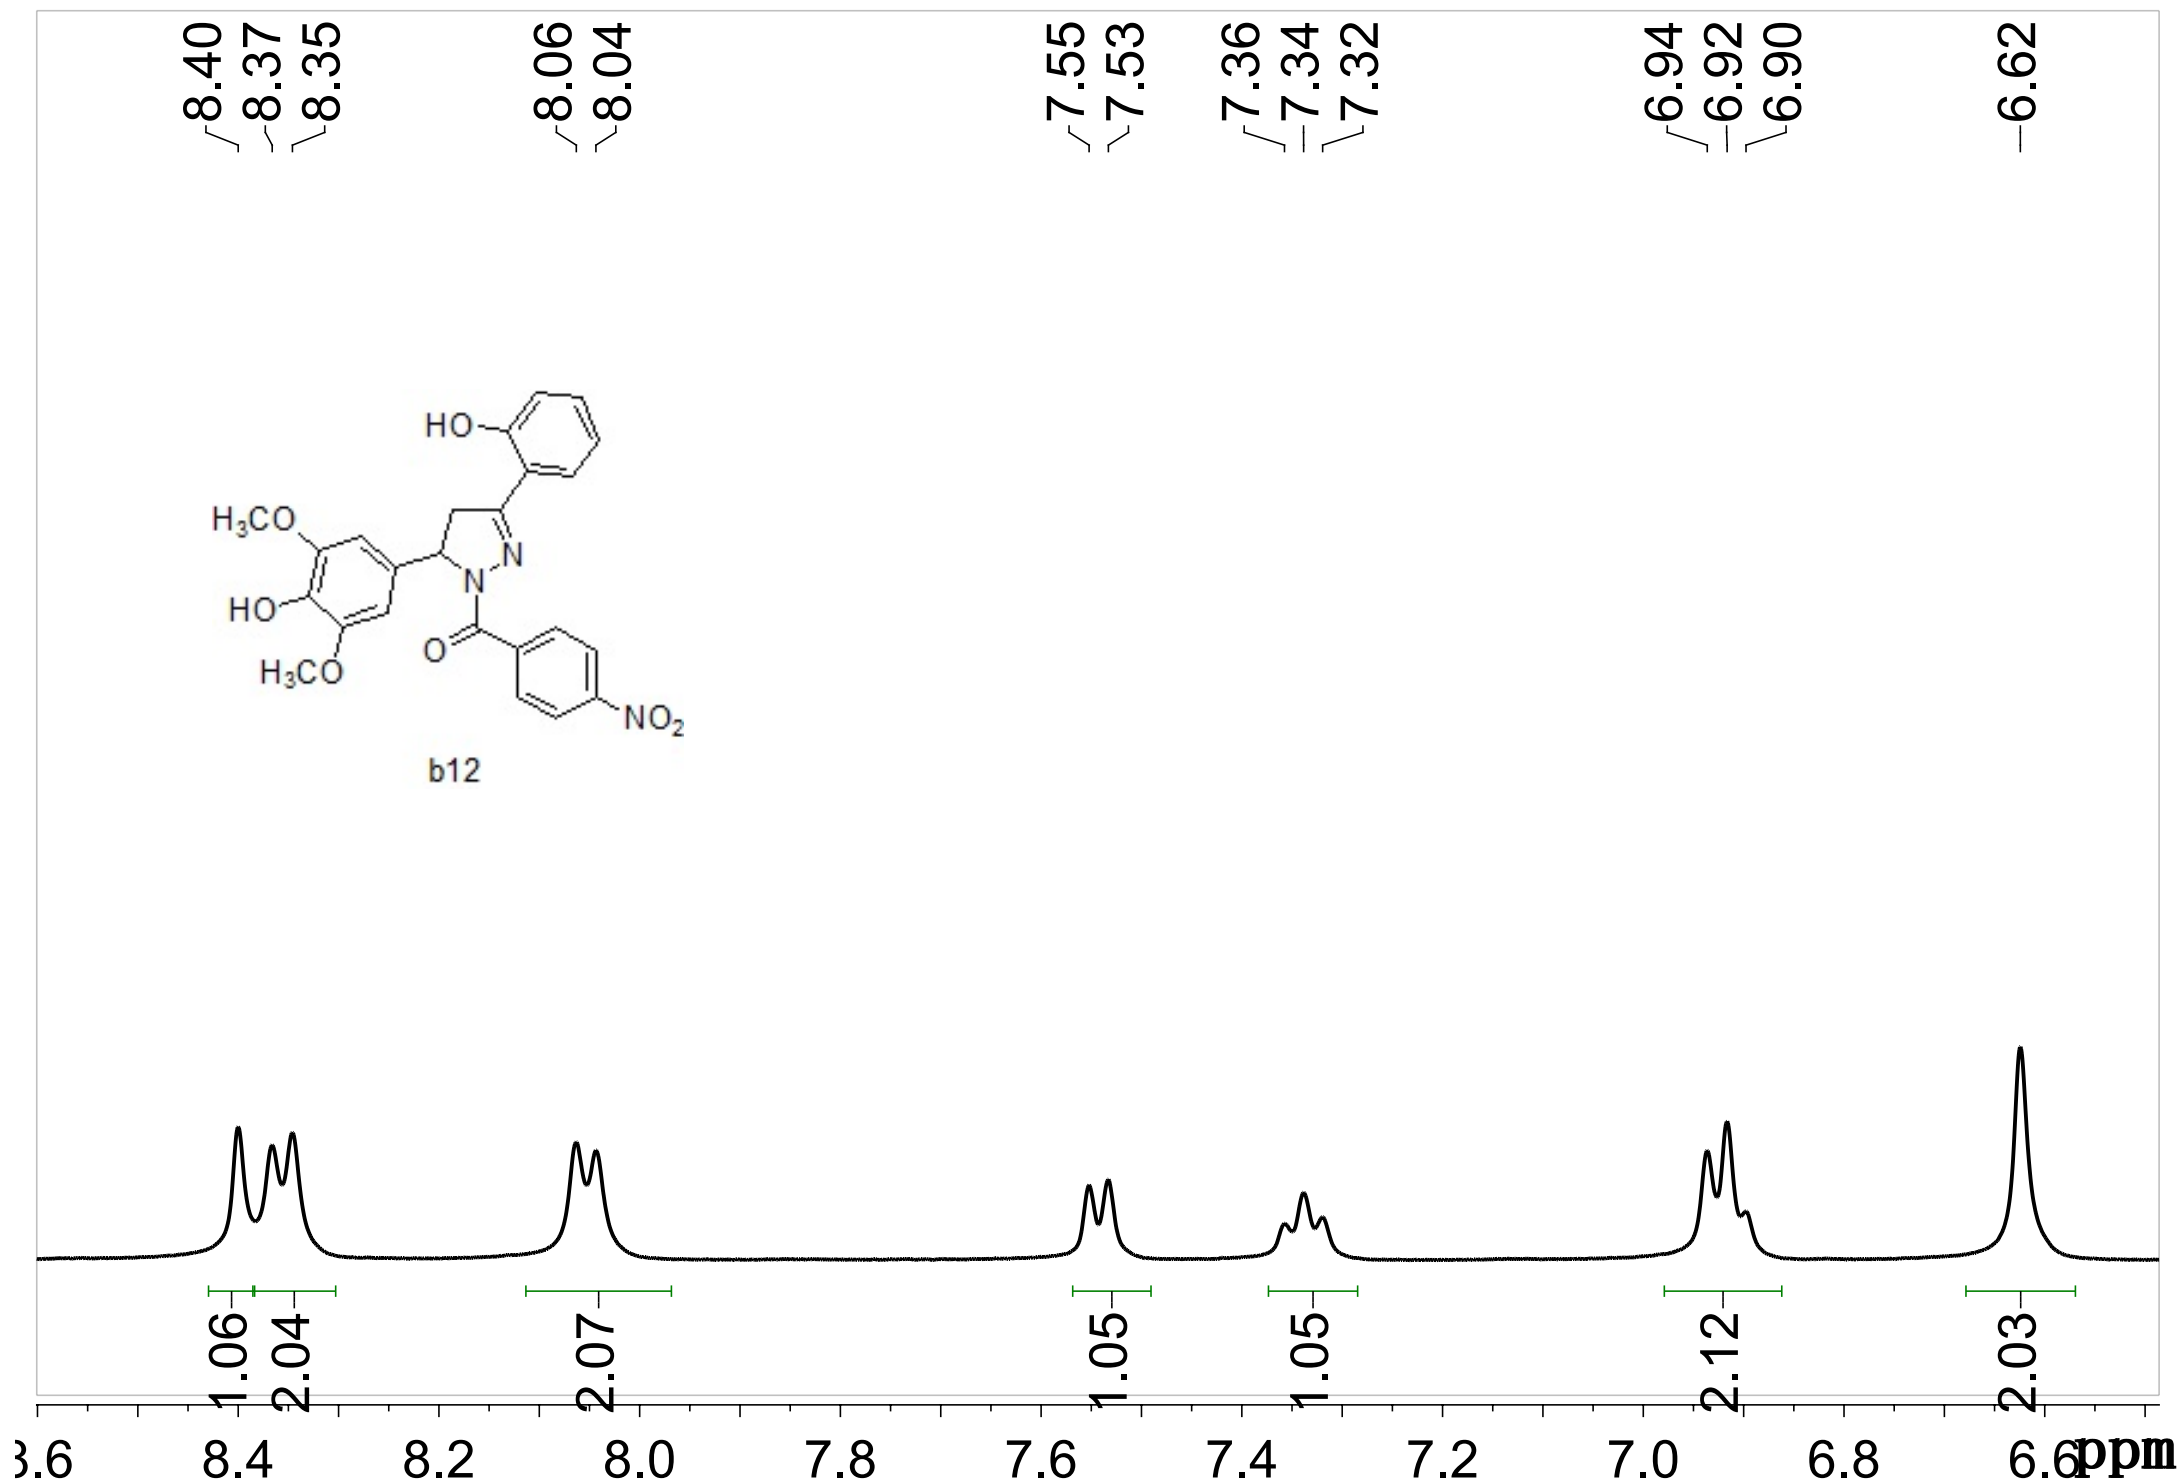



b12

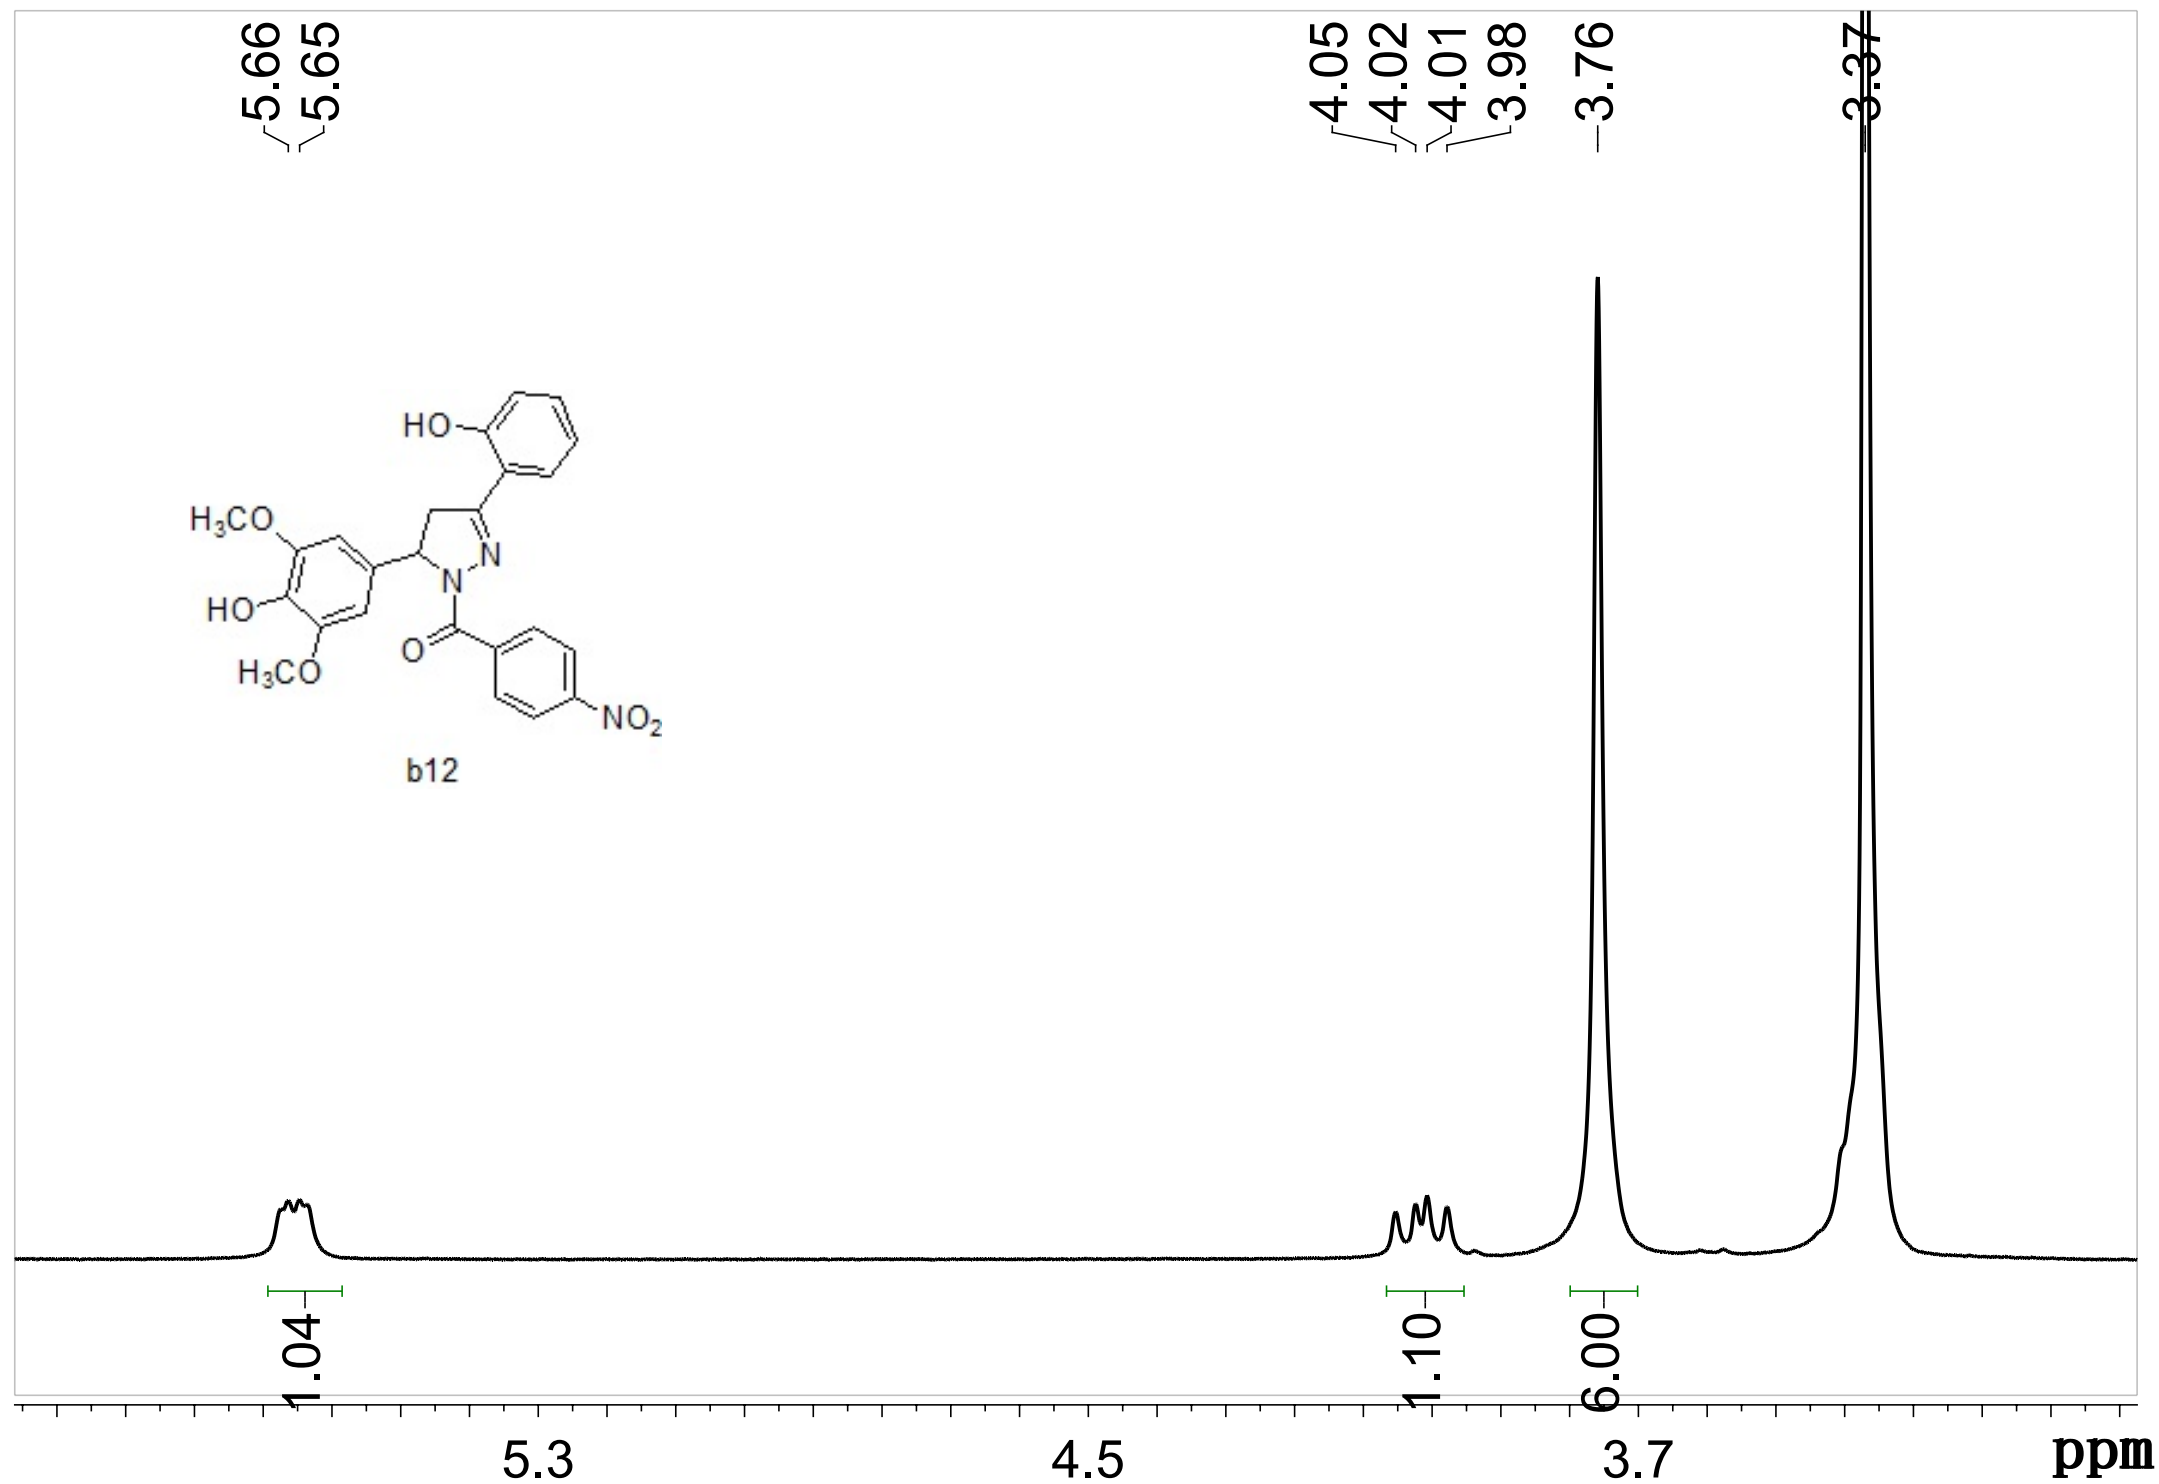

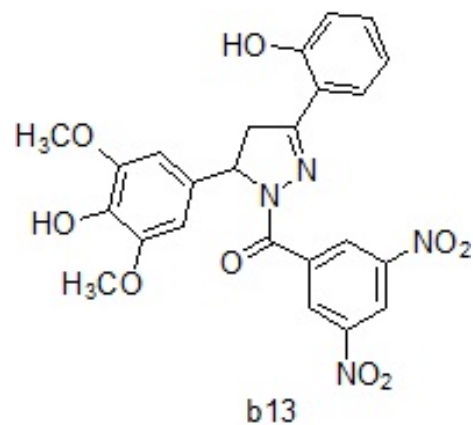

Chemical shifts (ppm):

- 10.06
- 9.07
- 8.97
- 8.39
- 7.62
- 6.92
- 6.64
- 5.67
- 5.66
- 5.65
- 4.63
- 4.61
- 3.75
- 3.43
- 3.41
- 3.38
- 2.51

Integration values:

- 1.07
- 2.06
- 0.98
- 1.10
- 1.11
- 1.11
- 1.15
- 1.01
- 2.17
- 1.10
- 1.14
- 6.00
- 1.01

ppm

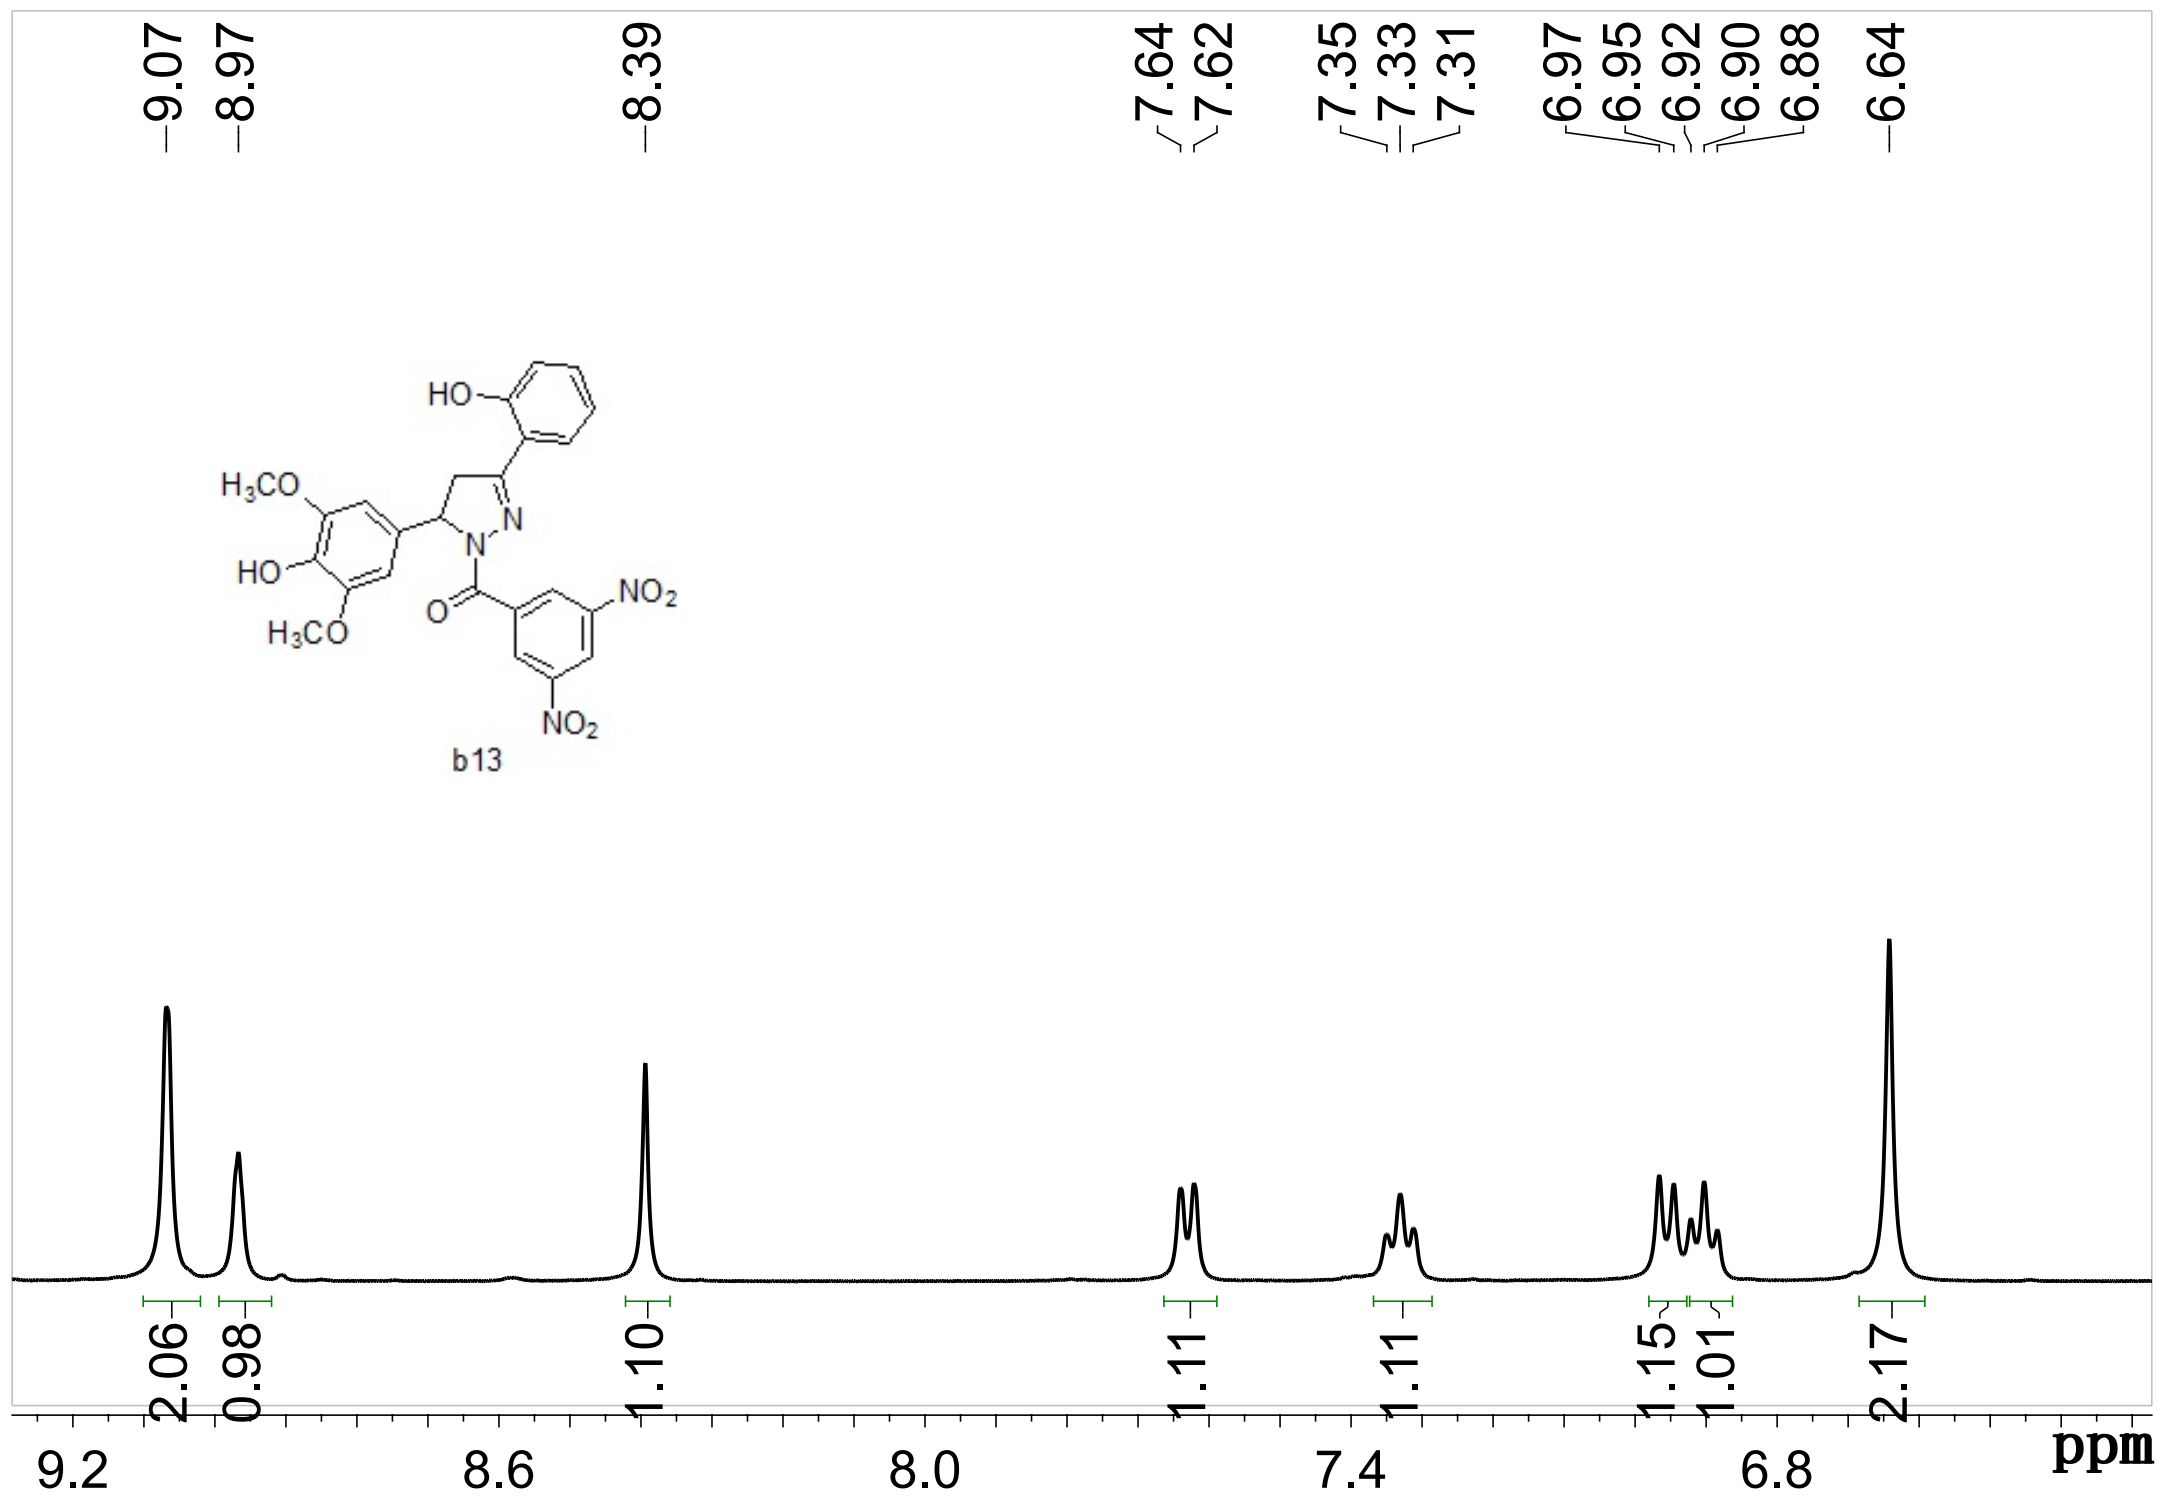

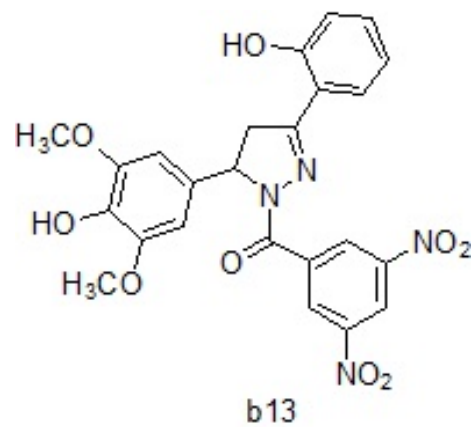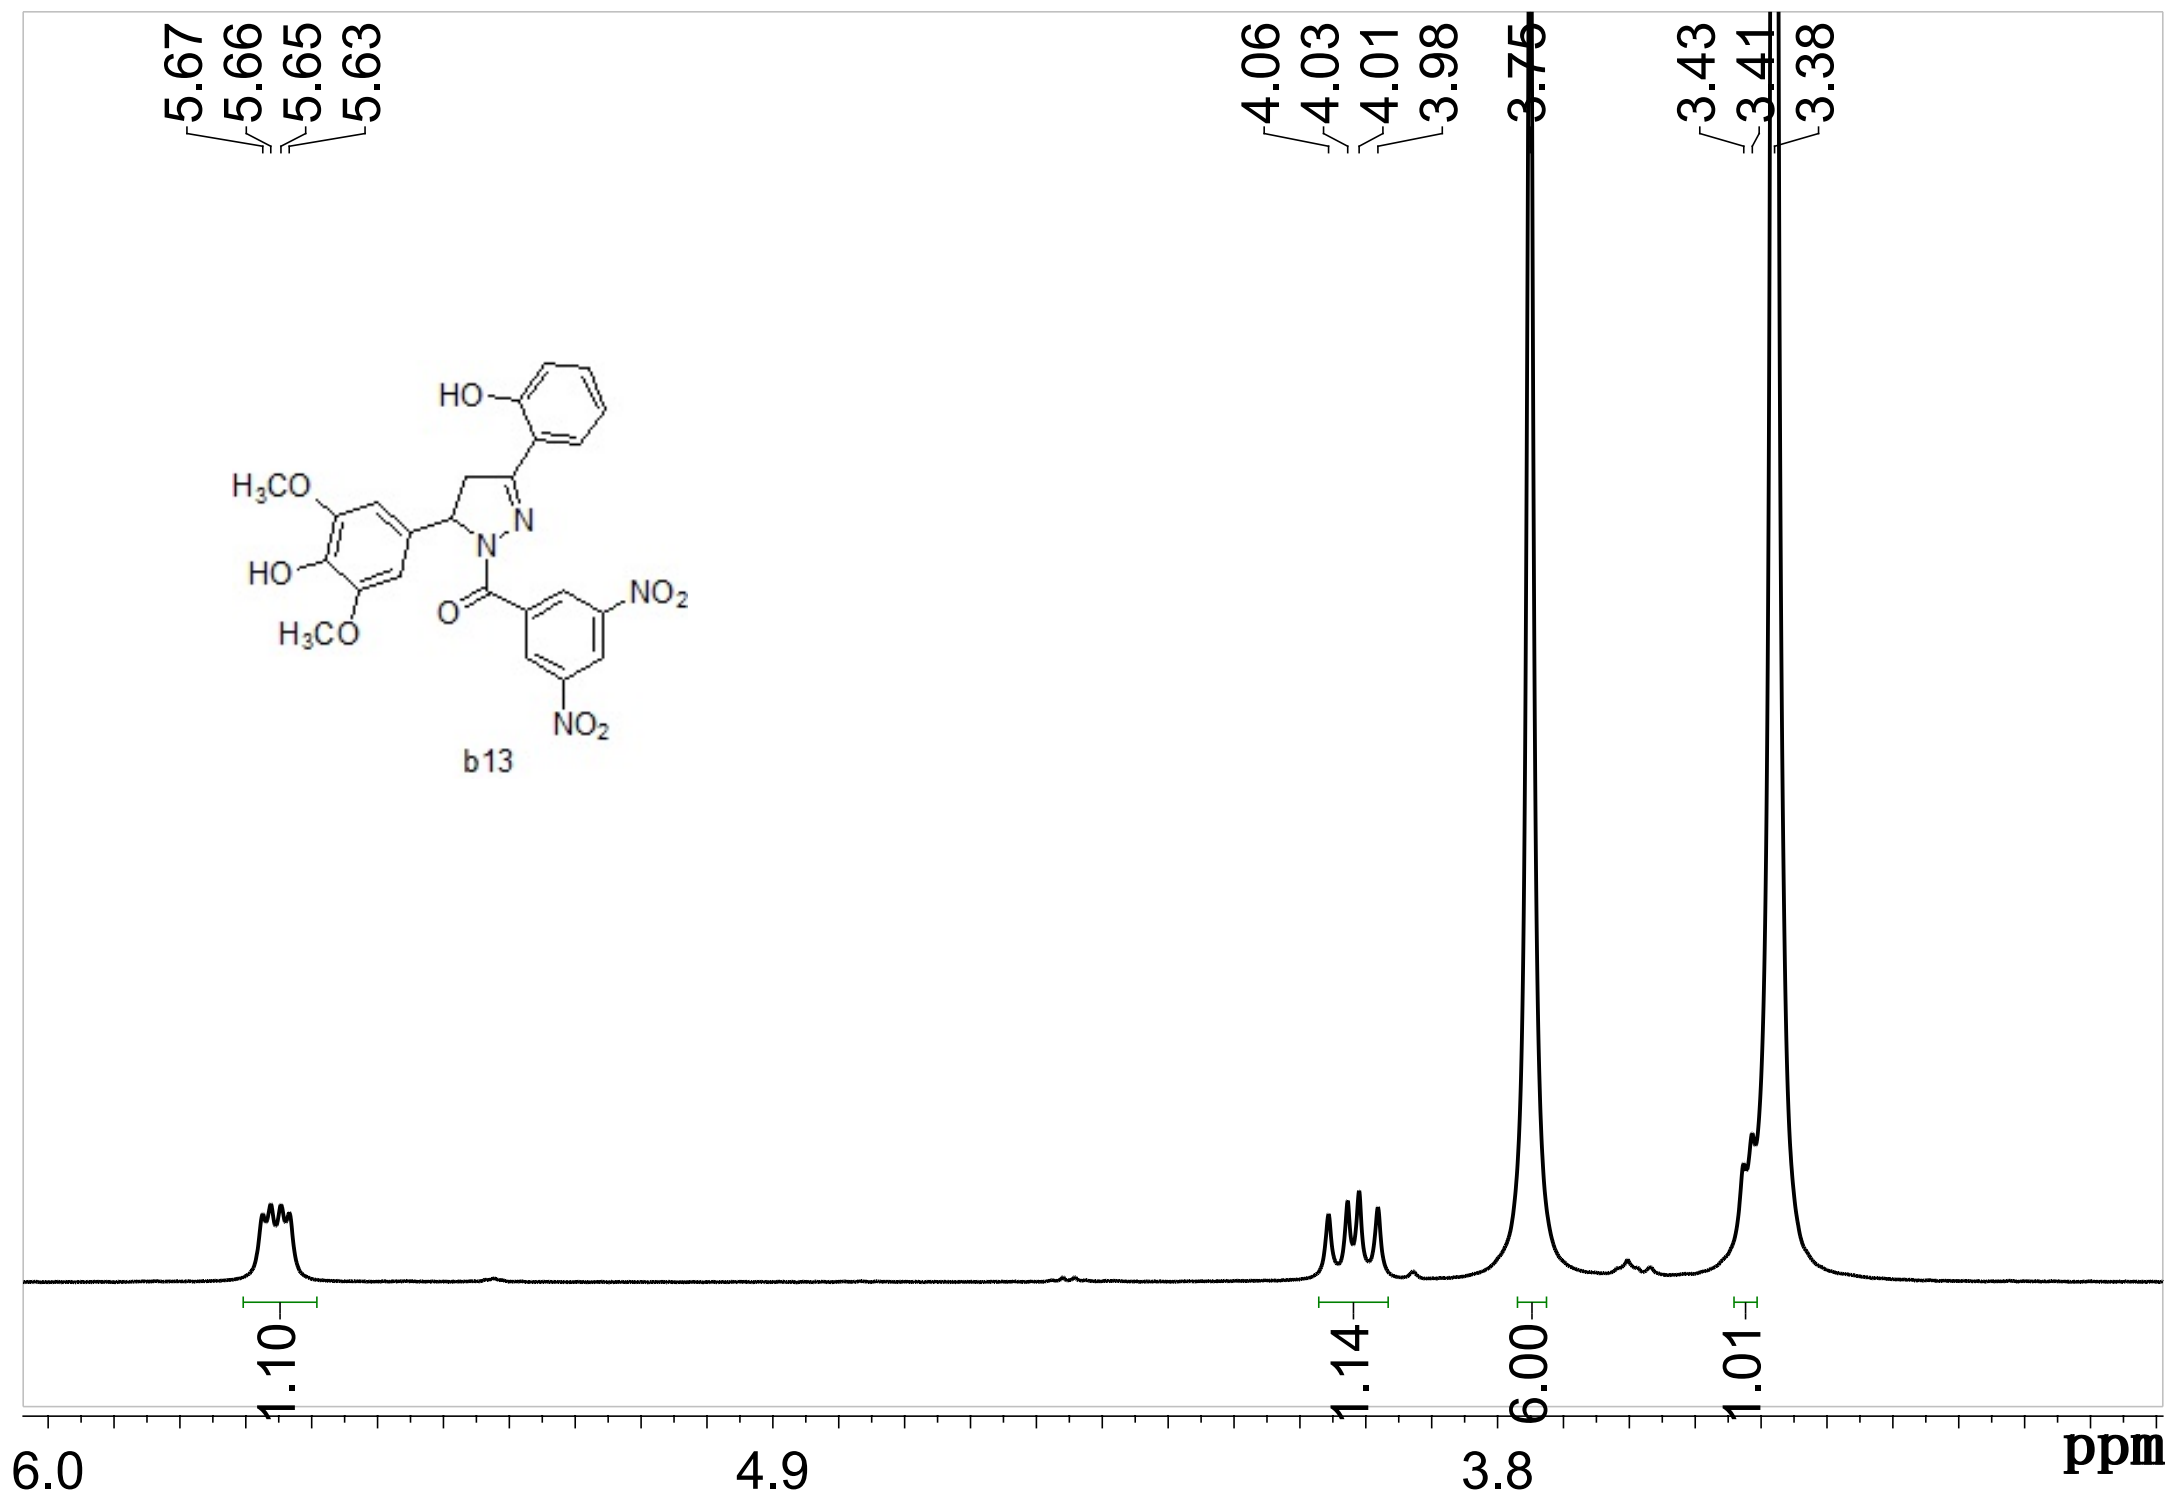



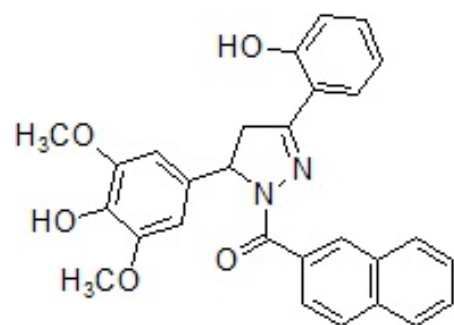

b14

Chemical shift values (ppm) for compound b14:

- 10.13
- 8.38
- 7.67
- 7.63
- 7.51
- 7.34
- 6.94
- 6.65
- 5.71
- 5.70
- 5.68
- 5.67
- 3.75
- 3.41
- 3.39
- 3.36
- 3.34
- 2.50

Integration values for compound b14:

- 1.10
- 1.02
- 1.02
- 2.10
- 0.86
- 2.18
- 1.09
- 1.13
- 2.12
- 1.93
- 1.04
- 1.08
- 6.00
- 1.04

9.0

6.0

3.0

0.0

ppm



b14

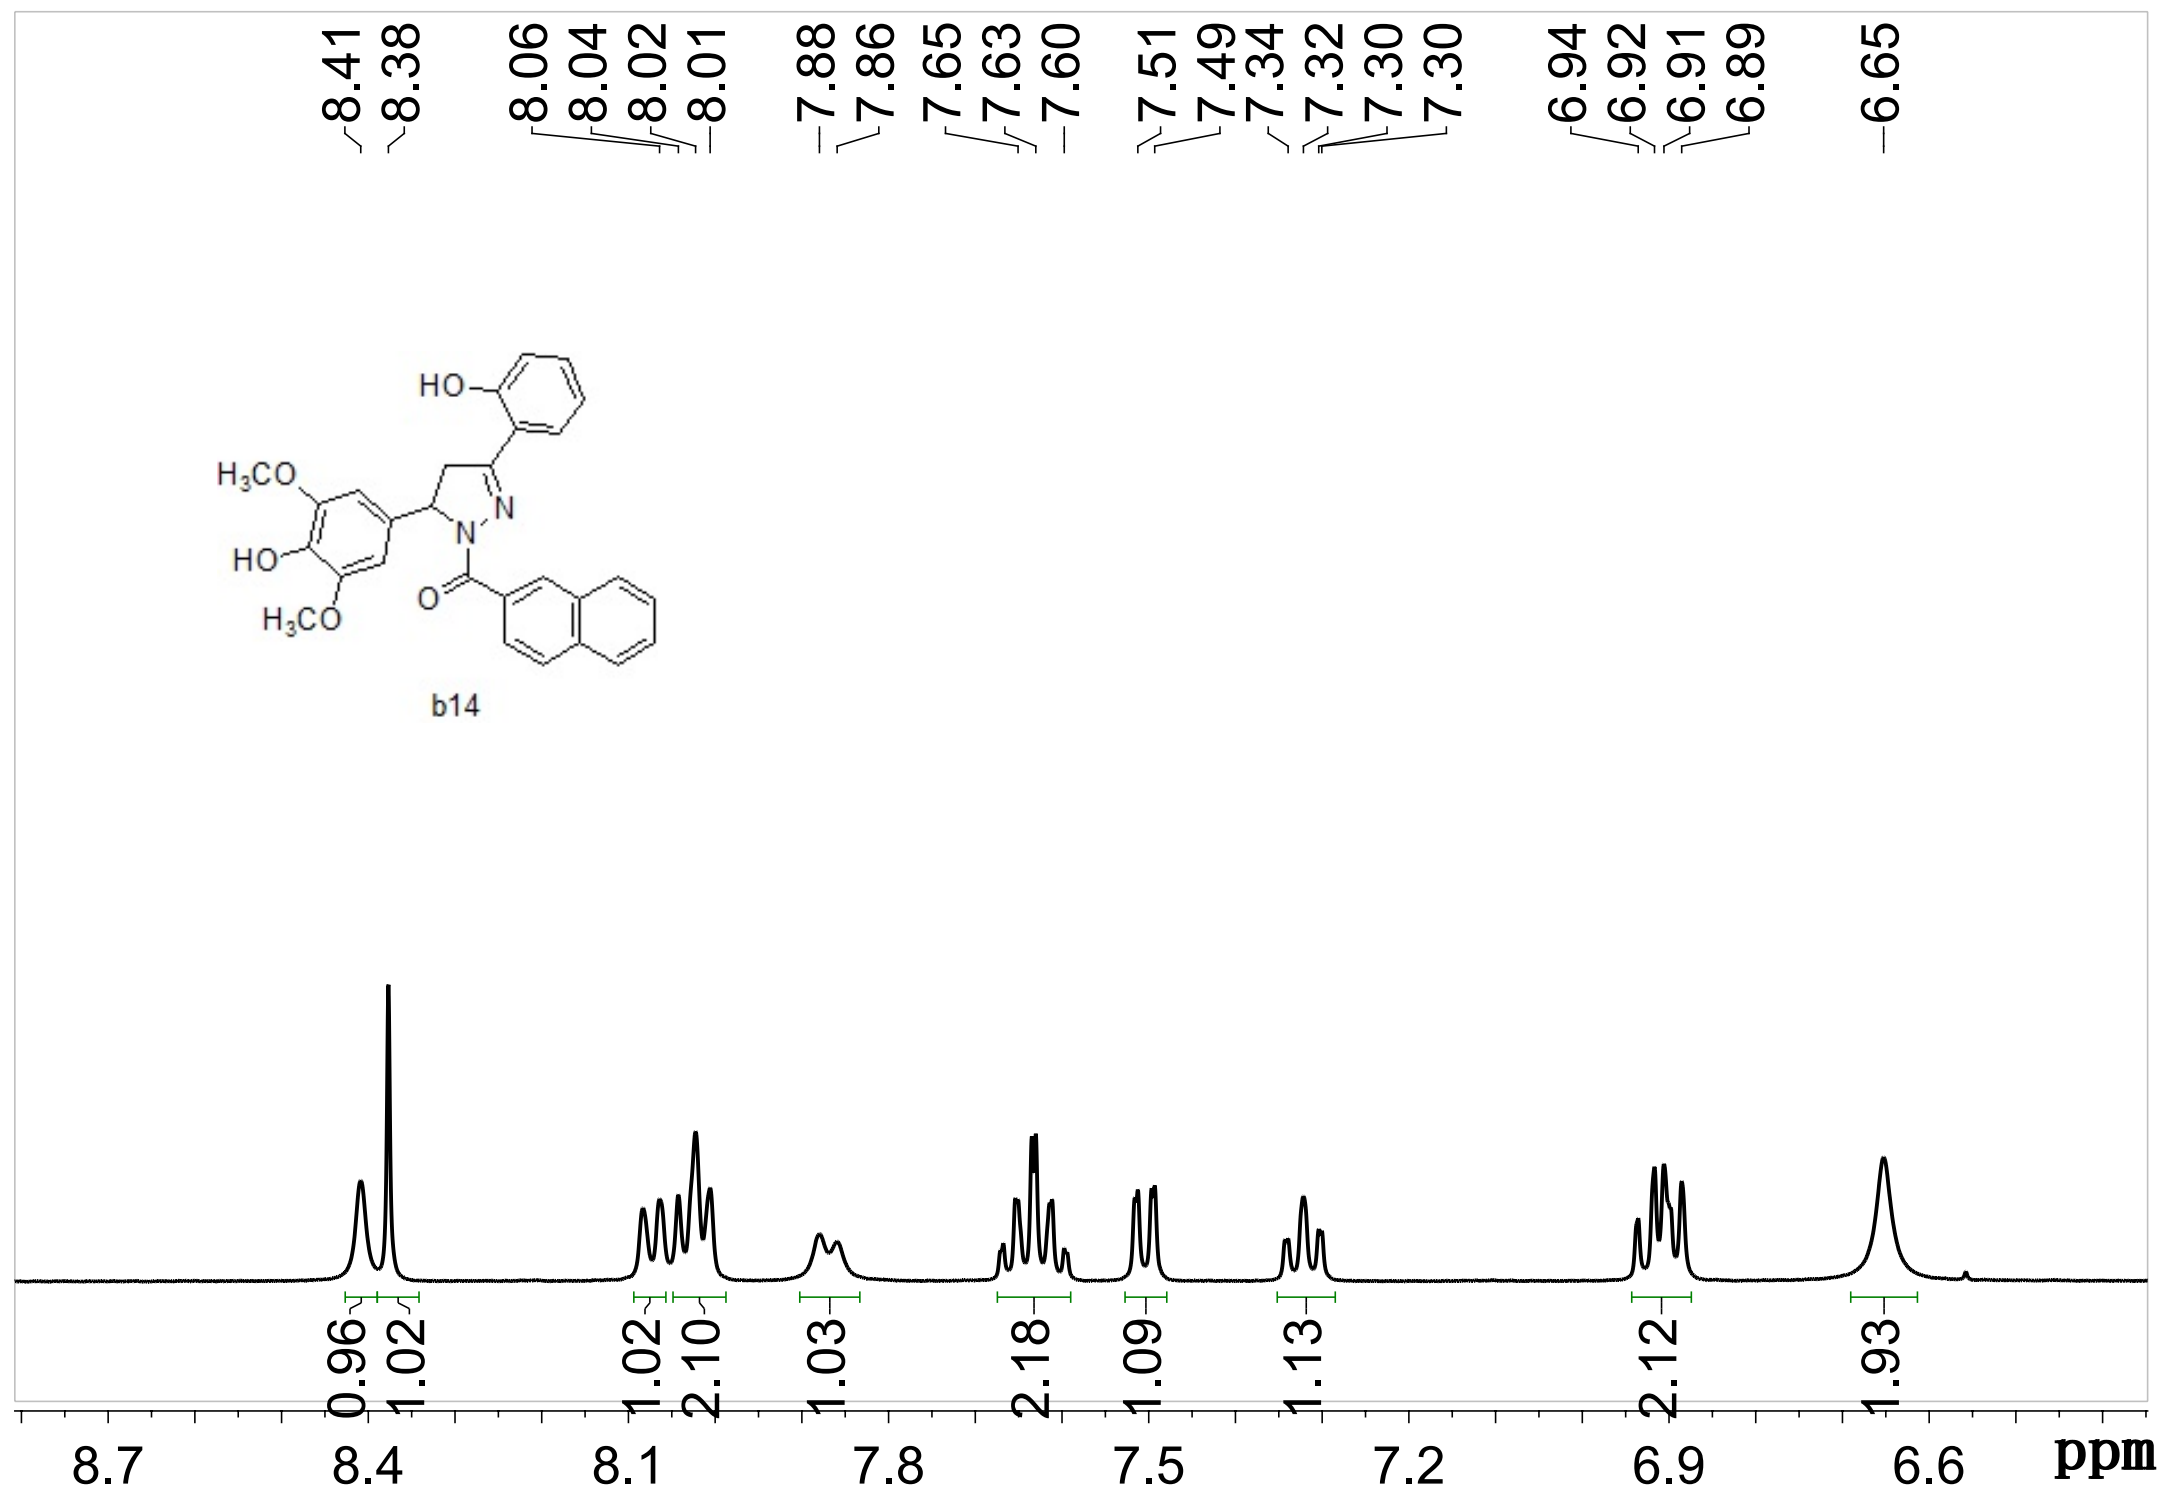

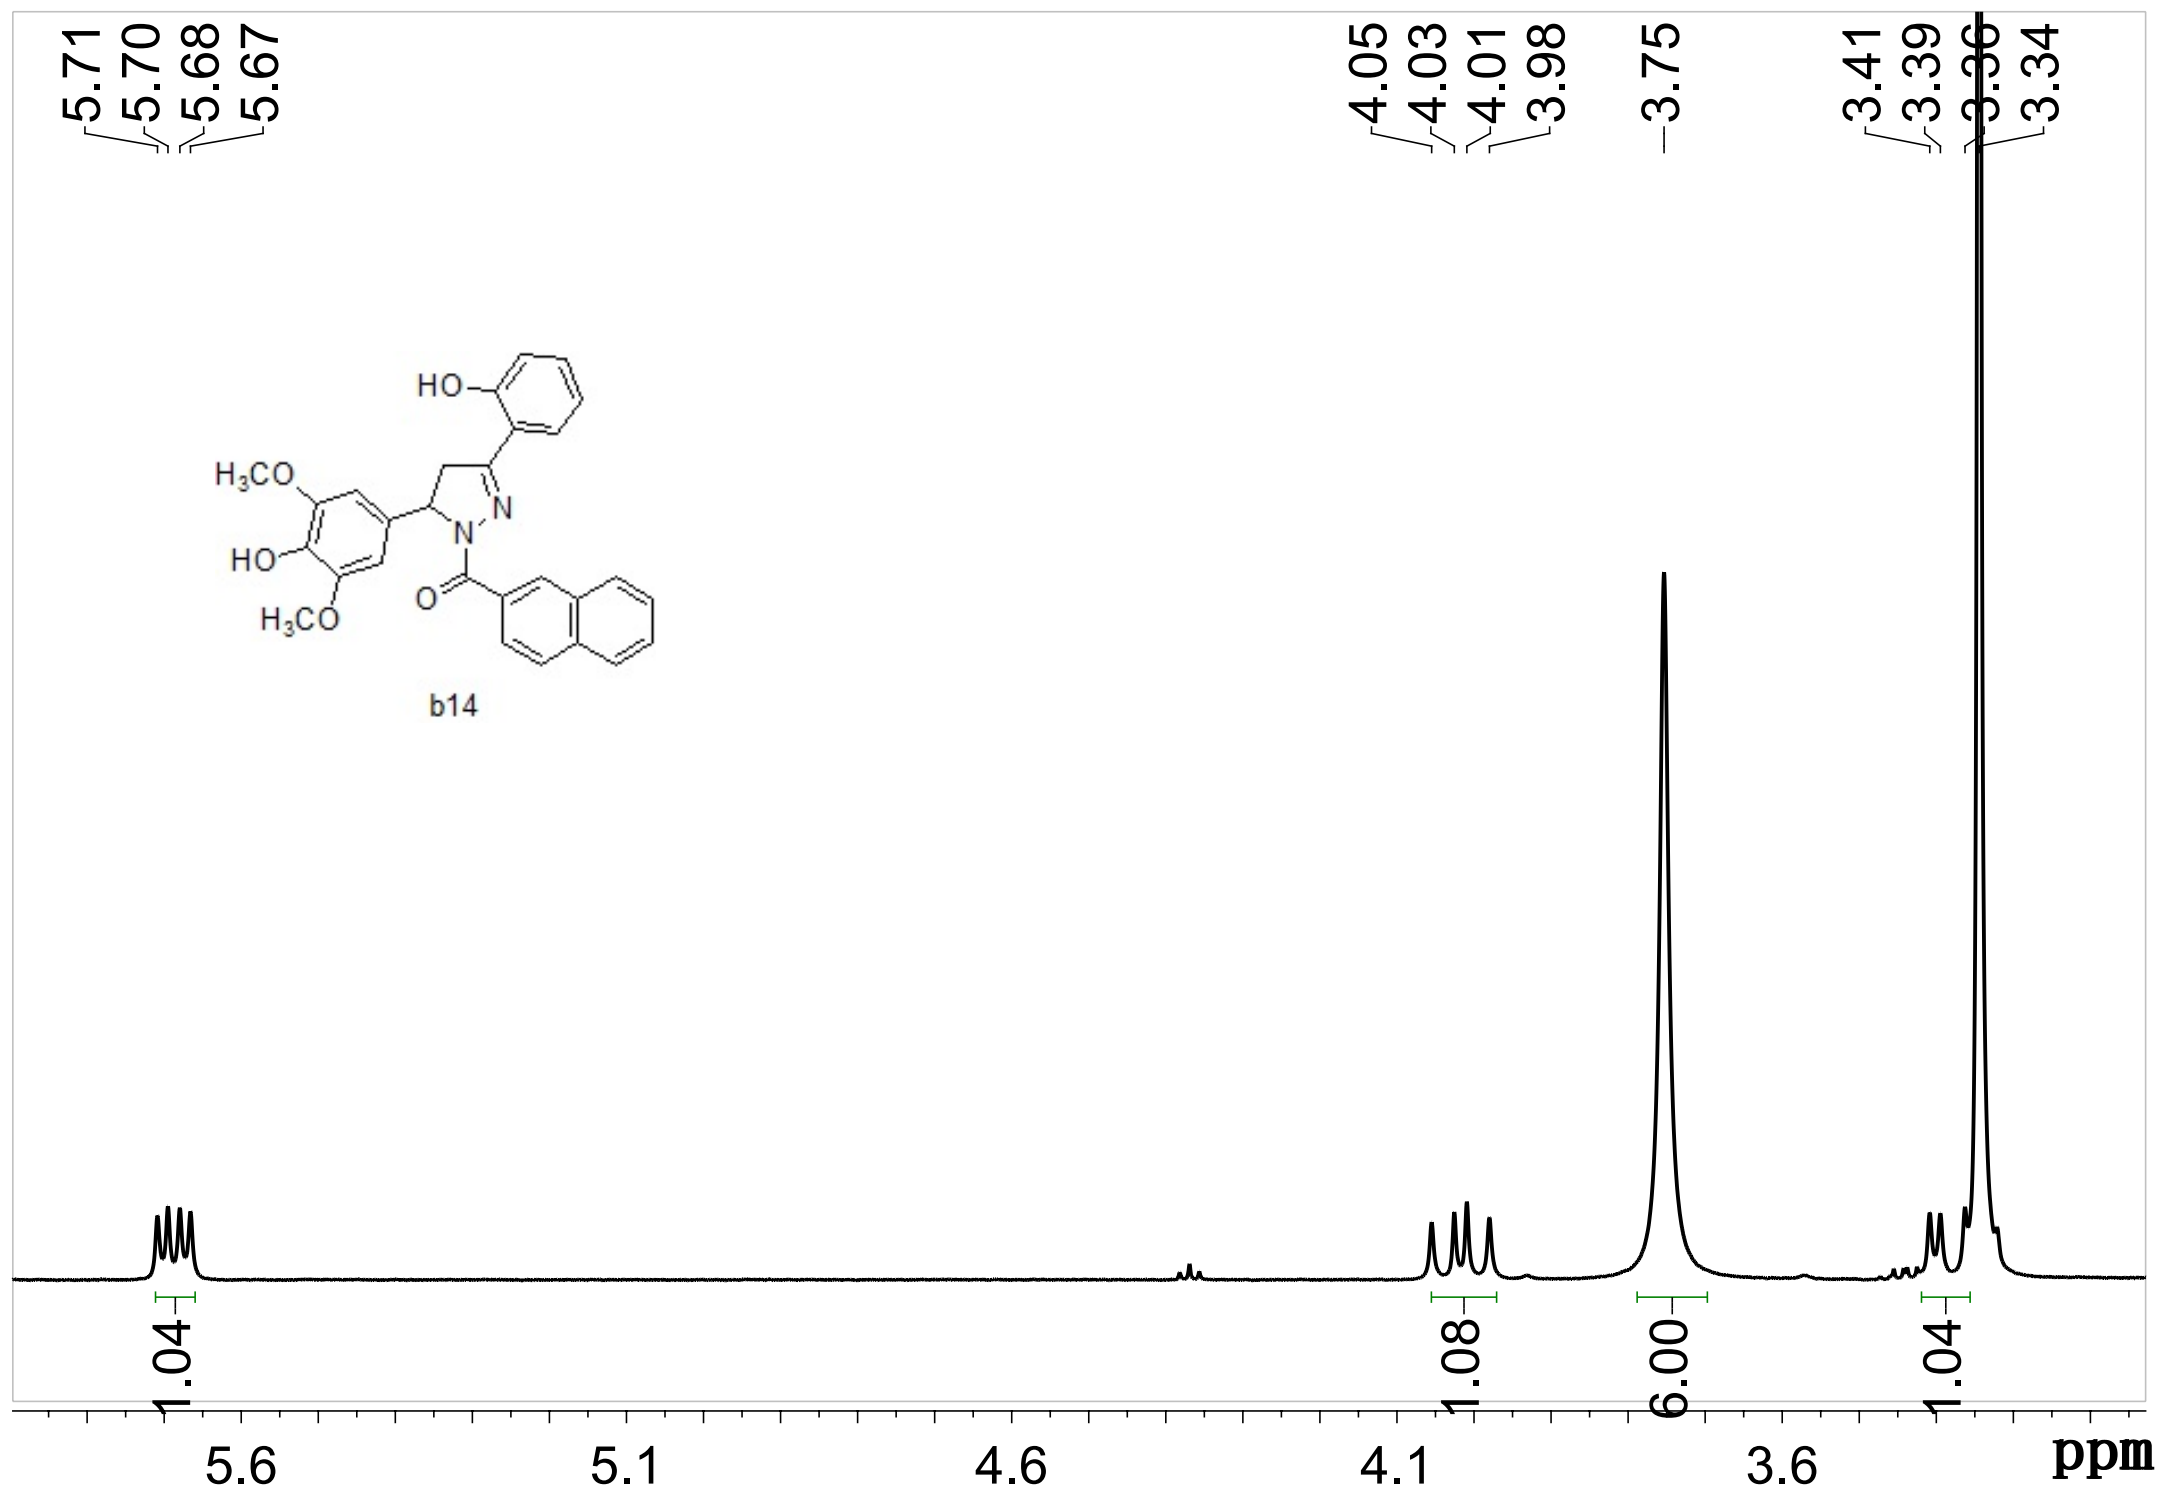

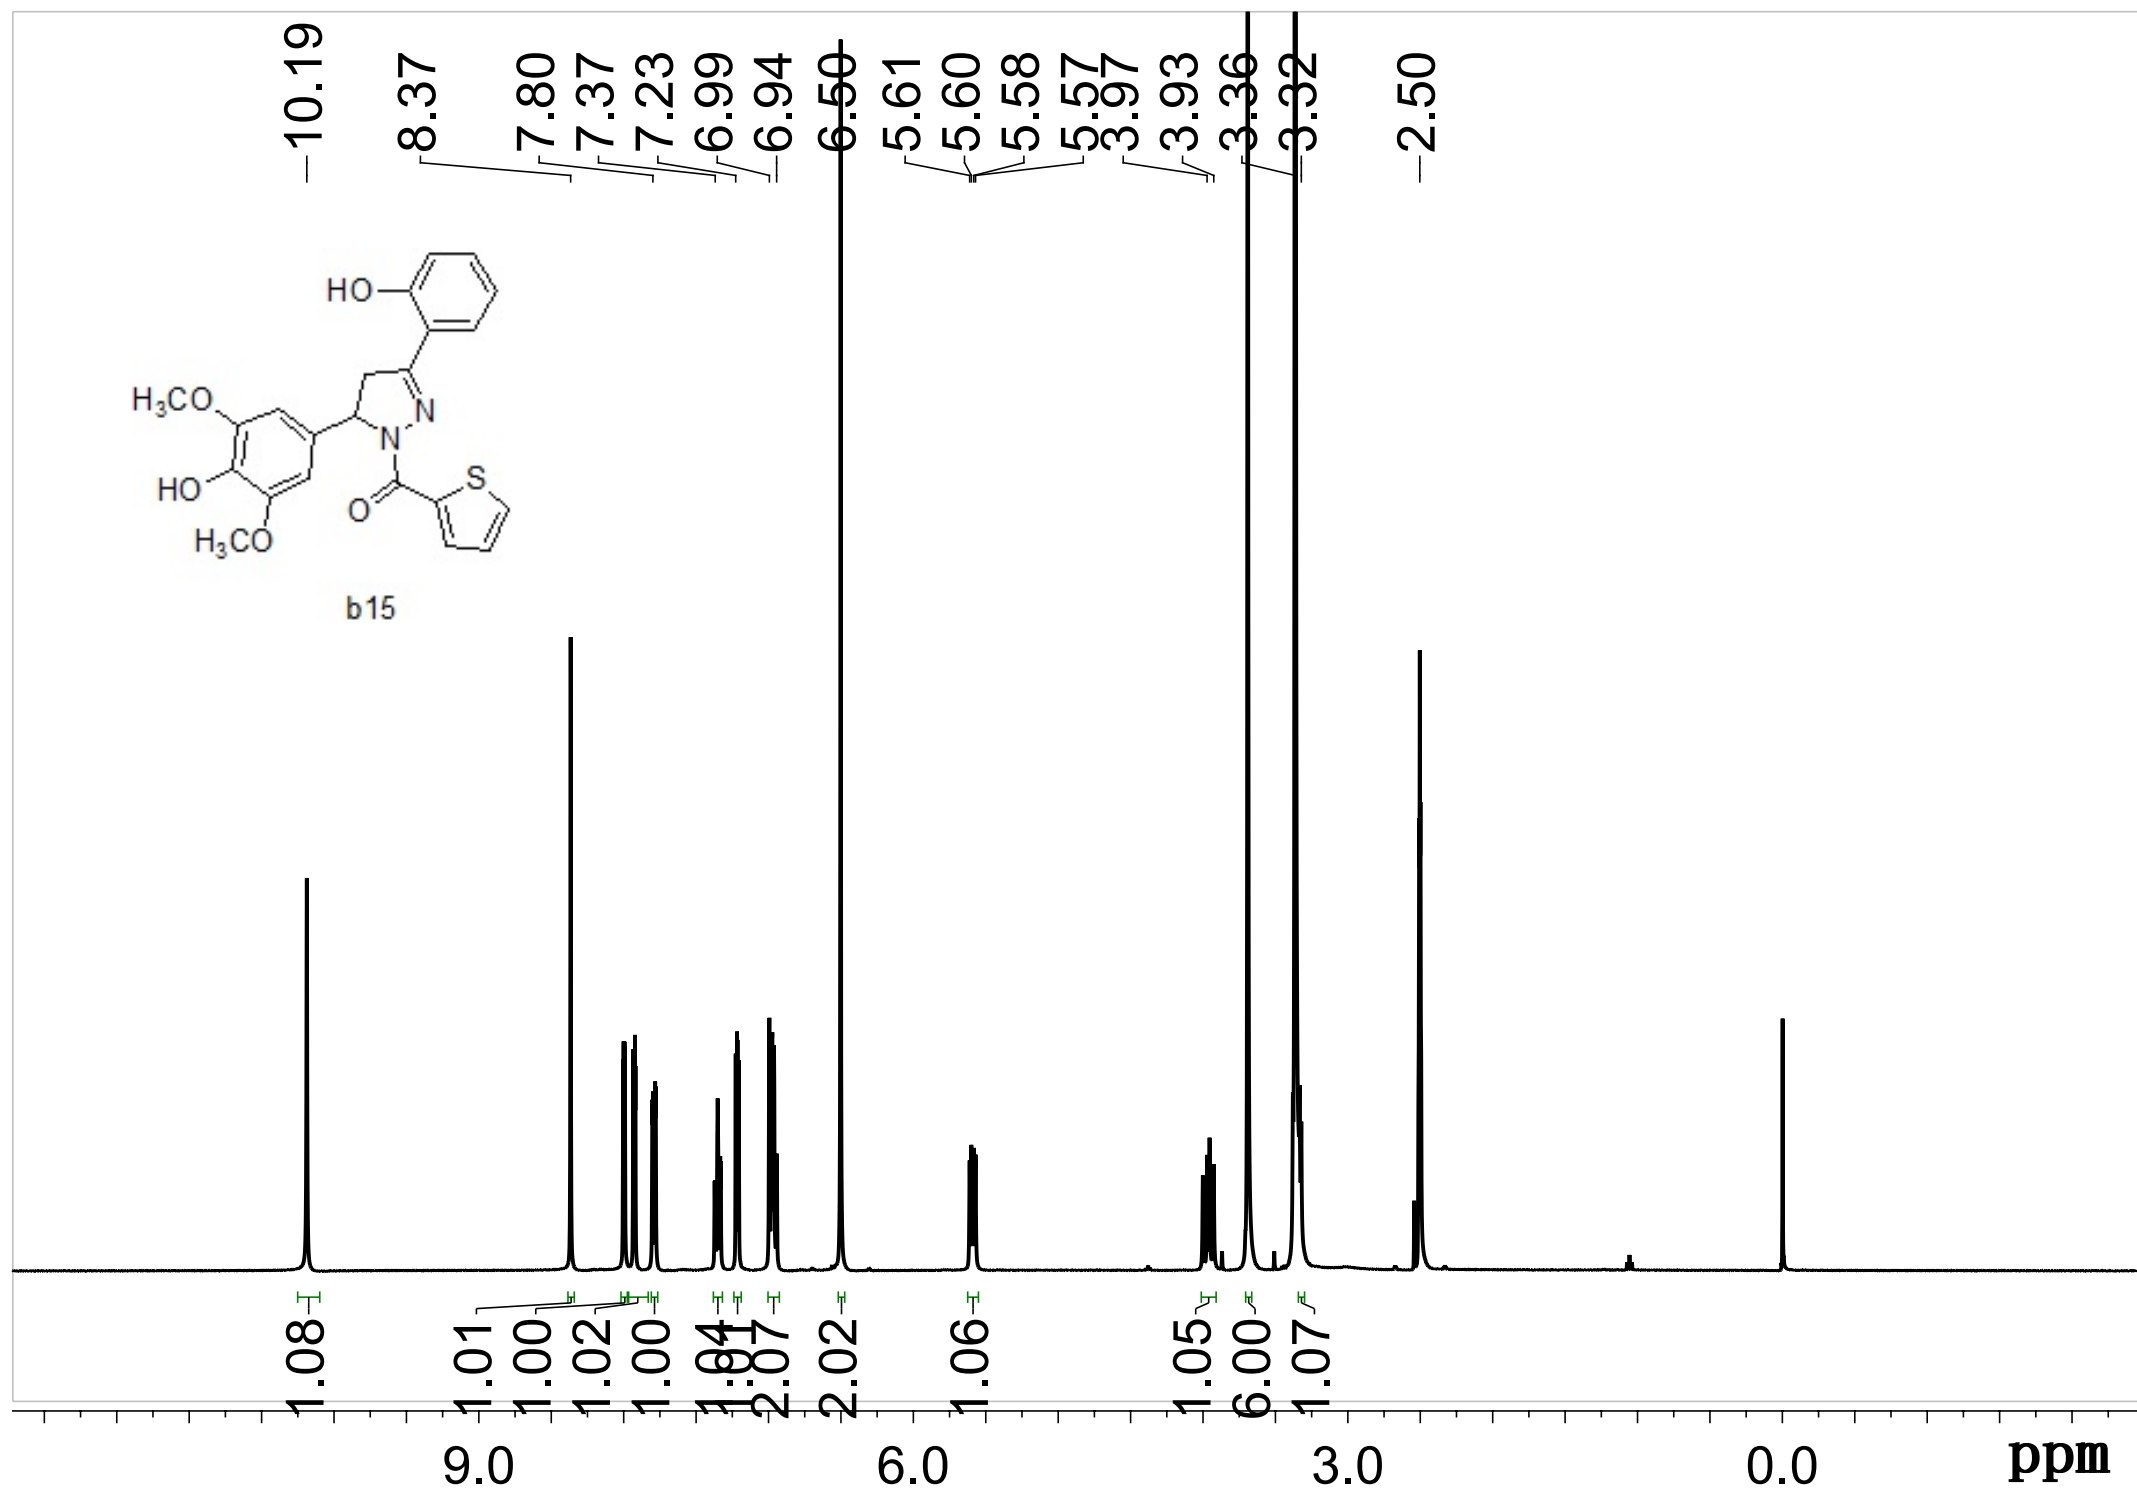

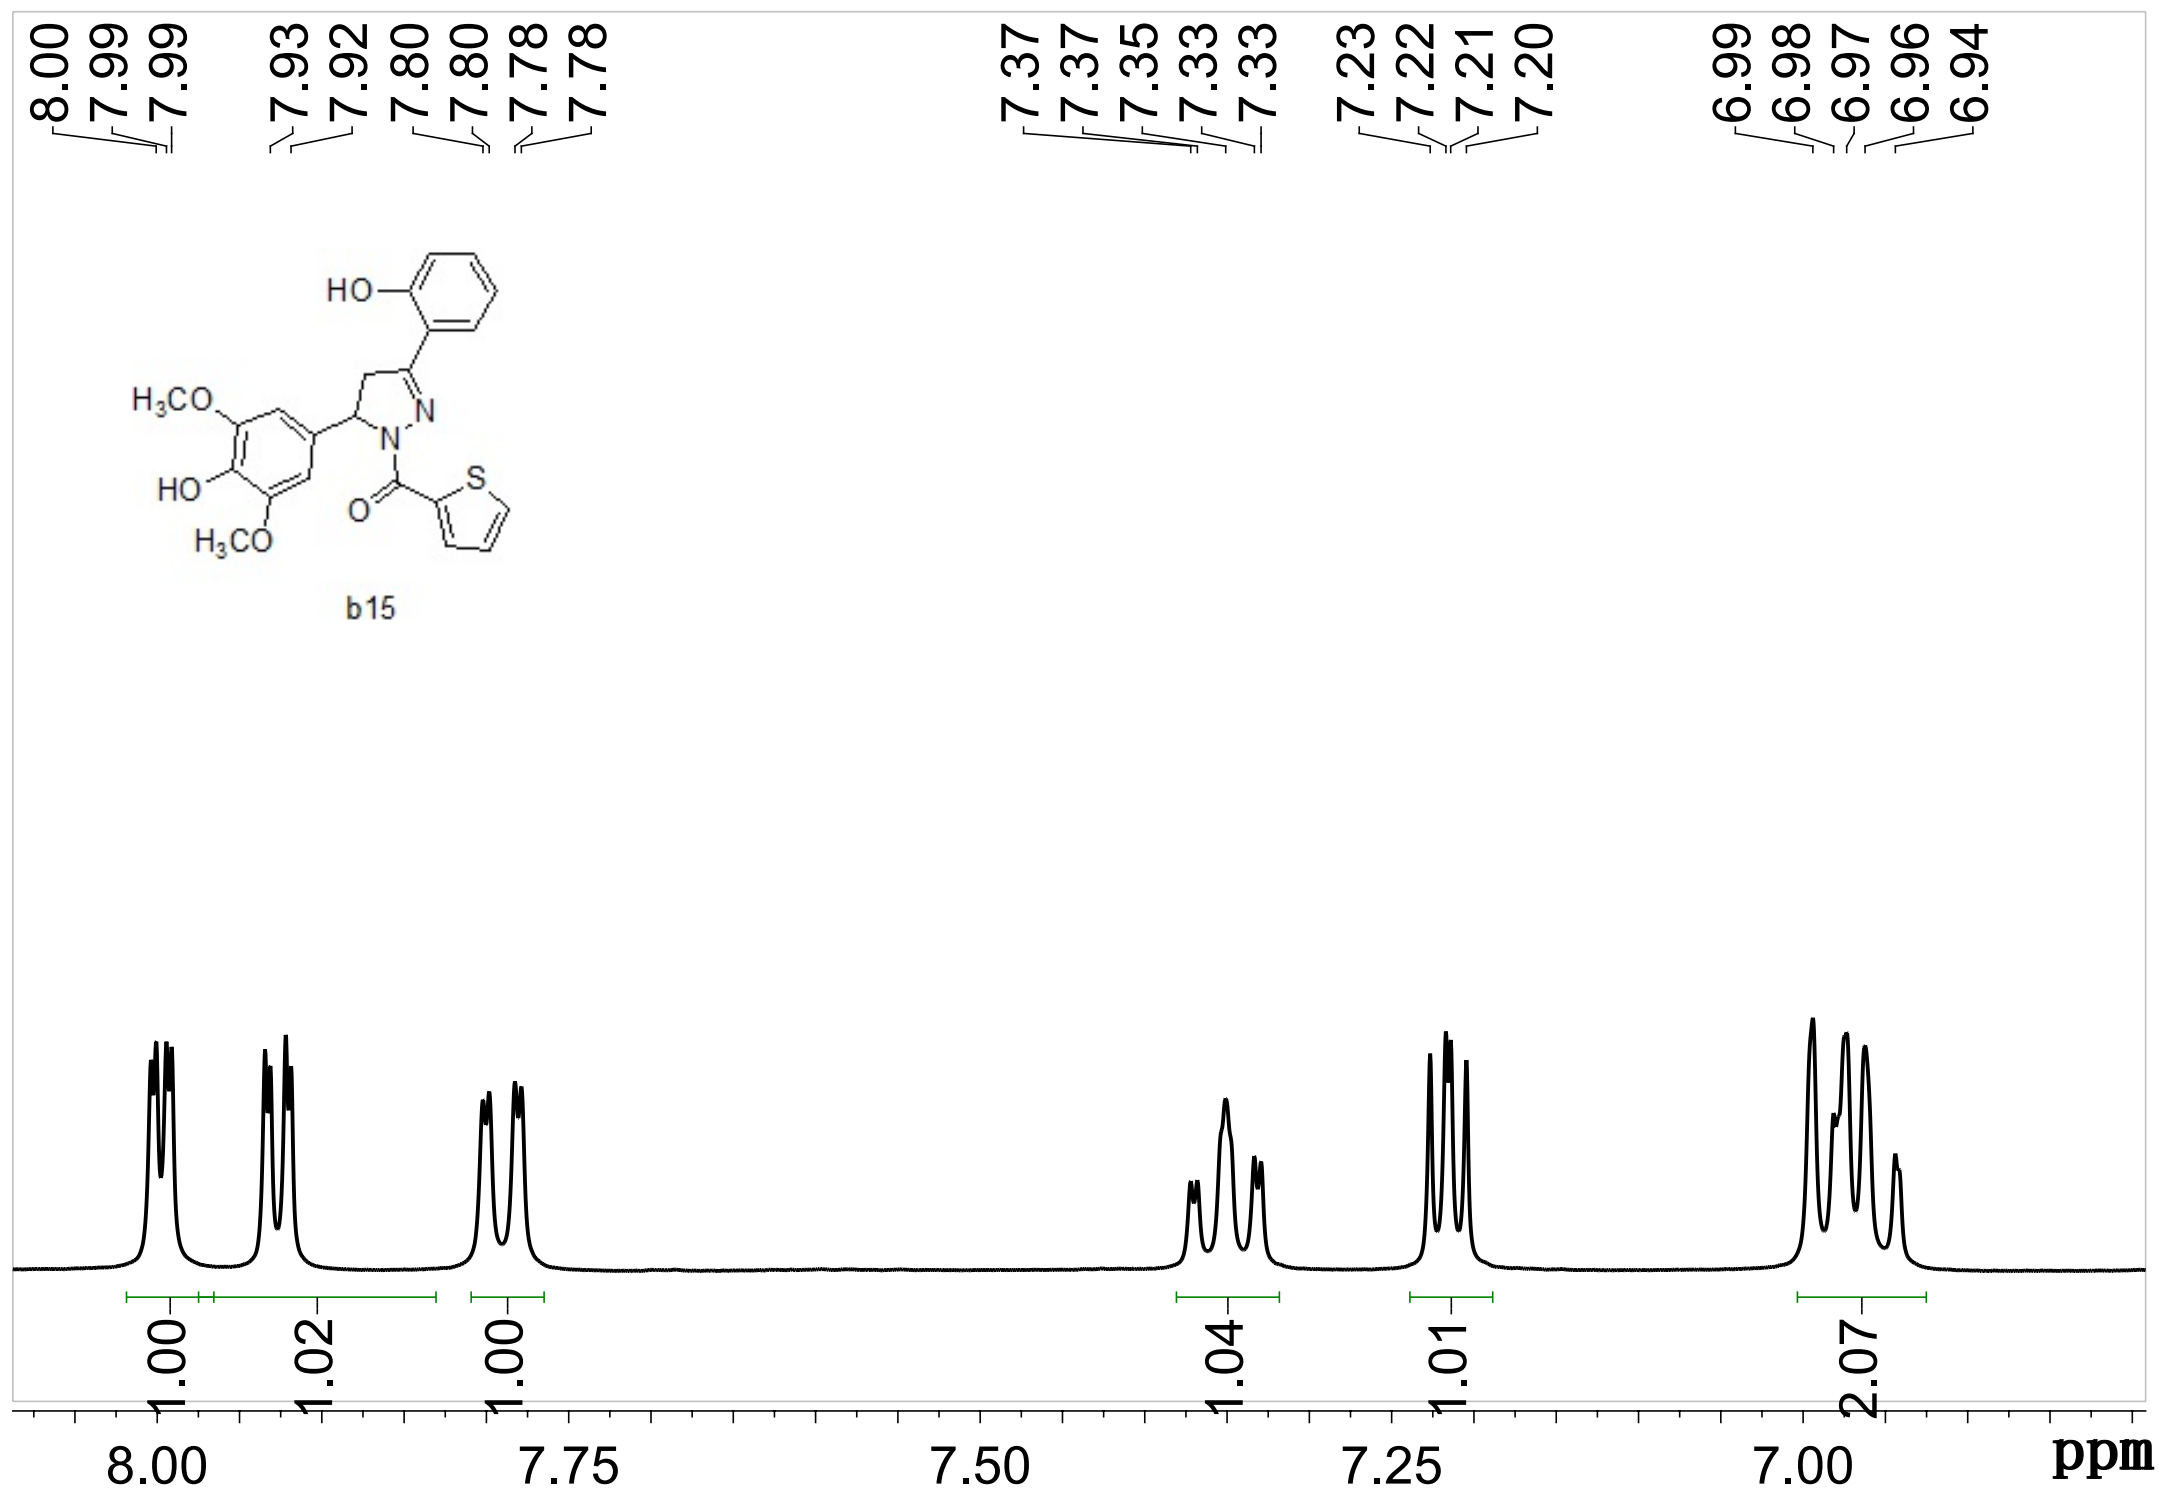

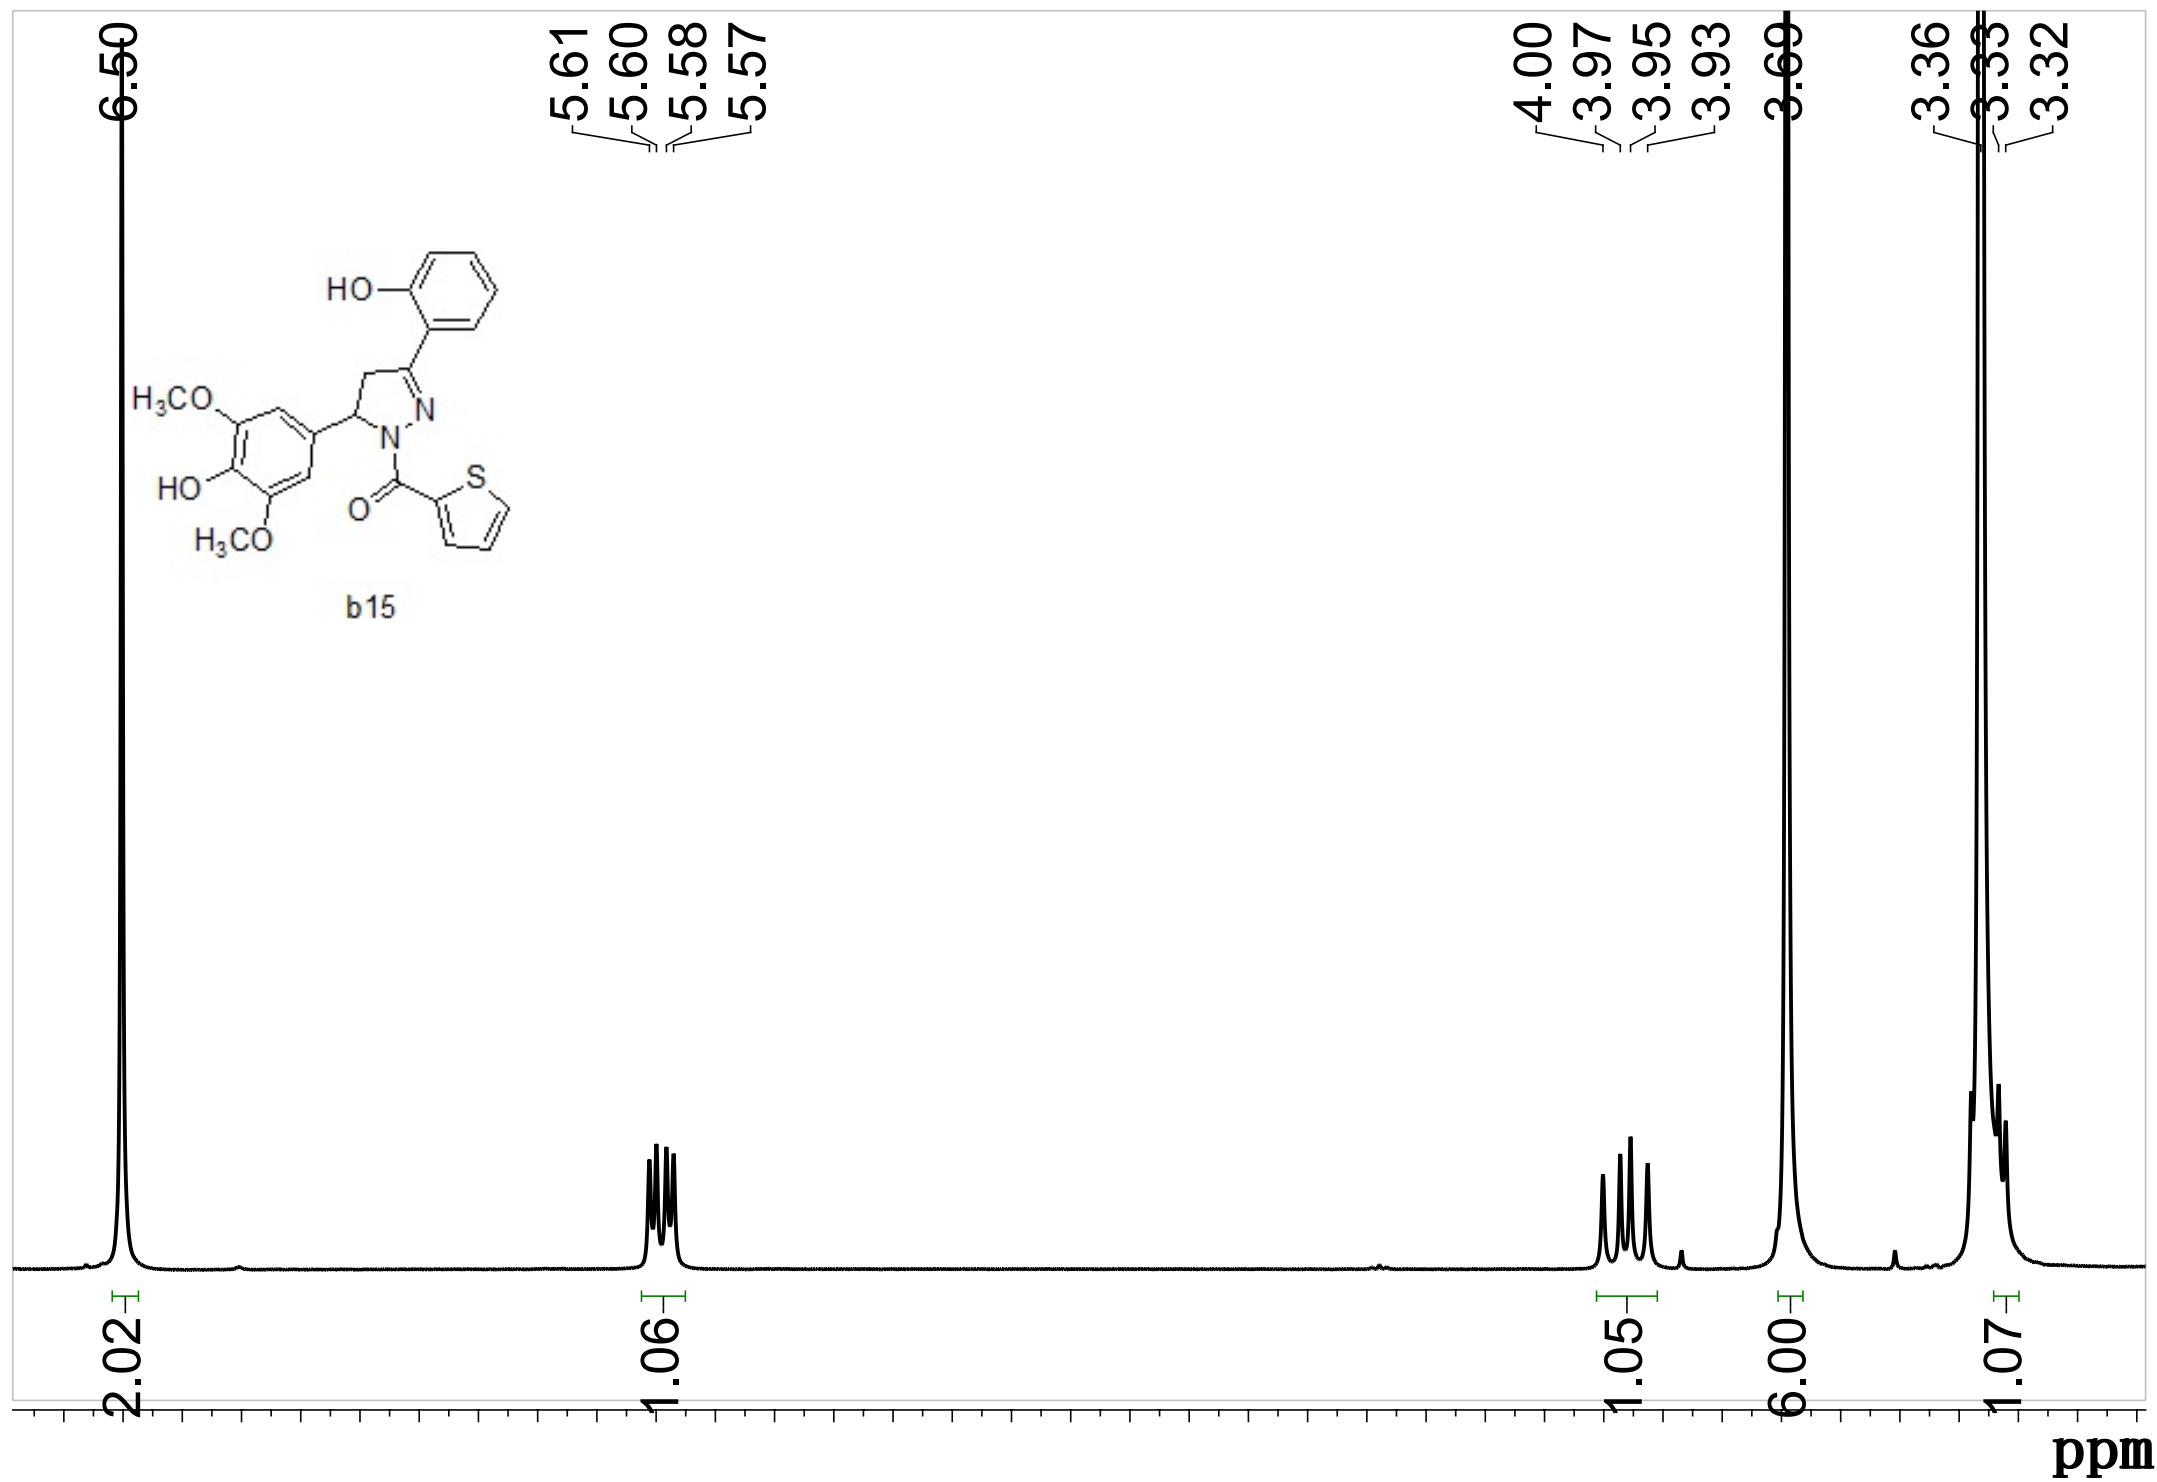

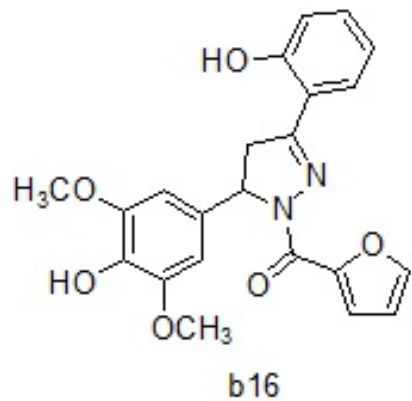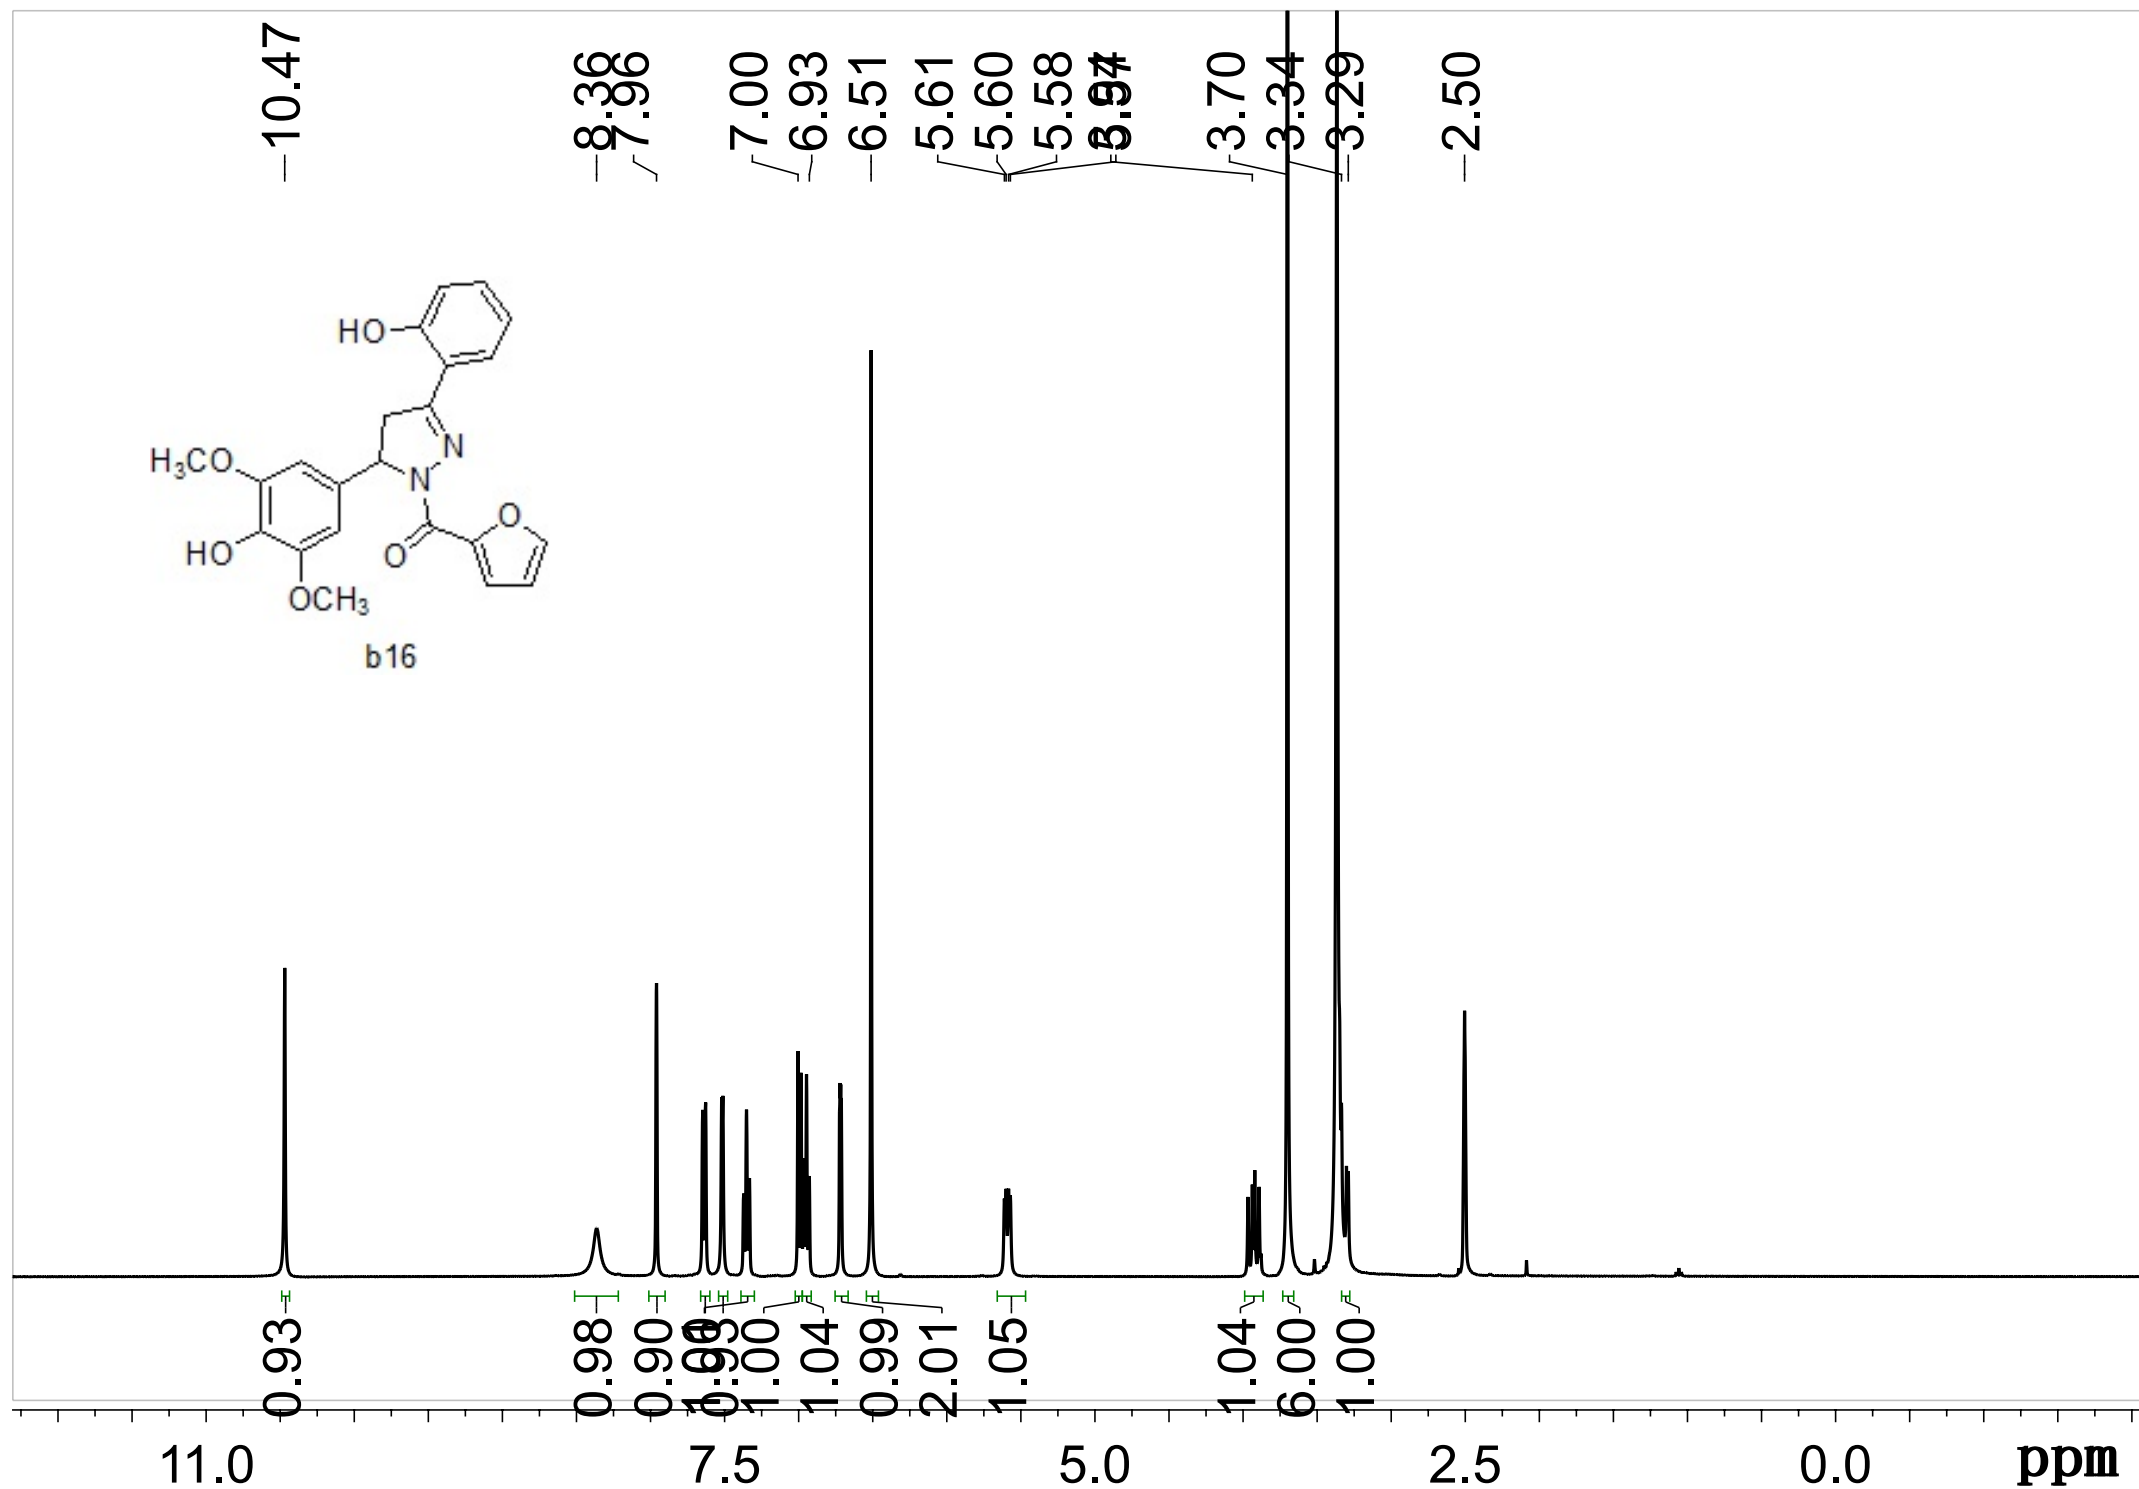

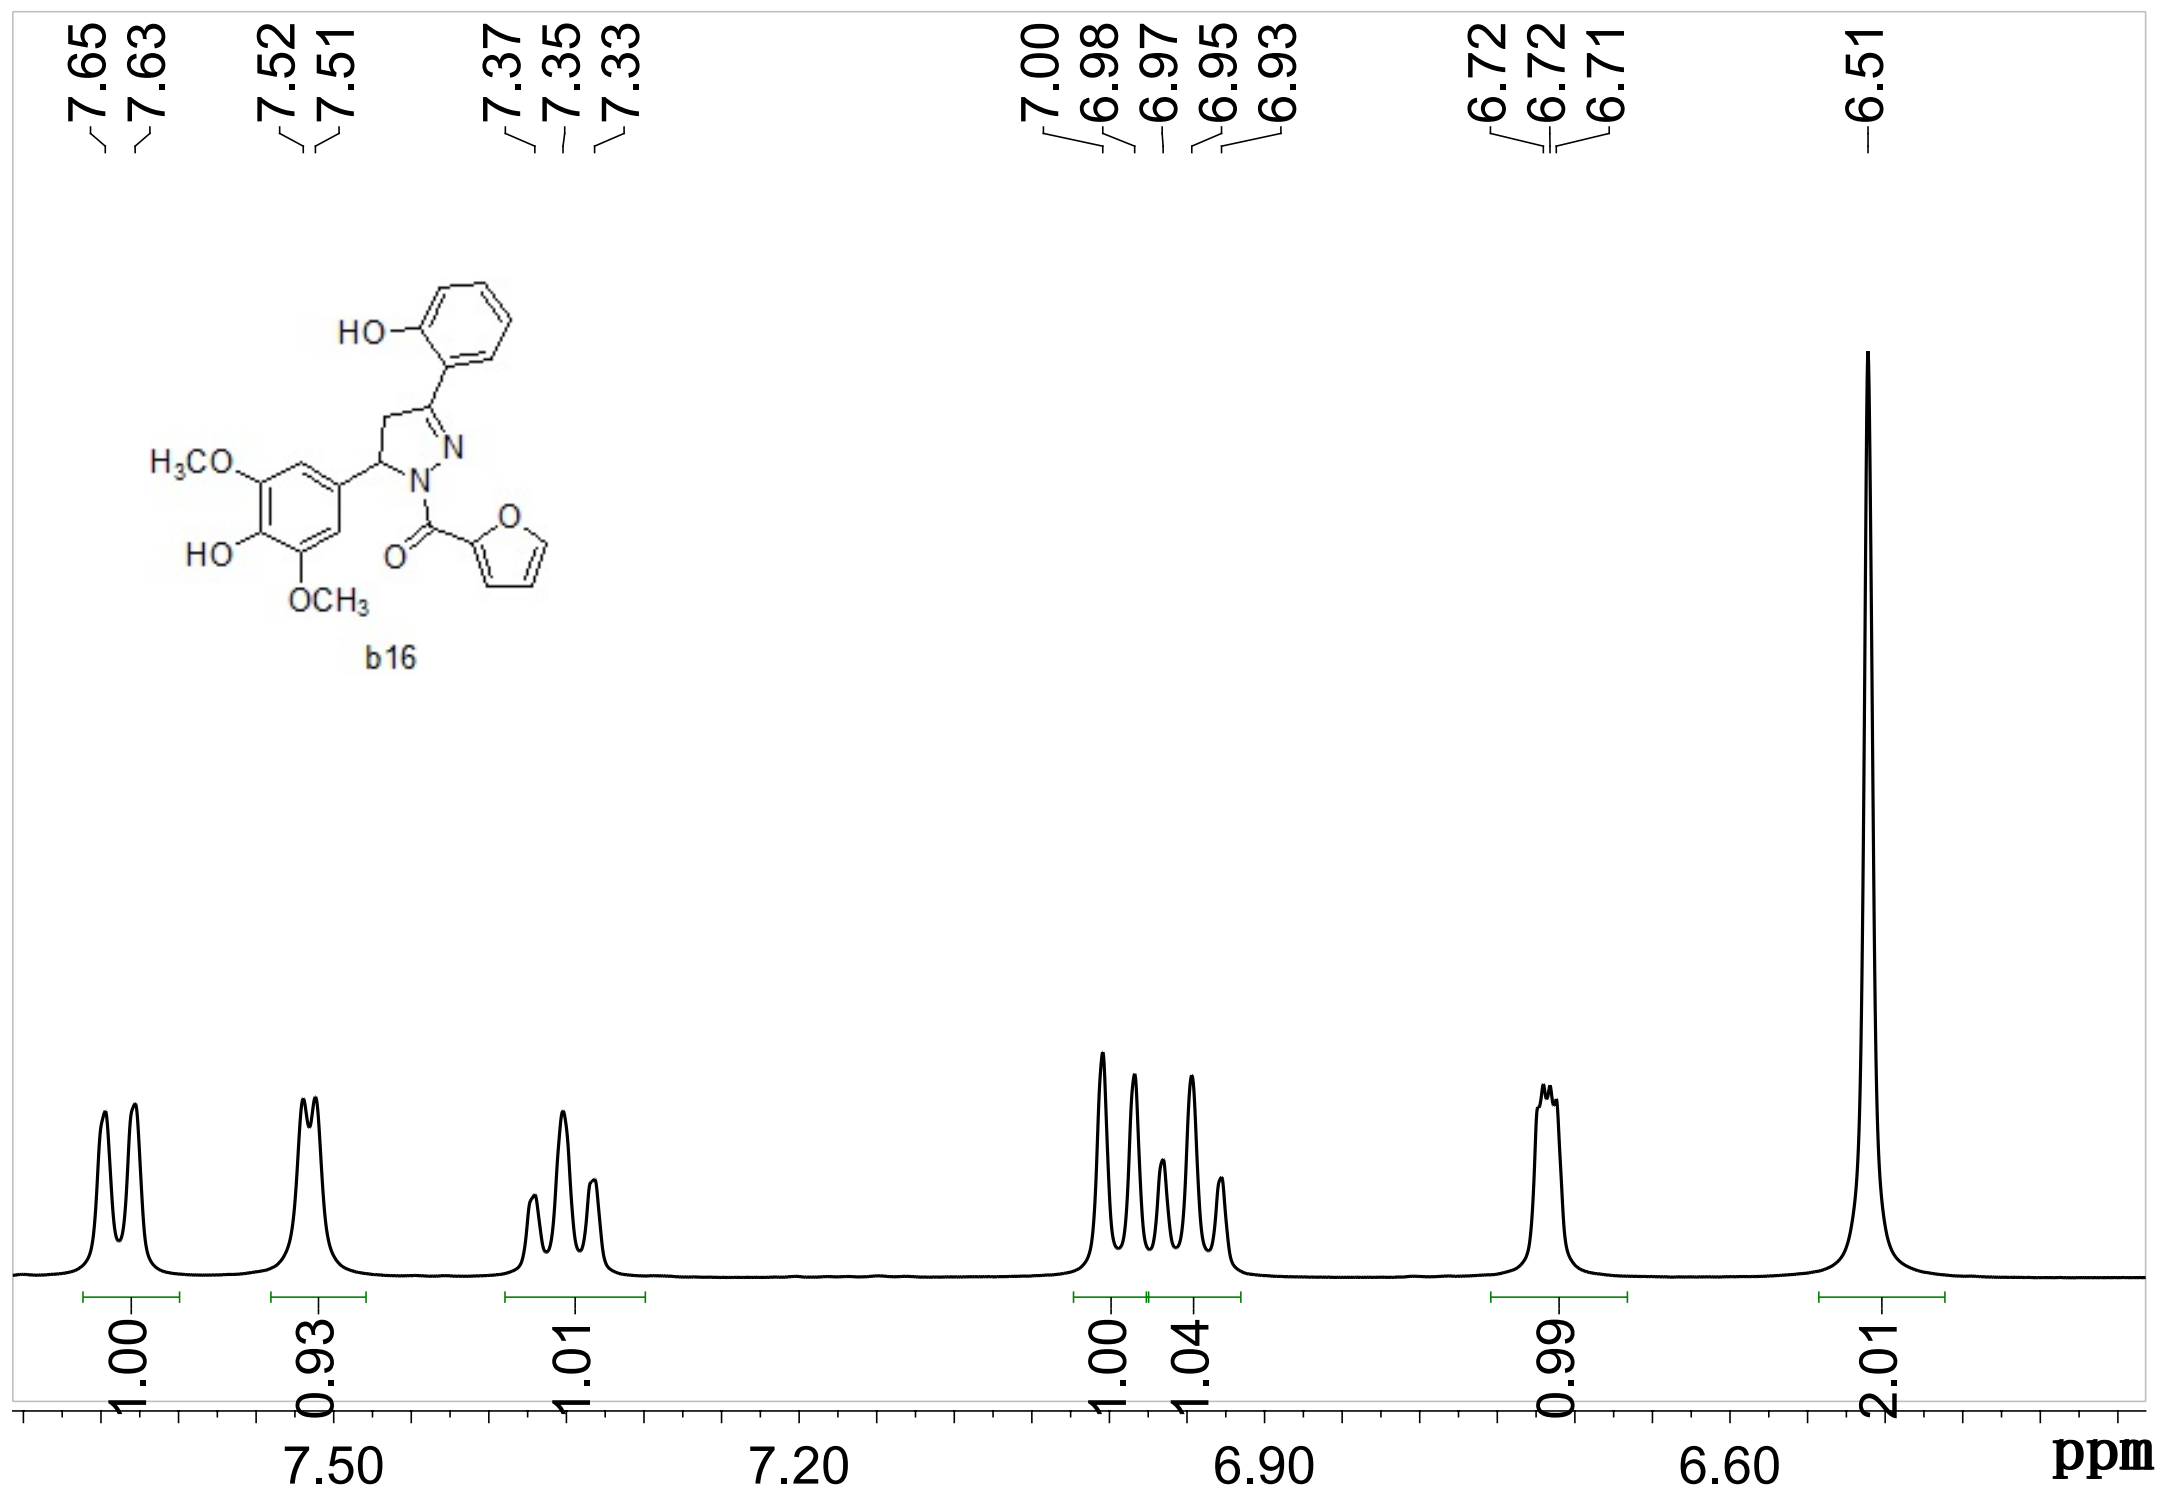



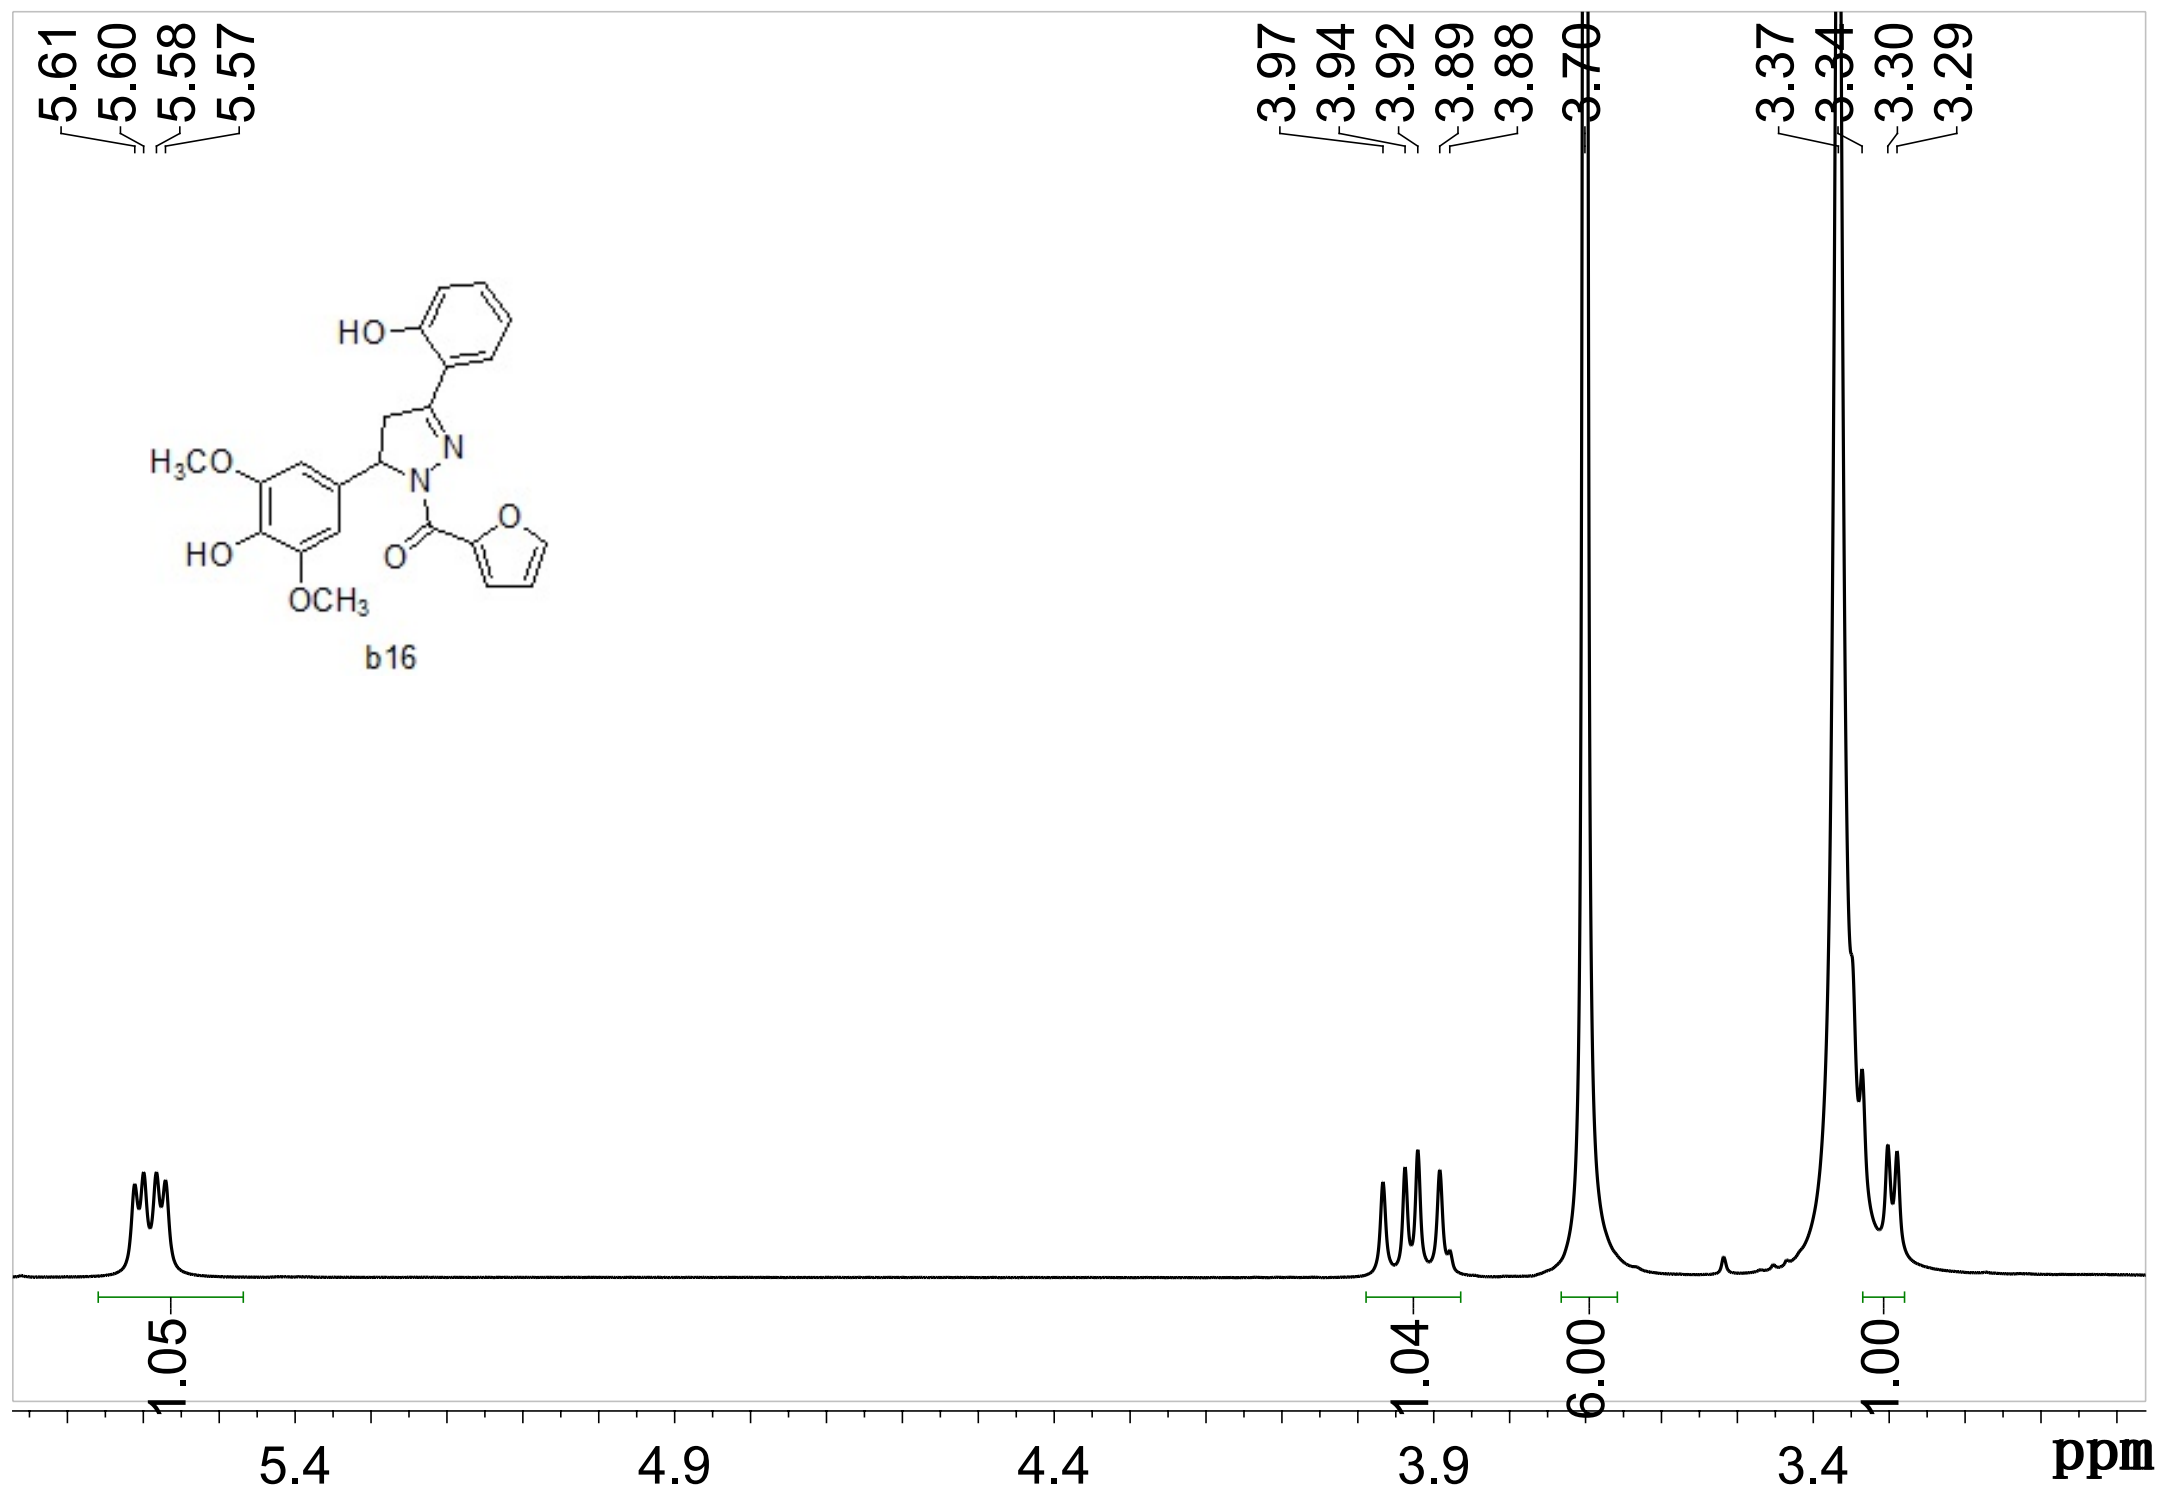

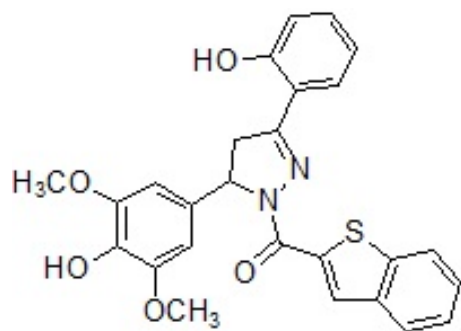

**b17**

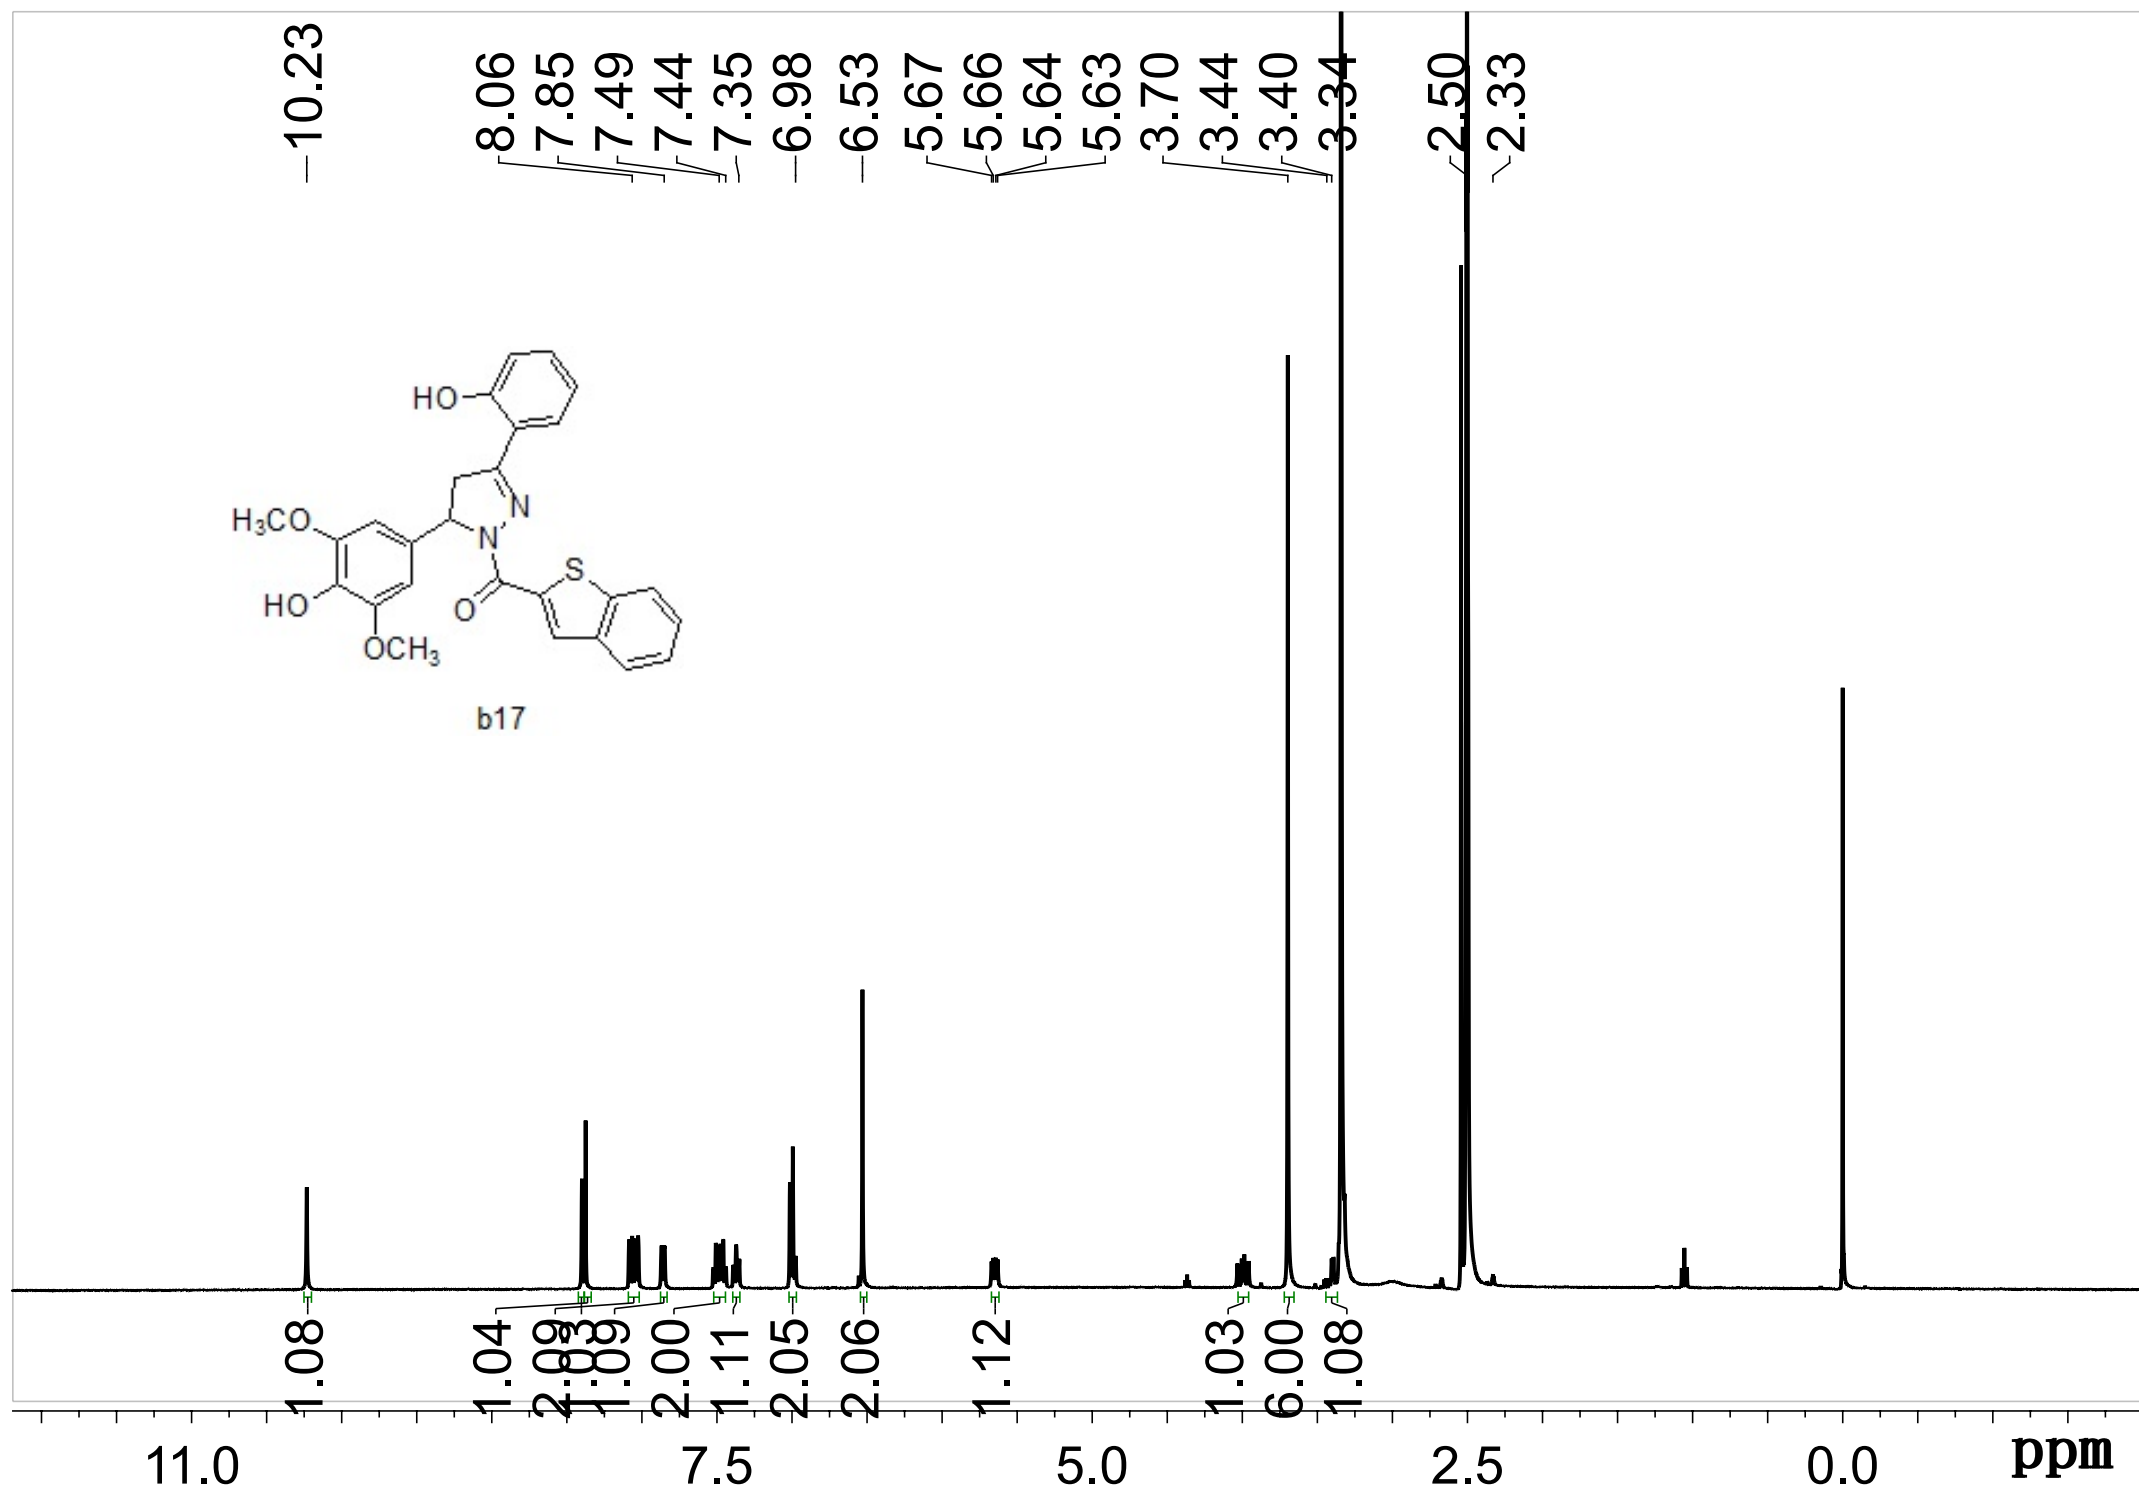

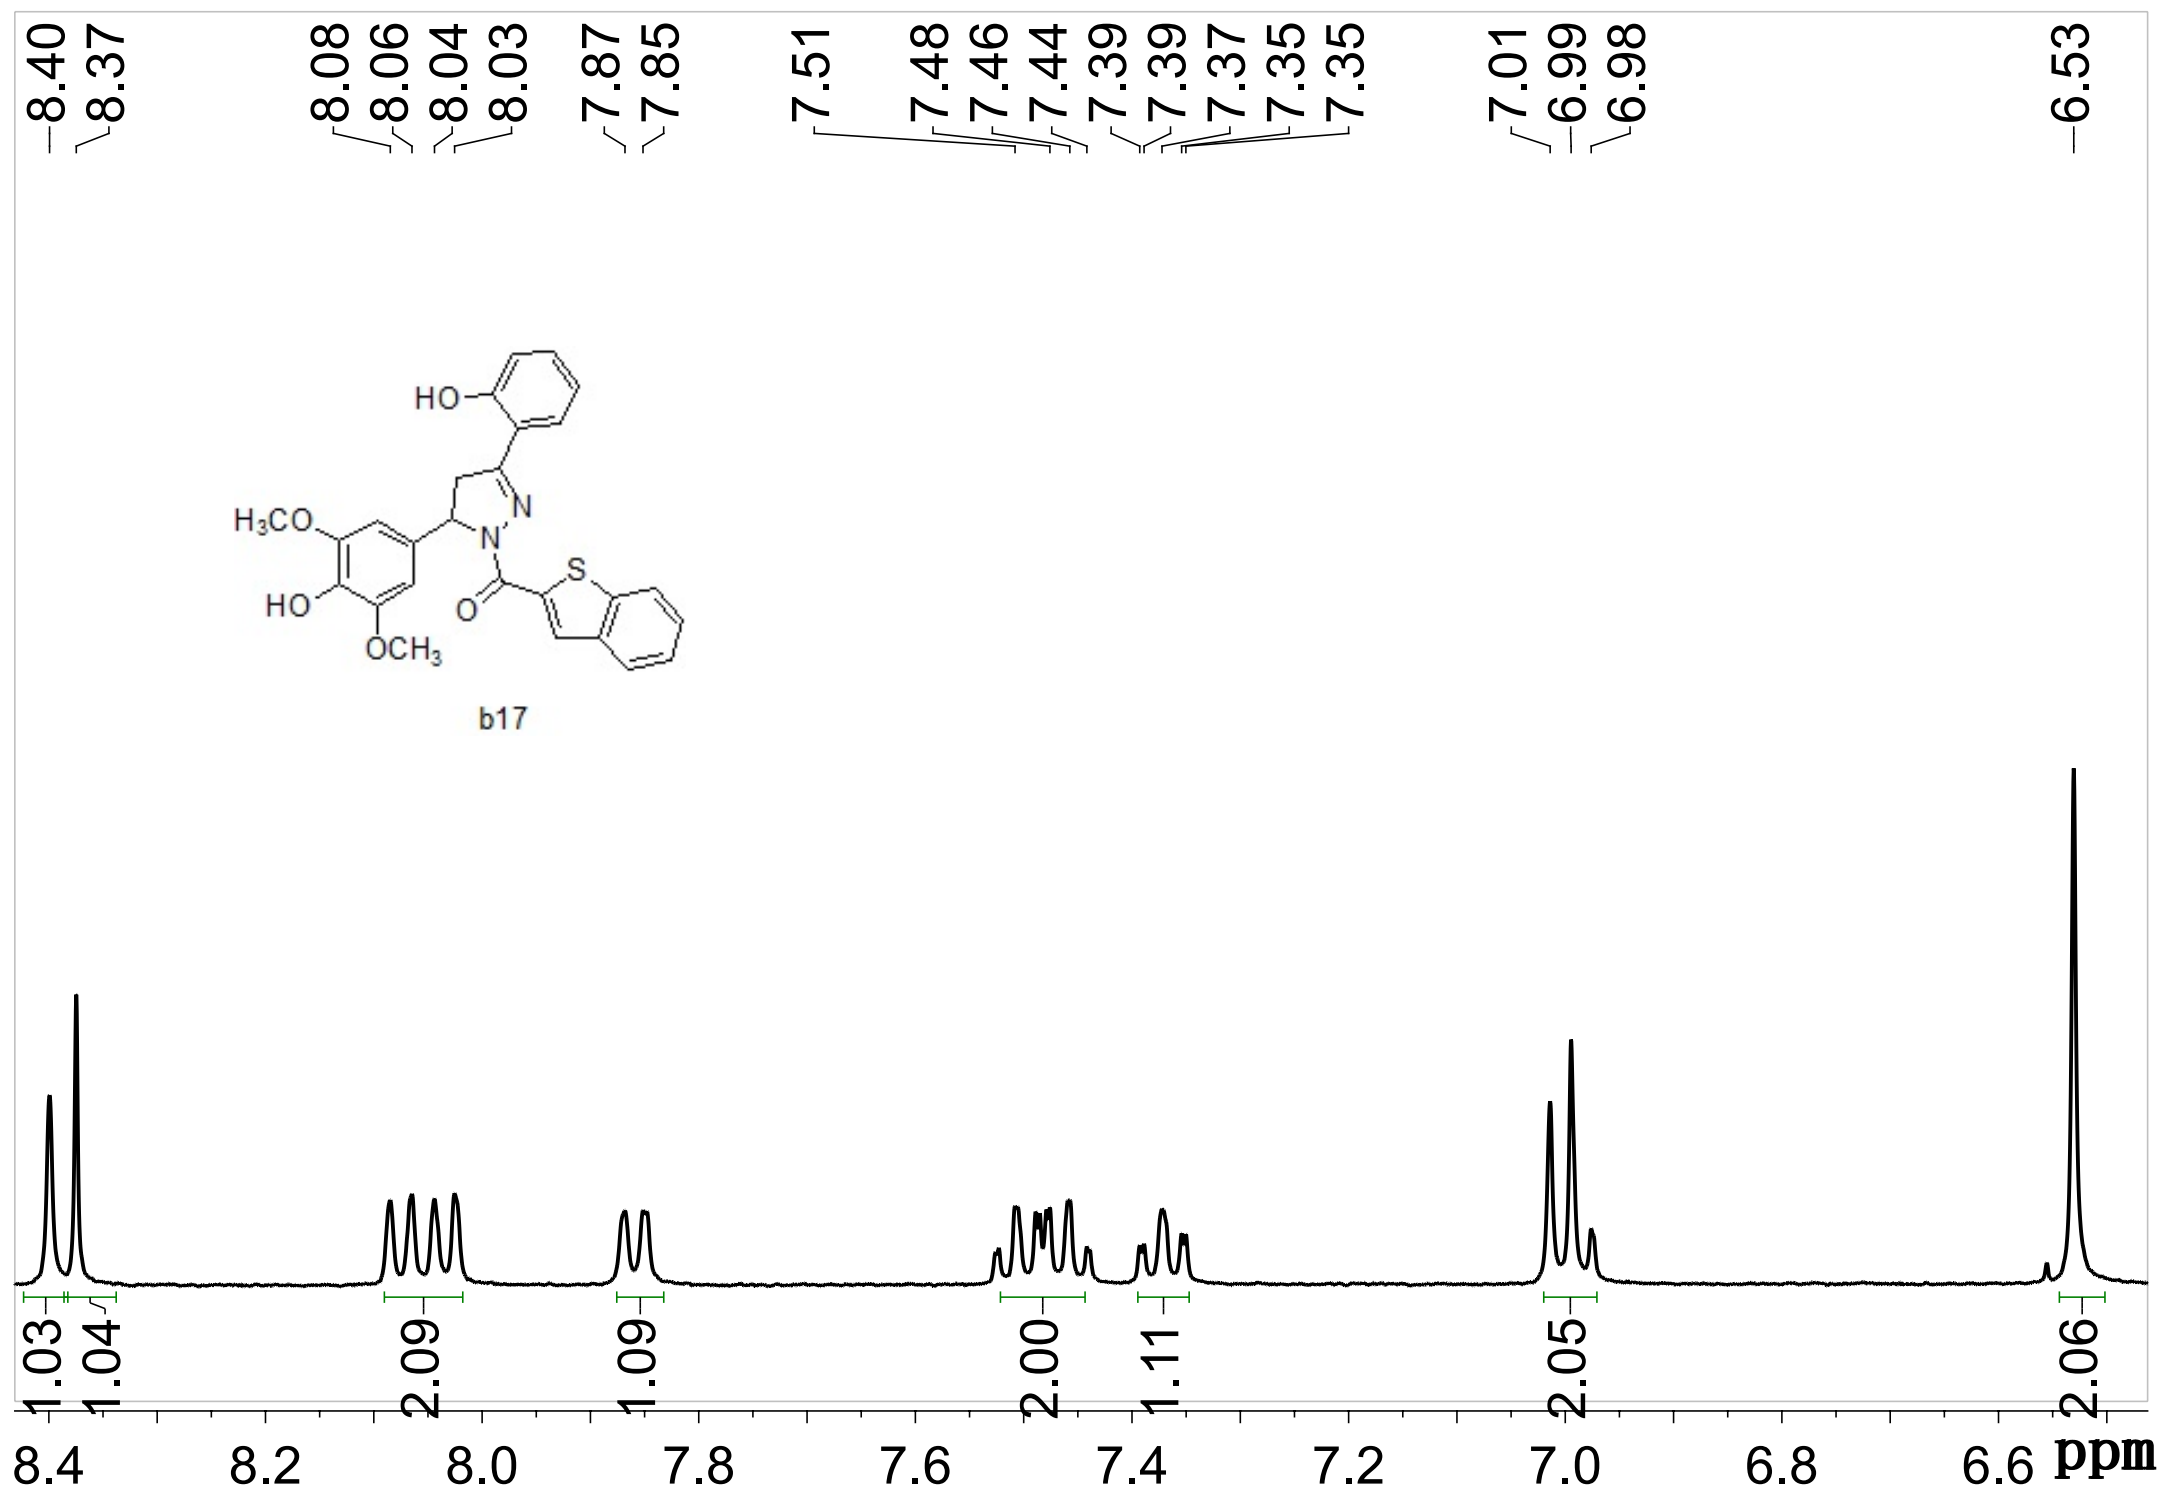

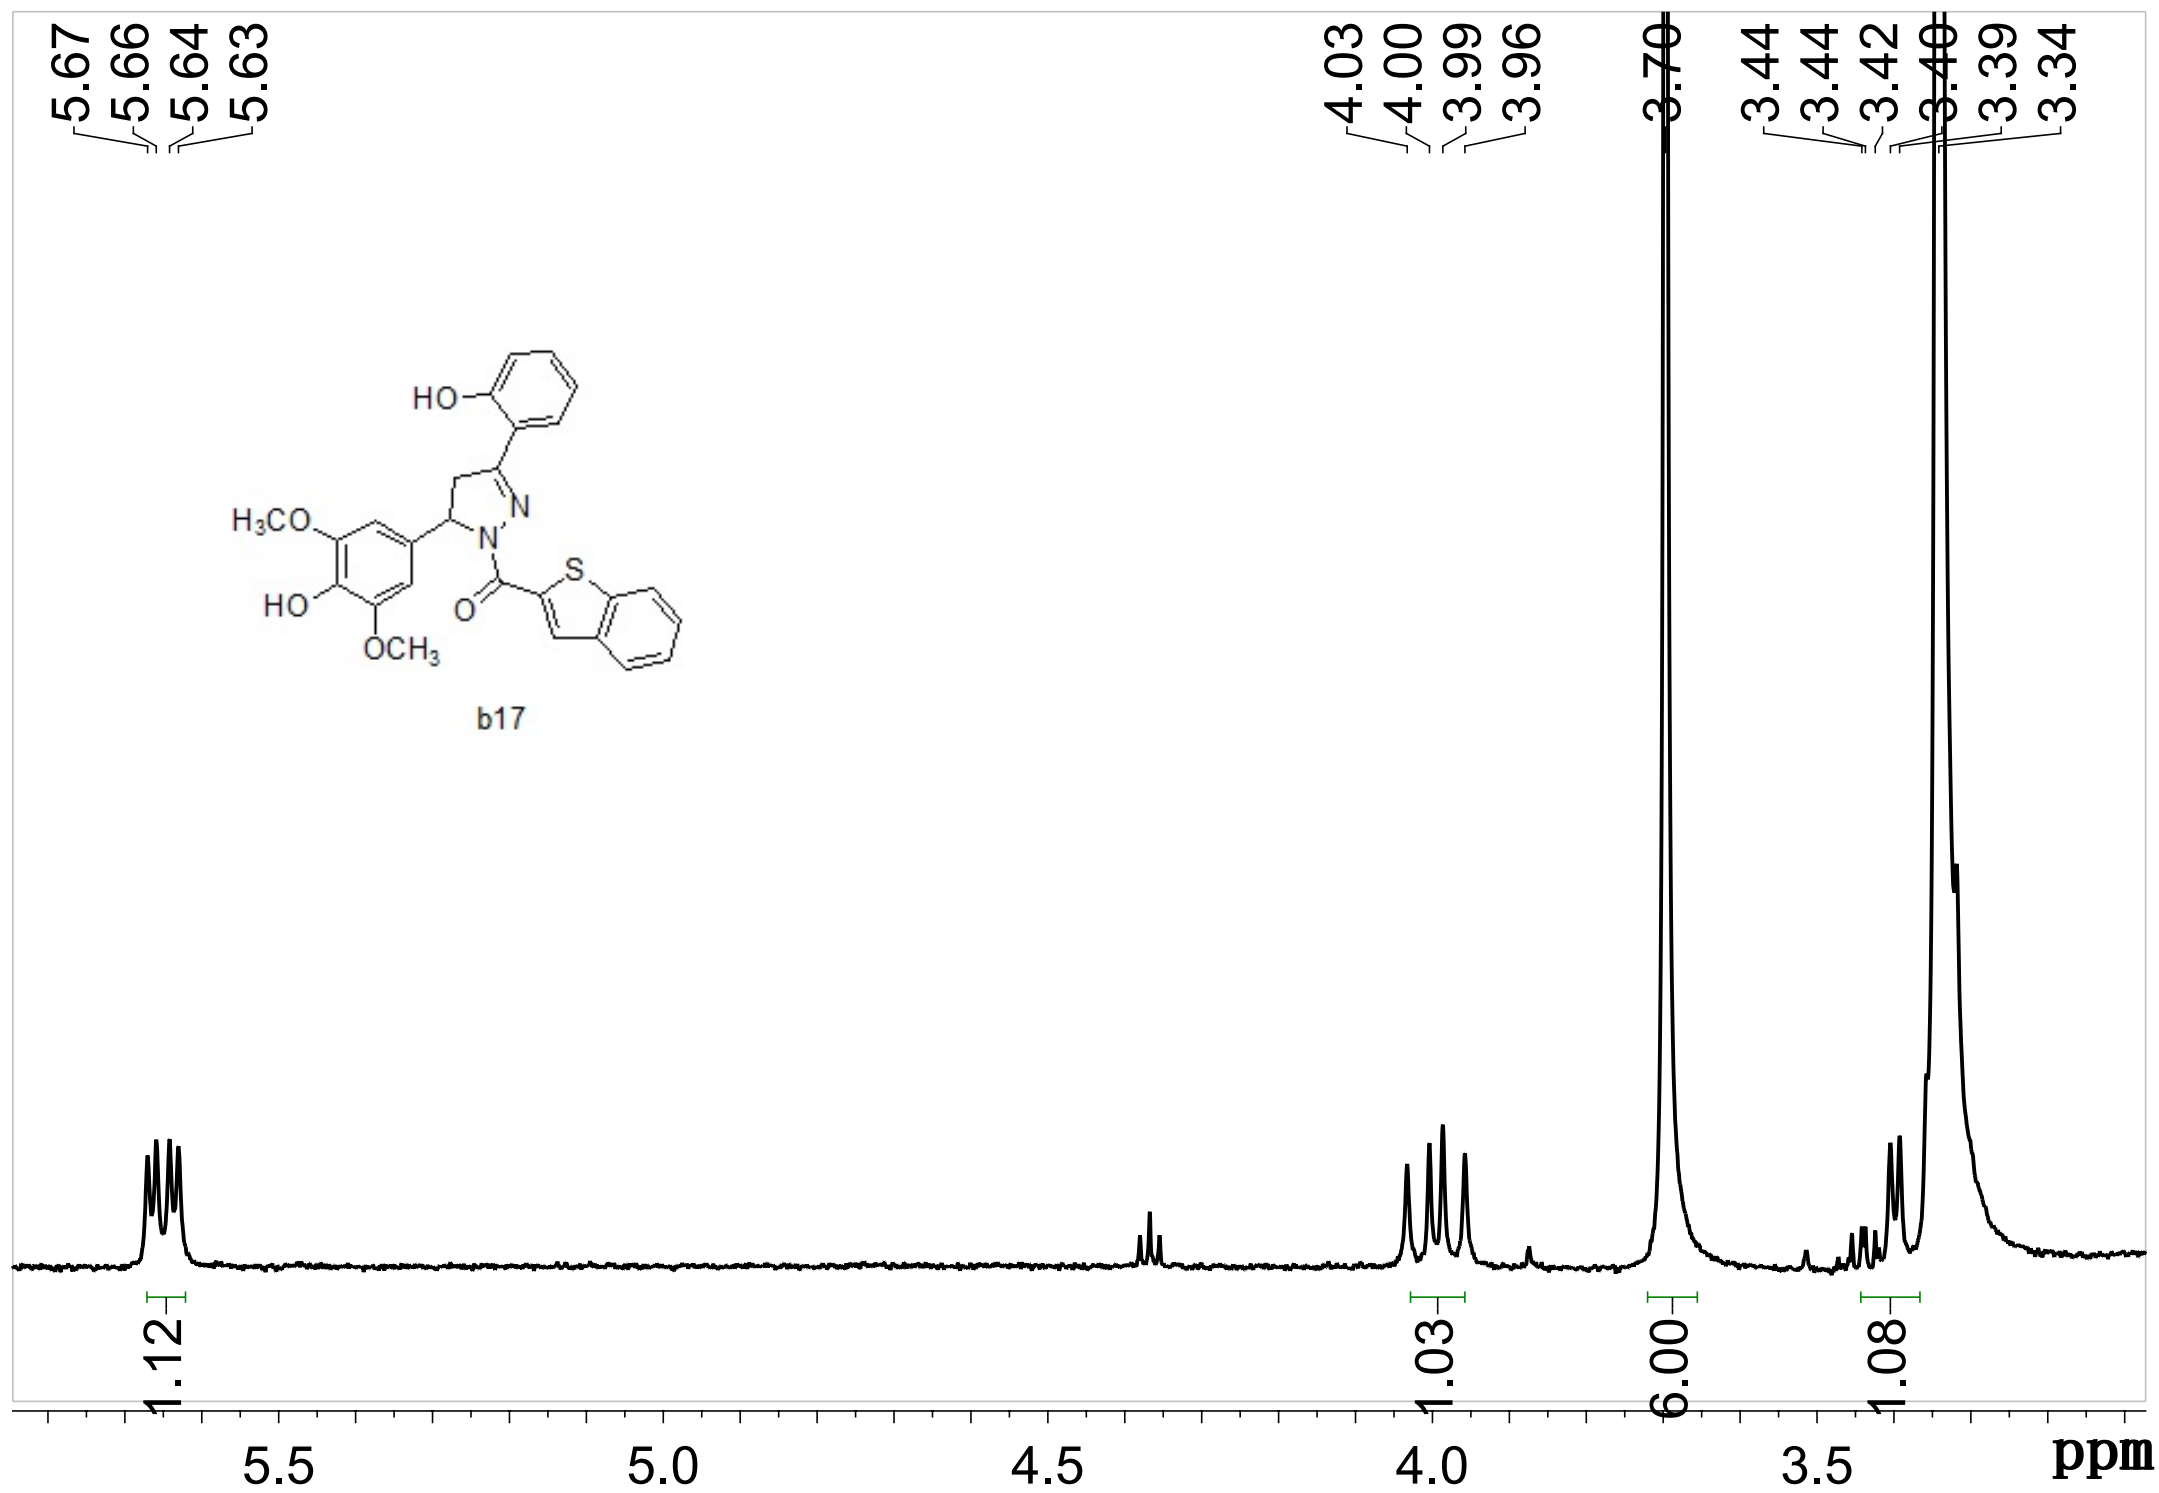

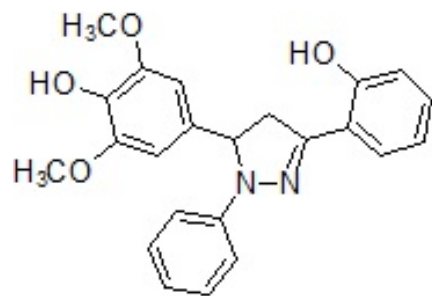

b18

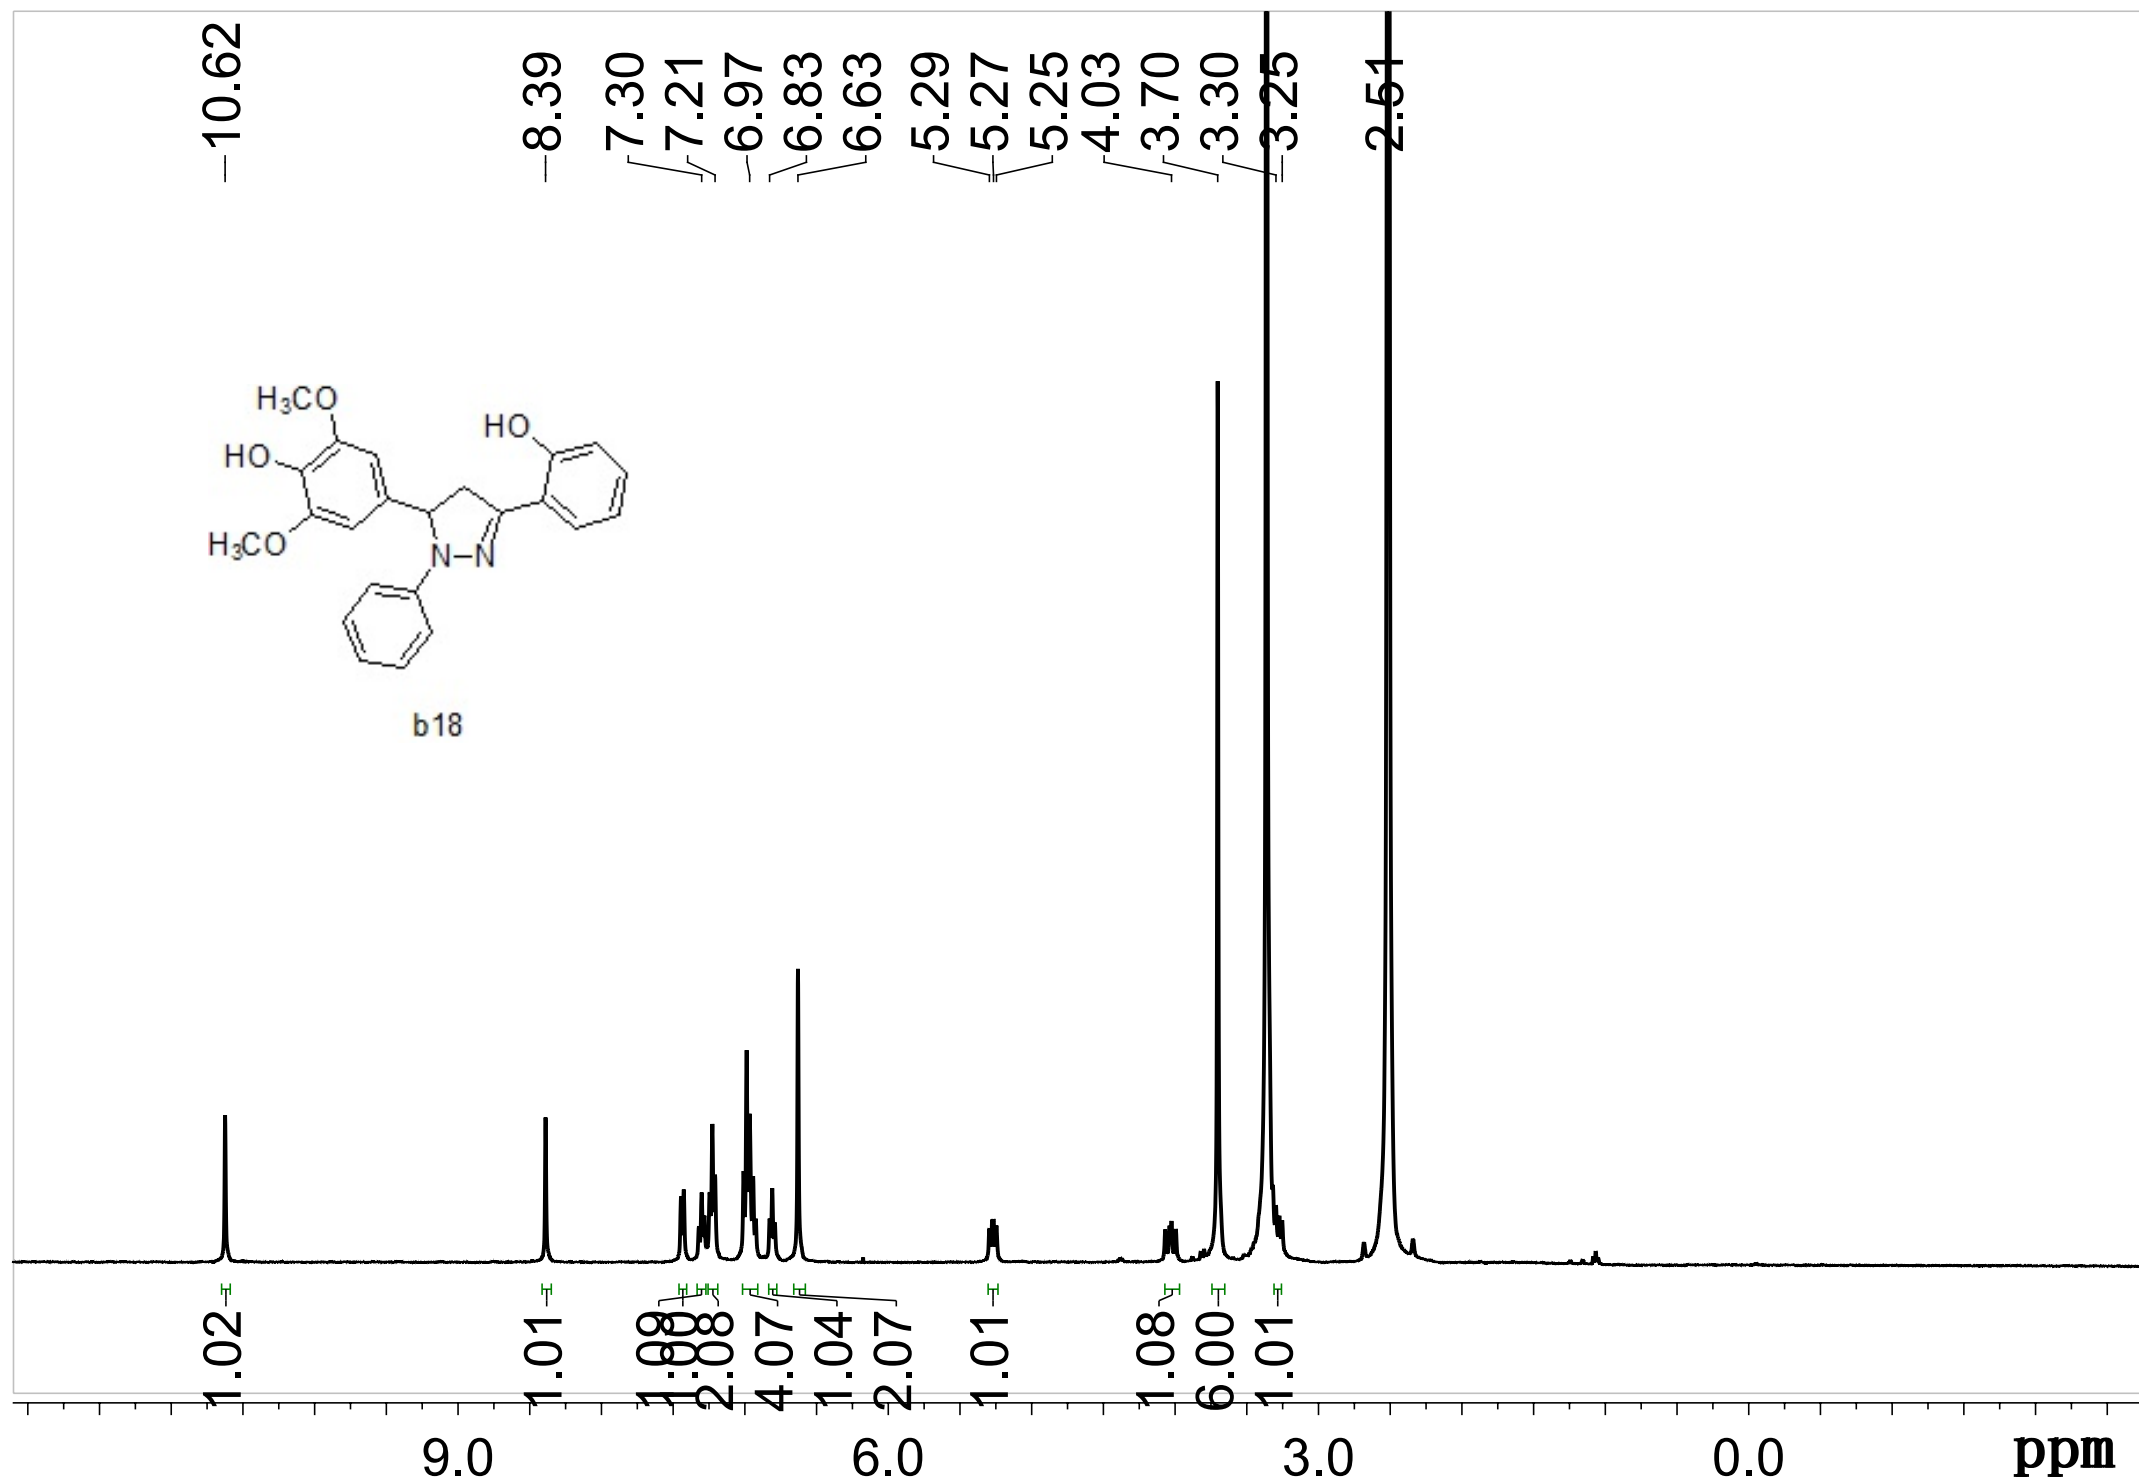



b18

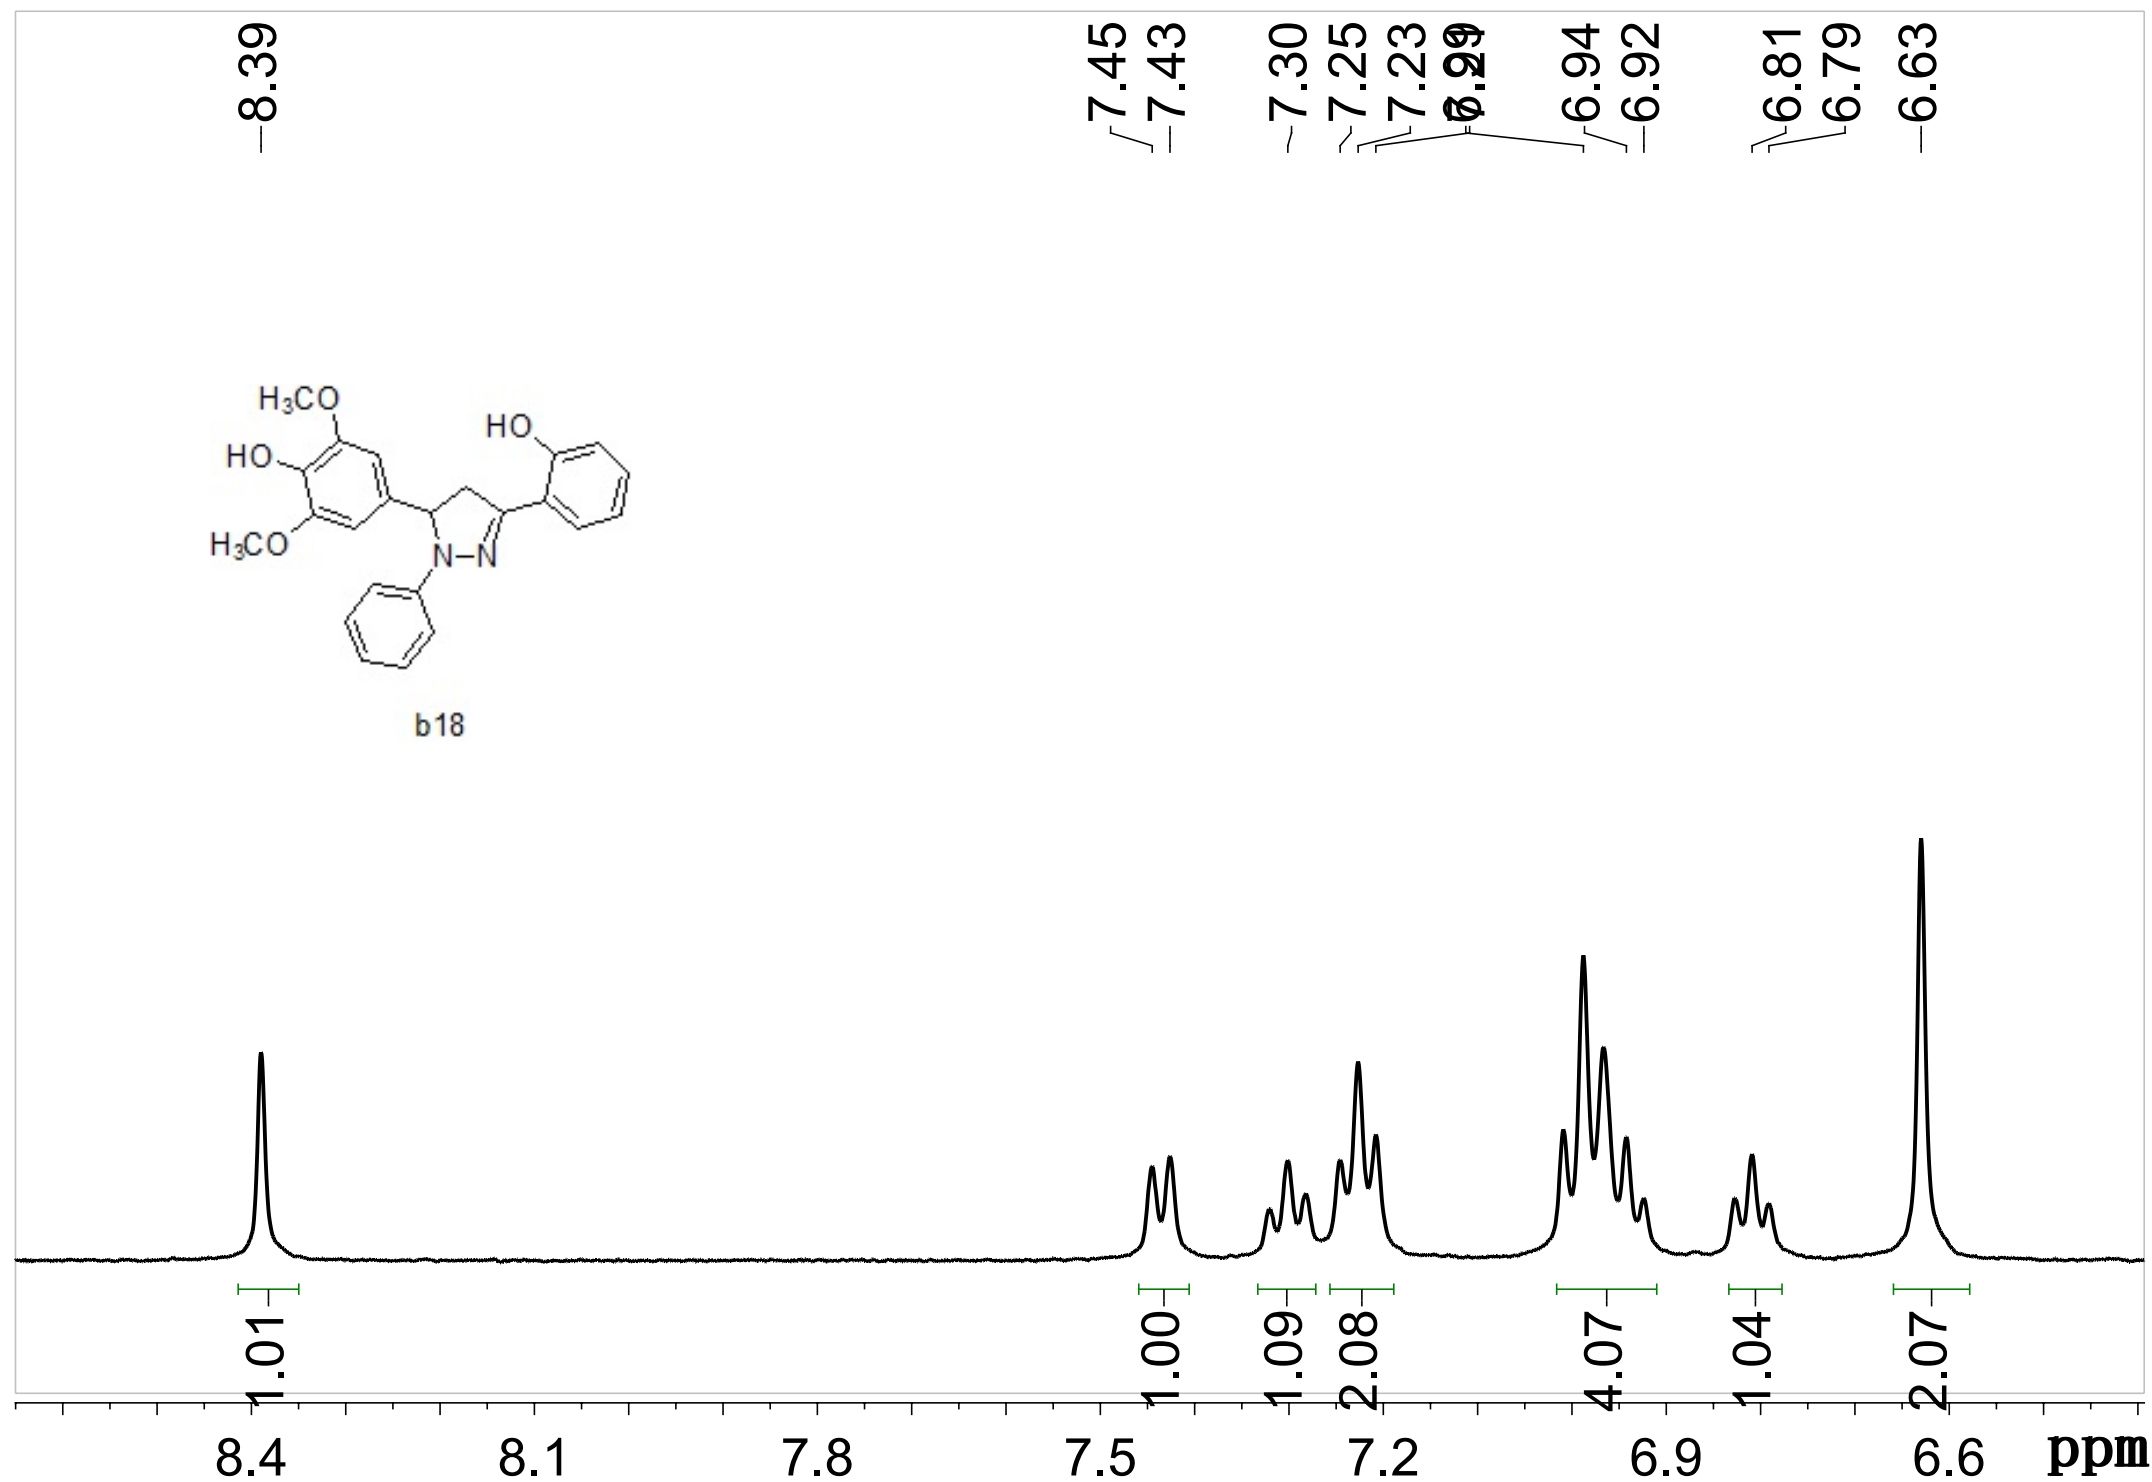

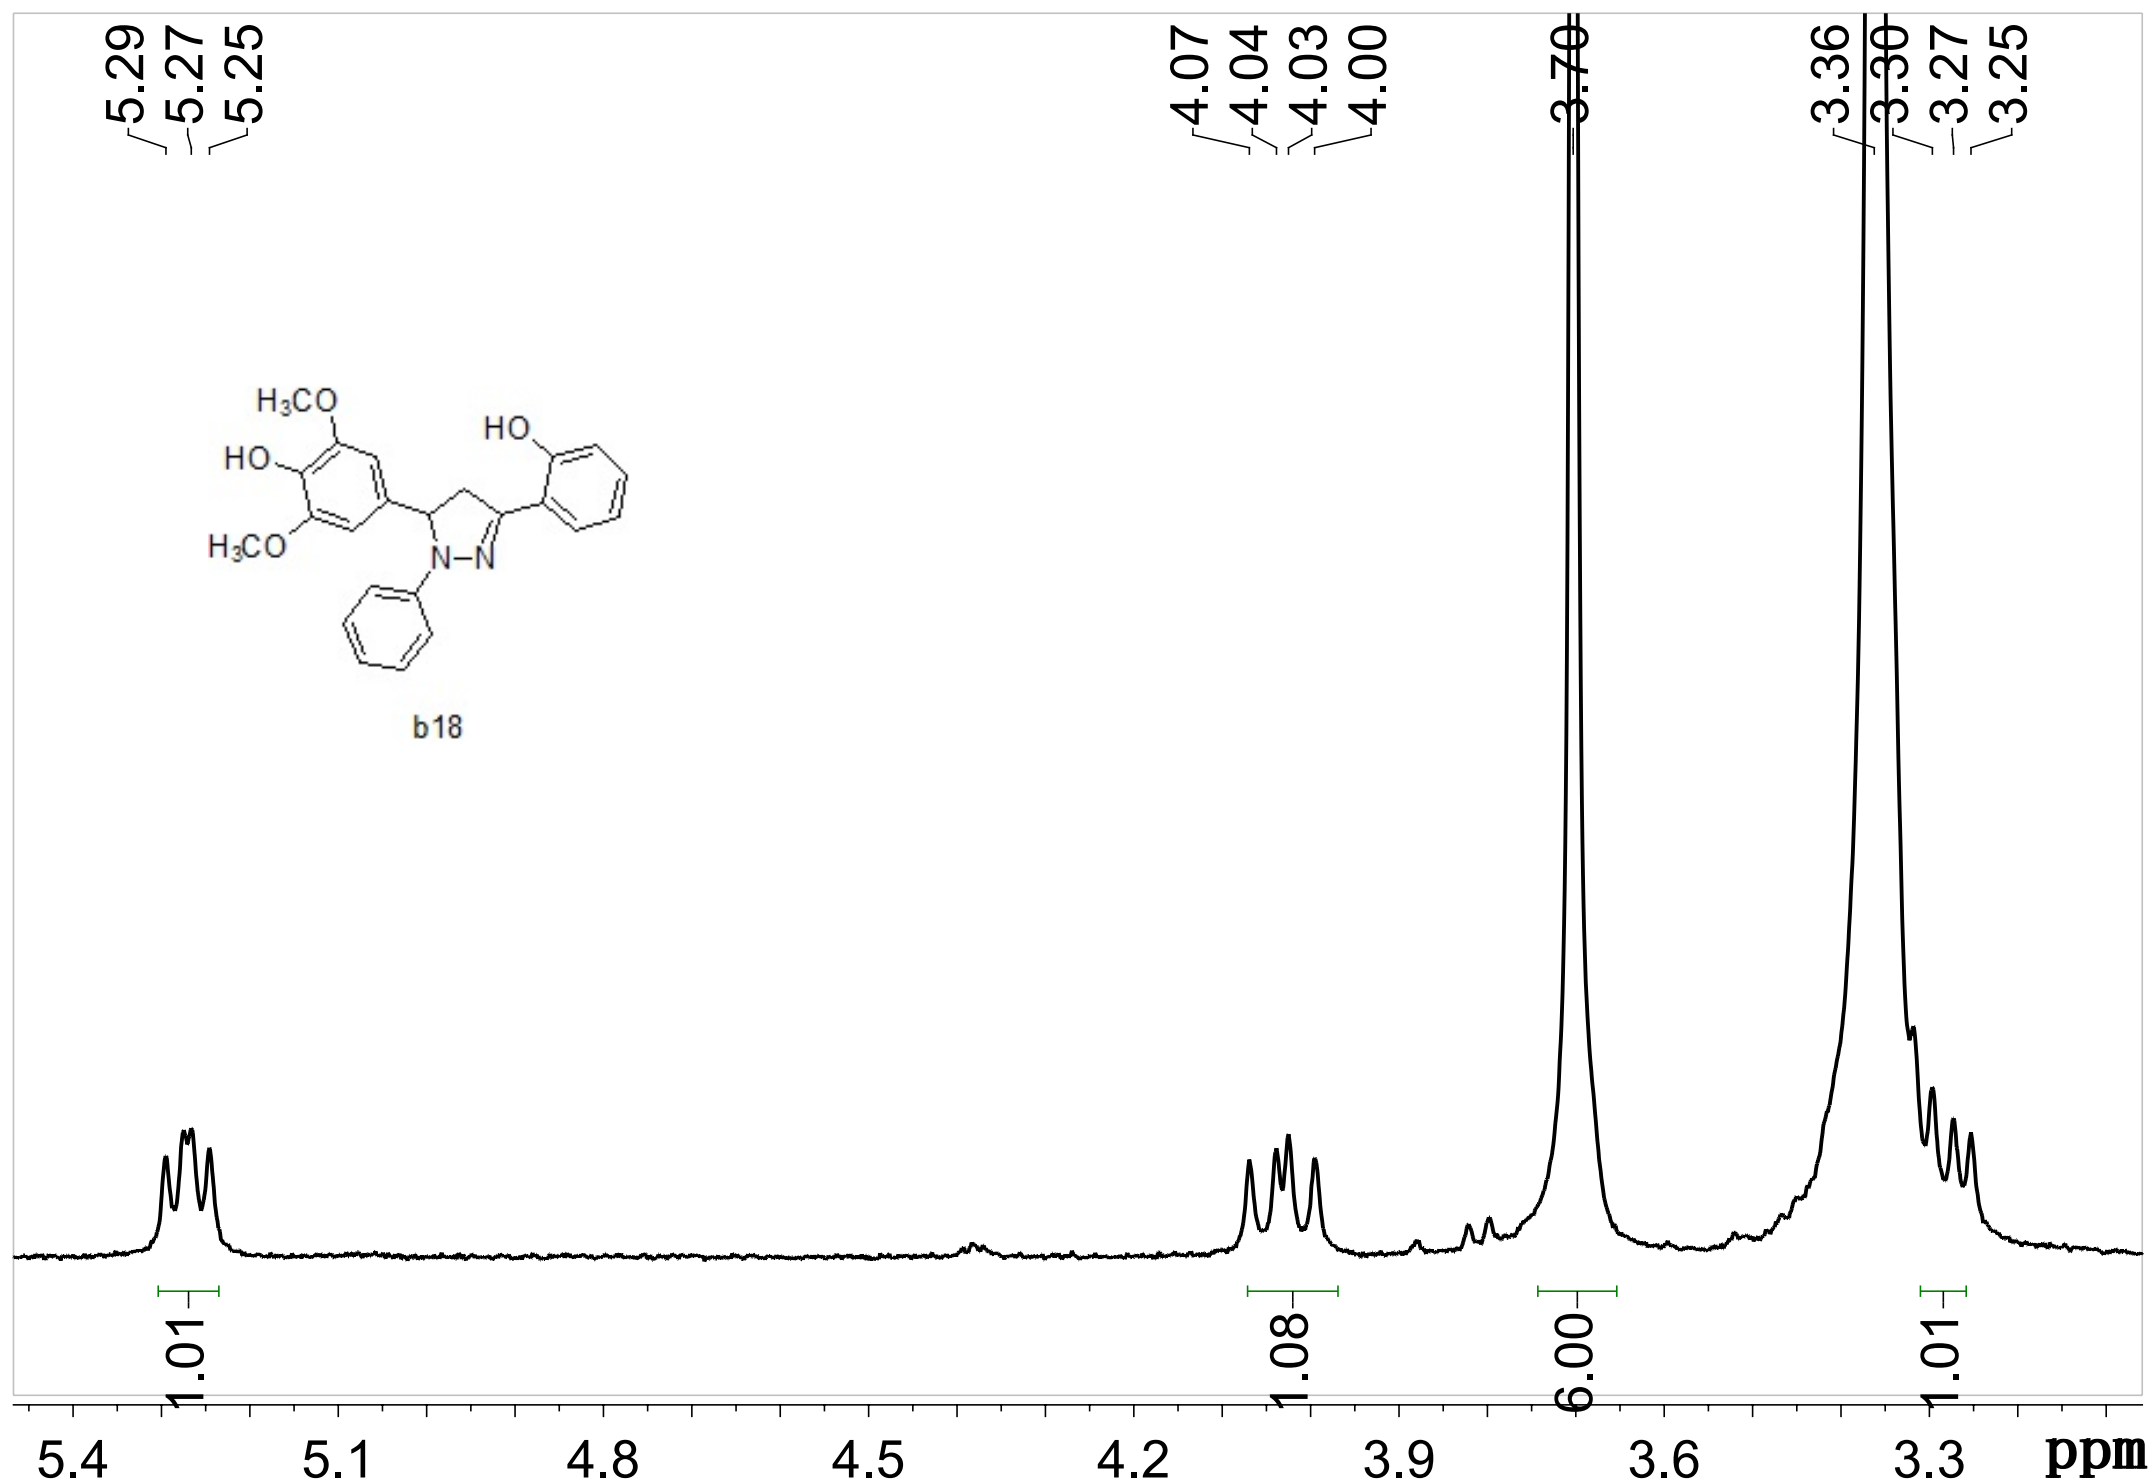

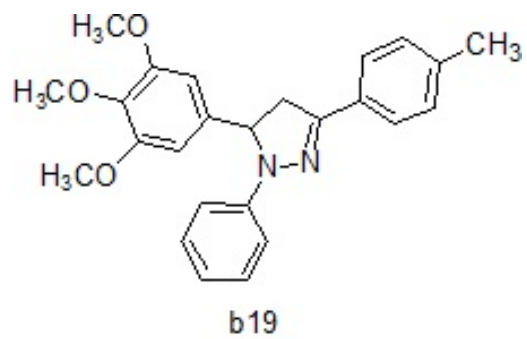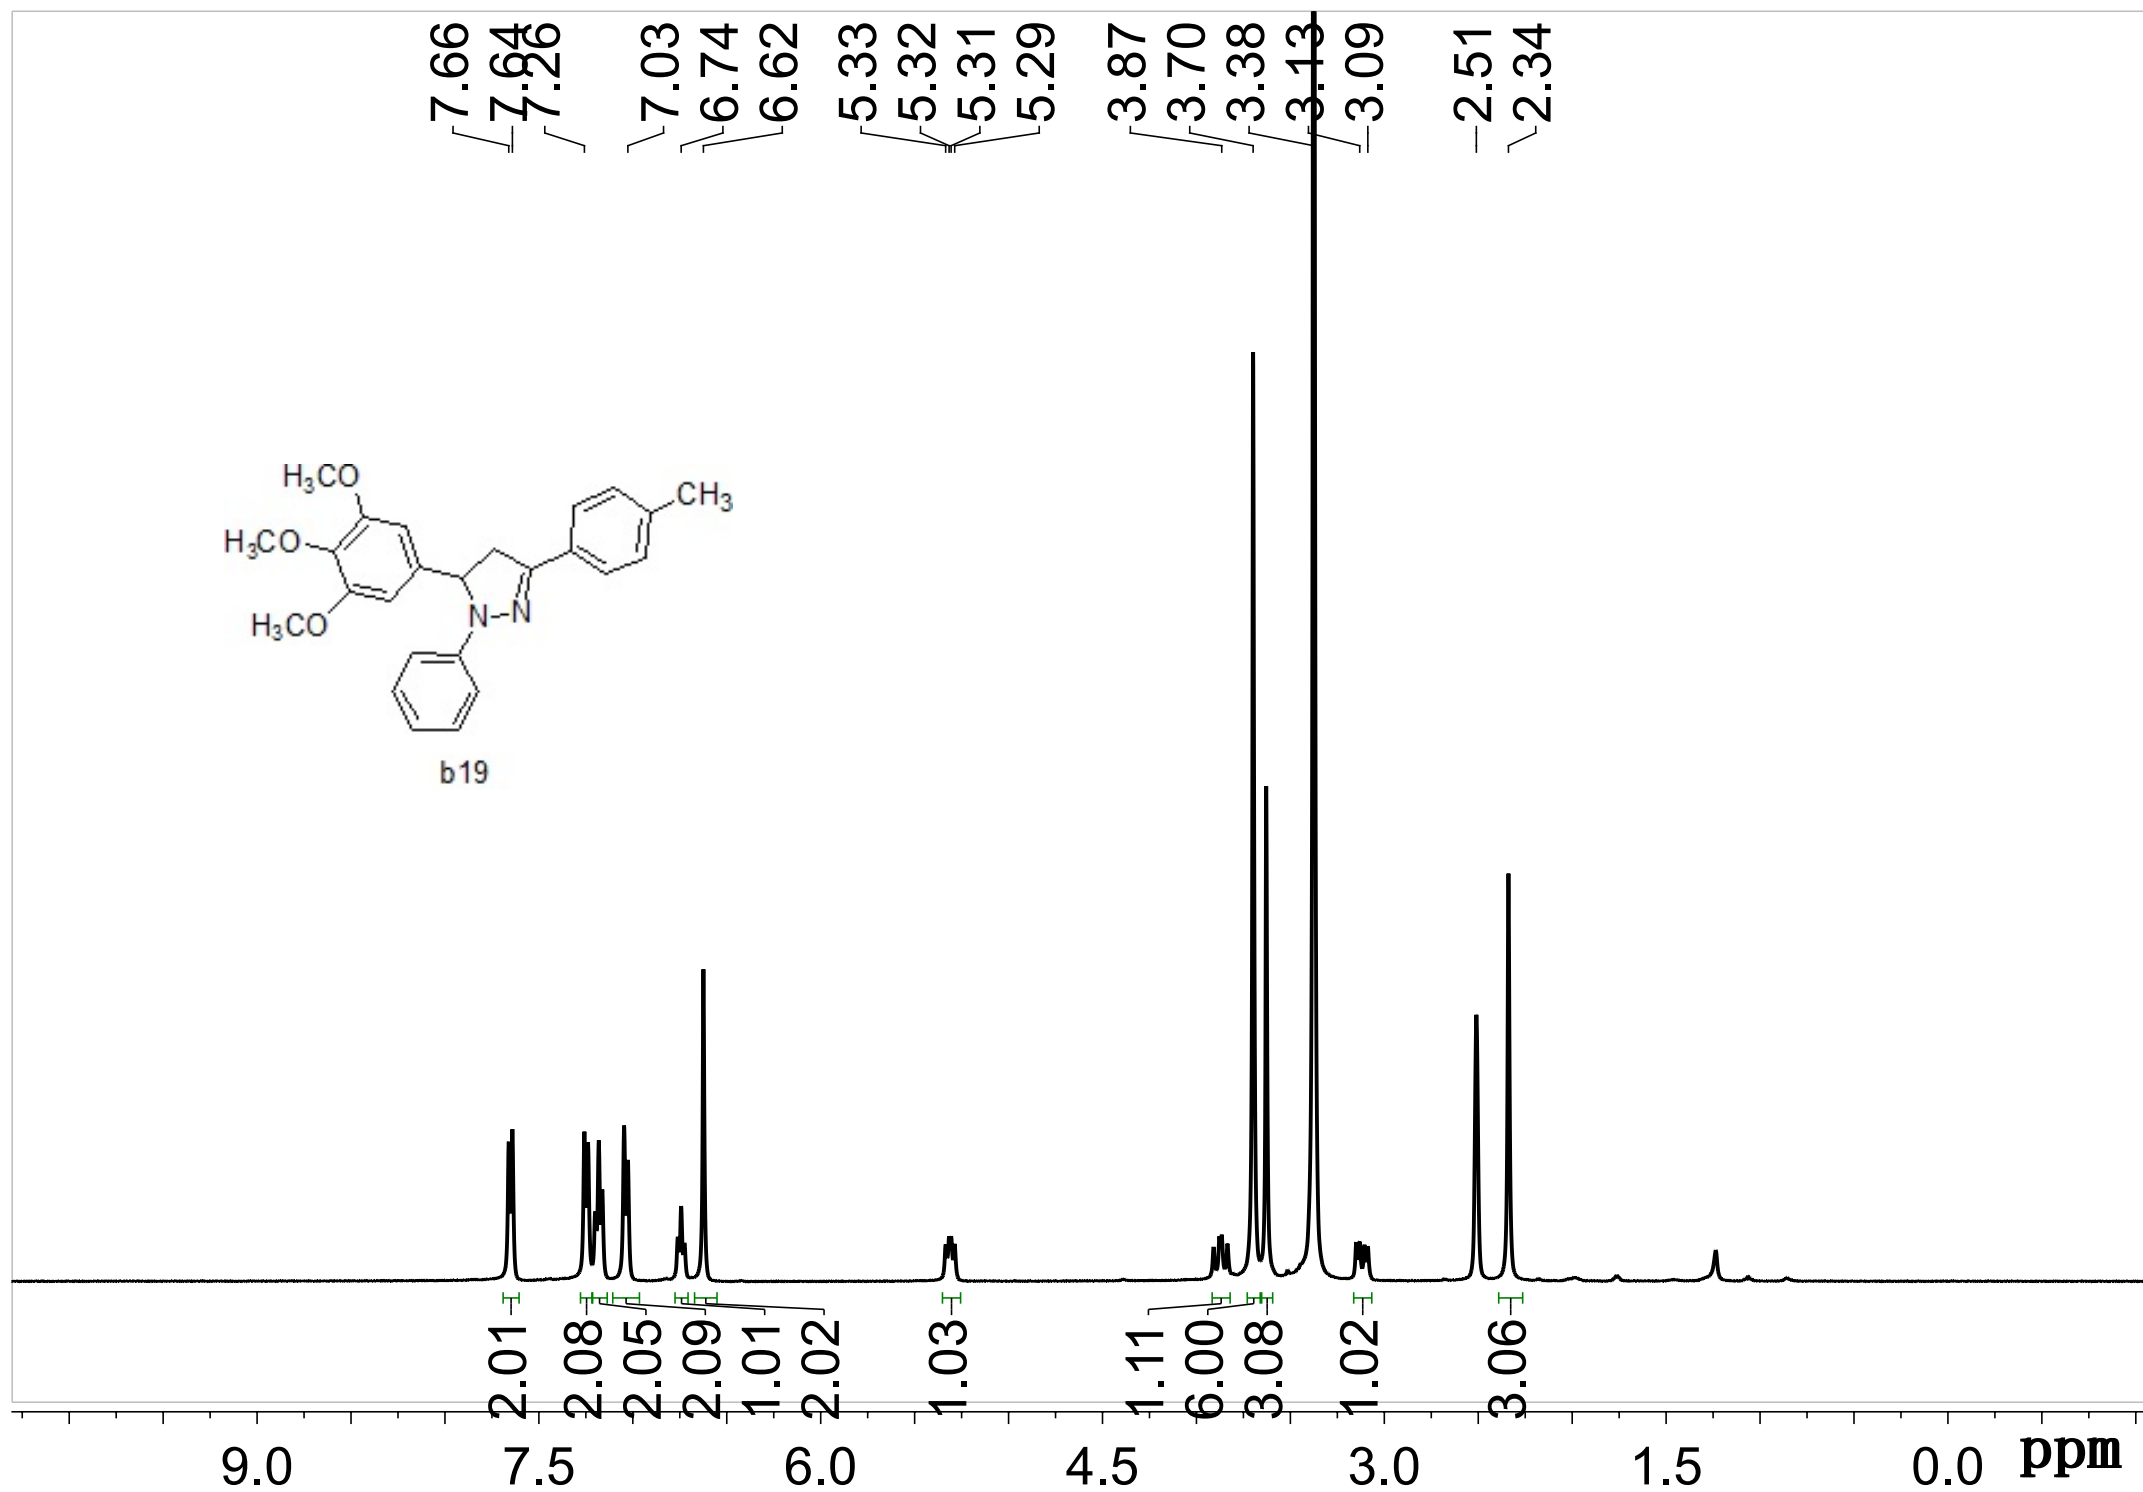



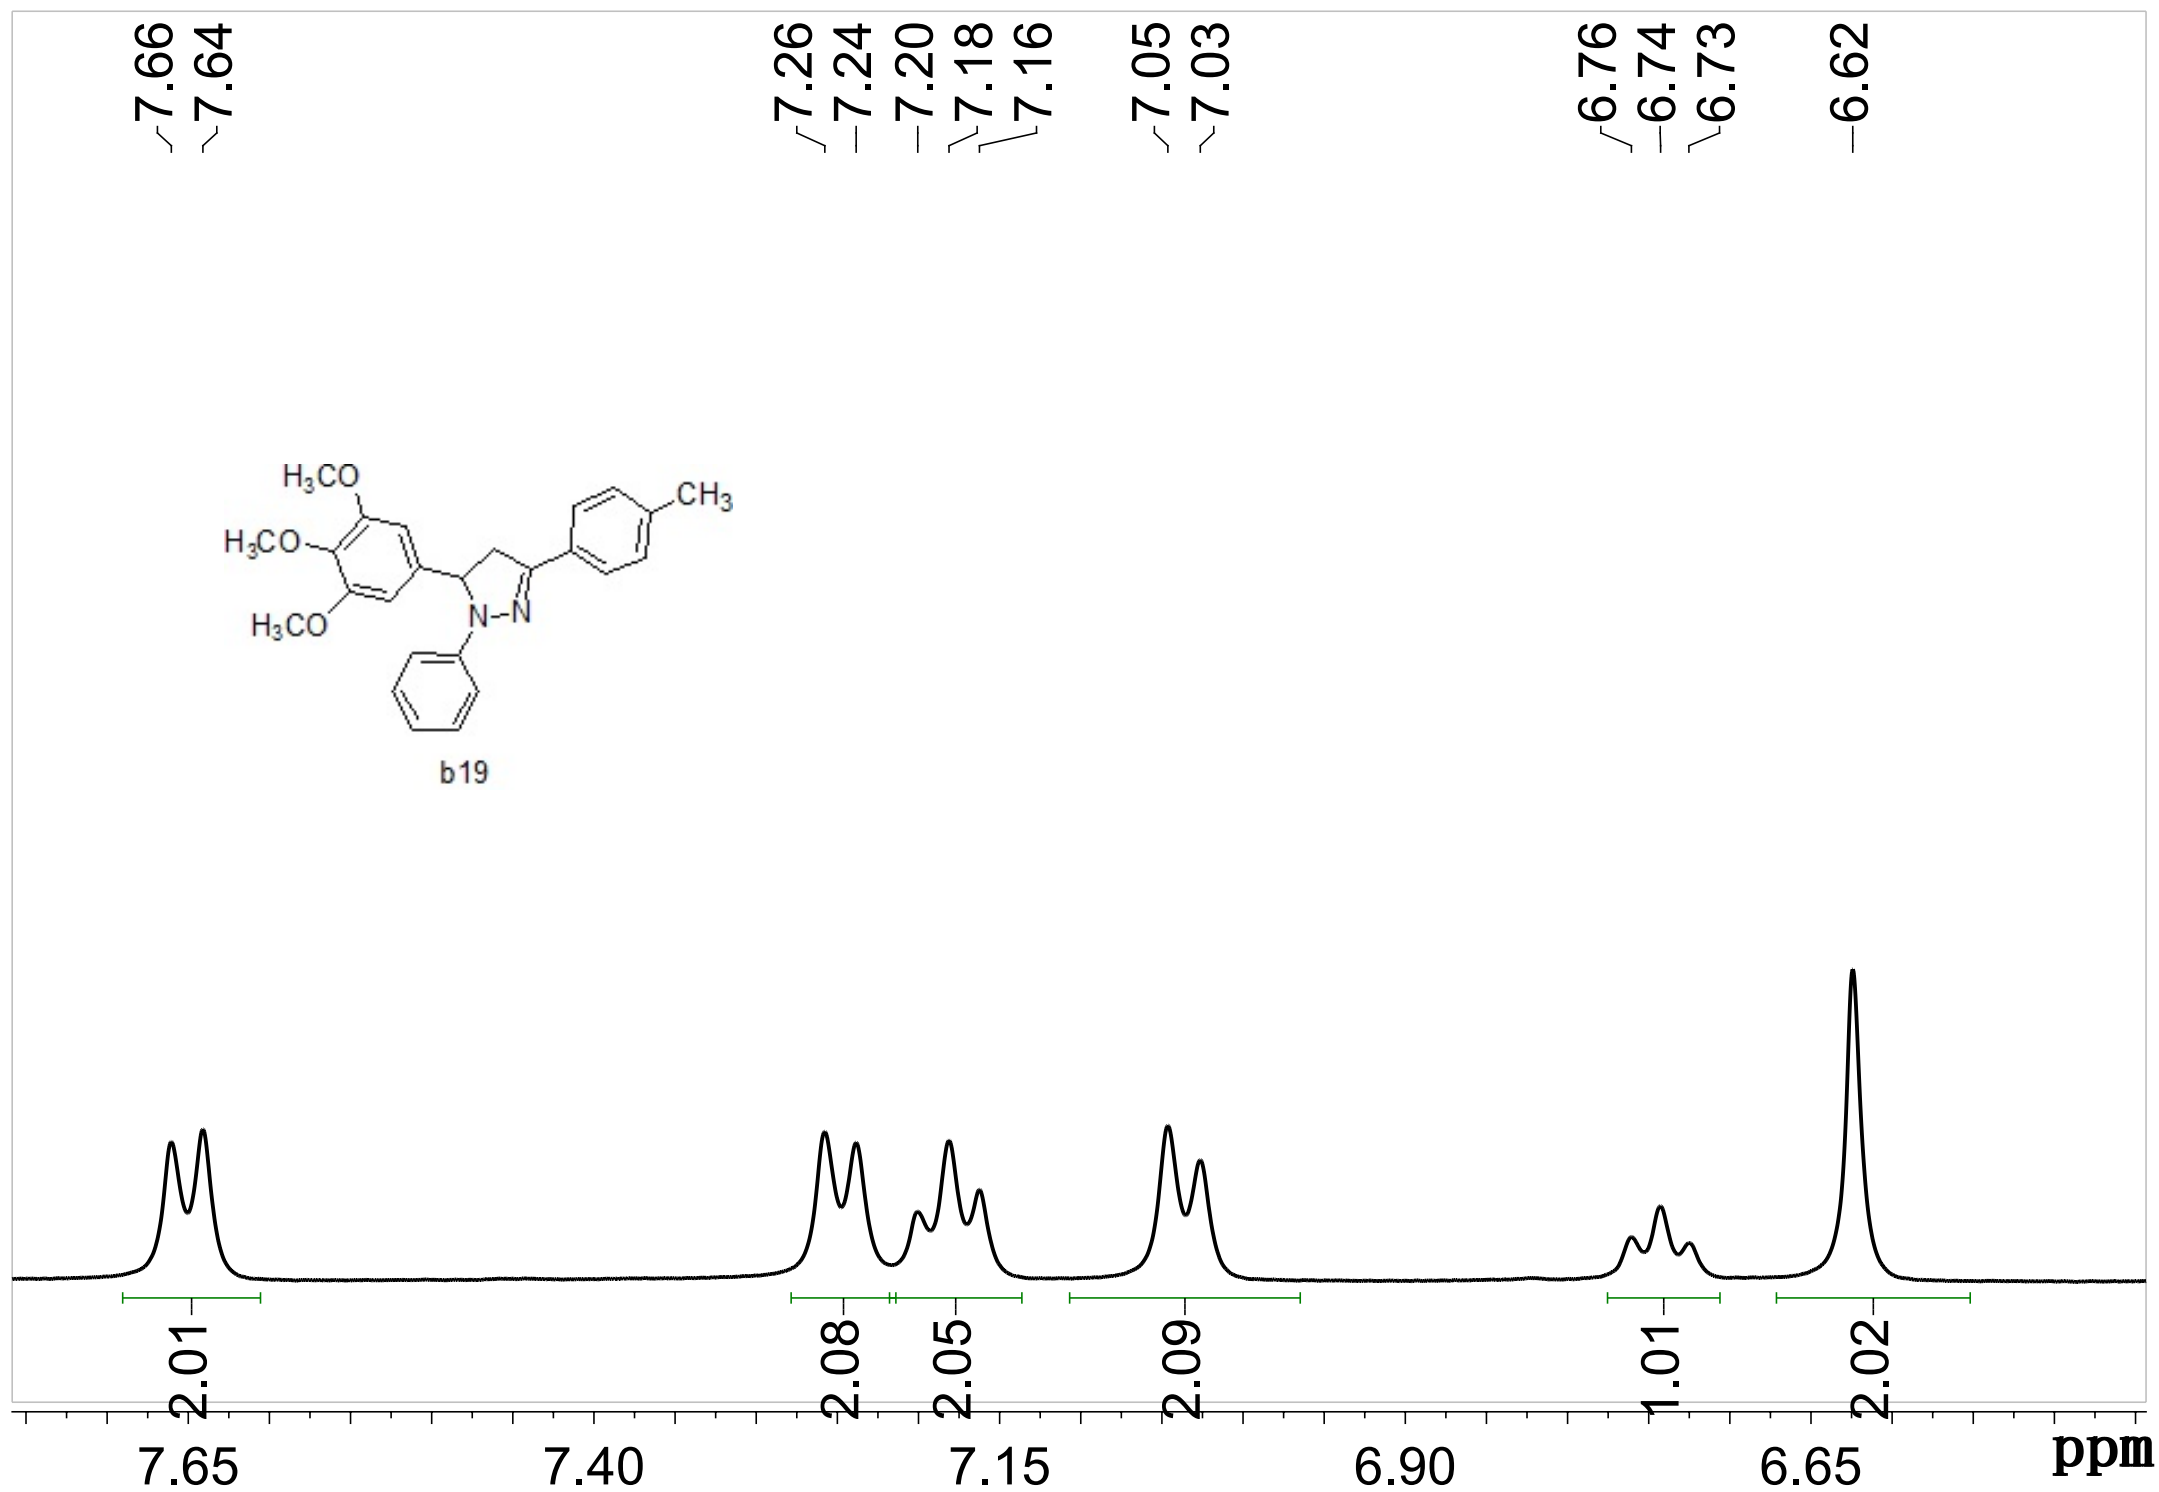

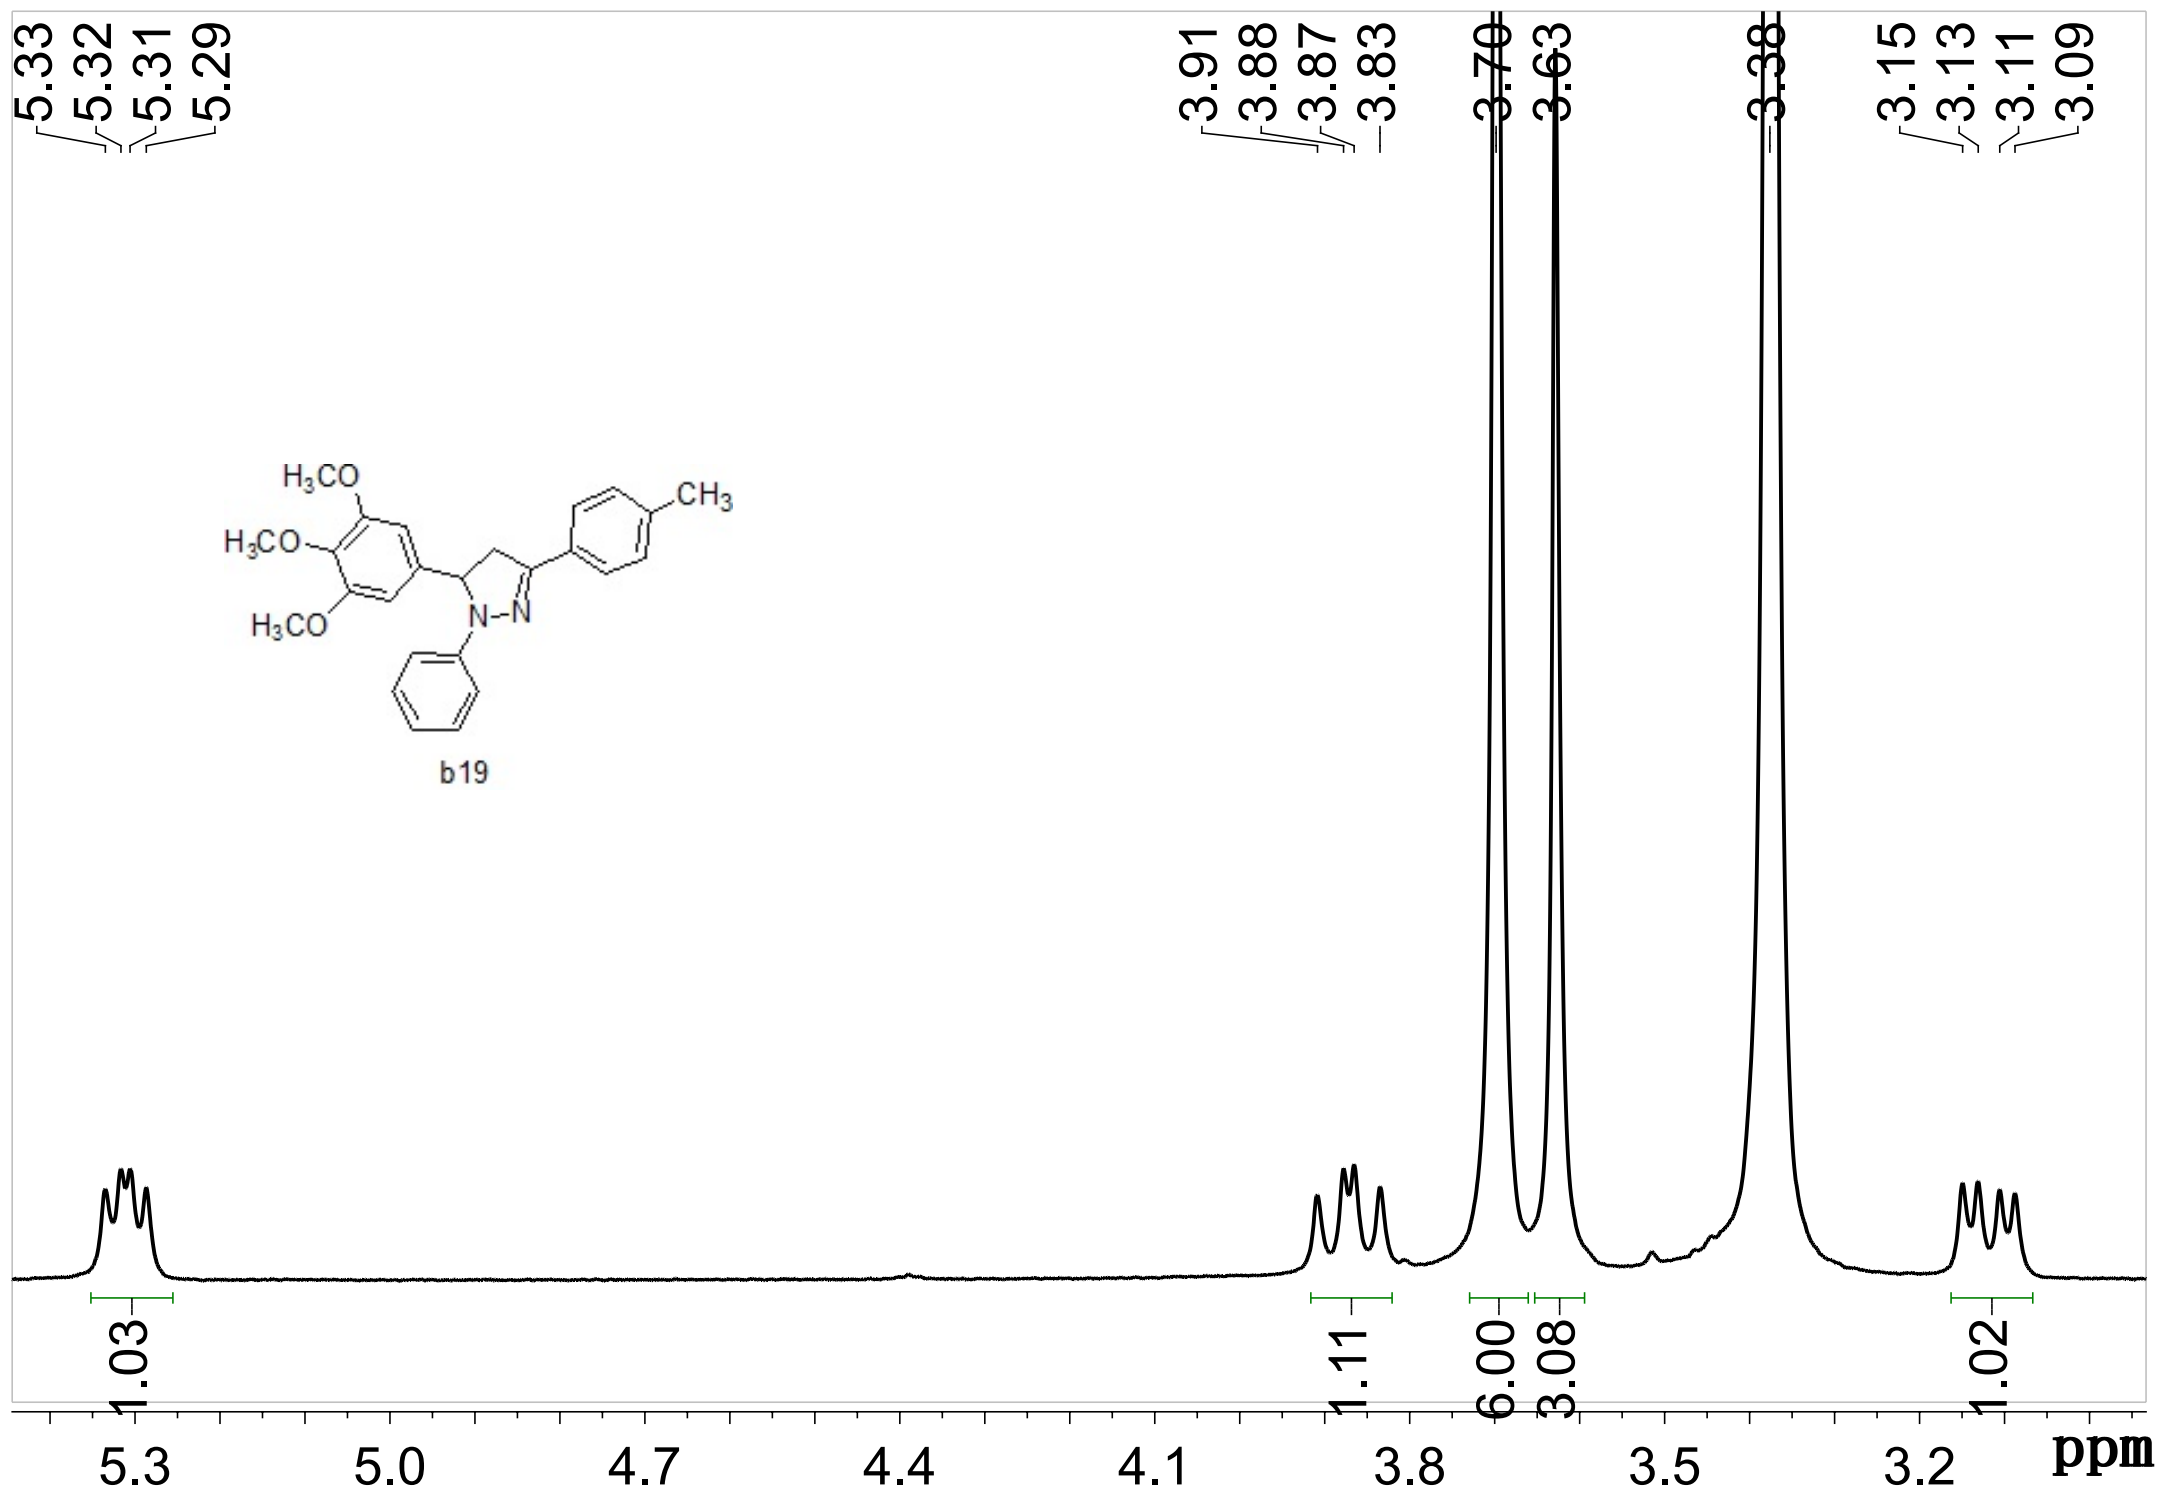

Supplement: s1 [file s1]
