# Supplementary material for: Synthesis and Evaluation of New Pyrazoline Derivatives as Potential Anticancer Agents in HepG-2 Cell Line
Source: MDPI journal article supplement (doi:10.3390/molecules22030467), 2017-03-16

# Synthesis and Evaluation of New Pyrazoline Derivatives as Potential Anticancer Agents in HepG-2 Cell Line

Wei jie Xu <sup>1,†</sup>, Ying Pan <sup>1,†</sup>, Hong Wang <sup>1,†</sup>, Haiyan Li <sup>2</sup>, Qing Peng <sup>3</sup>, Duncan Wei <sup>1</sup>, Cheng Chen <sup>1</sup> and Jinhong Zheng <sup>1,\*</sup>

<sup>1</sup> Department of Chemistry, Shantou University Medical College, Shantou 515041, Guangdong, China; 13536920534@163.com (W.X.); ypan@stu.edu.cn (Y.P.); 13592851552@163.com (H.W.); weiduncan2012@163.com (D.W.); 13411963192@163.com (C.C.); [jhzheng@stu.edu.cn](mailto:jhzheng@stu.edu.cn) (J.Z)

<sup>2</sup> Department of Pharmacology, Shantou University Medical College, Shantou 515041, Guangdong, China; [13066360950@163.com](mailto:13066360950@163.com) (H.L.)

<sup>3</sup> Department of Hepatobiliary Surgery II, Zhujiang Hospital of Southern Medical University, Guangzhou 510280, Guangdong, China; [zhujiangzhuanhua@163.com](mailto:zhujiangzhuanhua@163.com) (Q.P.)

\* Correspondence: [jhzheng@stu.edu.cn](mailto:jhzheng@stu.edu.cn); Tel.: +86-754-8890-0499; Fax: +86-754-8855-7562

† These authors contributed equally to this work.

Structure of compound **b17**:

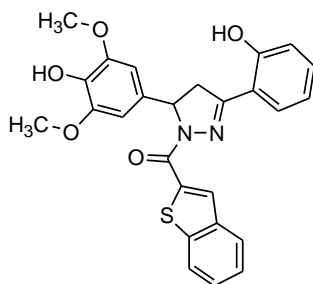

Analysis: b17

Acquisition Date: 2/28/2017

Name: b17

Comment: ESI Negative

Operator: TIPC

2017022805 #12 RT: 0.12 AV: 1 NL: 5.11E7

T: FTMS - p ESI Full ms [50.00-750.00]

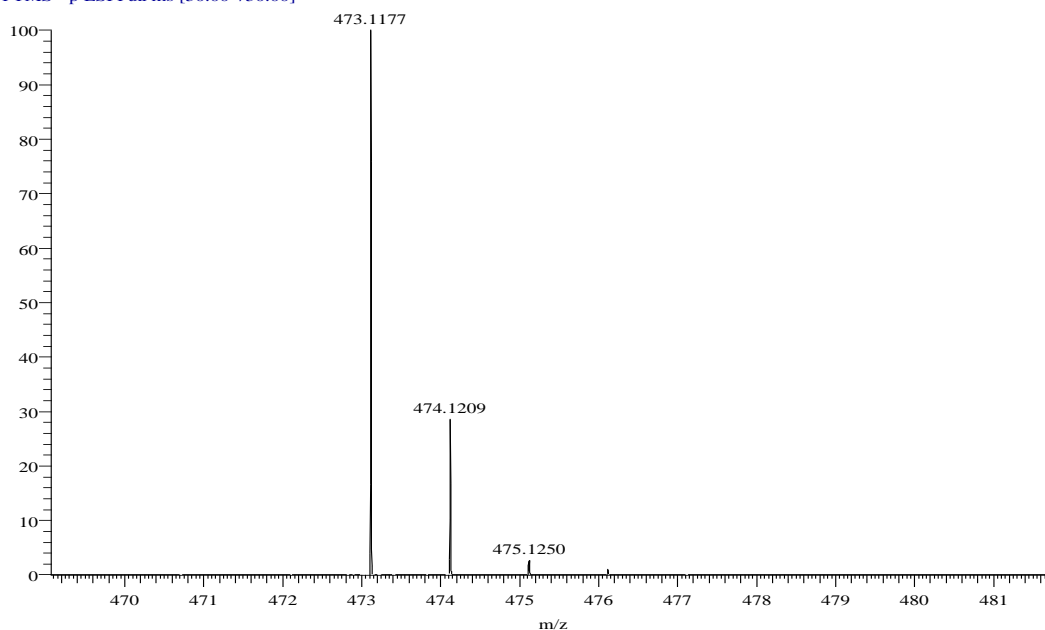

Supplement: s1 [file s1]
