# Supplementary material for: Synthesis and Evaluation of New Pyrazoline Derivatives as Potential Anticancer Agents in HepG-2 Cell Line
Source: MDPI journal article supplement (doi:10.3390/molecules22030467), 2017-03-16

# Synthesis and Evaluation of New Pyrazoline Derivatives as Potential Anticancer Agents in HepG-2 Cell Line

Weijie Xu <sup>1,†</sup>, Ying Pan <sup>1,†</sup>, Hong Wang <sup>1,†</sup>, Haiyan Li <sup>2</sup>, Qing Peng <sup>3</sup>, Duncan Wei <sup>1</sup>, Cheng Chen <sup>1</sup> and Jinhong Zheng <sup>1,\*</sup>

<sup>1</sup> Department of Chemistry, Shantou University Medical College, Shantou 515041, Guangdong, China; 13536920534@163.com (W.X.); ypan@stu.edu.cn (Y.P.); 13592851552@163.com (H.W.); weiduncan2012@163.com (D.W.); 13411963192@163.com (C.C.); [jhzheng@stu.edu.cn](mailto:jhzheng@stu.edu.cn) (J.Z)

<sup>2</sup> Department of Pharmacology, Shantou University Medical College, Shantou 515041, Guangdong, China; [13066360950@163.com](mailto:13066360950@163.com) (H.L.)

<sup>3</sup> Department of Hepatobiliary Surgery II, Zhujiang Hospital of Southern Medical University, Guangzhou 510280, Guangdong, China; [zhujiangzhuanhua@163.com](mailto:zhujiangzhuanhua@163.com) (Q.P.)

\* Correspondence: [jhzheng@stu.edu.cn](mailto:jhzheng@stu.edu.cn); Tel.: +86-754-8890-0499; Fax: +86-754-8855-7562

† These authors contributed equally to this work.

158.08  
156.86  
156.77  
148.11  
132.04  
126.63  
125.49  
124.85  
122.54  
119.64  
117.00  
116.72  
103.17

56.02  
44.01  
40.41  
40.03  
39.91  
39.77  
39.64  
39.50  
39.36  
39.22  
39.08

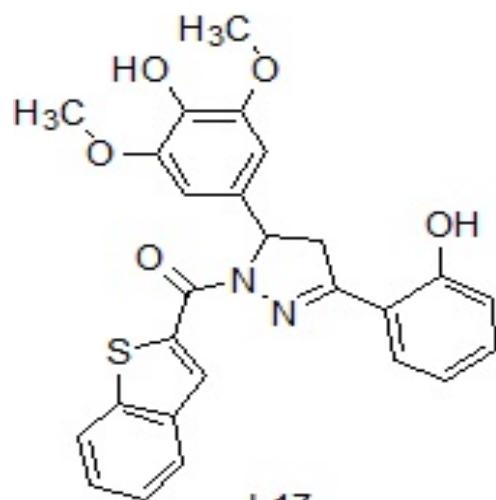

b17

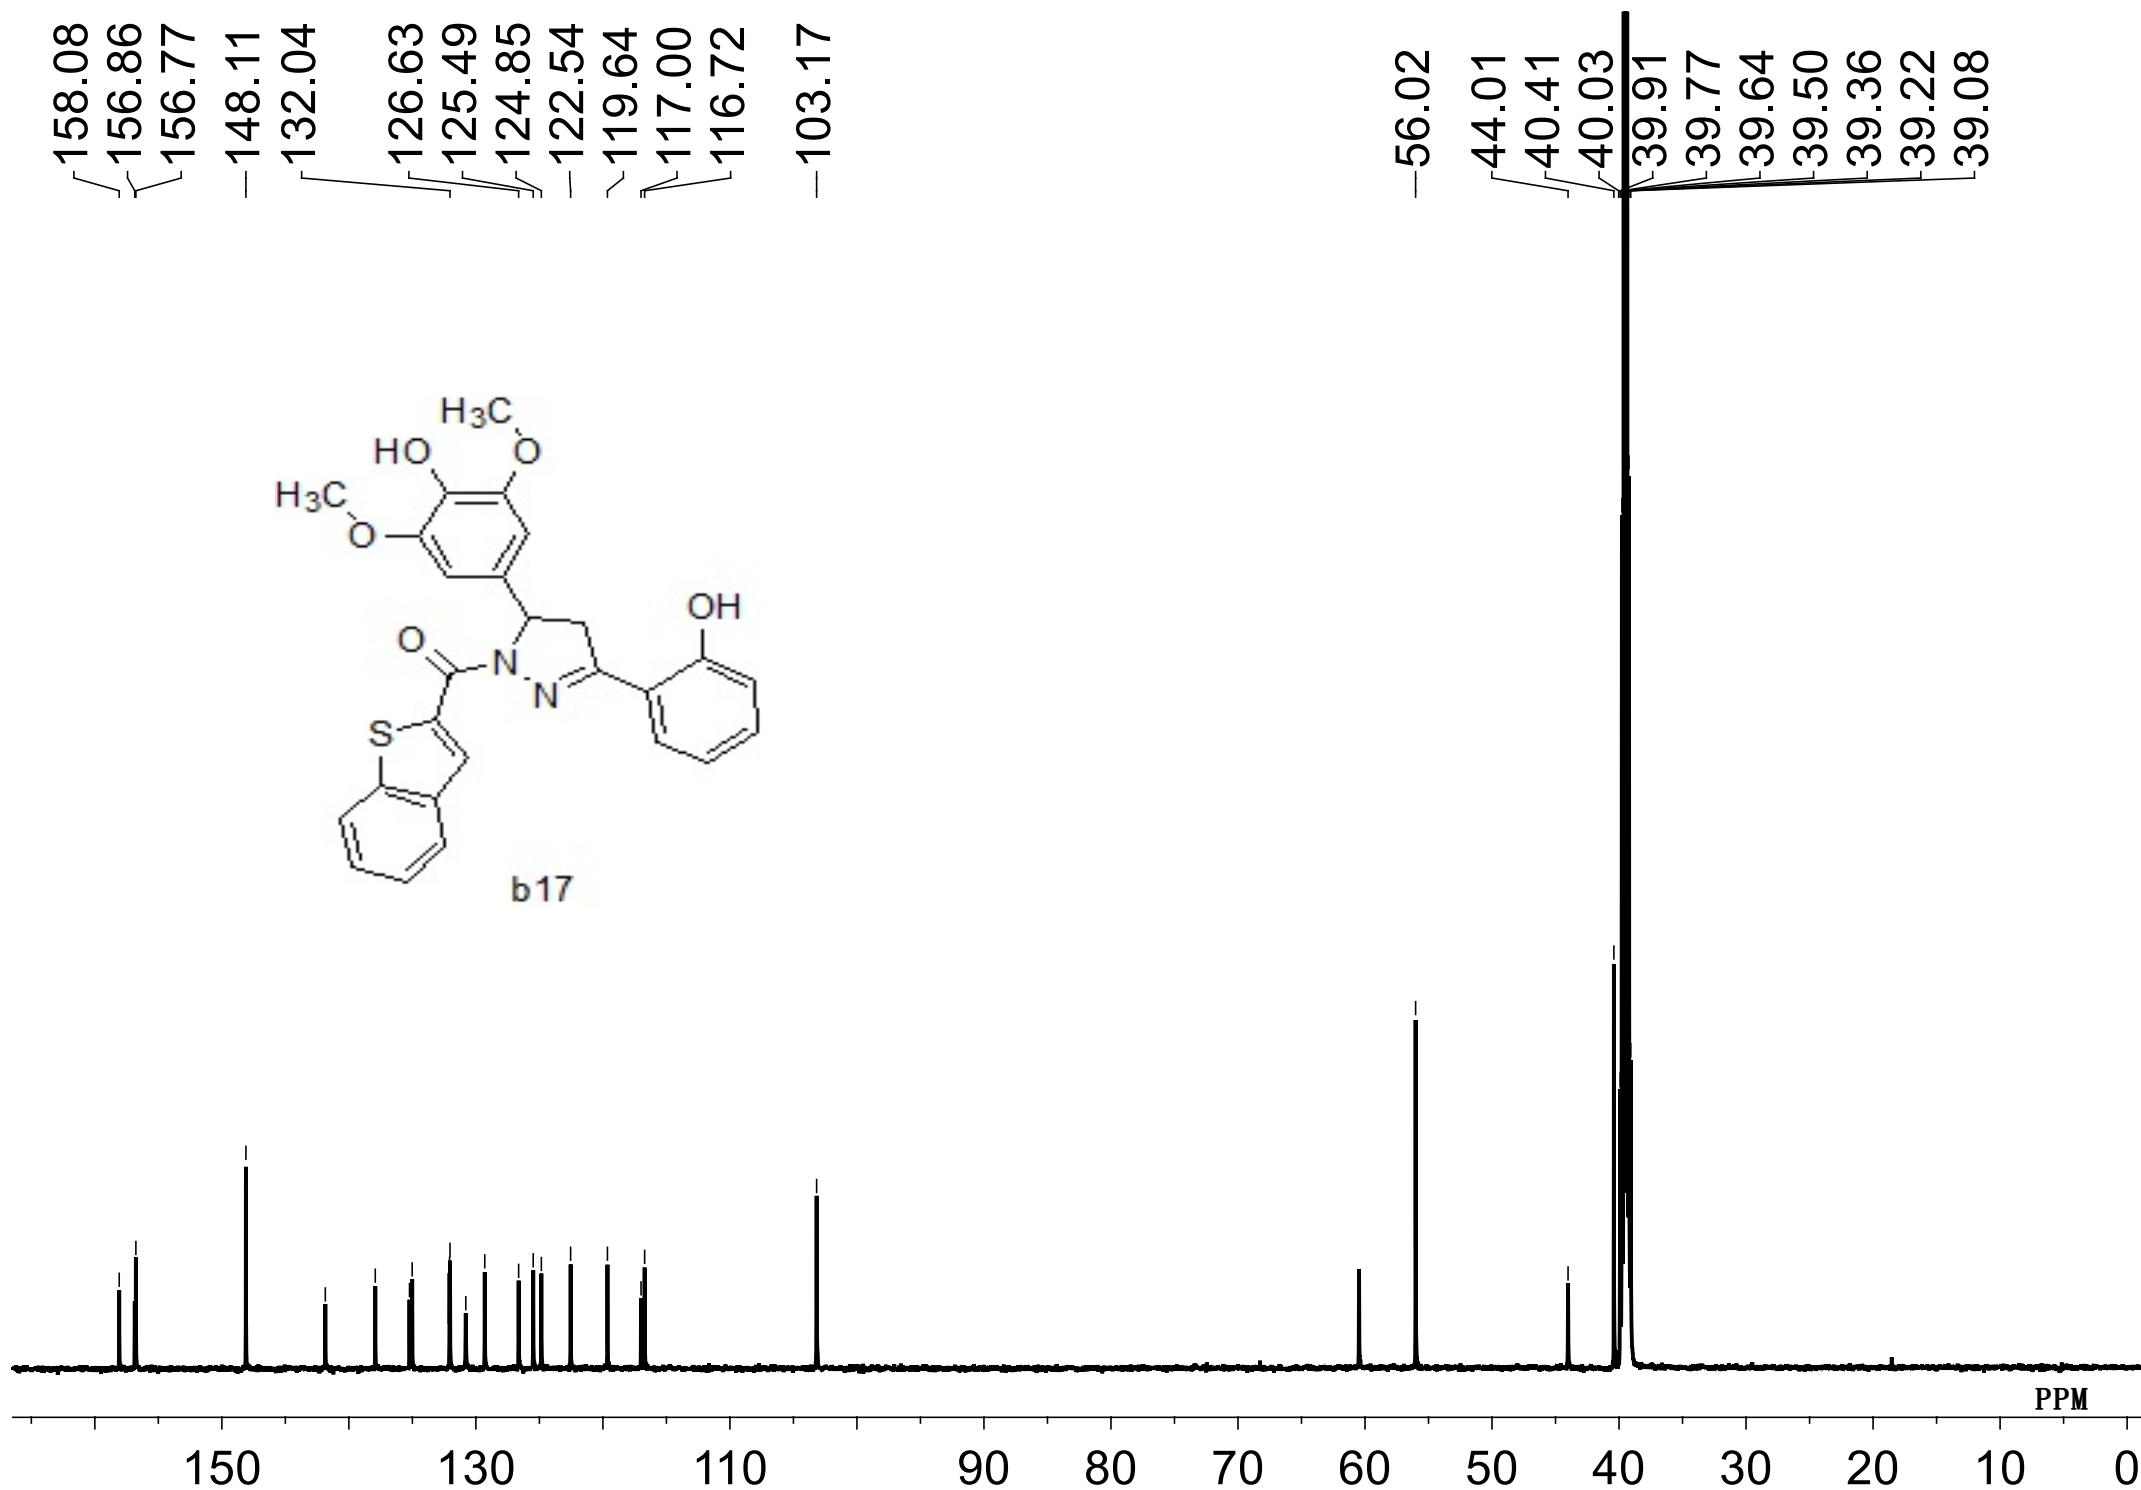

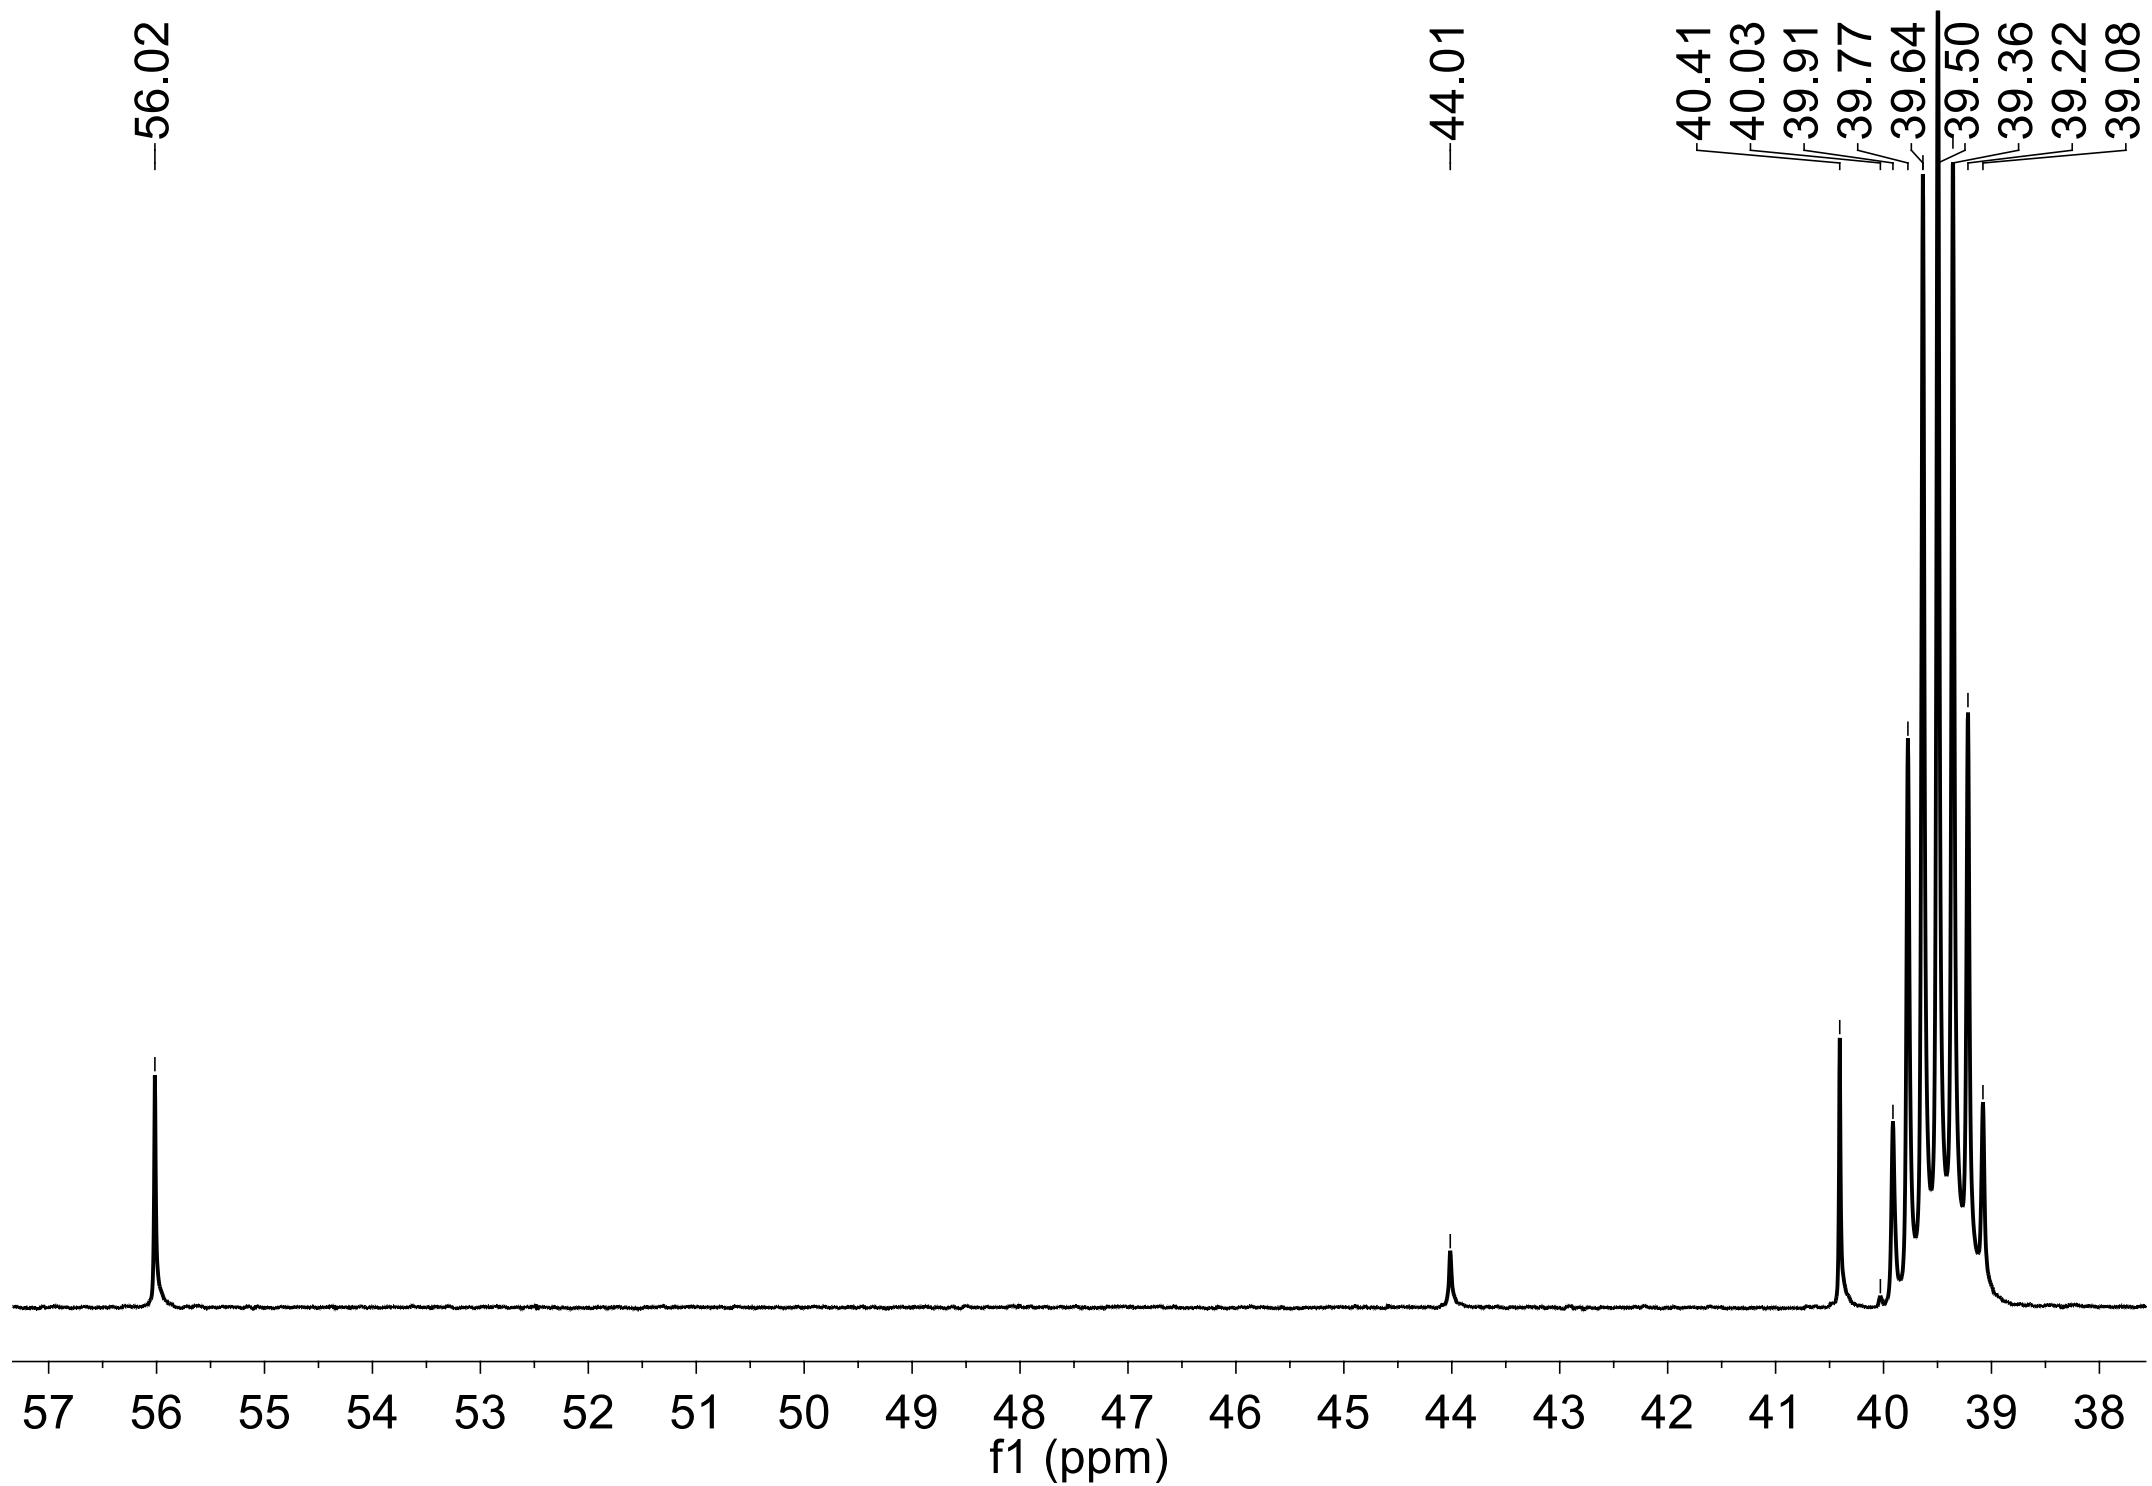

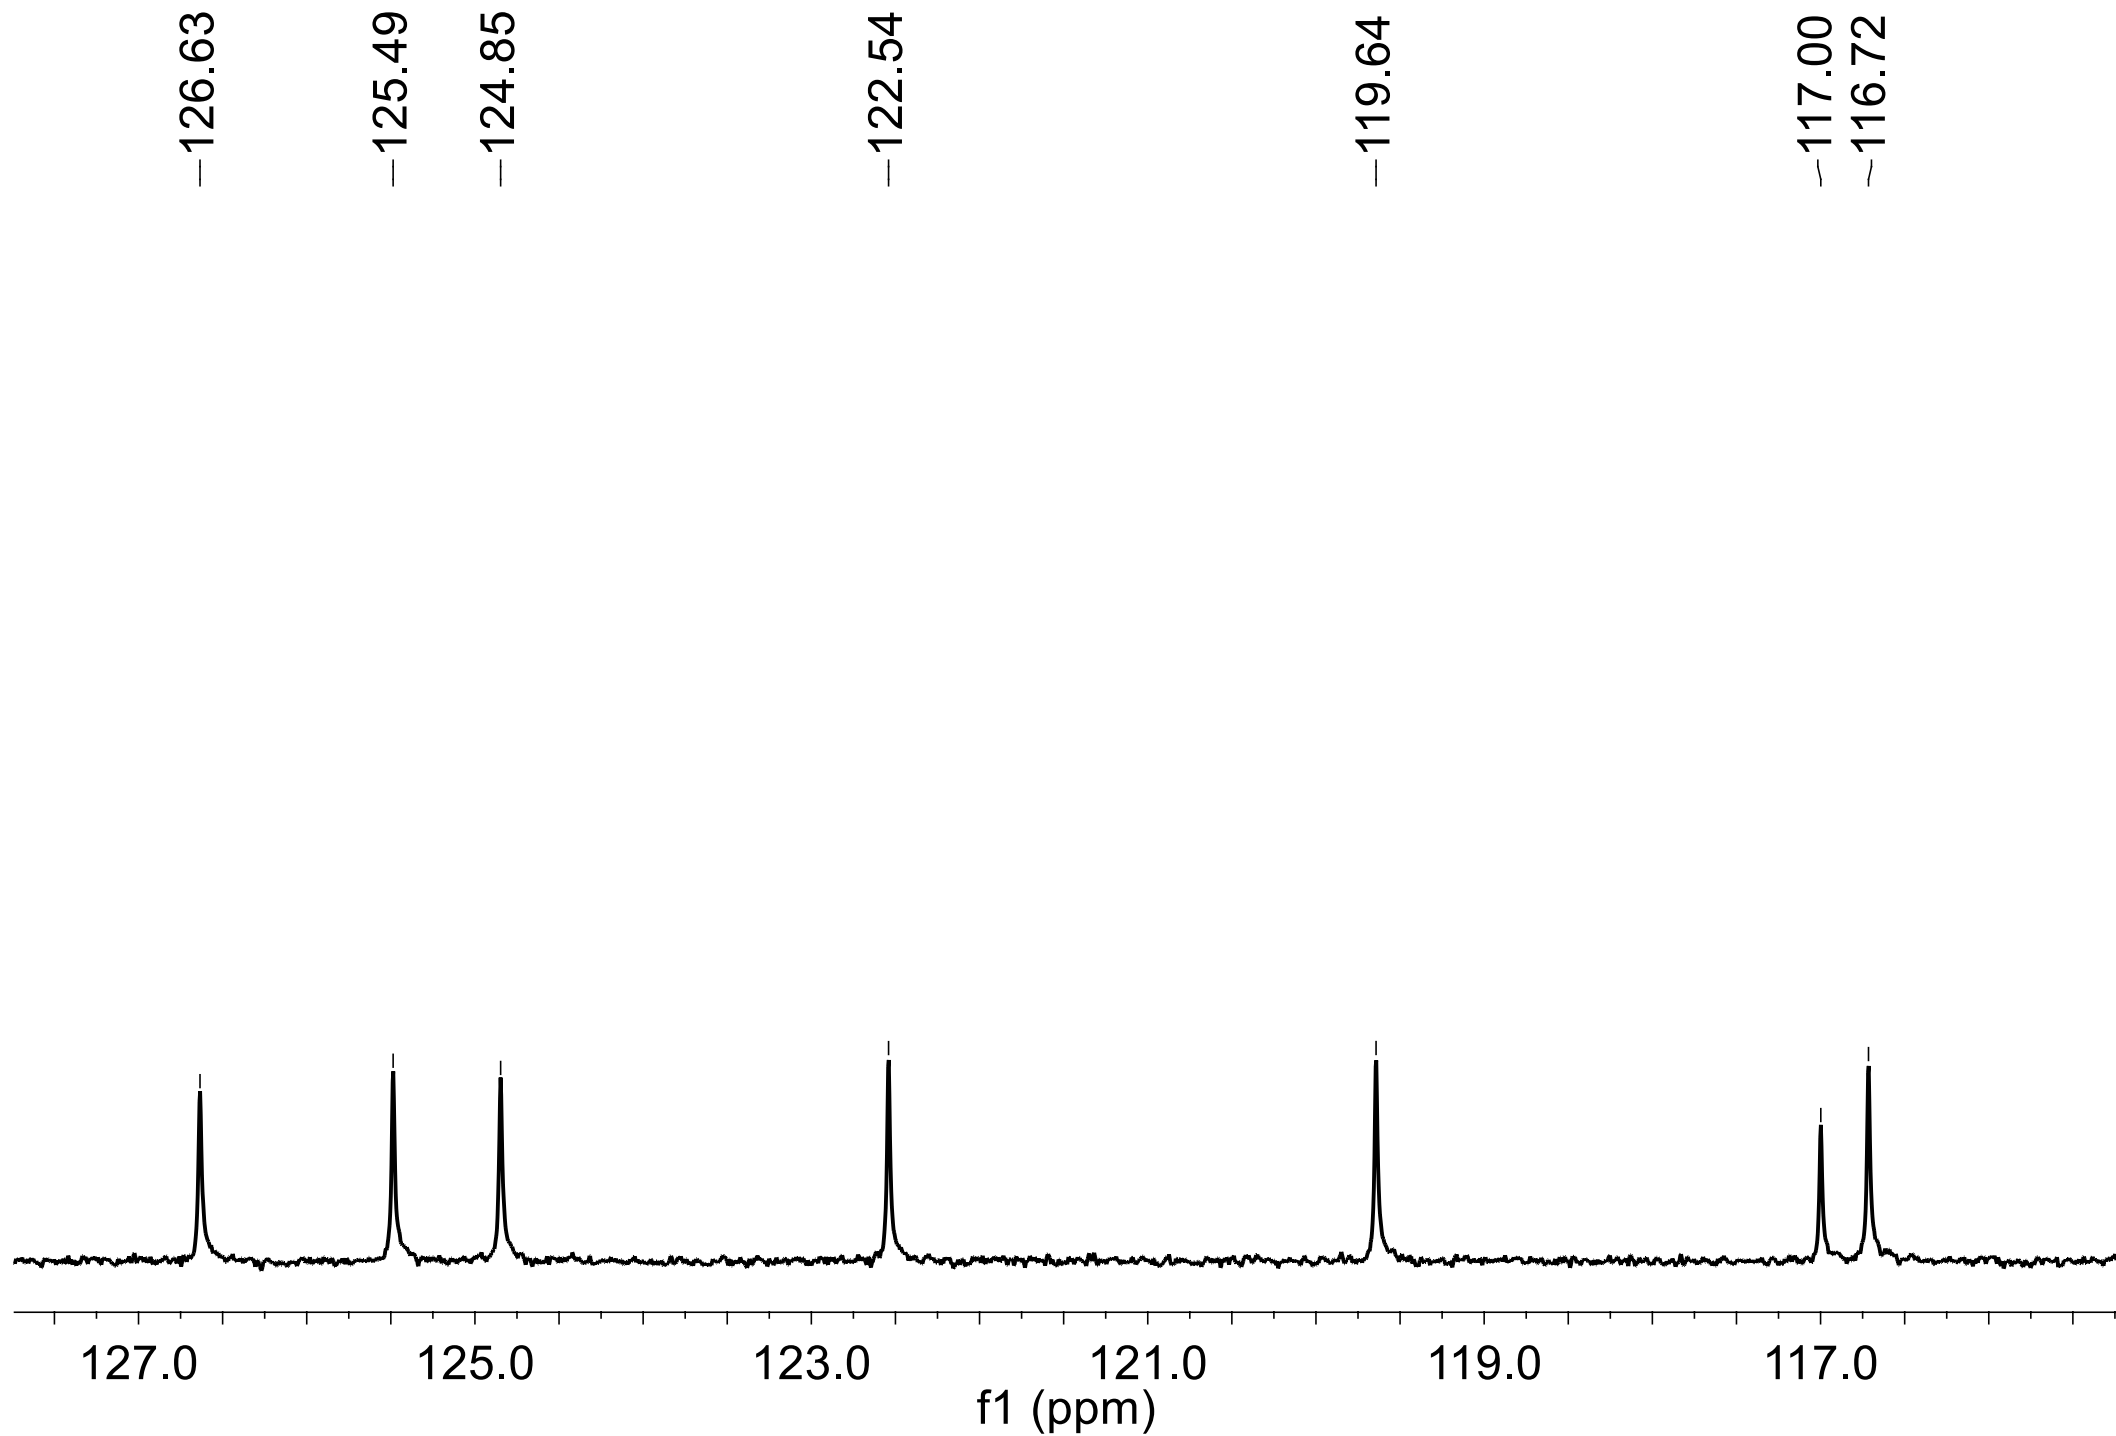

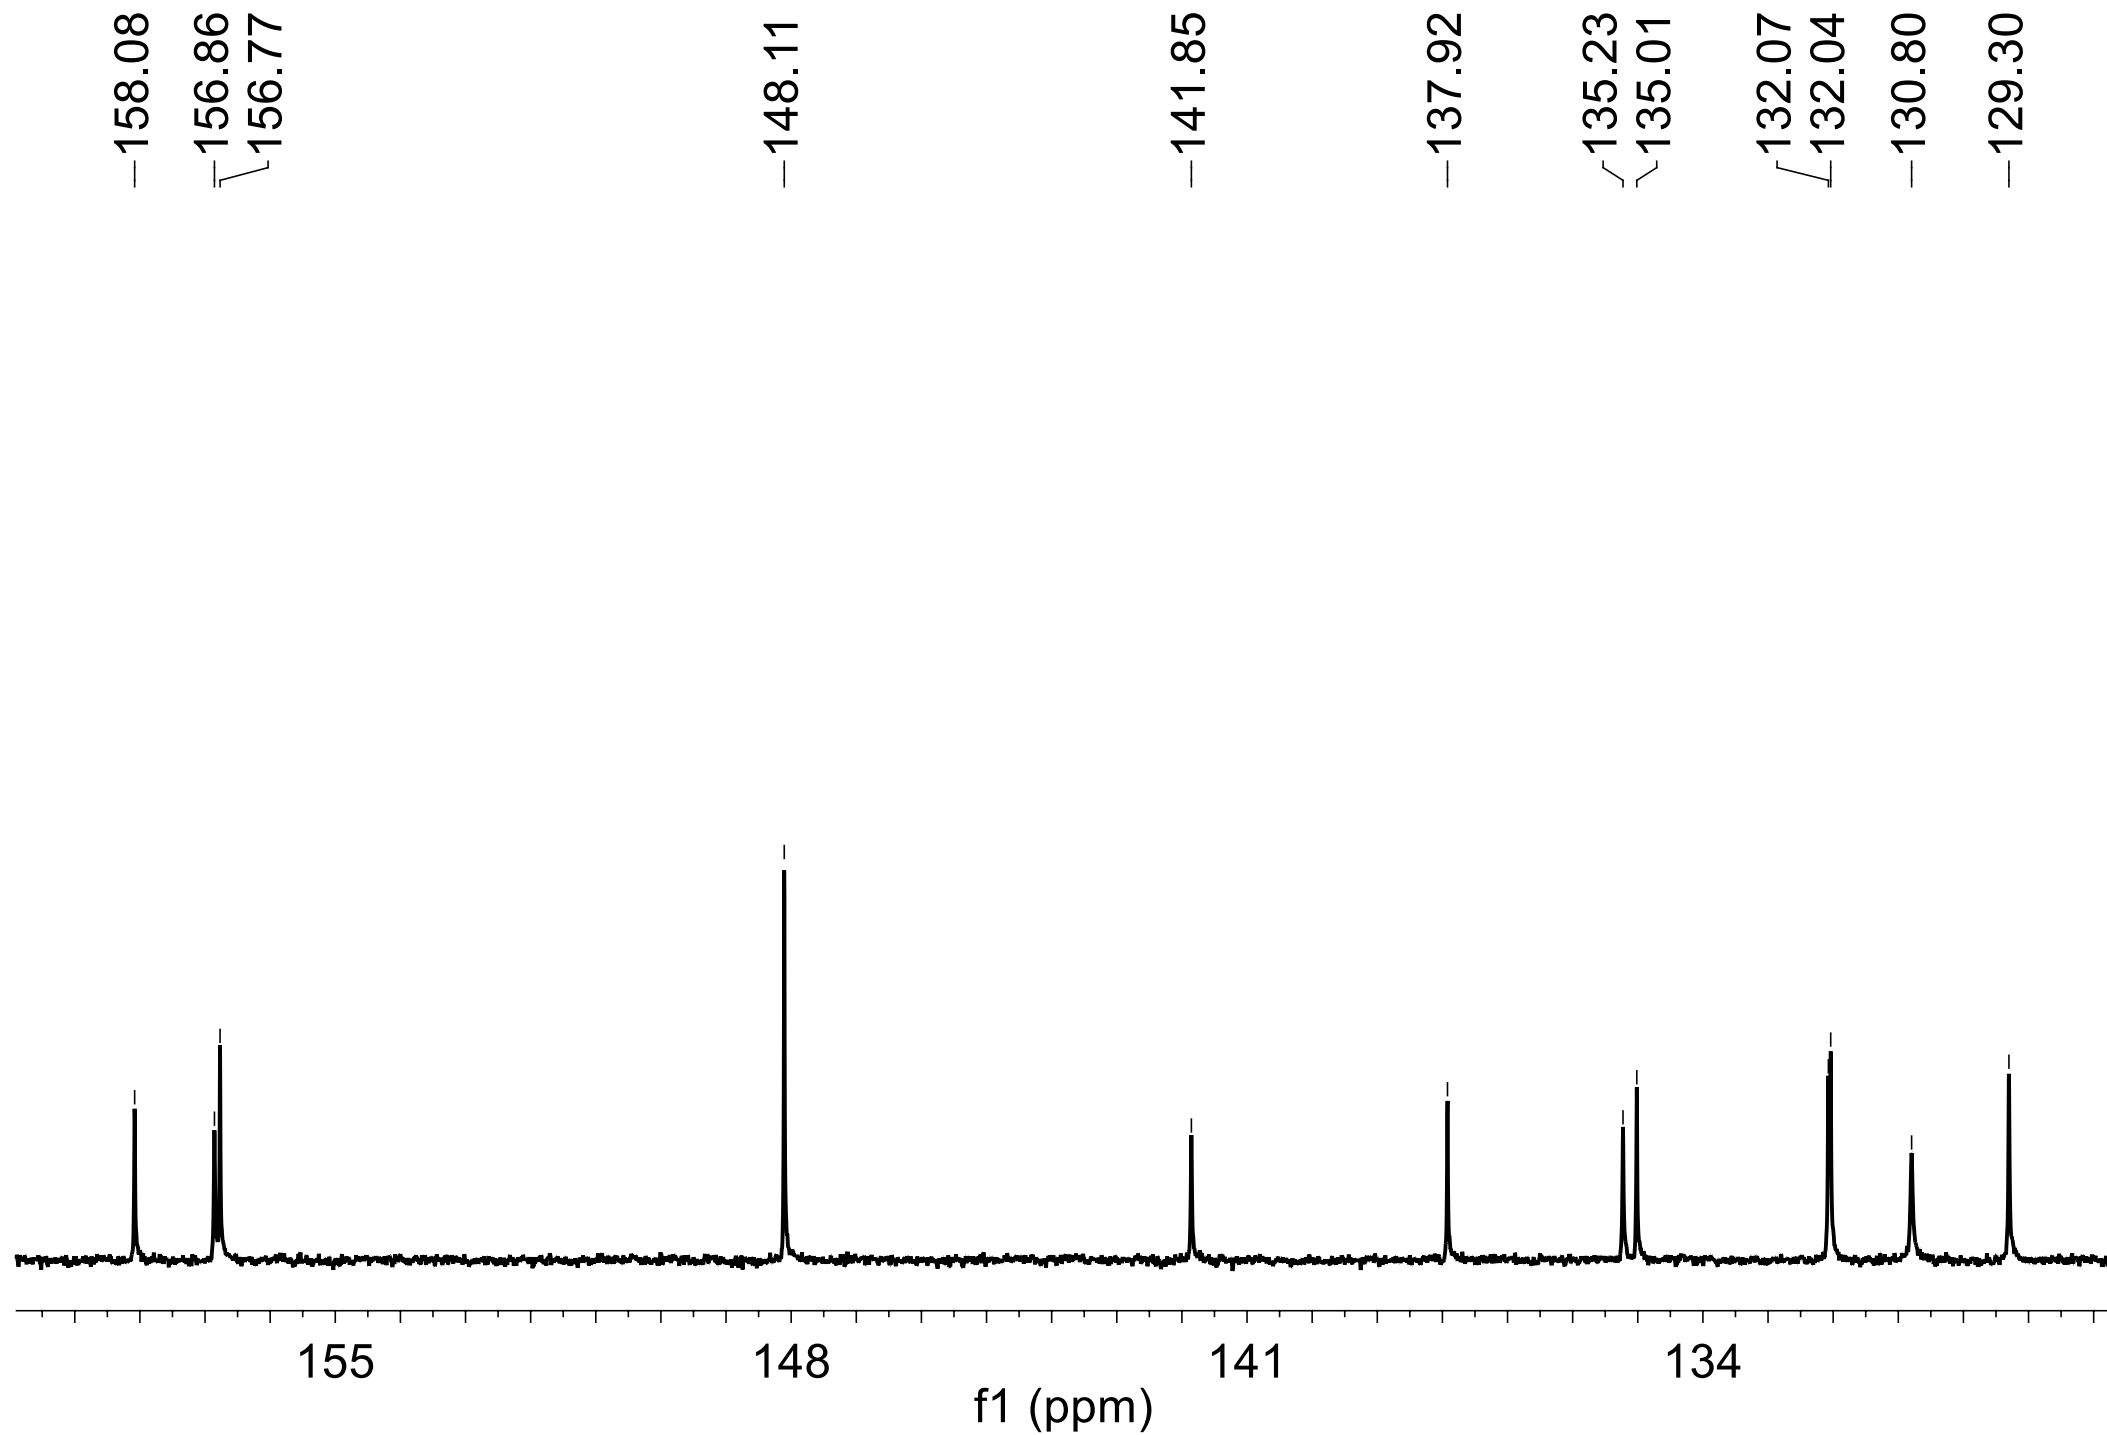

Supplement: s1 [file s1]
